# Supplementary material for: Altered lipid metabolism in the aging kidney identified by three layered omic analysis
Source: Aging (Albany NY). 2016 Feb 16;8(3):441–54. doi: 10.18632/aging.100900 (PMC4833139; doi:10.18632/aging.100900)
Supplement: Supplementary file 2 [file aging-08-441-s002.xlsx]

## Sheet: annotation
Supplemental Table 1 - List and annotation of quantified proteins
Gene names	Majority protein IDs	Protein names	t-test Difference_14vs96 (=log2 foldchange LFQ[14w/96w])	-Log t-test p value_14vs96	Significant
Actn1	A1BN54;Q7TPR4	Alpha-actinin-1	-0.872269	0.934653
Rpl19	A2A547;P84099	60S ribosomal protein L19	0.298384	0.177886
Mapt	B1AQW2;P10637;A2A5Y6	Microtubule-associated protein tau	0.0342231	0.0443474
Lsp1	A2A6J7;P19973;A2A6J4	Lymphocyte-specific protein 1	-0.224543	0.279264
Sept9	A2A6U3;Q80UG5;A2A6U5	Septin-9	-0.25246	0.814327
H6pd	Q8CFX1;A2A7A7	GDH/6PGL endoplasmic bifunctional protein;Glucose 1-dehydrogenase;6-phosphogluconolactonase	-0.620777	0.362193
Epb4.1;Epb41	A2A839;A2A838;P48193;A2A841;A2A842;A2AD32;F7BUB8;F6S4K9	Protein 4.1	-0.0691891	0.109183
Nt5c	A2A9X5;Q9JM14	5(3)-deoxyribonucleotidase, cytosolic type	-0.0898285	0.0324518
Rpn2	A2ACG7;Q9DBG6	Dolichyl-diphosphooligosaccharide--protein glycosyltransferase subunit 2	-0.493268	0.235833
Rpl32;Gm4987;Gm10064	P62911;A2AD25;F6WJV0	60S ribosomal protein L32	0.117954	0.151836
Ddi2	A2ADY9	Protein DDI1 homolog 2	0.0291066	0.0604474
Fhl1	P97447;A2AEX8;A2AEX6;A2AEY1;A2AEY2;A2AEX7	Four and a half LIM domains protein 1	-0.632172	0.922119
Eif4a3	A2AFK7;Q91VC3	Eukaryotic initiation factor 4A-III	0.187224	0.531635
Eftud2	G3UZ34;O08810;A2AH85	116 kDa U5 small nuclear ribonucleoprotein component	1.18915	1.08626	+
Pmpca	A2AIW9;Q9DC61	Mitochondrial-processing peptidase subunit alpha	-0.12689	0.15966
Fggy	A2AJL3;A2AJL4	FGGY carbohydrate kinase domain-containing protein	0.307627	0.936411
Mup8;Mup7;Mup1;Mup6;Mup17;Mup15;Mup2;Mup9;Mup14;Mup13;Mup10;Mup11	P04938;Q58EV3;P11588;P02762;B5X0G2;A9R9W0;A2CEL1;A2AKN9;A2BIM8;B8JI96;L7MUC7;A2CEK6;P11589;A2CEK7;A2BIN1;A2AKN8;A9C497;E9QA79;A9C496;A2CEL0;A2BIN0;L7N222;E9PVW0	Major urinary proteins 11 and 8;Major urinary protein 1;Major urinary protein 6;Major urinary protein 17;Major urinary protein 2	0.403096	0.436629
Agps	Q8C0I1;A2AL50;H3BKN2;A2AL49	Alkyldihydroxyacetonephosphate synthase, peroxisomal	0.920835	1.26706
Ndufb6	A2AP32;Q3UIU2	NADH dehydrogenase [ubiquinone] 1 beta subcomplex subunit 6	0.483448	0.888261
Slc12a1	A2AQ52;A2AQ51;A2AQ50;P55014	Solute carrier family 12 member 1	0.149264	0.171172
Cops2	A2AQE4;P61202	COP9 signalosome complex subunit 2	-0.422984	0.515114
Acss2	Q9QXG4;A2AQN5;A2AQN4	Acetyl-coenzyme A synthetase, cytoplasmic	-0.0463862	0.0747489
Lrp2	A2ARV4	Low-density lipoprotein receptor-related protein 2	0.44653	2.80254
Dhtkd1	A2ATU0	Probable 2-oxoglutarate dehydrogenase E1 component DHKTD1, mitochondrial	-0.146538	0.106456
Tpd52l2	Q3TUJ9;Q8BKP1;Q3TAI4;Q9CYZ2;A2AUD5;F6VQ81	Tumor protein D54	-0.164045	0.304735
Epb4.1l1;Epb41l1	A2AUK7;A2AUK8;Q9Z2H5;A2AUK5;A2AUK6;E9PV14	Band 4.1-like protein 1	-0.0496407	0.107458
Rrbp1	A2AVJ7;Q99PL5	Ribosome-binding protein 1	0.109149	0.111803
Set	A2BE93;Q9EQU5;A2BE92	Protein SET	0.113261	0.313258
Dync1i2	A2BFF8;O88487;Q3TPJ8;A2BFF5;A2BFF9	Cytoplasmic dynein 1 intermediate chain 2	-0.377153	0.91117
Arpc5l	Q9D898;A3KGQ6	Actin-related protein 2/3 complex subunit 5-like protein	-0.411777	0.492635
Ttc38	A3KMP2	Tetratricopeptide repeat protein 38	-0.2856	0.618819
Slc4a4	A7E1Z5;O88343;E9Q8N8	Electrogenic sodium bicarbonate cotransporter 1	0.296988	0.277086
Hbb-b1	A8DUK4;P02088	Hemoglobin subunit beta-1	-0.11055	0.0950619
Aspa	B0QZP3;V9GXG0;Q8R3P0	Aspartoacylase	0.325587	0.844512
Snap23	B0R030;O09044;Q9D3L3;B0R029;E9Q8A1	Synaptosomal-associated protein 23;Synaptosomal-associated protein	0.203568	0.29702
Ndufs5	B1ARW4;Q99LY9	NADH dehydrogenase [ubiquinone] iron-sulfur protein 5;NADH dehydrogenase [ubiquinone] iron-sulfur protein 5, N-terminally processed	0.304437	0.451626
Aldh3a2	P47740;B1AV77;B1ATI0	Fatty aldehyde dehydrogenase	0.198572	0.361339
Gps1	Q99LD4;Q3MIA8;B1ATU4;G3UXW9	COP9 signalosome complex subunit 1	0.186846	0.688893
Clta	B1AWE0;Q6PFA2;B1AWE1;O08585;B1AWD8;B1AWD9	Clathrin light chain A	-0.43357	0.585933
Pls3	Q99K51;B1AX58	Plastin-3	-0.393318	1.47746
Cobll1	B1AZ15;B1AZ14;Q3UMF0	Cordon-bleu protein-like 1	0.207982	0.536535
Hspg2	Q05793;B1B0C7;E9PZ16	Basement membrane-specific heparan sulfate proteoglycan core protein;Endorepellin;LG3 peptide	0.202784	0.157278
Mylk	Q6PDN3;B1B1A8	Myosin light chain kinase, smooth muscle;Myosin light chain kinase, smooth muscle, deglutamylated form	-0.456154	0.716989
Hnrnpk;Gm7964	B2M1R6;P61979;H3BKD0;H3BLL4;D3Z5X4;D3YWG1;H3BK96	Heterogeneous nuclear ribonucleoprotein K	-0.187012	0.588537
Chchd2;2410018M08Rik	Q9D1L0;D3Z5B1;B2RPU8	Coiled-coil-helix-coiled-coil-helix domain-containing protein 2, mitochondrial	-0.114017	0.116845
Cgnl1	B2RSU6;Q6AW69;D3Z3H4	Cingulin-like protein 1	-0.273869	0.55472
Flna	B7FAV1;B7FAU9;Q8BTM8	Filamin-A	-0.63914	2.08747
Ube2v1;Gm20431	Q9CZY3;B7ZBY7;E9PY39;B7ZBY6	Ubiquitin-conjugating enzyme E2 variant 1	-0.199094	0.754792
Psmc3	O88685;B7ZCF1;A2AGN7	26S protease regulatory subunit 6A	-0.0977139	0.219277
Mpp1	B7ZCL8;P70290;A2AN84;B7ZCL9	55 kDa erythrocyte membrane protein	0.139842	0.251899
Tjp1	B9EHJ3;P39447	Tight junction protein ZO-1	-0.0443735	0.112713
Gimap4	D3YTN4;Q99JY3	GTPase IMAP family member 4	0.452872	0.499286
Rps19	D3YUG3;Q9CZX8;D3Z5R8;D3Z722;S4R223	40S ribosomal protein S19	0.468571	0.619672
Ndufv1	D3YUM1;Q91YT0;D3Z1U9	NADH dehydrogenase [ubiquinone] flavoprotein 1, mitochondrial	-0.116357	0.168638
Cops4	D3Z1R9;D3YV99;F6QTS1;O88544	COP9 signalosome complex subunit 4	0.133611	0.190936
Capns1	D3YW48;O88456	Calpain small subunit 1	0.167586	0.407417
A2m;Pzp	Q61838;D3YW52	Alpha-2-macroglobulin;Alpha-2-macroglobulin 165 kDa subunit;Alpha-2-macroglobulin 35 kDa subunit	-1.28886	1.64214	+
Otub1	D3YWF6;Q7TQI3;D3Z7K0	Ubiquitin thioesterase OTUB1	-0.213055	0.504473
Qdpr	D3YWR7;Q8BVI4	Dihydropteridine reductase	0.229243	1.81559
Fuom	D3YWS7;Q8R2K1;F6SJM7;F6X9P4	Fucose mutarotase	0.75668	0.516824
Dctn1	D3YX34;E9Q586;E9Q3M3;O08788	Dynactin subunit 1	-0.272635	0.948908
Arpc2	D3YXG6;Q9CVB6	Actin-related protein 2/3 complex subunit 2	0.05125	0.259533
Vps29	D3YYD5;D3Z645;Q9QZ88	Vacuolar protein sorting-associated protein 29	0.238153	0.702767
Anp32a	D3YYE1;D3Z7M9;O35381;F6UFG6	Acidic leucine-rich nuclear phosphoprotein 32 family member A	-0.25302	0.325236
Rps5	D3YYM6;Q91V55;P97461	40S ribosomal protein S5;40S ribosomal protein S5, N-terminally processed	-0.0170541	0.0228894
Hacl1	D3YZ54;Q9QXE0;E9PWM4	2-hydroxyacyl-CoA lyase 1	0.126381	0.210238
Gsta2;Gm10639	D3YZV3;P10648;D3Z6A6;E9Q6L7	Glutathione S-transferase;Glutathione S-transferase A2	-0.547229	0.154337
Tmed7	E9Q7G1;D3YZZ5		-0.61365	1.00526
Acsl1	P41216;D3Z041	Long-chain-fatty-acid--CoA ligase 1	0.246482	0.601058
Tpd52	D3Z637;D3Z125;E9PUA7;D3Z7X7;Q62393;F8WHQ1;D3Z2U2	Tumor protein D52	0.147906	0.27596
Aspdh	D3Z253;Q9DCQ2	Putative L-aspartate dehydrogenase	0.804954	0.676909
Nfu1	D3Z285;Q9QZ23	NFU1 iron-sulfur cluster scaffold homolog, mitochondrial	-0.207111	0.224767
Ctnnd1	E9Q986;D3Z7H6;E9Q907;E9Q905;E9Q8Z4;E9Q8Z9;D3Z2H2;E9Q901;E9Q904;G3X9V2;P30999;E9Q8Z6;E9Q8Z8;E9Q906;E9Q903;E9Q8Z5;D3Z2H7	Catenin delta-1	-0.180432	0.473848
Tpm3-rs7;Tpm3	D3Z2H9;Q8K0Z5;E9Q5J9;P21107	Tropomyosin alpha-3 chain	-0.373865	0.902405
Gpx3	D3Z2Y7;P46412;D3Z7Y0	Glutathione peroxidase;Glutathione peroxidase 3	-1.43466	2.78228	+
Cope	D3Z315;O89079	Coatomer subunit epsilon	-0.199502	0.172287
Dlg1	D3Z3B8;H7BWY4;Q811D0;E9Q9H0	Disks large homolog 1	0.0610542	0.106433
Rpl11;Gm10036;Gm10288;Gm5093;Gm7589	Q9CXW4;E9PYL9;D3Z3K1;E9PZB3;A2BH06;D3YW69	60S ribosomal protein L11	0.150818	0.572017
Sorbs1	E9Q6A3;E9PYX6;E9QNA7;D3Z5J3;Q62417	Sorbin and SH3 domain-containing protein 1	0.657154	0.715005
Rps3a;Rps3a2;Rps3a3	P97351;D3Z6C3;D3Z7W7	40S ribosomal protein S3a	0.467517	1.06267
Tpm3	D3Z6I8;E9Q7Q3		0.060905	0.188475
Snx3	D3Z789;D3Z6Z0;Q78ZM0;O70492	Sorting nexin-3	0.0820298	0.219592
Sumo2	H7BWX9;D3Z794;P61957	Small ubiquitin-related modifier 2	-0.120519	0.232945
Ptges3	D3Z7C6;Q9R0Q7	Prostaglandin E synthase 3	-2.35712	2.13252	+
Gls	D3Z7P3;D3Z7P4	Glutaminase kidney isoform, mitochondrial	0.0570989	0.0329761
Pxmp2	D6REH1;Q5D073;P42925	Peroxisomal membrane protein 2	1.59505	1.22285	+
Echdc1	E0CXS3;Q9D9V3	Ethylmalonyl-CoA decarboxylase	0.53459	0.713262
Pcmt1	P23506;F7D432;E9PWE0;E0CYV0;F6TXE3;F6V9F1	Protein-L-isoaspartate(D-aspartate) O-methyltransferase;Protein-L-isoaspartate O-methyltransferase	0.230981	0.0539494
H3f3a;H3f3c;Hist1h3a	E0CZ27;P84244;P02301;F8WI35;P68433	Histone H3;Histone H3.3;Histone H3.3C;Histone H3.1	-0.260002	0.252419
Dnm1l	E9PUD2;Q8K1M6	Dynamin-1-like protein	0.0419898	0.079882
Cml1	G3UWY7;Q9JIZ0;E9PUL7	Probable N-acetyltransferase CML1	1.09396	0.771396
Tln2	E9PUM4;Q71LX4	Talin-2	-0.591481	1.02385
Atpif1	E9PV44;O35143	ATPase inhibitor, mitochondrial	-0.321488	0.169617
Eif4g1	E9PVC6;E9Q9E1;E9PVC5;Q6NZJ6;E9Q770	Eukaryotic translation initiation factor 4 gamma 1	-0.289523	0.200137
Gstm5	E9PVM7;P48774;E9PV63	Glutathione S-transferase Mu 5	-0.57895	2.12708
Myo6	E9Q175;E9PVU0;E9Q3L1;E9Q174;Q64331	Unconventional myosin-VI	0.0732274	0.167236
Gm4204;Nap1l1	J3QP68;P28656;E9PW66	Nucleosome assembly protein 1-like 1	-0.41179	0.18563
Psma4	E9PW69;Q9R1P0;E9Q0X0	Proteasome subunit alpha type;Proteasome subunit alpha type-4	-0.141787	0.0376501
Myl1;Myl3	E9PWG4;P05977;P09542	Myosin light chain 1/3, skeletal muscle isoform;Myosin light chain 3	-0.0892262	0.115162
Gcat	E9PWY6;O88986	2-amino-3-ketobutyrate coenzyme A ligase, mitochondrial	0.0735488	0.0358465
Farsa	E9PWY9;Q8C0C7	Phenylalanine--tRNA ligase alpha subunit	-0.293559	0.393779
Dab2	E9PX84;Q3TRE6;E9QL31;P98078;F6TQN9;Q9DCE6;E0CXT5	Disabled homolog 2	-0.300086	0.96964
Txndc5	E9PXX7;Q91W90	Thioredoxin domain-containing protein 5	-0.926052	0.754274
Hagh	E9PYA3;Q99KB8;G5E8T9;E9Q2H8	Hydroxyacylglutathione hydrolase, mitochondrial	0.0971088	0.118457
Rnpep	E9PYF1;Q8VCT3	Aminopeptidase B	-0.219556	0.812391
Usp14	E9PYI8;Q9JMA1	Ubiquitin carboxyl-terminal hydrolase;Ubiquitin carboxyl-terminal hydrolase 14	-0.241846	0.197757
Psap	E9PZ00;Q8BFQ1;K3W4L3;Q61207;J3QPG5	Sulfated glycoprotein 1	-0.265862	0.731336
Cp	G3X9T8;Q61147;G3X8Q5;E9PZD8	Ceruloplasmin	-0.818933	1.11894
Gm20390;Nme2	E9PZF0;Q01768	Nucleoside diphosphate kinase;Nucleoside diphosphate kinase B	0.208273	0.355772
Anp32e	E9Q5H2;E9PZF5;P97822	Acidic leucine-rich nuclear phosphoprotein 32 family member E	-1.3875	1.08983	+
Tf;Gm20425	Q921I1;E9Q035	Serotransferrin	-1.0759	1.77347	+
Tns1	E9Q0S6		-0.586514	1.99558
Hsph1	E9Q0U7;Q61699	Heat shock protein 105 kDa	0.455302	1.65846
Sept7	O55131;E9Q9F5;E9Q1G8	Septin-7	0.278081	0.171671
Khk	E9Q1Q9		0.182508	0.0334802
Atp11a	E9Q3G7;P98197;D6RII8	Probable phospholipid-transporting ATPase IH	1.26443	1.14158	+
Lrba	E9Q3Y4;Q9ESE1	Lipopolysaccharide-responsive and beige-like anchor protein	0.0124846	0.0422267
Tpm1	E9Q450;Q8BP43;E9Q448;S4R2U0		0.47189	0.219261
Ccdc58	E9Q4B5;F8WJI3;Q8R3Q6	Coiled-coil domain-containing protein 58	-0.056529	0.12192
Chchd6	E9Q4M4;Q91VN4	Coiled-coil-helix-coiled-coil-helix domain-containing protein 6, mitochondrial	-0.191624	1.0256
Igfbp7	Q61581;F8WH23;E9Q5D9	Insulin-like growth factor-binding protein 7	-1.60002	1.07028	+
Psmd13	E9Q5I9;Q9WVJ2	26S proteasome non-ATPase regulatory subunit 13	0.352032	0.136534
Ahnak	E9Q616		-0.512379	0.698697
Ttc7b	E9Q6P5		-1.66212	1.03481	+
Sec22b	E9Q6R3;O08547	Vesicle-trafficking protein SEC22b	0.10056	0.317858
Gm8991;Gm9242;Gm6793	E9Q7H5;J3QNY1;B2RXM2		-0.293389	1.02864
Cald1	Q8VCQ8;E9QA16;S4R1T7;E9Q0M9;D3Z6I7;E9QA15;E9Q9F3		-0.504026	0.797133
Rpl15;Gm10020;Gm8420	Q9CZM2;E9QAZ2;E9Q1X1	60S ribosomal protein L15;Ribosomal protein L15	1.05113	0.418866
Lyplal1	Q3UFF7;E9QLB2	Lysophospholipase-like protein 1	0.227257	0.679058
9030617O03Rik	Q8BH86;E9QMK9	UPF0317 protein C14orf159 homolog, mitochondrial	0.00877666	0.0379243
Eef1d	E9QN08;Q80T06;P57776;D3YUQ9;Q91VK2;D3YZT9;D3YY68	Elongation factor 1-delta	-0.134658	0.32475
Abhd14b	E9QN99;Q8VCR7	Alpha/beta hydrolase domain-containing protein 14B	0.19766	0.288458
Dhx9	O70133;E9QNN1	ATP-dependent RNA helicase A	-0.34693	1.42339
Pcx;Pc	G5E8R3;E9QPD7;Q05920	Pyruvate carboxylase;Pyruvate carboxylase, mitochondrial	0.286318	0.69345
Myh11	E9QPE7;O08638	Myosin-11	-0.587545	1.79707
Ndufs4	Q9CXZ1;E9QPX3	NADH dehydrogenase [ubiquinone] iron-sulfur protein 4, mitochondrial	-0.031775	0.0523397
Npepps	F6QYF8;Q11011;E9Q039;E9Q6F4;F7ANF4	Puromycin-sensitive aminopeptidase	-1.15413	0.67669
Ssb	F6SXM5;P32067	Lupus La protein homolog	-0.0479379	0.0807608
Ighg2c;Ighg;Igh-1a	P01864;F6TQW2;P01863;P01865	Ig gamma-2A chain C region secreted form;Ig gamma-2A chain C region, A allele;Ig gamma-2A chain C region, membrane-bound form	-1.84241	3.60776	+
Gm6576;Rps2;Gm5786;Gm18025;Gm5070;Gm6139;Gm8225	F6YTZ4;P25444;J3QMG5;D3YVC1;D3YWJ3;E9Q1N8;J3QM94;L7N453;L7N240;D3Z536	40S ribosomal protein S2	0.646767	0.59305
Rps18;Gm10260	P62270;F6YVP7;S4R1N6	40S ribosomal protein S18	0.564168	0.844776
Eif4g2	F7CBP1;G3XA17		0.164068	0.372912
Pxn	Q8VI36;F8VQ28	Paxillin	-0.40705	0.983646
Srp72	F8VQC1;E9Q740	Signal recognition particle subunit SRP72	0.423618	0.440519
Add1	F8WHZ9;F8WGR0;Q9QYC0;E9Q1K3	Alpha-adducin	-0.0432744	0.094671
Ahcyl2	F8WGT1;Q68FL4;E9PV16;F8WI65;H3BKT5	Adenosylhomocysteinase;Putative adenosylhomocysteinase 3	-0.226815	0.829579
Copa	Q8CIE6;F8WHL2	Coatomer subunit alpha;Xenin;Proxenin	0.0668087	0.0912685
Slirp	F8WHU8;Q9D8T7	SRA stem-loop-interacting RNA-binding protein, mitochondrial	0.121403	0.12371
Anxa6	F8WIT2;P14824	Annexin;Annexin A6	-0.348541	0.58337
Dnm2	Q3T9X3;Q3TCR7;P39054;G3X9G4;F8WIV5;G3UZZ3	Dynamin-2	-0.128188	0.253317
Hist1h2al;Hist2h2ac;Hist2h2aa1	F8WIX8;Q64523;Q6GSS7	Histone H2A;Histone H2A type 2-C;Histone H2A type 2-A	-1.29876	2.07109	+
Tra2b	F8WJG3;P62996	Transformer-2 protein homolog beta	0.233389	0.200681
St13	F8WJK8;Q99L47	Hsc70-interacting protein	0.0951486	0.187617
Hk1	G3UVV4;P17710	Hexokinase-1	0.0693698	0.0888964
Gbe1	G3UW30;Q9D6Y9;F6ZHD8	1,4-alpha-glucan-branching enzyme	-0.706817	0.816893
Pdzk1ip1	Q9CQH0;G3UW41	PDZK1-interacting protein 1	-0.128016	0.0286315
Slc3a2	P10852;G3UWA6	4F2 cell-surface antigen heavy chain	0.101321	0.192905
Bdh2	G3UWD3;Q8JZV9;F6UPJ1	3-hydroxybutyrate dehydrogenase type 2	-0.332188	1.10686
Rpl35;Gm10269	Q6ZWV7;G3UWD7	60S ribosomal protein L35	-0.17073	0.160141
Cycs;Gm10108	P62897;G3UWG1	Cytochrome c, somatic	0.41845	0.542143
Calu	G3UWV3;Q6XLQ8;O35887;G3UXA3;G3UY49;G3V004;G3UWR0	Calumenin	-0.315255	0.603676
Vdac2	G3UX26;Q60930;D3YZT5	Voltage-dependent anion-selective channel protein 2	0.0944571	0.218694
Psme1	G3UXZ5;P97371;G3UXY0;G3X9K9;G3UWN9	Proteasome activator complex subunit 1	-0.585169	1.22138
Rps28;Gm10263	G3UYV7;P62858;J3QNN8	40S ribosomal protein S28	0.0373297	0.0488876
Shmt1	G3UZ26;P50431;G3UYY1	Serine hydroxymethyltransferase;Serine hydroxymethyltransferase, cytosolic	0.0502043	0.124908
Syncrip	G3UZI2;G3V018;Q7TMK9;G3UXJ6;G3UZ48;G3UWM1	Heterogeneous nuclear ribonucleoprotein Q	-0.419451	1.02858
Ctsa	P16675;G3X8T3	Lysosomal protective protein;Lysosomal protective protein 32 kDa chain;Lysosomal protective protein 20 kDa chain	-0.377267	1.08523
Dnajc13	G3X922		-0.235429	0.107267
Plvap	G3X924;Q91VC4	Plasmalemma vesicle-associated protein	0.0520878	0.149115
Sec24c	G3X972		-0.139259	0.118323
Nccrp1	G3X9C2	F-box only protein 50	-0.610864	0.264448
Gm10250;Atp5h	G3X9L6;Q9DCX2;B1ASE2	ATP synthase subunit d, mitochondrial	0.0429182	0.0503506
Psme2	G3X9V0;P97372;E0CZ90	Proteasome activator complex subunit 2	0.193015	0.222648
Hnrnpd	G5E8G0;G3X9W0;F6ZV59		-0.461899	2.27945
Hnrnpu	G3XA10;Q8VEK3	Heterogeneous nuclear ribonucleoprotein U	-0.245388	0.68869
Akr1b10	G5E895;D3Z494		0.228179	0.348766
Ank3	G5E8K2;G5E8K3;G5E8K5;G3X971;S4R2F5;S4R236;S4R1S2;S4R2S8;S4R2K9;S4R1X7;S4R2C1;S4R187;S4R2J6;S4R165	Ankyrin-3	0.0863814	0.322048
Tpm1	G5E8R1;G5E8R0;E9Q455		0.0981359	0.223021
Slc25a3	Q8VEM8;G5E902	Phosphate carrier protein, mitochondrial	0.265892	0.847901
Hnrnpl	Q8R081;G5E924;G3UY38	Heterogeneous nuclear ribonucleoprotein L	-0.367359	0.563487
Gclm	H3BJA3;O09172;F6VNW5	Glutamate--cysteine ligase regulatory subunit	0.570509	1.2889
Esd	Q9R0P3;H3BKH6;H3BJP2;H3BLJ9;H3BJL6;H3BK43	S-formylglutathione hydrolase	0.151772	0.311919
Opa1	P58281;H7BX01;E0CXD1	Dynamin-like 120 kDa protein, mitochondrial;Dynamin-like 120 kDa protein, form S1	-0.573699	0.6244
Crat	H7BX88;P47934	Carnitine O-acetyltransferase	-0.0166602	0.0401769
Srsf1	Q6PDM2;H7BX95	Serine/arginine-rich splicing factor 1	-0.237545	0.682245
Rpl10	I7HLV2;Q6ZWV3	60S ribosomal protein L10	-0.205064	0.115683
Hnrnpa1;Gm7729	P49312;J3QK72;Q5EBP8	Heterogeneous nuclear ribonucleoprotein A1	-1.15439	2.3591	+
Vdac3	Q60931;J3QMG3	Voltage-dependent anion-selective channel protein 3	-1.0156	0.981293
Carkd	J3QN06;J3QMM7;Q9CZ42;K3W4M4;J3QPU6	ATP-dependent (S)-NAD(P)H-hydrate dehydratase	-0.0373354	0.0211898
Bsg	J3QP71;K3W4Q8;P18572	Basigin	0.238771	1.38252
Pbld1	Q9DCG6;K3W4L7	Phenazine biosynthesis-like domain-containing protein 1	0.0955658	0.197276
Myh14	Q6URW6;K3W4R2	Myosin-14	-0.317687	0.071961
Capn2	O08529	Calpain-2 catalytic subunit	-0.257061	0.561388
Dpysl2	O08553	Dihydropyrimidinase-related protein 2	-0.483943	2.80055
Alyref;Refbp2;Alyref2	O08583;Q9JJW6;G3X9I4	THO complex subunit 4;RNA and export factor-binding protein 2	-0.324484	0.436741
Endog	O08600	Endonuclease G, mitochondrial	-0.725575	0.680535
Dld	O08749	Dihydrolipoyl dehydrogenase, mitochondrial	0.00551748	0.0139745
Prkcsh	O08795	Glucosidase 2 subunit beta	-0.117738	0.445588
Atox1	O08997	Copper transport protein ATOX1	-1.22114	2.11106	+
Napsa	O09043	Napsin-A	1.06872	0.206264
Psmb1	O09061	Proteasome subunit beta type-1	-0.113005	0.103994
Ndufb11	O09111	NADH dehydrogenase [ubiquinone] 1 beta subcomplex subunit 11, mitochondrial	0.147817	0.0978584
Sypl1;Sypl	O09117;D6RFU9	Synaptophysin-like protein 1	0.167411	0.324185
Gsto1	O09131	Glutathione S-transferase omega-1	0.0389323	0.0443193
Smr2	O09133	Submaxillary gland androgen-regulated protein 2, isoform alpha	-0.141119	0.0927897
Hgd	O09173	Homogentisate 1,2-dioxygenase	0.0628324	0.0762643
Amacr	O09174	Alpha-methylacyl-CoA racemase	0.860393	2.47101
Phb2	O35129;F6QPR1	Prohibitin-2	0.258796	0.504966
Psmd4	O35226	26S proteasome non-ATPase regulatory subunit 4	0.241857	0.0913466
Dhx15	O35286	Putative pre-mRNA-splicing factor ATP-dependent RNA helicase DHX15	0.164512	0.0851428
Purb	O35295	Transcriptional activator protein Pur-beta	-0.0238271	0.0310426
Kpna4	O35343	Importin subunit alpha-4	-0.0616322	0.0507602
Exoc4	O35382;Q8C391;Q9CXE1	Exocyst complex component 4	0.108024	0.0532206
Phyh	O35386	Phytanoyl-CoA dioxygenase, peroxisomal	-1.7058	1.2708	+
Ech1	O35459;F7B227	Delta(3,5)-Delta(2,4)-dienoyl-CoA isomerase, mitochondrial	0.39681	0.446905
Slc27a2	O35488	Very long-chain acyl-CoA synthetase	0.541685	1.49384
Ap1b1	Q5SVG5;Q5SVG4;O35643	AP-1 complex subunit beta-1	-0.0362315	0.0876794
Hnrnph1	O35737;Q8C2Q7	Heterogeneous nuclear ribonucleoprotein H;Heterogeneous nuclear ribonucleoprotein H, N-terminally processed	-0.46566	2.81594
Bcat2	O35855;O88374;D3Z7C8	Branched-chain-amino-acid aminotransferase, mitochondrial;Branched-chain-amino-acid aminotransferase	-0.103682	0.188722
Timm44	O35857	Mitochondrial import inner membrane translocase subunit TIM44	0.31944	0.743883
Aldh1a7	O35945	Aldehyde dehydrogenase, cytosolic 1	-1.04539	1.59419	+
Ptrf	O54724	Polymerase I and transcript release factor	-0.90516	1.1
Ddost	O54734	Dolichyl-diphosphooligosaccharide--protein glycosyltransferase 48 kDa subunit	0.140677	0.366557
Cyp2j5	O54749	Cytochrome P450 2J5	-0.139495	0.149135
Bckdk	O55028	[3-methyl-2-oxobutanoate dehydrogenase [lipoamide]] kinase, mitochondrial	0.0694389	0.157744
Copb2	O55029	Coatomer subunit beta	-0.194052	1.00941
Tpmt	O55060;D3Z217;D3YWK6;D3Z380;D6RIK3;D3Z0R1	Thiopurine S-methyltransferase	-0.390707	0.583252
Nipsnap1	O55125;Q5SVG6	Protein NipSnap homolog 1	0.27493	0.32299
Gbas	Q7TMG8;O55126	Protein NipSnap homolog 2	-0.468702	0.298538
Acot1	O55137	Acyl-coenzyme A thioesterase 1	0.535763	1.8256
Rpl35a	O55142	60S ribosomal protein L35a	0.253089	0.524411
Atp2a2	O55143;J3KMM5	Sarcoplasmic/endoplasmic reticulum calcium ATPase 2	-0.0513754	0.135251
Ilk	O55222	Integrin-linked protein kinase	-0.114176	0.0811257
Psmb5	O55234	Proteasome subunit beta type-5	0.0591321	0.167884
Eif3d	O70194	Eukaryotic translation initiation factor 3 subunit D	0.0806942	0.0685592
Pgam2	O70250	Phosphoglycerate mutase 2	0.228766	0.308068
Eef1b;Eef1b2	O70251;G3UX43;G3UZ47	Elongation factor 1-beta	-0.760185	0.397383
Nmt1	O70310	Glycylpeptide N-tetradecanoyltransferase 1	-0.348559	0.275821
Gpx4	O70325;Q76LV0;S4R1E5;Q91XR9	Phospholipid hydroperoxide glutathione peroxidase, mitochondrial;Glutathione peroxidase;Phospholipid hydroperoxide glutathione peroxidase, nuclear	0.0666547	0.159107
Vamp8	O70404	Vesicle-associated membrane protein 8	0.199344	0.463522
Psma3	O70435	Proteasome subunit alpha type-3	1.09861	0.833423
Stx7	Q8BH40;O70439	Syntaxin-7	0.104771	0.370406
Ugdh	O70475;D3Z3F7	UDP-glucose 6-dehydrogenase	0.246716	0.406213
Slc22a2	O70577	Solute carrier family 22 member 2	0.461283	0.231508
Pfdn2	O70591	Prefoldin subunit 2	-0.204177	0.144211
Cdh16	O88338	Cadherin-16	0.427331	1.06295
Wdr1	O88342	WD repeat-containing protein 1	-0.201432	0.274363
Papss2	O88428	Bifunctional 3-phosphoadenosine 5-phosphosulfate synthase 2;Sulfate adenylyltransferase;Adenylyl-sulfate kinase	-0.16694	0.698435
Mtx2	O88441	Metaxin-2	0.263988	0.24455
Ddc	O88533	Aromatic-L-amino-acid decarboxylase	0.214421	0.453316
Cops3	O88543	COP9 signalosome complex subunit 3	-0.361535	1.41236
Hnrnpa2b1	O88569	Heterogeneous nuclear ribonucleoproteins A2/B1	-0.0385056	0.0930122
Comt	O88587	Catechol O-methyltransferase	-0.327997	0.194643
Clpp	O88696	Putative ATP-dependent Clp protease proteolytic subunit, mitochondrial	0.162529	0.327334
Idh1	O88844	Isocitrate dehydrogenase [NADP] cytoplasmic	0.00125217	0.0026178
Rbbp9	O88851	Putative hydrolase RBBP9	-0.543682	0.619874
Gnpda1	O88958;D3Z0R5	Glucosamine-6-phosphate isomerase 1	0.569074	0.836038
Lgmn	O89017	Legumain	-0.166043	0.44872
Tpp1	O89023	Tripeptidyl-peptidase 1	0.286019	0.278943
Coro1a	O89053;G3UYK8	Coronin-1A;Coronin	-1.25439	1.84107	+
Rbm3	O89086;Q8BG13;S4R2M6	Putative RNA-binding protein 3	-0.089128	0.029492
Adh1	P00329	Alcohol dehydrogenase 1	0.0624657	0.191596
Dhfr	P00375	Dihydrofolate reductase	0.212047	0.421618
mt-Co2;Mtco2	Q7JCZ1;P00405	Cytochrome c oxidase subunit 2	-0.517946	0.232091
mt-Co3;Mtco3	Q7JCX7;P00416	Cytochrome c oxidase subunit 3	0.925942	0.462025
Ren2;Ren1	P00796;P06281	Renin-2;Renin-2 heavy chain;Renin-2 light chain;Renin-1	0.824975	1.35889
Ca2	P00920	Carbonic anhydrase 2	0.759645	1.68298
C3	P01027	Complement C3;Complement C3 beta chain;Complement C3 alpha chain;C3a anaphylatoxin;Acylation stimulating protein;Complement C3b alpha chain;Complement C3c alpha chain fragment 1;Complement C3dg fragment;Complement C3g fragment;Complement C3d fragment;Complement C3f fragment;Complement C3c alpha chain fragment 2	-1.09131	0.875618
	P01837	Ig kappa chain C region	-3.1416	3.23152	+
Igh-6	P01872	Ig mu chain C region secreted form	-3.21817	1.91471	+
B2m	P01887	Beta-2-microglobulin	0.946658	0.759467
mt-Nd4;Mtnd4	Q7JCY6;P03911	NADH-ubiquinone oxidoreductase chain 4	1.23124	0.376021
Fabp4	P04117	Fatty acid-binding protein, adipocyte	-0.871163	0.74115
Mup3;Mup21	Q3KQQ2;P04939;Q80YX8	Major urinary protein 3	-0.712474	0.456722
Aldoa;Aldoart1	P05064;A6ZI44;D3YWI1;D3Z510;D3YV98;Q9CPQ9;A6ZI46	Fructose-bisphosphate aldolase A;Fructose-bisphosphate aldolase	-0.112651	0.331894
Got1	P05201	Aspartate aminotransferase, cytoplasmic	-0.0175653	0.0127584
Got2	P05202	Aspartate aminotransferase, mitochondrial	-0.263813	0.143978
Ldha	P06151;G5E8N5;D3Z736;D3YZQ9	L-lactate dehydrogenase A chain;L-lactate dehydrogenase	0.0913935	0.247836
Gpi;Gm1840	P06745;F6SAC3	Glucose-6-phosphate isomerase	-0.135825	0.524434
Me1	P06801	NADP-dependent malic enzyme	0.305892	1.02738
Anxa2	P07356;B0V2N7;B0V2N8;B0V2N5	Annexin A2	-0.290926	0.660954
Alb	P07724	Serum albumin	-1.6339	3.54829	+
Serpina3k	P07759	Serine protease inhibitor A3K	-0.825693	1.38464
Hsp90aa1	P07901	Heat shock protein HSP 90-alpha	0.369156	1.49553
Pdia4	P08003	Protein disulfide-isomerase A4	0.204164	0.419957
Aprt	P08030	Adenine phosphoribosyltransferase	0.0610704	0.0268634
Hsp90b1	P08113;F7C312	Endoplasmin	0.0997305	0.261699
S100a10	P08207	Protein S100-A10	-0.672596	0.406081
Apoe	P08226	Apolipoprotein E	-1.04483	1.40997	+
Sod1	P08228	Superoxide dismutase [Cu-Zn]	0.481658	0.426048
Mdh2	P08249	Malate dehydrogenase, mitochondrial	-0.171547	0.353496
Gnai2	P08752	Guanine nucleotide-binding protein G(i) subunit alpha-2	-0.453066	0.278171
Lyz2	P08905	Lysozyme C-2	0.0371685	0.0309621
Spink3	P09036	Serine protease inhibitor Kazal-type 3	-0.974339	1.76177	+
Itgb1	P09055	Integrin beta-1	-0.142019	0.104791
P4hb	P09103	Protein disulfide-isomerase	0.143006	0.478607
Alpl	P09242;E9Q7P8;B1AXF5	Alkaline phosphatase, tissue-nonspecific isozyme;Alkaline phosphatase	1.3302	1.05839	+
Ncl	P09405	Nucleolin	-0.0067749	0.0409309
Pgk1	P09411;S4R2M7	Phosphoglycerate kinase 1	-0.10385	0.330857
Sod2	P09671	Superoxide dismutase [Mn], mitochondrial	0.318995	0.842774
Apoa2	P09813	Apolipoprotein A-II	-0.824056	0.972997
H2afv;H2afz	Q3THW5;P0C0S6;Q8R029	Histone H2A.V;Histone H2A.Z;Histone H2A	-0.0800052	0.0296829
Eef1a1	P10126;D3YZ68;D3Z3I8	Elongation factor 1-alpha 1	-0.0148468	0.0321838
Alad	P10518	Delta-aminolevulinic acid dehydratase	-0.583915	0.439646
Ctsb	P10605	Cathepsin B;Cathepsin B light chain;Cathepsin B heavy chain	-0.329208	1.04349
Eif4a2	P10630;Q8BTU6;E9Q561	Eukaryotic initiation factor 4A-II	0.593496	1.81505
Txn	P10639	Thioredoxin	-0.0445523	0.0988201
Gstm1	P10649;A2AE89;F6WHQ7	Glutathione S-transferase Mu 1	0.090097	0.121675
Hist1h2bp;Hist1h2bk;Hist1h2bc;Hist2h2bb;Hist1h2bh;Hist1h2bb;Hist1h2bm;Hist1h2bf;Gm13646;Hist3h2ba;Hist3h2bb;Hist2h2be;Hist1h2ba	Q8CGP2;Q8CGP1;Q6ZWY9;Q64525;Q64478;Q64475;P10854;P10853;Q8CBB6;G3X9D5;Q9D2U9;Q8CGP0;Q64524;P70696	Histone H2B type 1-P;Histone H2B type 1-K;Histone H2B type 1-C/E/G;Histone H2B type 2-B;Histone H2B type 1-H;Histone H2B type 1-B;Histone H2B type 1-M;Histone H2B type 1-F/J/L;Histone H2B;Histone H2B type 3-A;Histone H2B type 3-B;Histone H2B type 2-E;Histone H2B type 1-A	0.240877	0.118866
H1f0	P10922	Histone H1.0	-0.349472	0.259159
Gpx1	P11352	Glutathione peroxidase 1	-0.426595	0.174918
Lamp1	P11438	Lysosome-associated membrane glycoprotein 1	-0.937615	0.630499
Hsp90ab1	P11499	Heat shock protein HSP 90-beta	0.164481	1.12058
Krt8	P11679	Keratin, type II cytoskeletal 8	-0.733145	0.661821
Gas2	P11862;D3YWD9;D3Z503	Growth arrest-specific protein 2	-0.316842	2.28921
Nudt19	P11930	Nucleoside diphosphate-linked moiety X motif 19, mitochondrial	0.992735	2.39644	+
Tcp1	P11983	T-complex protein 1 subunit alpha	0.0711284	0.200904
Prkar2a	P12367;Q8K1M3	cAMP-dependent protein kinase type II-alpha regulatory subunit	0.423856	0.361721
Pfkl	P12382	6-phosphofructokinase, liver type	1.24911	0.792971
Calb1	P12658	Calbindin	0.426995	0.443471
Cox5a	P12787	Cytochrome c oxidase subunit 5A, mitochondrial	0.787817	0.895439
Gsn	P13020	Gelsolin	-0.234034	0.657423
Gpd1	P13707;E0CXN5	Glycerol-3-phosphate dehydrogenase [NAD(+)], cytoplasmic	0.251345	0.610701
Atp1b1	P14094	Sodium/potassium-transporting ATPase subunit beta-1	0.294779	0.512426
Rpl27a	P14115	60S ribosomal protein L27a	0.0463219	0.0417141
Rps16	P14131	40S ribosomal protein S16	0.158924	0.305821
Rpl7	P14148;F6XI62	60S ribosomal protein L7	0.50611	0.541967
Mdh1	P14152	Malate dehydrogenase, cytoplasmic	0.00516129	0.0110451
Rpsa	P14206	40S ribosomal protein SA	-0.336591	0.481361
Calr	P14211	Calreticulin	-0.235582	0.47206
Psmd3	P14685	26S proteasome non-ATPase regulatory subunit 3	-0.379895	1.18133
Lmnb1	P14733	Lamin-B1	-0.114881	0.345308
Rplp0;Gm8730	P14869;E9Q070;S4R1N1;D3YVM5	60S acidic ribosomal protein P0	-0.0602727	0.401042
Glul	P15105	Glutamine synthetase	0.0549808	0.076343
Cyp2a4;Cyp2a5	P15392;Q91X75;P20852	Cytochrome P450 2A4;Cytochrome P450 2A5	-0.456517	0.323479
Nme1	P15532;Q5NC80;Q5NC79	Nucleoside diphosphate kinase A	-0.0763469	0.197208
Gstm2	P15626;D3YX76	Glutathione S-transferase Mu 2	-0.291566	0.601967
Hist1h1c	P15864	Histone H1.2	-0.582369	0.324167
Ca3	P16015	Carbonic anhydrase 3	-0.683781	0.518395
Lgals1	P16045	Galectin-1	-0.233796	0.352682
Ldhb	P16125;D3Z7F0	L-lactate dehydrogenase B chain;L-lactate dehydrogenase	0.188422	0.352372
Pah	P16331	Phenylalanine-4-hydroxylase	-0.0013938	0.00351053
Mut	P16332	Methylmalonyl-CoA mutase, mitochondrial	0.111568	0.241733
Enpep	P16406;F7B9G4	Glutamyl aminopeptidase	-0.298061	0.262559
Ass1;Gm5424	P16460;J3QNG0	Argininosuccinate synthase	0.0597506	0.167785
Sptan1	P16546;A3KGU7	Spectrin alpha chain, non-erythrocytic 1	0.0148659	0.0481217
Gapdh;Gm7293	P16858;S4R1W1;S4R257;D3YYI5	Glyceraldehyde-3-phosphate dehydrogenase	0.07586	0.326777
Eno1	P17182;Q6PHC1	Alpha-enolase;Enolase	-0.1008	0.371566
Ap2a2	P17427	AP-2 complex subunit alpha-2	-0.0380864	0.0788401
Selenbp1;Selenbp2	P17563;Q63836;G3UYY2	Selenium-binding protein 1;Selenium-binding protein 2	-0.0620141	0.172416
Cox7c;Gm20091	P17665;J3QNB4	Cytochrome c oxidase subunit 7C, mitochondrial	0.010643	0.00310291
Ppia	P17742	Peptidyl-prolyl cis-trans isomerase A	-0.418037	1.57352
Tpi1	P17751;H7BXC3	Triosephosphate isomerase	-0.0867567	0.259207
Hspa1a;Hspa1b	Q61696;P17879	Heat shock 70 kDa protein 1A;Heat shock 70 kDa protein 1B	0.381272	0.539766
Ctsd	P18242;F6Y6L6;F8WIR1	Cathepsin D	-0.440131	1.16835
Svs4	P18419	Seminal vesicle secretory protein 4	-3.87866	1.53299	+
Cfl1	P18760;F8WGL3	Cofilin-1	-0.481757	1.57639
Dao	P18894;Q91WH3	D-amino-acid oxidase	0.413886	0.705407
Fasn	P19096	Fatty acid synthase;[Acyl-carrier-protein] S-acetyltransferase;[Acyl-carrier-protein] S-malonyltransferase;3-oxoacyl-[acyl-carrier-protein] synthase;3-oxoacyl-[acyl-carrier-protein] reductase;3-hydroxyacyl-[acyl-carrier-protein] dehydratase;Enoyl-[acyl-carrier-protein] reductase;Oleoyl-[acyl-carrier-protein] hydrolase	-0.382043	0.180269
Gstp1;Gstp2	P19157;P46425	Glutathione S-transferase P 1;Glutathione S-transferase P 2	-0.0819721	0.111629
Rpl13a	P19253;S4R281;E9Q5A0	60S ribosomal protein L13a	0.596635	1.1018
Serpinh1	P19324	Serpin H1	-0.12927	0.409383
Cox5b	P19536;Q9D881	Cytochrome c oxidase subunit 5B, mitochondrial	0.446567	1.14909
Cox4i1	P19783	Cytochrome c oxidase subunit 4 isoform 1, mitochondrial	0.742364	2.00849
Hspa5	P20029	78 kDa glucose-regulated protein	0.163181	0.527166
Hexb	P20060	Beta-hexosaminidase subunit beta	0.0190797	0.0147103
Tmsb4x	P20065	Thymosin beta-4;Hematopoietic system regulatory peptide	-0.608578	0.745504
Prdx3	P20108	Thioredoxin-dependent peroxide reductase, mitochondrial	0.19765	1.06968
Vim	P20152	Vimentin	-0.974151	3.06778	+
Gc	P21614	Vitamin D-binding protein	-1.04235	1.65804	+
Lmnb2	P21619	Lamin-B2	-0.638303	1.53833
Tgm2	P21981	Protein-glutamine gamma-glutamyltransferase 2	-0.382789	1.56649
Fech	P22315;Q544X6	Ferrochelatase, mitochondrial;Ferrochelatase	0.351867	0.184142
Hist1h2ah;H2afj;Hist1h2ak;Hist1h2af;Hist3h2a;Hist1h2ab;Hist1h2aa	Q8CGP6;Q8R1M2;Q8CGP7;Q8CGP5;Q8BFU2;P22752;Q8CGP4	Histone H2A type 1-H;Histone H2A.J;Histone H2A type 1-K;Histone H2A type 1-F;Histone H2A type 3;Histone H2A type 1;Histone H2A	-0.574935	0.684676
Ap1g1	P22892;Q8CBB7	AP-1 complex subunit gamma-1	1.08132	0.560112
Eif3a	P23116	Eukaryotic translation initiation factor 3 subunit A	0.0667324	0.13487
Cbx3	Q9DCC5;P23198	Chromobox protein homolog 3	0.455464	0.52283
Pnp	Q543K9;P23492	Purine nucleoside phosphorylase	-0.0235281	0.0264257
Cat	P24270	Catalase	0.763777	1.63896
Ppib	P24369	Peptidyl-prolyl cis-trans isomerase B	1.54415	0.656457
Gsta4	P24472	Glutathione S-transferase A4	0.0721793	0.108373
Lta4h	P24527	Leukotriene A-4 hydrolase	-0.382959	1.58467
Aldh1a1	P24549	Retinal dehydrogenase 1	-2.65779	1.39139	+
M6pr	P24668	Cation-dependent mannose-6-phosphate receptor	-0.427365	0.481646
Tln1	P26039	Talin-1	-0.319263	0.972793
Ezr	P26040	Ezrin	0.12162	1.112
Msn	P26041	Moesin	-0.447435	2.1041
Rdx	P26043	Radixin	-0.166309	0.411474
Ctnna1	P26231	Catenin alpha-1	-0.0182829	0.052631
Ptma	P26350	Prothymosin alpha;Thymosin alpha	-0.352248	0.40005
Glud1	P26443	Glutamate dehydrogenase 1, mitochondrial	0.111514	0.465456
Psmd7	P26516	26S proteasome non-ATPase regulatory subunit 7	0.954022	1.49528
Sars	P26638;Q8C483;A2AFS0	Serine--tRNA ligase, cytoplasmic	-0.430947	1.32663
Marcks	P26645	Myristoylated alanine-rich C-kinase substrate	-0.255545	1.31088
Fkbp1a	P26883	Peptidyl-prolyl cis-trans isomerase FKBP1A	-0.478773	0.817657
Rpl3	P27659	60S ribosomal protein L3	0.794463	2.5298
H2afx	P27661	Histone H2A.x	-0.184135	0.0510857
Pdia3	P27773	Protein disulfide-isomerase A3	-0.0281186	0.0712104
Aco1	P28271	Cytoplasmic aconitate hydratase	0.208858	0.69884
Adh5	P28474	Alcohol dehydrogenase class-3	-0.422307	0.677512
Bgn	P28653	Biglycan	-0.266664	0.404583
Marcksl1	P28667	MARCKS-related protein	0.183352	0.105497
Mep1a	P28825	Meprin A subunit alpha	0.218723	0.290151
Pabpc1	P29341	Polyadenylate-binding protein 1	-0.0999231	0.496256
Nedd8	P29595	NEDD8	-0.109746	0.115349
Ahsg	P29699	Alpha-2-HS-glycoprotein	-1.00543	2.12302	+
Oat	P29758	Ornithine aminotransferase, mitochondrial	-0.0266266	0.0660386
Gsta3	P30115	Glutathione S-transferase A3	-0.660776	0.775848
Ckmt1	P30275;A2ARP5	Creatine kinase U-type, mitochondrial	0.387773	0.753067
Fkbp4	P30416;F6S2D5;F7CAT1;D6RDE2	Peptidyl-prolyl cis-trans isomerase FKBP4;Peptidyl-prolyl cis-trans isomerase FKBP4, N-terminally processed;Peptidyl-prolyl cis-trans isomerase	0.333272	0.547226
Svs5	P30933	Seminal vesicle secretory protein 5	-3.52622	1.21391	+
Des	P31001	Desmin	-0.894254	1.67348
Dpep1	P31428	Dipeptidase 1	0.0164475	0.0169534
Dbi	P31786;F6WUQ1;Q4VWZ5;D3Z563	Acyl-CoA-binding protein	-0.515564	0.849429
Scp2	P32020	Non-specific lipid-transfer protein	0.325092	0.501558
Serpinc1	P32261	Antithrombin-III	-0.287727	0.607427
Ranbp1	P34022;H7BX22	Ran-specific GTPase-activating protein	-0.436461	0.487436
Mif	P34884	Macrophage migration inhibitory factor	0.154341	0.103787
Ephx2	P34914	Bifunctional epoxide hydrolase 2;Cytosolic epoxide hydrolase 2;Lipid-phosphate phosphatase	0.328587	0.832299
Rab5c	P35278;Q8C266	Ras-related protein Rab-5C	-0.243937	0.917785
Rab6b;Rab6a;Rab39a	P61294;P35279;D3YV69;Q8BHD0	Ras-related protein Rab-6B;Ras-related protein Rab-6A;Ras-related protein Rab-39A	0.33735	0.456204
Rab18	P35293	Ras-related protein Rab-18	-0.12956	0.0757765
Pdha1	P35486	Pyruvate dehydrogenase E1 component subunit alpha, somatic form, mitochondrial	0.17837	0.65402
Fah	P35505	Fumarylacetoacetase	0.275772	0.775376
Canx	P35564	Calnexin	0.165158	0.388495
G6pc	P35576	Glucose-6-phosphatase	0.986399	1.98846	+
Prdx1	P35700;B1AXW5;B1AXW6;B1AXW4	Peroxiredoxin-1	0.0546718	0.116841
Cd81	P35762	CD81 antigen	-0.832955	0.481698
Rpl12	P35979	60S ribosomal protein L12	-0.0462074	0.0938801
Rpl18	P35980;G3UZJ6	60S ribosomal protein L18	0.43363	0.671127
Cpox	P36552	Coproporphyrinogen-III oxidase, mitochondrial	0.491547	0.632369
Por	P37040;Q05DV1	NADPH--cytochrome P450 reductase	0.342352	0.958457
Tagln	P37804	Transgelin	-0.907876	1.17364
Hmgcl	P38060	Hydroxymethylglutaryl-CoA lyase, mitochondrial	0.209193	0.522431
Hspa9	P38647	Stress-70 protein, mitochondrial	0.0508437	0.19018
Cap1	P40124	Adenylyl cyclase-associated protein 1	-0.357632	1.63953
Tkt	P40142	Transketolase	-0.0458479	0.121559
Vps26a	P40336	Vacuolar protein sorting-associated protein 26A	-0.0832319	0.143984
Inmt	P40936	Indolethylamine N-methyltransferase	0.196504	0.239538
Rpl28	P41105	60S ribosomal protein L28	0.428502	0.587437
Eci1	P42125	Enoyl-CoA delta isomerase 1, mitochondrial	0.254587	0.209518
Sept2	P42208;E9Q3V6;F6WYM0;D3YYB1;D3Z3C0	Septin-2	-0.232138	0.0716337
Stat1	Q8C3V4;P42225	Signal transducer and activator of transcription 1	-0.367863	0.40043
Pura	P42669	Transcriptional activator protein Pur-alpha	-0.0562835	0.0276428
Cct8	P42932;H3BL49	T-complex protein 1 subunit theta	0.0543995	0.129476
Cox6a1	P43024;Q9DCW5	Cytochrome c oxidase subunit 6A1, mitochondrial;Cytochrome c oxidase subunit 6A, mitochondrial	0.117685	0.0618242
Hist1h1e	P43274	Histone H1.4	-0.235585	0.216819
Hist1h1b	P43276	Histone H1.5	-0.136105	0.0793066
Akr1b1;Akr1b3	P45376;D3YVJ7	Aldose reductase	-0.264783	0.290295
Cfl2	P45591	Cofilin-2	0.249334	1.11399
Acadm	P45952	Medium-chain specific acyl-CoA dehydrogenase, mitochondrial	0.430333	2.44833
Nsf	P46460	Vesicle-fusing ATPase	-0.163681	0.418162
Psmc2	P46471;Q8BVQ9	26S protease regulatory subunit 7	-0.0527573	0.0996398
Fdx1	P46656	Adrenodoxin, mitochondrial	-0.870866	0.636111
Adss	P46664	Adenylosuccinate synthetase isozyme 2	-0.60422	0.620416
Cryz	P47199;V9GXY8	Quinone oxidoreductase	-0.271482	1.32099
Aldh2	P47738	Aldehyde dehydrogenase, mitochondrial	-0.403094	1.30783
Capza1	Q5RKN9;P47753	F-actin-capping protein subunit alpha-1	-0.463603	0.366772
Capza2	P47754;D6RCW7	F-actin-capping protein subunit alpha-2	-0.238489	0.361141
Capzb	P47757;F6QJN8;F6YHZ8	F-actin-capping protein subunit beta	-0.544712	0.889647
Rpl6;Gm5428	P47911;E9PUX4	60S ribosomal protein L6	0.0729685	0.11638
Rplp1	P47955	60S acidic ribosomal protein P1	-0.350898	0.216794
Rpl5	P47962;D3YYV8	60S ribosomal protein L5	0.214199	0.44144
Rpl13	P47963	60S ribosomal protein L13	0.644886	0.679897
Eif1	P48024	Eukaryotic translation initiation factor 1	-0.357521	1.25175
Anxa5	P48036	Annexin A5	-0.32463	1.6512
Lmna	P48678	Prelamin-A/C;Lamin-A/C	-0.530229	1.38564
Cbr1	P48758	Carbonyl reductase [NADPH] 1	-0.137165	0.319086
Cox7a2	P48771	Cytochrome c oxidase subunit 7A2, mitochondrial	0.140336	0.159753
Slc25a4	P48962	ADP/ATP translocase 1	0.2727	0.387811
Psma2	P49722	Proteasome subunit alpha type-2	0.0327649	0.0691746
Ctsh	P49935	Pro-cathepsin H;Cathepsin H mini chain;Cathepsin H;Cathepsin H heavy chain;Cathepsin H light chain	0.389851	0.642318
Bckdha	P50136;Q3U3J1	2-oxoisovalerate dehydrogenase subunit alpha, mitochondrial	0.0382943	0.0626189
Hsd17b8;H2-Ke6	P50171;G3UX44	Estradiol 17-beta-dehydrogenase 8	0.116213	0.107728
Ahcy	P50247	Adenosylhomocysteinase	0.180182	0.266445
Fmo1	P50285;Q3UNX7	Dimethylaniline monooxygenase [N-oxide-forming] 1	0.489773	1.85807
Gdi1	P50396	Rab GDP dissociation inhibitor alpha	-0.138976	0.47471
Atp6v1a	P50516	V-type proton ATPase catalytic subunit A	0.302107	1.09136
Atp6v1e1	P50518	V-type proton ATPase subunit E 1	0.0177412	0.0382687
S100a11	P50543	Protein S100-A11	-0.704927	1.96655
Acadvl	P50544;B1AR28	Very long-chain specific acyl-CoA dehydrogenase, mitochondrial	0.112038	0.38971
Pa2g4	P50580;D3YVH7	Proliferation-associated protein 2G4	-0.196412	0.934074
Rab7a	P51150	Ras-related protein Rab-7a	0.10315	0.314623
Acadl	P51174	Long-chain specific acyl-CoA dehydrogenase, mitochondrial	-0.145772	1.23229
Rpl9	P51410;D3Z629	60S ribosomal protein L9	0.0714121	0.0711552
Hsd17b4	P51660	Peroxisomal multifunctional enzyme type 2;(3R)-hydroxyacyl-CoA dehydrogenase;Enoyl-CoA hydratase 2	0.633472	1.27601
Hsd11b2	P51661	Corticosteroid 11-beta-dehydrogenase isozyme 2	-0.356616	0.479778
Gss	P51855;Q3UEE2;A2AQN9;A2AQN7	Glutathione synthetase	0.255636	1.26791
Hdgf	P51859;E0CYW7;E0CXA0	Hepatoma-derived growth factor	0.0261598	0.041746
Atp6v0d1	P51863	V-type proton ATPase subunit d 1	-0.053772	0.0661456
Slc25a5	P51881	ADP/ATP translocase 2	0.377887	2.24925
Lum	P51885	Lumican	-1.79186	0.95567	+
Tst	P52196	Thiosulfate sulfurtransferase	-0.105078	0.196187
Usp10	P52479	Ubiquitin carboxyl-terminal hydrolase 10	0.0173154	0.0090581
Pkm	P52480	Pyruvate kinase isozymes M1/M2	-0.0302067	0.0358925
Ndufs6	P52503	NADH dehydrogenase [ubiquinone] iron-sulfur protein 6, mitochondrial	-0.165316	0.459245
Hrsp12	P52760	Ribonuclease UK114	-0.0172343	0.0368441
Cpt2	P52825	Carnitine O-palmitoyltransferase 2, mitochondrial	-0.157527	1.74839
Dbt	P53395	Lipoamide acyltransferase component of branched-chain alpha-keto acid dehydrogenase complex, mitochondrial	0.00565338	0.0241564
Rab2a	P53994	Ras-related protein Rab-2A	-0.508952	0.342967
Idh2	P54071	Isocitrate dehydrogenase [NADP], mitochondrial	0.0937147	0.282672
Psmc4	P54775	26S protease regulatory subunit 6B	-0.120632	0.19695
Adsl	P54822;E9Q0A0;E9Q3T7;E9Q242	Adenylosuccinate lyase	-0.157796	0.180432
Abcd3	P55096	ATP-binding cassette sub-family D member 3	0.480567	0.848212
Rab8a	P55258	Ras-related protein Rab-8A	0.0741243	0.262556
Adk	P55264	Adenosine kinase	-0.117651	0.277765
Lrpap1	P55302;F6WMD1	Alpha-2-macroglobulin receptor-associated protein	0.296833	0.97966
Atp5j2	P56135;F8WHP8	ATP synthase subunit f, mitochondrial	-1.33233	0.426301
Atp5e	P56382	ATP synthase subunit epsilon, mitochondrial	0.349316	0.10521
Cda	P56389	Cytidine deaminase	0.0167542	0.025849
Cox6b1	P56391	Cytochrome c oxidase subunit 6B1	0.401814	0.506249
Cox17	P56394	Cytochrome c oxidase copper chaperone	-0.261919	0.402013
Cyb5a;Cyb5	P56395;G5E850;E0CY88	Cytochrome b5	0.290157	0.98003
Usp5	Q3U4W8;P56399	Ubiquitin carboxyl-terminal hydrolase;Ubiquitin carboxyl-terminal hydrolase 5	-0.112816	0.358976
Atp5b	P56480	ATP synthase subunit beta, mitochondrial	0.187242	1.07746
Pdcd5	P56812	Programmed cell death protein 5	-0.150292	0.0842862
Lad1	P57016	Ladinin-1	-0.459452	0.729885
Atp6v1d	P57746	V-type proton ATPase subunit D	0.445507	1.06173
Erp29	P57759	Endoplasmic reticulum resident protein 29	0.556145	1.22075
Actn4	P57780;E9Q2W9	Alpha-actinin-4	-0.386718	2.05195
Eef2	P58252	Elongation factor 2	0.160398	0.375942
Slc12a3	P59158	Solute carrier family 12 member 3	0.410421	0.283328
Arpc4	P59999;E9PWA7	Actin-related protein 2/3 complex subunit 4	0.107045	0.12744
Eif3e	P60229	Eukaryotic translation initiation factor 3 subunit E	0.45255	0.530843
Pcbp1	P60335	Poly(rC)-binding protein 1	-0.633776	1.22204
Cdc42	P60766	Cell division control protein 42 homolog	0.164396	0.27258
Eif4a1	P60843	Eukaryotic initiation factor 4A-I	-0.123296	0.417989
Rps20	P60867	40S ribosomal protein S20	0.149372	0.391461
Rab10	P61027	Ras-related protein Rab-10	-0.0683026	0.0675798
Ube2n	P61089	Ubiquitin-conjugating enzyme E2 N	-0.0711393	0.0892094
Kap	P61110	Kidney androgen-regulated protein	0.00741911	0.00195963
Actr2	P61161	Actin-related protein 2	0.234815	0.704213
Actr1a	P61164	Alpha-centractin	-0.964798	0.702055
Arf1;Arf3;Arf2	P84078;P61205;Q8BSL7	ADP-ribosylation factor 1;ADP-ribosylation factor 3;ADP-ribosylation factor 2	-0.226173	0.50514
Arl1	P61211;F8WIB1	ADP-ribosylation factor-like protein 1	-1.37542	0.594219
Rpl26	P61255;B1ARA3;B1ARA5	60S ribosomal protein L26	0.0965996	0.916241
Magoh;Magohb	P61327;G3UZW7;G3UYI5;Q9CQL1	Protein mago nashi homolog;Protein mago nashi homolog 2	-0.0260172	0.0133073
Rpl27;Gm4825	P61358;A2A4Q0;E9PV49	60S ribosomal protein L27	-0.200705	0.213198
Rpl37a	P61514	60S ribosomal protein L37a	0.0147676	0.011562
Sec61a1	P61620	Protein transport protein Sec61 subunit alpha isoform 1	0.0493054	0.0595762
Arf4	P61750;E9Q798	ADP-ribosylation factor 4	0.253833	0.360207
Dad1	P61804	Dolichyl-diphosphooligosaccharide--protein glycosyltransferase subunit DAD1	-1.30059	0.776824
Abat	P61922	4-aminobutyrate aminotransferase, mitochondrial	-0.00807619	0.0238105
Copz1	P61924	Coatomer subunit zeta-1	-0.877591	0.628739
Nutf2	P61971	Nuclear transport factor 2	-0.427982	0.376699
Ywhag	P61982	14-3-3 protein gamma;14-3-3 protein gamma, N-terminally processed	-0.303179	0.212892
Rras2;Rras	P62071;P10833	Ras-related protein R-Ras2;Ras-related protein R-Ras	-0.33539	0.492291
Timm13	P62075	Mitochondrial import inner membrane translocase subunit Tim13	0.0161967	0.0220128
Timm8b	P62077	Mitochondrial import inner membrane translocase subunit Tim8 B	-0.292069	0.265446
Rps7;Gm9493;Gm6472	P62082;F6SVV1;J3QJZ3	40S ribosomal protein S7	-0.166975	0.324774
Ppp1cb	P62141	Serine/threonine-protein phosphatase PP1-beta catalytic subunit	0.622008	0.969762
Psmc1	P62192	26S protease regulatory subunit 4	-0.0288625	0.0132944
Psmc5	P62196;Q8K1K2	26S protease regulatory subunit 8	-0.226743	0.348196
Calm1	P62204;Q3UKW2	Calmodulin	-0.0713134	0.0872371
Rps8	P62242	40S ribosomal protein S8	0.344456	0.454771
Ywhae	P62259	14-3-3 protein epsilon	-0.134762	1.00664
Rps14	P62264;D3YVF4;D3Z7I1	40S ribosomal protein S14	0.279877	1.00186
Rps11	P62281	40S ribosomal protein S11	0.912464	1.06855
Rps13	P62301	40S ribosomal protein S13	0.23405	0.459927
Psmc6	P62334	26S protease regulatory subunit 10B	0.637422	1.13515
Rab11a;Rab11b	P62492;G3UY29;E9Q3P9;F8WGS1	Ras-related protein Rab-11A	0.0817966	0.129176
Dynlrb1	P62627;A2AVR9	Dynein light chain roadblock-type 1	0.282941	1.69455
Rps4x	P62702	40S ribosomal protein S4, X isoform	0.3259	0.958687
Rpl23a;Gm3940;Gm10335	P62751;D3YU45;D3Z1D6	60S ribosomal protein L23a	-0.00768661	0.010555
Rps6	P62754	40S ribosomal protein S6	0.445413	0.633009
Mtpn	P62774	Myotrophin	-0.711914	0.529768
Hist1h4a	P62806	Histone H4	-0.420194	0.323505
Atp6v1b2	P62814	V-type proton ATPase subunit B, brain isoform	0.176332	0.636765
Rab1A	P62821	Ras-related protein Rab-1A	0.293961	0.780233
Ran;1700009N14Rik;Rasl2-9	P62827;Q14AA6;Q61820	GTP-binding nuclear protein Ran;GTP-binding nuclear protein Ran, testis-specific isoform	-0.216483	0.66789
Rps15	P62843;D3YTQ9	40S ribosomal protein S15	-0.0291772	0.0121633
Rps24	P62849	40S ribosomal protein S24	0.50817	1.08879
Rps26	P62855	40S ribosomal protein S26	0.365459	0.711012
Fau	P62862;Q642K5	40S ribosomal protein S30	0.632242	0.755985
Tceb2	P62869	Transcription elongation factor B polypeptide 2	0.137568	0.230859
Gnb1	P62874;H3BLF7;H3BKR2	Guanine nucleotide-binding protein G(I)/G(S)/G(T) subunit beta-1	0.438265	0.207696
Rbx1	P62878	E3 ubiquitin-protein ligase RBX1	-0.0713968	0.183248
Gnb2	P62880;E9QKR0;D3Z1M1;D3Z1T4;D3YZX3	Guanine nucleotide-binding protein G(I)/G(S)/G(T) subunit beta-2	-0.233405	0.365893
Rpl30	P62889	60S ribosomal protein L30	-0.234733	0.402283
Rpl31	P62900	60S ribosomal protein L31	0.301112	0.414178
Rps3	P62908;D3YV43	40S ribosomal protein S3	-0.028873	0.0958686
Rpl8	P62918	60S ribosomal protein L8	0.415291	0.25147
Ybx1	P62960;A2BGG7	Nuclease-sensitive element-binding protein 1	-0.308534	0.800206
Rps27a	P62983	Ubiquitin-40S ribosomal protein S27a;Ubiquitin;40S ribosomal protein S27a	-0.617152	0.692537
Rac1;Rac2;Rac3	P63001;Q3TLP8;Q05144;P60764;A2AC13	Ras-related C3 botulinum toxin substrate 1;Ras-related C3 botulinum toxin substrate 2;Ras-related C3 botulinum toxin substrate 3	-0.315218	1.26527
Pafah1b1	P63005	Platelet-activating factor acetylhydrolase IB subunit alpha	0.0502615	0.0359906
Hspa8	P63017;Q504P4	Heat shock cognate 71 kDa protein	0.0078783	0.0205073
Tpt1	P63028;D3YU75	Translationally-controlled tumor protein	-0.302042	0.591303
Dnaja1	P63037;B1AXY1	DnaJ homolog subfamily A member 1	0.231618	0.441494
Hspd1	P63038	60 kDa heat shock protein, mitochondrial	0.345669	1.69393
Ywhaz	P63101	14-3-3 protein zeta/delta	-0.217489	1.05382
Hmgb1	P63158;D3YZ18	High mobility group protein B1	-0.400218	1.01597
Eif5a	P63242	Eukaryotic translation initiation factor 5A-1	-0.469465	0.642383
Actg1	P63260	Actin, cytoplasmic 2;Actin, cytoplasmic 2, N-terminally processed	-0.305224	2.54151
Rps17	P63276	40S ribosomal protein S17	-0.188258	0.258413
Rps10	P63325;Q3UW83	40S ribosomal protein S10	0.37303	1.14093
Ppp2ca	P63330	Serine/threonine-protein phosphatase 2A catalytic subunit alpha isoform	-0.0866861	0.2526
Phb	P67778;Q5SQG5	Prohibitin	0.298119	1.39105
Rpl22	P67984	60S ribosomal protein L22	2.0365	0.920135	+
Actc1;Acta1	P68033;P68134	Actin, alpha cardiac muscle 1;Actin, alpha skeletal muscle	-0.412052	0.535369
Gnb2l1	P68040	Guanine nucleotide-binding protein subunit beta-2-like 1	-0.00356913	0.0101718
Ywhaq	P68254;F6YY69;F6VW30	14-3-3 protein theta	-0.464876	1.53928
Tuba4a	P68368	Tubulin alpha-4A chain	-1.07817	0.527859
Tubb4b;Tubb4a	P68372;Q9D6F9	Tubulin beta-4B chain;Tubulin beta-4A chain	-0.129292	0.341871
Tuba1c	P68373	Tubulin alpha-1C chain	-0.00895691	0.0442062
Ywhah	P68510	14-3-3 protein eta	-0.185383	0.80123
Kpnb1	P70168	Importin subunit beta-1	-0.131549	0.239839
Psmb7	P70195	Proteasome subunit beta type-7	-0.0277686	0.0795483
Pebp1	P70296;D3Z1V4;D6RHS6	Phosphatidylethanolamine-binding protein 1;Hippocampal cholinergic neurostimulating peptide	-0.258764	0.349892
Hint1	P70349	Histidine triad nucleotide-binding protein 1	0.255323	0.320577
Elavl1	P70372	ELAV-like protein 1	0.0195665	0.0236714
Idh3g	P70404	Isocitrate dehydrogenase [NAD] subunit gamma 1, mitochondrial	0.18169	0.225294
Slc9a3r1	P70441	Na(+)/H(+) exchange regulatory cofactor NHE-RF1	0.106284	0.299275
Naca	Q60817;P70670	Nascent polypeptide-associated complex subunit alpha;Nascent polypeptide-associated complex subunit alpha, muscle-specific form	0.148192	0.411996
Fbp2	P70695	Fructose-1,6-bisphosphatase isozyme 2	-0.477324	0.69883
Cct7	P80313	T-complex protein 1 subunit eta	0.0228539	0.02866
Cct2	P80314	T-complex protein 1 subunit beta	-0.0118451	0.0412335
Cct4	P80315;G5E839	T-complex protein 1 subunit delta	0.0272188	0.140267
Cct5	P80316	T-complex protein 1 subunit epsilon	-0.0627074	0.111207
Cct6a	P80317;E9QPA6	T-complex protein 1 subunit zeta	0.074626	0.145217
Cct3	P80318;E9Q133;Q3U0I3;F6Q609	T-complex protein 1 subunit gamma	-0.0414815	0.0802136
Tceb1	P83940	Transcription elongation factor B polypeptide 1	-0.195653	0.497216
Arf5	P84084	ADP-ribosylation factor 5	0.0112867	0.0206292
Erh	P84089;G3UW85	Enhancer of rudimentary homolog	-0.046174	0.0802518
Ap2m1	Q3TWV4;P84091	AP-2 complex subunit mu	-0.526279	0.255056
Srsf3;Gm12355	P84104;A2A4X6	Serine/arginine-rich splicing factor 3	0.486211	0.730175
Hist1h3b	P84228	Histone H3.2	-1.39167	0.600281
Isoc2a	P85094	Isochorismatase domain-containing protein 2A, mitochondrial	-0.576436	0.610451
Csrp2	P97314	Cysteine and glycine-rich protein 2	-0.859399	0.643027
Csrp1	P97315	Cysteine and glycine-rich protein 1	-0.0794368	0.0593982
Khk	P97328	Ketohexokinase	-0.837968	0.745312
Sephs2	P97364	Selenide, water dikinase 2	0.173465	0.178132
Anxa11	P97384;D3Z7U0	Annexin A11;Annexin	0.787252	0.465926
Atp5j	P97450;E9QAD6	ATP synthase-coupling factor 6, mitochondrial	0.12796	0.282473
Coq7	P97478;Q3TYT1	Ubiquinone biosynthesis protein COQ7 homolog	-0.684526	0.635067
Gclc	P97494	Glutamate--cysteine ligase catalytic subunit	0.345062	0.83975
Cpt1a	P97742	Carnitine O-palmitoyltransferase 1, liver isoform	0.254556	0.437205
Fh	P97807	Fumarate hydratase, mitochondrial	0.270464	1.35928
S100g	P97816	Protein S100-G	0.340417	0.237012
Lypla1	P97823;D3Z111;J3QK48;J3QP56;D3YUG4	Acyl-protein thioesterase 1	0.0601907	0.0811859
G3bp1	P97855	Ras GTPase-activating protein-binding protein 1	0.0611205	0.167003
Tubb5	P99024	Tubulin beta-5 chain	-0.569933	0.412206
Psmb4	P99026	Proteasome subunit beta type-4	0.272338	1.36187
Rplp2	P99027	60S acidic ribosomal protein P2	0.134342	0.221666
Uqcrh	P99028	Cytochrome b-c1 complex subunit 6, mitochondrial	0.159011	0.133691
Prdx5	P99029;G3UZJ4;H3BJQ7	Peroxiredoxin-5, mitochondrial	-0.129326	0.310373
G6pdx	Q00612;A3KG36	Glucose-6-phosphate 1-dehydrogenase X;Glucose-6-phosphate 1-dehydrogenase	-0.149794	0.306002
Apoa1	Q00623	Apolipoprotein A-I;Truncated apolipoprotein A-I	-1.20471	2.28636	+
Serpina1c;Serpina1a;Serpina1d	Q00896;P07758;Q00897	Alpha-1-antitrypsin 1-3;Alpha-1-antitrypsin 1-1;Alpha-1-antitrypsin 1-4	-2.57164	1.105	+
Hnrnpul2	Q00PI9	Heterogeneous nuclear ribonucleoprotein U-like protein 2	-0.472847	1.13934
Vcp	Q01853	Transitional endoplasmic reticulum ATPase	-0.0617371	0.249269
Aqp1	Q02013	Aquaporin-1	-0.288646	0.111347
Uba1	Q02053	Ubiquitin-like modifier-activating enzyme 1	-0.127056	0.563405
Nucb1	Q02819	Nucleobindin-1	-0.16382	0.0801013
Atp5a1	Q03265;D3Z6F5	ATP synthase subunit alpha, mitochondrial;ATP synthase subunit alpha	0.179482	0.546088
Ckb	Q04447	Creatine kinase B-type	-0.319481	1.26183
Fxyd2	Q04646	Sodium/potassium-transporting ATPase subunit gamma	0.218015	0.290594
Cyp2e1	Q05421	Cytochrome P450 2E1	0.900124	0.790081
Atp5i	Q06185	ATP synthase subunit e, mitochondrial	-0.0612826	0.0818769
Clu	Q06890;E9Q9B8;E9Q2G2;E9PUU2;E9PXG5;E9Q8Y5	Clusterin;Clusterin beta chain;Clusterin alpha chain	-1.19547	2.11168	+
Anxa7	Q07076	Annexin A7	-0.0272608	0.027661
Acads	Q07417;F6RAZ3	Short-chain specific acyl-CoA dehydrogenase, mitochondrial	-0.0145965	0.0599936
Cd36	Q08857	Platelet glycoprotein 4	-0.643495	0.363647
Acss3	Q14DH7	Acyl-CoA synthetase short-chain family member 3, mitochondrial	-0.467119	0.357404
Hnrnpab	Q99020;Q80XR6;Q20BD0	Heterogeneous nuclear ribonucleoprotein A/B	-0.10629	0.299758
Dcps	Q3TBW9;Q9DAR7	m7GpppX diphosphatase	1.46431	1.87462	+
Fahd2	Q3TC72	Fumarylacetoacetate hydrolase domain-containing protein 2A	-0.0258641	0.11952
Eci2	Q3TCD4;Q9WUR2;E9PVM6;E9PYC6;E9Q858;E9PUY9;E9PYA9;E9Q7A8	Enoyl-CoA delta isomerase 2, mitochondrial	0.491811	1.50002
Myl12b	Q3THE2	Myosin regulatory light chain 12B	-0.0587516	0.113253
Gmps	Q3THK7	GMP synthase [glutamine-hydrolyzing]	-0.937515	0.31345
Mat2a	Q3THS6	S-adenosylmethionine synthase isoform type-2	0.0612864	0.262459
Echdc2	Q3TLP5;F6YTG0;F6Z5N5	Enoyl-CoA hydratase domain-containing protein 2, mitochondrial	0.0331225	0.0547118
Pdia6	Q922R8;Q3TML0	Protein disulfide-isomerase A6	-0.381841	0.801223
Xylb	Q3TNA1	Xylulose kinase	-0.349075	0.513776
Entpd5	Q9WUZ9;Q3TQC7	Ectonucleoside triphosphate diphosphohydrolase 5	0.399552	1.25531
Uap1l1	Q3TW96	UDP-N-acetylhexosamine pyrophosphorylase-like protein 1	-0.316251	0.889982
Psmd1	Q3TXS7	26S proteasome non-ATPase regulatory subunit 1	0.103134	0.161398
Khsrp	Q3U0V1	Far upstream element-binding protein 2	-0.378947	1.10532
Fam213a	Q9CYH2;Q3U125;D3YYG8;D3Z398;D3Z252;D3Z0A8	Redox-regulatory protein FAM213A	0.0711427	0.136635
Hspa4	Q3U2G2;Q61316	Heat shock 70 kDa protein 4	0.0588198	0.161402
Ndufv3	Q3U422		-0.0396872	0.0279719
Sfxn3	Q3U4F0;Q91V61	Sideroflexin-3	0.631411	0.507952
Pyroxd2	Q3U4I7	Pyridine nucleotide-disulfide oxidoreductase domain-containing protein 2	-0.777987	0.65868
Ddx17	Q501J6;Q3U741	Probable ATP-dependent RNA helicase DDX17	-0.164026	0.178288
Xpnpep1	Q6P1B1;Q3UE92;S4R1I3	Xaa-Pro aminopeptidase 1	-0.177035	0.768733
Agxt2	Q3UEG6;H7BWY3	Alanine--glyoxylate aminotransferase 2, mitochondrial	-0.193954	0.519053
Uroc1	Q8VC12;Q3UEL5	Urocanate hydratase	0.171253	0.235518
Parva	Q3UF75;Q9EPC1	Alpha-parvin	-0.702814	0.303894
Dazap1	Q9JII5;Q3UGB5	DAZ-associated protein 1	-1.18186	1.03824	+
Myh10	Q61879;Q5SV64;Q3UH59	Myosin-10	-0.677691	1.22968
Snx27	Q3UHD6;D6RE54;E9PW30	Sorting nexin-27	-0.0677438	0.196137
Mccc2	Q3ULD5	Methylcrotonoyl-CoA carboxylase beta chain, mitochondrial	0.0301166	0.0495522
Gpd1l	Q3ULJ0	Glycerol-3-phosphate dehydrogenase 1-like protein	0.408367	0.342391
Ppp1r7	Q3UM45	Protein phosphatase 1 regulatory subunit 7	0.0957985	0.0465664
Acsm3	Q3UNX5	Acyl-coenzyme A synthetase ACSM3, mitochondrial	0.493766	1.07317
	Q3UNZ8	Quinone oxidoreductase-like protein 2	-0.141452	0.397696
Sec31a	Q3UPL0;S4R2A9	Protein transport protein Sec31A	-0.130497	0.649163
Acsf3	Q3URE1	Acyl-CoA synthetase family member 3, mitochondrial	-0.563582	0.649953
Mpst	Q99J99;Q3UW66	3-mercaptopyruvate sulfurtransferase;Sulfurtransferase	-0.364659	0.720113
Pecr	Q3UXD9;Q99MZ7	Peroxisomal trans-2-enoyl-CoA reductase	0.782702	1.69042
Sult1d1	Q3UZZ6	Sulfotransferase 1 family member D1	0.148094	0.459719
Pls1	Q3V0K9	Plastin-1	0.458741	1.72275
Acly	Q91V92;Q3V117	ATP-citrate synthase	-0.0674863	0.0743847
Ccdc110	Q3V125	Coiled-coil domain-containing protein 110	-1.09044	0.748046
Dync2h1	Q45VK7	Cytoplasmic dynein 2 heavy chain 1	1.13562	0.662373
Cdv3	Q4VAA2	Protein CDV3	-0.7502	0.989306
Arhgap1	Q5FWK3;A2AH25	Rho GTPase-activating protein 1	-0.804375	0.366557
Sdr39u1	Q5M8N4	Epimerase family protein SDR39U1	0.188884	0.145505
Crk	Q8JZR2;Q5ND50;Q64010;F7D232	Adapter molecule crk	-0.914326	0.735294
Clint1	Q5SUH7;Q99KN9;Q5SUH6	Clathrin interactor 1	-0.115604	0.544717
Ewsr1	Q5SUT0;Q61545;Q5SUS9	RNA-binding protein EWS	-0.0897636	0.166822
Cluh	Q5SW19	Clustered mitochondria protein homolog	0.0239525	0.0314482
Acaca	Q5SWU9	Acetyl-CoA carboxylase 1;Biotin carboxylase	-0.0780158	0.0416859
Cltc	Q68FD5;Q5SXR6	Clathrin heavy chain 1	-0.0721302	0.197021
Myo1d	Q5SYD0	Unconventional myosin-Id	0.0897007	0.0776504
Agphd1	Q5U5V2	Hydroxylysine kinase	0.0876818	0.167716
Rpl10a	Q5XJF6;P53026	Ribosomal protein;60S ribosomal protein L10a	0.0227661	0.0241132
Arcn1	Q5XJY5	Coatomer subunit delta	-0.0309401	0.0378608
Ogdh	Q60597	2-oxoglutarate dehydrogenase, mitochondrial	0.133005	0.548447
Cttn	Q921L6;Q60598	Src substrate cortactin	-0.437965	0.436041
Scin	Q60604	Adseverin	-0.704313	0.645793
Myl6	Q60605	Myosin light polypeptide 6	-0.385612	1.77516
Psmb6	Q60692	Proteasome subunit beta type-6	-0.127641	0.122884
Gcdh	Q60759	Glutaryl-CoA dehydrogenase, mitochondrial	0.238053	1.16323
Slc34a1	Q9D2V6;Q60825	Sodium-dependent phosphate transport protein 2A	0.164209	0.283498
Stip1	Q60864	Stress-induced-phosphoprotein 1	-0.0296059	0.0481562
Caprin1	Q60865	Caprin-1	0.00263453	0.00344492
Pter	Q60866;A2AUR5	Phosphotriesterase-related protein	-0.0119739	0.0254351
Vdac1	Q60932	Voltage-dependent anion-selective channel protein 1	0.132195	0.267333
Adck3	Q60936;E0CYD3;E0CYT4;E0CYG7;E0CZ05;E0CXT4;E0CXR6;E0CYC1;E0CXR1	Chaperone activity of bc1 complex-like, mitochondrial	0.117887	0.14621
Rbbp4	Q60972	Histone-binding protein RBBP4	-0.236533	0.470376
Tmpo	Q61029	Lamina-associated polypeptide 2, isoforms beta/delta/epsilon/gamma	0.843059	0.533388
Hars;Hars2	Q61035;G5E823;Q99KK9	Histidine--tRNA ligase, cytoplasmic;Probable histidine--tRNA ligase, mitochondrial	-0.180189	0.122673
Cdc37	Q61081	Hsp90 co-chaperone Cdc37	0.0236111	0.0887438
Gstt2	Q61133	Glutathione S-transferase theta-2	-0.562059	2.23838
Mapre1	Q61166	Microtubule-associated protein RP/EB family member 1	-0.416247	1.1321
Prdx2	Q61171;D3Z4A4	Peroxiredoxin-2	0.0510201	0.139826
Lcp1	Q61233	Plastin-2	-1.43752	1.59867	+
Igbp1	Q61249	Immunoglobulin-binding protein 1	-0.179999	0.176876
Bcap31	Q61335	B-cell receptor-associated protein 31	0.00681734	0.0127529
Hadh	Q61425	Hydroxyacyl-coenzyme A dehydrogenase, mitochondrial	0.236867	1.06986
Gdi2	Q61598	Rab GDP dissociation inhibitor beta	-0.192155	0.569022
Ddx5	Q61656;Q8BTS0;S4R1I6	Probable ATP-dependent RNA helicase DDX5	-0.0939722	0.169721
Phgdh	Q61753	D-3-phosphoglycerate dehydrogenase	-0.307569	0.108158
Hsd3b4;Gm4450;Hsd3b5	Q61767;E9Q007;Q61694	3 beta-hydroxysteroid dehydrogenase type 4;3 beta-hydroxysteroid dehydrogenase type 5	-0.127335	0.267212
Kif5b	Q61768;E9QAK5	Kinesin-1 heavy chain	-0.200916	0.263848
Lasp1	Q61792;A2A6G9;A2A6H0;A2A6G7;A2A6G8;A2A6G6	LIM and SH3 domain protein 1	-0.25199	0.46171
Mep1b	Q61847	Meprin A subunit beta	0.582774	0.989242
Npm1	Q61937;Q9DAY9;Q5SQB0;Q5SQB5	Nucleophosmin	-0.182965	0.253467
Pcbp2;Pcbp3	Q61990;E9Q7D8;P57722	Poly(rC)-binding protein 2;Poly(rC)-binding protein 3	-0.980085	0.764394
Srsf2	Q62093	Serine/arginine-rich splicing factor 2	-0.143759	0.0896621
Ddx3x;Ddx3y;D1Pas1	Q62167;Q62095;P16381	ATP-dependent RNA helicase DDX3X;ATP-dependent RNA helicase DDX3Y;Putative ATP-dependent RNA helicase Pl10	0.0528679	0.141466
Sptbn1	Q62261	Spectrin beta chain, non-erythrocytic 1	-0.0738544	0.262396
Thrsp	Q62264	Thyroid hormone-inducible hepatic protein	0.788666	0.720405
Trim28	Q62318	Transcription intermediary factor 1-beta	0.264846	0.197157
Snrnp70	Q62376	U1 small nuclear ribonucleoprotein 70 kDa	-0.00037384	0.000280973
Dbnl	Q62418	Drebrin-like protein	-0.474524	3.67593
Ndufa4	Q62425	NADH dehydrogenase [ubiquinone] 1 alpha subcomplex subunit 4	1.11836	0.495114
Cstb	Q62426	Cystatin-B	-0.484207	0.532715
Ndrg1	Q62433	Protein NDRG1	-0.0705891	0.19127
Fkbp3	Q62446	Peptidyl-prolyl cis-trans isomerase FKBP3	-0.156953	0.226075
Vil1	Q62468	Villin-1	-0.0795245	0.355425
Sdpr	Q63918	Serum deprivation-response protein	-0.582954	0.880326
Btf3	Q64152	Transcription factor BTF3	-0.222915	0.108276
Svs6	Q9D268;Q64356	Seminal vesicle secretory protein 6	-1.57729	0.683199	+
Hspe1	Q64433	10 kDa heat shock protein, mitochondrial	0.493512	2.01148
Sord	Q64442	Sorbitol dehydrogenase	-0.0116682	0.0281638
Cyp4b1	Q64462;F6X6A4	Cytochrome P450 4B1	0.199946	0.391226
Gstt1	Q64471;D3Z3X5	Glutathione S-transferase theta-1	-0.49068	0.777673
Gk	Q64516	Glycerol kinase	0.0151443	0.071858
Gpd2	Q64521;A2AQR0	Glycerol-3-phosphate dehydrogenase, mitochondrial	0.350268	0.387988
Nqo1	Q64669	NAD(P)H dehydrogenase [quinone] 1	-0.301367	2.43644
Vcl	Q64727	Vinculin	-0.270052	0.569441
FAM120A	Q6A0A9	Constitutive coactivator of PPAR-gamma-like protein 1	-0.0192156	0.104342
Prdx6	Q6GT24;D3Z0Y2;O08709	Peroxiredoxin-6	0.261573	1.7698
Parpbp	Q6IRT3	PCNA-interacting partner	-0.327203	0.083314
Tpm4	Q6IRU2	Tropomyosin alpha-4 chain	-0.50545	2.4648
Cltb	Q6IRU5;F7BHJ0	Clathrin light chain B	-0.0293865	0.0484829
Npepl1	Q6NSR8	Probable aminopeptidase NPEPL1	-0.788846	0.705125
Snx1	Q6NZD2;Q9WV80	Sorting nexin-1	-0.0216556	0.0467498
Sri	Q6P069	Sorcin	-0.284679	1.30967
Ppp2r2a	Q6P1F6	Serine/threonine-protein phosphatase 2A 55 kDa regulatory subunit B alpha isoform	0.312795	1.02264
Bckdhb	Q6P3A8	2-oxoisovalerate dehydrogenase subunit beta, mitochondrial	-0.361947	1.11382
Clpx	Q6P8N8;Q9JHS4	ATP-dependent Clp protease ATP-binding subunit clpX-like, mitochondrial	-0.678843	0.413119
Snx6	Q6P8X1	Sorting nexin-6	-0.326188	0.815346
Lrpprc	Q6PB66	Leucine-rich PPR motif-containing protein, mitochondrial	0.186221	0.651742
Etfdh	Q6PF96;Q921G7	Electron transfer flavoprotein-ubiquinone oxidoreductase, mitochondrial	0.279469	0.97422
	Q6PIU9	Uncharacterized protein FLJ45252 homolog	-0.0976992	0.0549679
Tardbp	Q8R0B4;Q8BLD4;Q6VYI5;Q6VYI4;Q921F2	TAR DNA-binding protein 43	-0.158038	0.211834
Cand1	Q6ZQ38	Cullin-associated NEDD8-dissociated protein 1	0.14338	0.363518
Mlec	Q6ZQI3;D3Z1M3	Malectin	0.287284	0.53855
Ugt1a7c	Q6ZQM8	UDP-glucuronosyltransferase 1-7C	0.187135	0.345819
Myl12a	Q6ZWQ9;D3YV37		-0.346521	0.164898
Eif2s1	Q6ZWX6	Eukaryotic translation initiation factor 2 subunit 1	0.944961	0.515088
Tmsb10	Q6ZWY8	Thymosin beta-10	-0.982296	0.531554
Rpl36	Q6ZWZ4	60S ribosomal protein L36	0.648649	0.384517
Rps12	Q6ZWZ6;P63323	40S ribosomal protein S12	-0.331694	0.414468
Rpl17	Q9CPR4;Q6ZWZ7	60S ribosomal protein L17	0.489709	0.729017
Ccbl2	Q71RI9	Kynurenine--oxoglutarate transaminase 3	1.05279	0.82397
Ppp2r1a	Q76MZ3	Serine/threonine-protein phosphatase 2A 65 kDa regulatory subunit A alpha isoform	-0.0288019	0.0634604
Usmg5	Q78IK2	Up-regulated during skeletal muscle growth protein 5	-0.311237	0.205056
Apool	Q78IK4;B1AV14	Apolipoprotein O-like	-0.137222	0.52756
Eci3	Q78JN3;E9PY42		1.44535	3.15051	+
Haao	Q78JT3	3-hydroxyanthranilate 3,4-dioxygenase	0.477273	0.186221
Slc22a18	Q78KK3	Solute carrier family 22 member 18	0.105124	0.0852412
Snd1	Q78PY7;Q3TJ56	Staphylococcal nuclease domain-containing protein 1	-0.109553	0.278239
Mtch2	Q791V5;A2AFW6;Q9D050	Mitochondrial carrier homolog 2	0.612327	1.66909
Picalm	Q7M6Y3	Phosphatidylinositol-binding clathrin assembly protein	-0.145471	0.318835
Ndufa12	Q7TMF3	NADH dehydrogenase [ubiquinone] 1 alpha subcomplex subunit 12	0.217726	0.850068
Tubb2b;Tubb2a	Q9CWF2;Q7TMM9	Tubulin beta-2B chain;Tubulin beta-2A chain	-1.17992	0.666548
Abcg2	S4R2E1;Q7TMS5;D3Z150	ATP-binding cassette sub-family G member 2	0.708554	1.28515
	Q7TNE1	CaiB/baiF CoA-transferase family protein C7orf10 homolog	-0.134422	0.196849
Ldhd	Q7TNG8	Probable D-lactate dehydrogenase, mitochondrial	-0.19039	0.639148
Dek	Q7TNV0	Protein DEK	0.194931	0.29661
Thnsl2	Q80W22	Threonine synthase-like 2	-0.147982	0.242541
Flnb	Q80X90	Filamin-B	-0.276297	1.24115
Acad11	Q80XL6;D3YTQ5	Acyl-CoA dehydrogenase family member 11	0.484206	1.30728
Bdh1	Q80XN0;D3Z2Y8	D-beta-hydroxybutyrate dehydrogenase, mitochondrial	0.298421	0.880664
Glrx5	Q80Y14	Glutaredoxin-related protein 5, mitochondrial	0.0646806	0.0796722
Tufm;Gm9755	Q8BFR5;D3YVN7	Elongation factor Tu, mitochondrial;Elongation factor Tu	0.170916	0.763719
Lpp	Q8BFW7	Lipoma-preferred partner homolog	-0.130254	0.174042
Actbl2	Q8BFZ3	Beta-actin-like protein 2	0.394863	0.103868
Erlin2	Q8BFZ9	Erlin-2	0.127006	0.284417
Psmd11	Q8BG32;G3UYH2	26S proteasome non-ATPase regulatory subunit 11	-0.0530119	0.111512
Acsm5	Q8BGA8	Acyl-coenzyme A synthetase ACSM5, mitochondrial	0.482868	1.55237
Zadh2	Q8BGC4	Zinc-binding alcohol dehydrogenase domain-containing protein 2	0.215305	0.385784
Coa6	Q8BGD8	Cytochrome c oxidase assembly factor 6 homolog	0.640514	0.686178
Eif4b	Q8BGD9	Eukaryotic translation initiation factor 4B	-0.190322	0.562495
Ptbp1	Q8BGJ5;Q922I7;Q8CB58;P17225;E9QMW9	Polypyrimidine tract-binding protein 1	-0.192651	0.320909
Aars	Q8BGQ7	Alanine--tRNA ligase, cytoplasmic	-0.016511	0.0256799
Bola2	Q8BGS2	BolA-like protein 2	-0.587188	0.500209
Aldh8a1	Q8BH00	Aldehyde dehydrogenase family 8 member A1	-0.0454941	0.142804
Slc25a12	Q8BH59	Calcium-binding mitochondrial carrier protein Aralar1	0.197	0.292394
Echs1	Q8BH95;F6T930	Enoyl-CoA hydratase, mitochondrial	0.162697	0.526093
Ganab	Q8BHN3	Neutral alpha-glucosidase AB	0.120004	0.369485
Iars2	Q8BIJ6;E9PWN2	Isoleucine--tRNA ligase, mitochondrial	-0.134455	0.106086
Chdh	Q8BJ64	Choline dehydrogenase, mitochondrial	0.182547	0.474434
Sgta	Q8BJU0	Small glutamine-rich tetratricopeptide repeat-containing protein alpha	-1.39793	1.96705	+
Psmd5	Q8BJY1	26S proteasome non-ATPase regulatory subunit 5	-0.426663	0.392214
Ndufv3	Q8BK30	NADH dehydrogenase [ubiquinone] flavoprotein 3, mitochondrial	0.384175	0.139488
Pdhx	Q8BKZ9	Pyruvate dehydrogenase protein X component, mitochondrial	0.22149	0.782613
Eea1	Q8BL66	Early endosome antigen 1	-0.0752845	0.191202
Nceh1	Q8BLF1	Neutral cholesterol ester hydrolase 1	1.68789	0.644047	+
Atp6v1g3	Q8BMC1	V-type proton ATPase subunit G 3	0.352953	1.17467
Dlat	Q8BMF4	Dihydrolipoyllysine-residue acetyltransferase component of pyruvate dehydrogenase complex, mitochondrial	-0.10994	0.114206
Hadha	Q8BMS1	Trifunctional enzyme subunit alpha, mitochondrial;Long-chain enoyl-CoA hydratase;Long chain 3-hydroxyacyl-CoA dehydrogenase	0.17671	1.09955
Coq3	Q8BMS4	Hexaprenyldihydroxybenzoate methyltransferase, mitochondrial	-0.861499	1.04101
Acp6	Q8BP40	Lysophosphatidic acid phosphatase type 6	-0.244164	0.19279
Nars	Q8BP47	Asparagine--tRNA ligase, cytoplasmic	-0.0830159	0.0607105
Rpl24	Q8BP67	60S ribosomal protein L24	0.237647	0.424864
Svs2	Q8BS30		-3.83223	1.58662	+
Cep55	Q8BT07	Centrosomal protein of 55 kDa	-0.339278	0.418004
Atp6v1h	Q8BVE3	V-type proton ATPase subunit H	0.152373	0.321846
Aldh5a1	Q8BWF0	Succinate-semialdehyde dehydrogenase, mitochondrial	0.226561	2.02887
Ptges2	Q8BWM0	Prostaglandin E synthase 2;Prostaglandin E synthase 2 truncated form	0.132717	0.0707382
Acot4	Q8BWN8	Acyl-coenzyme A thioesterase 4	0.413553	0.725374
Acaa2	Q8BWT1	3-ketoacyl-CoA thiolase, mitochondrial	0.181669	0.486047
Pgm3	Q8BWW3;Q9CYR6	Phosphoacetylglucosamine mutase	-1.10478	1.47559	+
Etf1	Q8BWY3	Eukaryotic peptide chain release factor subunit 1	0.0116105	0.0249756
Slc5a8	Q8BYF6	Sodium-coupled monocarboxylate transporter 1	0.0809579	0.125385
Ttc22	Q8C159	Tetratricopeptide repeat protein 22	0.159091	0.063436
Cps1	Q8C196	Carbamoyl-phosphate synthase [ammonia], mitochondrial	-0.0895185	0.10335
2015-09-11	Q8C1B7	Septin-11	-1.06481	0.432454
Atp5c1	Q8C2Q8;Q91VR2;A2AKU9;A2AKV2;A2AKV3;A2AKV1	ATP synthase subunit gamma;ATP synthase subunit gamma, mitochondrial	0.382957	0.747031
Nadkd1	Q8C5H8	NAD kinase domain-containing protein 1, mitochondrial	-0.268854	0.447752
Pfkp	Q9WUA3;Q8C605	6-phosphofructokinase type C;6-phosphofructokinase	-0.107432	0.0903657
Mettl7a1	Q8C6B0		-1.03963	0.452624
Immt	Q8CAQ8;E9Q800;E9QAY6	Mitochondrial inner membrane protein	0.367798	0.719857
Acat2;Acat3	Q8CAY6;G3XA25;Q80X81	Acetyl-CoA acetyltransferase, cytosolic	-0.427065	0.63286
Naprt1	Q8CC86	Nicotinate phosphoribosyltransferase	-0.459515	0.116846
Vwa8	Q8CC88	von Willebrand factor A domain-containing protein 8	0.26392	1.36872
Txnl1	Q8CDN6	Thioredoxin-like protein 1	-0.0662761	0.435586
Akr1e1;Akr1e2	Q8CEB6;Q9DCT1	1,5-anhydro-D-fructose reductase	-0.84093	0.423053
Amt	Q8CFA2	Aminomethyltransferase, mitochondrial	-0.674837	0.740278
Slc22a12	Q8CFZ5;F7A0H7	Solute carrier family 22 member 12	0.56943	0.66029
Akr7a2	Q8CG76	Aflatoxin B1 aldehyde reductase member 2	0.250267	0.46666
Eprs	Q8CGC7	Bifunctional glutamate/proline--tRNA ligase;Glutamate--tRNA ligase;Proline--tRNA ligase	0.0888381	0.230517
Lonp1	Q8CGK3	Lon protease homolog, mitochondrial	0.295072	0.893232
Rab11fip3	Q8CHD8	Rab11 family-interacting protein 3	0.747374	0.595771
Pgp	Q8CHP8	Phosphoglycolate phosphatase	0.161699	0.121149
Aldh4a1	Q8CHT0	Delta-1-pyrroline-5-carboxylate dehydrogenase, mitochondrial	0.143681	0.391592
Pygb;Pygm	Q8CI94;Q9WUB3	Glycogen phosphorylase, brain form;Glycogen phosphorylase, muscle form	-0.00742245	0.023427
Hmgcs1	Q8JZK9	Hydroxymethylglutaryl-CoA synthase, cytoplasmic	0.338401	0.767265
Acad9	Q8JZN5	Acyl-CoA dehydrogenase family member 9, mitochondrial	0.195376	0.572666
Afg3l2	Q8JZQ2	AFG3-like protein 2	0.10598	0.127396
Eif3b	Q8JZQ9	Eukaryotic translation initiation factor 3 subunit B	-0.334753	0.613362
Slc25a1	Q8JZU2;F6VVY4		-0.000422001	0.000327351
Amdhd2	Q8JZV7;F6UP77	Putative N-acetylglucosamine-6-phosphate deacetylase	-0.216013	0.530329
Ugt3a2	Q8JZZ0	UDP-glucuronosyltransferase 3A2	0.28001	1.32622
Oplah	Q8K010;E9Q484	5-oxoprolinase	-0.187206	0.692374
Cyp51a1	Q8K0C4	Lanosterol 14-alpha demethylase	0.704629	2.25973
Gfm1	Q8K0D5;E0CXN8	Elongation factor G, mitochondrial	0.123339	0.628262
Slc47a1	Q8K0H1;D6RGQ3	Multidrug and toxin extrusion protein 1	0.0991373	0.071287
Acsm2	Q8K0L3	Acyl-coenzyme A synthetase ACSM2, mitochondrial	0.102687	0.290607
Hspa12a	Q8K0U4	Heat shock 70 kDa protein 12A	-0.175915	0.329082
Galm	Q8K157	Aldose 1-epimerase	-0.220411	0.870188
Coq9	Q8K1Z0;F6SFF5	Ubiquinone biosynthesis protein COQ9, mitochondrial	0.0521746	0.022821
Sdha	Q8K2B3	Succinate dehydrogenase [ubiquinone] flavoprotein subunit, mitochondrial	-0.128908	0.359172
Fmo2	Q8K2I3	Dimethylaniline monooxygenase [N-oxide-forming] 2	-0.657602	1.16374
Matr3	Q8K310	Matrin-3	0.0355721	0.0869963
Acad10;Acad12	Q8K370;D3Z7X0;D3Z2B3	Acyl-CoA dehydrogenase family member 10	-0.0139961	0.0371576
Ndufs8	Q8K3J1	NADH dehydrogenase [ubiquinone] iron-sulfur protein 8, mitochondrial	-0.200758	0.318237
Pitrm1	Q8K411	Presequence protease, mitochondrial	-0.14591	0.331346
Abhd11	Q8K4F5;D3YYK0	Alpha/beta hydrolase domain-containing protein 11	0.981419	0.70319
Apoa1bp	Q8K4Z3	NAD(P)H-hydrate epimerase	-0.527032	1.52692
Hibch	Q8QZS1;E0CX19	3-hydroxyisobutyryl-CoA hydrolase, mitochondrial	0.0107965	0.02469
Acat1	Q8QZT1	Acetyl-CoA acetyltransferase, mitochondrial	-0.0835752	0.245483
Eif3l	Q8QZY1	Eukaryotic translation initiation factor 3 subunit L	-0.0435443	0.0721938
Glyctk	Q8QZY2;E0CZG7	Glycerate kinase	-1.53376	0.802235	+
Blmh	Q8R016	Bleomycin hydrolase	0.156481	0.188547
Gspt1	Q8R050	Eukaryotic peptide chain release factor GTP-binding subunit ERF3A	0.991904	0.690372
Suox	Q8R086	Sulfite oxidase, mitochondrial	-0.0624957	0.0576192
Fahd1	Q8R0F8	Acylpyruvase FAHD1, mitochondrial	-0.0350208	0.110516
Adhfe1	Q8R0N6	Hydroxyacid-oxoacid transhydrogenase, mitochondrial	0.308834	1.50001
Aldh1l1	Q8R0Y6	Cytosolic 10-formyltetrahydrofolate dehydrogenase	0.277705	1.39257
Apeh	Q8R146	Acylamino-acid-releasing enzyme	0.368816	1.03929
Bphl	Q8R164	Valacyclovir hydrolase	0.25719	1.09778
Eif3c	Q8R1B4	Eukaryotic translation initiation factor 3 subunit C	-0.178363	0.442793
Cmbl	Q8R1G2;E0CXT6;E0CXH4	Carboxymethylenebutenolidase homolog	-0.0572648	0.0510329
Pdlim2	Q8R1G6;E9Q996	PDZ and LIM domain protein 2	-0.0941105	0.225511
Uqcr10	Q8R1I1	Cytochrome b-c1 complex subunit 9	-0.208981	0.457891
Dync1li1	Q8R1Q8	Cytoplasmic dynein 1 light intermediate chain 1	-1.78047	2.05725	+
Tmed4;Tmed9	Q8R1V4;Q5SVW9;Q99KF1	Transmembrane emp24 domain-containing protein 4;Transmembrane emp24 domain-containing protein 9	-0.348575	0.234494
Qil1	Q8R404	Protein QIL1	1.34718	1.11554	+
Clybl	Q8R4N0	Citrate lyase subunit beta-like protein, mitochondrial	0.0989628	0.161086
Acmsd	Q8R519	2-amino-3-carboxymuconate-6-semialdehyde decarboxylase	0.127107	0.190023
Actr1b	Q8R5C5;E0CZD4;E0CYB4	Beta-centractin	-0.286278	0.479684
C1qbp	Q8R5L1;O35658	Complement component 1 Q subcomponent-binding protein, mitochondrial	-0.424129	1.06614
Dak	Q8VC30	Bifunctional ATP-dependent dihydroxyacetone kinase/FAD-AMP lyase (cyclizing);ATP-dependent dihydroxyacetone kinase;FAD-AMP lyase (cyclizing)	0.175255	0.52343
Slc22a6	Q8VC69	Solute carrier family 22 member 6	1.63998	3.32279	+
Scrn2	Q8VCA8	Secernin-2	-0.232057	0.836414
Acaa1b	Q8VCH0	3-ketoacyl-CoA thiolase B, peroxisomal	0.124812	0.200843
Pex19	Q8VCI5	Peroxisomal biogenesis factor 19	0.412351	0.816947
Cth	Q8VCN5	Cystathionine gamma-lyase	-0.213556	0.416242
Ces1d	Q8VCT4	Carboxylesterase 1D	0.244737	0.608433
Acsf2	Q8VCW8	Acyl-CoA synthetase family member 2, mitochondrial	-0.81195	1.67443
Myh9	Q8VDD5	Myosin-9	-0.386968	1.3243
Hdlbp	Q8VDJ3	Vigilin	-0.0395169	0.0805164
Nit1	Q8VDK1;D3YY53	Nitrilase homolog 1	0.0509453	0.0430976
Psmd2;Gm5422	Q8VDM4;J3KMQ2	26S proteasome non-ATPase regulatory subunit 2	-0.117676	0.0881467
Atp1a1	Q8VDN2	Sodium/potassium-transporting ATPase subunit alpha-1	0.389221	0.93831
Ptgr2	Q8VDQ1;Q3TXN1;D6RGL6	Prostaglandin reductase 2	0.32405	0.7723
Oxnad1	Q8VE38	Oxidoreductase NAD-binding domain-containing protein 1	0.313637	0.291694
Hnrnpr	Q8VHM5;F7B5B5;A2AW41		0.258473	0.162954
Sfpq	Q8VIJ6	Splicing factor, proline- and glutamine-rich	-0.343143	0.614088
Rab14	Q91V41;A2AL34	Ras-related protein Rab-14	-0.0330977	0.0597863
Isoc1	Q91V64	Isochorismatase domain-containing protein 1	-0.125128	0.348556
	Q91V76	Ester hydrolase C11orf54 homolog	-0.159213	0.227121
Acsm1	Q91VA0;D3Z106	Acyl-coenzyme A synthetase ACSM1, mitochondrial	0.447891	0.958097
Idh3b	Q91VA7		0.21878	1.2269
Hba-a1;Hba	Q91VB8;P01942	Hemoglobin subunit alpha	-0.207317	0.199871
Ndufs1	Q91VD9	NADH-ubiquinone oxidoreductase 75 kDa subunit, mitochondrial	0.0855117	0.375367
Snx9	Q91VH2	Sorting nexin-9	-0.343192	0.364914
Rnh1	Q91VI7	Ribonuclease inhibitor	-0.522274	1.29754
Ppa2	Q91VM9	Inorganic pyrophosphatase 2, mitochondrial	0.0337029	0.0762256
Ddx1	Q91VR5	ATP-dependent RNA helicase DDX1	-0.157656	0.154778
Cbr4	Q91VT4	Carbonyl reductase family member 4	-0.290416	0.136276
Gldc	Q91W43	Glycine dehydrogenase [decarboxylating], mitochondrial	-0.20391	0.404476
Setd3	Q91WC0;D6RCY6;F2Z438;F2Z420	Histone-lysine N-methyltransferase setd3	0.454206	0.232336
Ndufs2	Q91WD5;D3YXT0;F6RJ83	NADH dehydrogenase [ubiquinone] iron-sulfur protein 2, mitochondrial	0.294495	1.00511
Ces2c	Q91WG0		0.962477	1.74987	+
Eif3h	Q91WK2	Eukaryotic translation initiation factor 3 subunit H	0.0770836	0.45014
Kmo	Q91WN4	Kynurenine 3-monooxygenase	0.430106	0.515029
Akr1c21	Q91WR5	Aldo-keto reductase family 1 member C21	-0.103087	0.763329
Cisd1	Q91WS0	CDGSH iron-sulfur domain-containing protein 1	0.408717	0.771061
Akr1c14	Q91WT7		1.19068	2.27668	+
Cbs	Q91WT9	Cystathionine beta-synthase	-0.2957	0.447195
Ces1f	Q91WU0		0.482606	1.29774
As3mt	Q91WU5	Arsenite methyltransferase	-0.219868	0.956753
Slc3a1	Q91WV7		0.275351	1.43257
Umod	Q91X17	Uromodulin;Uromodulin, secreted form	-2.04645	2.617	+
Dcxr	Q91X52;A2AC16	L-xylulose reductase	0.0969386	0.250328
Hpx	Q91X72	Hemopexin	-0.574839	0.421715
Qprt	Q91X91	Nicotinate-nucleotide pyrophosphorylase [carboxylating]	-0.645214	0.407165
Vps36	Q91XD6	Vacuolar protein-sorting-associated protein 36	0.0689096	0.0674889
Glyat	Q91XE0	Glycine N-acyltransferase	0.248067	0.643922
Acy3	Q91XE4	Aspartoacylase-2	0.283037	0.831461
Tmem205	Q91XE8	Transmembrane protein 205	0.398836	0.819705
Spr	Q91XH5;G3UXX3;Q64105	Sepiapterin reductase	-0.28472	0.803819
Pip4k2c	Q91XU3	Phosphatidylinositol 5-phosphate 4-kinase type-2 gamma	-0.358574	0.251528
Aldob	Q91Y97	Fructose-bisphosphate aldolase B	0.0563736	0.095887
Atp6v1b1	Q91YH6		0.16536	0.775965
Asl	Q91YI0;E0CXM2;E0CY49	Argininosuccinate lyase	-0.022788	0.0508697
L2hgdh	Q91YP0	L-2-hydroxyglutarate dehydrogenase, mitochondrial	0.57138	0.448554
Rpn1	Q91YQ5	Dolichyl-diphosphooligosaccharide--protein glycosyltransferase subunit 1	0.403378	0.556157
Twf1	Q91YR1	Twinfilin-1	0.0479341	0.125394
Grhpr	Q91Z53	Glyoxylate reductase/hydroxypyruvate reductase	0.145177	0.231785
Pcca	Q91ZA3	Propionyl-CoA carboxylase alpha chain, mitochondrial	0.111196	0.295021
Ugp2	Q91ZJ5	UTP--glucose-1-phosphate uridylyltransferase	0.409359	3.13814
Scpep1	Q920A5	Retinoid-inducible serine carboxypeptidase	-0.053103	0.167711
Msi2	Q920Q6	RNA-binding protein Musashi homolog 2	-0.536222	0.53117
Atp6v0a4	Q920R6	V-type proton ATPase 116 kDa subunit a isoform 4	0.0718718	0.11435
Acaa1a	Q921H8;H3BKL5;H3BJZ9	3-ketoacyl-CoA thiolase A, peroxisomal	0.0519218	0.0644306
Selrc1	Q921H9	Sel1 repeat-containing protein 1	0.853434	1.11539
Sf3b3	Q921M3	Splicing factor 3B subunit 3	-0.567609	0.868792
Tnfaip8	Q921Z5;J3QM73;D3YWJ5;D3Z325;D3Z312	Tumor necrosis factor alpha-induced protein 8	0.373291	0.236002
Dars	Q922B2	Aspartate--tRNA ligase, cytoplasmic	-0.142604	0.333434
Mthfd1	Q922D8	C-1-tetrahydrofolate synthase, cytoplasmic;Methylenetetrahydrofolate dehydrogenase;Methenyltetrahydrofolate cyclohydrolase;Formyltetrahydrofolate synthetase	0.189008	0.706568
2015-03-02	Q922Q1;F6UB20	MOSC domain-containing protein 2, mitochondrial	0.160365	0.276321
Ubxn1	Q922Y1	UBX domain-containing protein 1	1.3893	0.910771	+
Slc5a2	Q923I7	Sodium/glucose cotransporter 2	0.245582	0.35357
Impa1	Q924B0;O55023;Q80ZJ2	Inositol monophosphatase 1	-0.669566	0.66214
Rtn4ip1	Q924D0	Reticulon-4-interacting protein 1, mitochondrial	0.378625	0.234368
Mpi	Q924M7	Mannose-6-phosphate isomerase	-0.187055	0.747279
Sfxn2	Q925N2	Sideroflexin-2	0.393566	0.392602
Taldo1	Q93092	Transaldolase	-0.0724411	0.0807177
Stoml2	Q99JB2;A2AG41	Stomatin-like protein 2, mitochondrial	-0.279149	0.417678
Amn	Q99JB7	Protein amnionless	-0.13939	0.320785
Mvd	Q99JF5	Diphosphomevalonate decarboxylase	-0.340606	0.327126
Psmd6	Q99JI4	26S proteasome non-ATPase regulatory subunit 6	-0.438546	0.372741
Rap1b	Q99JI6	Ras-related protein Rap-1b	-0.0818481	0.0975086
Sfxn1	Q99JR1	Sideroflexin-1	0.305099	0.900881
Acy1	Q99JW2	Aminoacylase-1	0.323196	0.765711
Hadhb	Q99JY0	Trifunctional enzyme subunit beta, mitochondrial;3-ketoacyl-CoA thiolase	0.144144	0.9199
Actr3	Q99JY9	Actin-related protein 3	-0.089252	0.39854
Eps8l2	Q99K30	Epidermal growth factor receptor kinase substrate 8-like protein 2	0.0471277	0.0389949
Nono	Q99K48	Non-POU domain-containing octamer-binding protein	-0.112882	0.239082
Aass	Q99K67	Alpha-aminoadipic semialdehyde synthase, mitochondrial;Lysine ketoglutarate reductase;Saccharopine dehydrogenase	-0.337697	1.82207
Vwa5a	Q99KC8	von Willebrand factor A domain-containing protein 5A	0.113511	0.0778712
Aco2	Q99KI0	Aconitate hydratase, mitochondrial	0.067975	0.540423
Dctn2	Q99KJ8	Dynactin subunit 2	-0.135122	0.149412
Dpp3	Q99KK7	Dipeptidyl peptidase 3	-0.880038	1.82764
Cryl1	Q99KP3	Lambda-crystallin homolog	0.183614	0.904574
Nampt	Q99KQ4	Nicotinamide phosphoribosyltransferase	0.0342002	0.182532
Lactb2	Q99KR3	Beta-lactamase-like protein 2	0.113122	0.181657
Dhrs1	Q99L04	Dehydrogenase/reductase SDR family member 1	0.134968	0.269661
Hibadh	Q99L13	3-hydroxyisobutyrate dehydrogenase, mitochondrial	0.107196	0.333376
Eif2s2	Q99L45;E0CXJ3	Eukaryotic translation initiation factor 2 subunit 2	-0.239278	0.106482
Dhrs4	Q99LB2	Dehydrogenase/reductase SDR family member 4	0.404932	0.659989
Sardh	Q99LB7	Sarcosine dehydrogenase, mitochondrial	0.0798721	0.201562
Ndufa10	Q99LC3	NADH dehydrogenase [ubiquinone] 1 alpha subcomplex subunit 10, mitochondrial	0.320872	0.933957
Etfa	Q99LC5	Electron transfer flavoprotein subunit alpha, mitochondrial	0.0660229	0.393932
Ddah2	Q99LD8;O08972	N(G),N(G)-dimethylarginine dimethylaminohydrolase 2	-0.276464	0.331528
D10Wsu52e	Q99LF4	tRNA-splicing ligase RtcB homolog	0.0846987	0.20849
Grpel1	Q99LP6	GrpE protein homolog 1, mitochondrial	-0.0706425	0.0988946
Dpy30	Q99LT0	Protein dpy-30 homolog	-1.28052	0.692399
Park7	Q99LX0;A2A813;A2A815	Protein DJ-1	-0.221637	1.1312
Dnaja3	Q99M87	DnaJ homolog subfamily A member 3, mitochondrial	-0.230223	0.314888
Kars	Q99MN1;Q8R2P8	Lysine--tRNA ligase	-0.228091	0.141827
Pccb	Q99MN9;E9Q1J7	Propionyl-CoA carboxylase beta chain, mitochondrial	0.0273738	0.161202
Srrt	Q99MR6	Serrate RNA effector molecule homolog	-0.0941062	0.137749
Mccc1	Q99MR8	Methylcrotonoyl-CoA carboxylase subunit alpha, mitochondrial	0.0668693	0.164032
Hsd17b10	Q99N15;A2AFQ2;O08756	3-hydroxyacyl-CoA dehydrogenase type-2	0.065845	0.200392
Acss1	Q99NB1	Acetyl-coenzyme A synthetase 2-like, mitochondrial	0.183056	0.437138
Arhgdia	Q99PT1	Rho GDP-dissociation inhibitor 1	-0.376647	0.643716
Ndufa5	Q9CPP6	NADH dehydrogenase [ubiquinone] 1 alpha subcomplex subunit 5	-0.128167	0.205422
Cox6c	Q9CPQ1	Cytochrome c oxidase subunit 6C	0.342148	1.30092
Atp5l	Q9CPQ8	ATP synthase subunit g, mitochondrial	-1.4785	0.719246	+
Mgst3	Q9CPU4	Microsomal glutathione S-transferase 3	0.335004	0.138397
Glod4	Q9CPV4;E9Q197;F6ZTG3	Glyoxalase domain-containing protein 4	0.0795121	0.416085
Atg3	Q9CPX6	Ubiquitin-like-conjugating enzyme ATG3	-0.298667	0.475452
Lap3	Q9CPY7	Cytosol aminopeptidase	0.0583701	0.0801174
Rnaset2	Q9CQ01	Ribonuclease T2	0.303893	0.973042
Ndufc2	Q9CQ54	NADH dehydrogenase [ubiquinone] 1 subunit C2	0.0491357	0.0624912
Pgls	Q9CQ60;D3Z4X1;Q8CBG6	6-phosphogluconolactonase	-0.0133996	0.0159513
Decr1	Q9CQ62	2,4-dienoyl-CoA reductase, mitochondrial	-0.0569029	0.0847661
Mtap	Q9CQ65	S-methyl-5-thioadenosine phosphorylase	-0.782464	0.686014
Uqcrq	Q9CQ69	Cytochrome b-c1 complex subunit 8	0.355851	0.787695
Ndufa2	Q9CQ75	NADH dehydrogenase [ubiquinone] 1 alpha subcomplex subunit 2	2.00965	0.941703	+
Fis1	Q9CQ92;G3X9U9	Mitochondrial fission 1 protein	0.165874	0.382913
Sdhb	Q9CQA3	Succinate dehydrogenase [ubiquinone] iron-sulfur subunit, mitochondrial	-0.101204	0.300891
Uqcrb	Q9D855;Q9CQB4	Cytochrome b-c1 complex subunit 7	0.110189	0.155221
Sar1b	Q9CQC9	GTP-binding protein SAR1b	1.10038	0.838399
Gm10704	Q9CQE8;J3QNB0	UPF0568 protein C14orf166 homolog	0.296948	0.64779
Btf3l4	Q9CQH7	Transcription factor BTF3 homolog 4	-0.805583	0.563934
Gmfb;Gmfg	Q9CQI3;D3Z2F6;D3YY16;Q9ERL7	Glia maturation factor beta;Glia maturation factor gamma	-0.67633	0.501101
Cotl1	Q9CQI6	Coactosin-like protein	-0.307267	1.0294
Ndufb9	Q9CQJ8	NADH dehydrogenase [ubiquinone] 1 beta subcomplex subunit 9	-0.384054	0.256838
Txndc17	Q9CQM5	Thioredoxin domain-containing protein 17	-0.402208	0.352734
Trap1	Q9CQN1	Heat shock protein 75 kDa, mitochondrial	0.319609	1.12587
Atp5f1	Q9CQQ7	ATP synthase subunit b, mitochondrial	0.204998	0.594646
Rps21	Q9CQR2	40S ribosomal protein S21	0.00483608	0.0172324
Acot13	Q9CQR4	Acyl-coenzyme A thioesterase 13	0.24488	0.934975
Sec61b;Gm10320	Q9CQS8;E9PW43	Protein transport protein Sec61 subunit beta	0.30647	0.926578
Ywhab	Q9CQV8;A2A5N1	14-3-3 protein beta/alpha;14-3-3 protein beta/alpha, N-terminally processed	-0.227328	1.13581
Mrps36	Q9CQX8;Q9D6T9	28S ribosomal protein S36, mitochondrial	0.167521	0.471527
Ndufa6	Q9CQZ5	NADH dehydrogenase [ubiquinone] 1 alpha subcomplex subunit 6	0.164215	0.27557
Ndufb3	Q9CQZ6	NADH dehydrogenase [ubiquinone] 1 beta subcomplex subunit 3	0.66057	1.88125
Atp6v1g1	Q9CR51	V-type proton ATPase subunit G 1	-0.151093	0.454563
Slc25a11	Q9CR62;Q5SX46	Mitochondrial 2-oxoglutarate/malate carrier protein	0.524739	0.547992
Uqcrfs1	Q9CR68	Cytochrome b-c1 complex subunit Rieske, mitochondrial;Cytochrome b-c1 complex subunit 11	0.463425	0.703141
Fam136a	Q9CR98	Protein FAM136A	-0.0307646	0.0668864
Chchd3	Q9CRB9;Q9D9P1;D3Z0L4;S4R238;F6QFL0	Coiled-coil-helix-coiled-coil-helix domain-containing protein 3, mitochondrial	0.184756	0.639607
Emc2	Q9CRD2	ER membrane protein complex subunit 2	0.035974	0.12837
Prps2	Q9CS42	Ribose-phosphate pyrophosphokinase 2	-1.16949	1.11563	+
Atic	Q9CWJ9	Bifunctional purine biosynthesis protein PURH;Phosphoribosylaminoimidazolecarboxamide formyltransferase;IMP cyclohydrolase	-0.134156	0.494711
Snx2	Q9CWK8	Sorting nexin-2	-0.380707	1.533
Ddah1	Q9CWS0;D3YU15	N(G),N(G)-dimethylarginine dimethylaminohydrolase 1	-0.173408	0.40776
Hnrnpa0	Q9CX86	Heterogeneous nuclear ribonucleoprotein A0	-0.550968	0.302899
Cenpv	Q9CXS4	Centromere protein V	-0.210429	0.409452
Ilf2	Q9CXY6	Interleukin enhancer-binding factor 2	0.326568	1.93216
Serbp1	Q9CY58	Plasminogen activator inhibitor 1 RNA-binding protein	0.167252	0.359724
Blvra	Q9CY64	Biliverdin reductase A	-0.239203	0.847813
Uqcrc1	Q9CZ13	Cytochrome b-c1 complex subunit 1, mitochondrial	0.0652833	0.173027
Nsfl1c	Q9CZ44;A2AT02	NSFL1 cofactor p47	-0.269291	0.634951
Sdhc	Q9CZB0;D3Z1A8;F8WGB3	Succinate dehydrogenase cytochrome b560 subunit, mitochondrial	0.00464106	0.00513885
Shmt2	Q9CZN7	Serine hydroxymethyltransferase	0.185929	0.373386
Tsfm	Q9CZR8;Q9CX33	Elongation factor Ts, mitochondrial	0.144089	0.249987
Cs	Q9CZU6	Citrate synthase, mitochondrial	0.586658	3.11586
Rsu1	Q9D031;A2AUR7;Q01730	Ras suppressor protein 1	-0.0388002	0.0533092
Pdhb	Q9D051	Pyruvate dehydrogenase E1 component subunit beta, mitochondrial	0.330474	2.17486
Hnrnpm	Q9D0E1;B8JK33;B8JK32	Heterogeneous nuclear ribonucleoprotein M	-0.0530801	0.16436
Pgm1;Pgm2	Q9D0F9;A2CEK3	Phosphoglucomutase-1	0.0143471	0.0753775
Rars	Q9D0I9	Arginine--tRNA ligase, cytoplasmic	1.07759	0.39443
Ptms	Q9D0J8	Parathymosin	-0.176302	0.247961
Oxct1	Q9D0K2;Q3UJQ9	Succinyl-CoA:3-ketoacid coenzyme A transferase 1, mitochondrial;Succinyl-CoA:3-ketoacid-coenzyme A transferase	0.127811	0.44718
Cyc1	Q9D0M3	Cytochrome c1, heme protein, mitochondrial	0.21986	0.350399
Tars	Q9D0R2	Threonine--tRNA ligase, cytoplasmic	0.499898	0.257759
Hint2	Q9D0S9	Histidine triad nucleotide-binding protein 2, mitochondrial	0.0935254	0.178358
D10Jhu81e	Q9D172	ES1 protein homolog, mitochondrial	-0.0359945	0.135774
Cndp2	Q9D1A2	Cytosolic non-specific dipeptidase	-0.220275	0.871319
Tmed10	Q9D1D4	Transmembrane emp24 domain-containing protein 10	0.0475001	0.0548995
Rab1b	Q9D1G1	Ras-related protein Rab-1B	1.08431	0.518868
Atp6v1f	Q9D1K2;F7B2B4	V-type proton ATPase subunit F	0.300991	0.892511
Sec13	Q9D1M0	Protein SEC13 homolog	-0.0422096	0.0454067
Erp44	Q9D1Q6	Endoplasmic reticulum resident protein 44	0.142296	0.278933
Dlst	Q9D2G2	Dihydrolipoyllysine-residue succinyltransferase component of 2-oxoglutarate dehydrogenase complex, mitochondrial	0.0826006	0.230472
Aacs	Q9D2R0	Acetoacetyl-CoA synthetase	-0.249217	0.128935
Atp5d	Q9D3D9	ATP synthase subunit delta, mitochondrial	0.263112	0.478903
Oxsm	Q9D404	3-oxoacyl-[acyl-carrier-protein] synthase, mitochondrial	-0.561929	0.73622
Ndufb8	Q9D6J5;F6VCY0;E9Q9J5;Q3V406	NADH dehydrogenase [ubiquinone] 1 beta subcomplex subunit 8, mitochondrial	0.0975423	0.0694693
Ndufv2	Q9D6J6	NADH dehydrogenase [ubiquinone] flavoprotein 2, mitochondrial	-0.401155	0.320521
Idh3a	Q9D6R2	Isocitrate dehydrogenase [NAD] subunit alpha, mitochondrial	0.0196428	0.0376031
Msra	Q9D6Y7	Mitochondrial peptide methionine sulfoxide reductase	-0.091495	0.256371
Armc1	Q9D7A8	Armadillo repeat-containing protein 1	0.443434	0.223491
Acad8	Q9D7B6;D3YTT4	Isobutyryl-CoA dehydrogenase, mitochondrial	-0.080266	0.11722
Echdc3	Q9D7J9	Enoyl-CoA hydratase domain-containing protein 3, mitochondrial	0.605978	0.801558
Chmp5	Q9D7S9	Charged multivesicular body protein 5	-0.685635	0.391169
Ggct	Q9D7X8	Gamma-glutamylcyclotransferase	0.198848	0.528192
Ppa1	Q9D819	Inorganic pyrophosphatase	1.25675	0.416688
Pipox	Q9D826	Peroxisomal sarcosine oxidase	0.495236	0.973168
U2af1	Q9D883;G3UW94	Splicing factor U2AF 35 kDa subunit	0.352111	0.173523
Rpl4	Q9D8E6	60S ribosomal protein L4	0.51029	0.781591
Glod5	Q9D8I3	Glyoxalase domain-containing protein 5	-0.010601	0.0164548
Eef1g	Q9D8N0	Elongation factor 1-gamma	0.0254822	0.0280193
Snx5	Q9D8U8	Sorting nexin-5	0.0581579	0.151467
Psmd12	Q9D8W5;Q3TRH2;B1AT36	26S proteasome non-ATPase regulatory subunit 12	0.35106	0.142299
Sult1c2	Q9D939	Sulfotransferase 1C2	-0.691313	2.58077
Gatm	Q9D964	Glycine amidinotransferase, mitochondrial	0.339857	0.57015
Phpt1	Q9DAK9	14 kDa phosphohistidine phosphatase	-0.301503	0.23398
Gng12	Q9DAS9	Guanine nucleotide-binding protein G(I)/G(S)/G(O) subunit gamma-12	0.109538	0.122467
Cnn3	Q9DAW9	Calponin-3	-0.814651	2.37818
Mrpl12	Q9DB15	39S ribosomal protein L12, mitochondrial	-0.0803614	0.129276
Atp5o	Q9DB20	ATP synthase subunit O, mitochondrial	0.27221	1.03147
Iah1	Q9DB29	Isoamyl acetate-hydrolyzing esterase 1 homolog	-0.30252	0.313568
Uqcrc2	Q9DB77	Cytochrome b-c1 complex subunit 2, mitochondrial	0.284124	1.23449
Csad	Q9DBE0	Cysteine sulfinic acid decarboxylase	-0.264266	0.344016
Aldh7a1	Q9DBF1;G3UYR8	Alpha-aminoadipic semialdehyde dehydrogenase	0.00960302	0.0372991
Ap2b1	Q9DBG3;H3BIY9;H3BKM0	AP-2 complex subunit beta	-0.346865	1.0251
Pgam1	Q9DBJ1	Phosphoglycerate mutase 1	0.264258	0.704989
Acot12	Q9DBK0	Acyl-coenzyme A thioesterase 12	0.430485	1.98535
Acadsb	Q9DBL1;E9Q5L3	Short/branched chain specific acyl-CoA dehydrogenase, mitochondrial	0.297097	0.20951
Coasy	Q9DBL7	Bifunctional coenzyme A synthase;Phosphopantetheine adenylyltransferase;Dephospho-CoA kinase	-0.126999	0.201315
Ehhadh	Q9DBM2	Peroxisomal bifunctional enzyme;Enoyl-CoA hydratase/3,2-trans-enoyl-CoA isomerase;3-hydroxyacyl-CoA dehydrogenase	1.10086	2.51076	+
Cmpk1	Q9DBP5	UMP-CMP kinase	0.110601	0.949912
Ppp1r12a	Q9DBR7	Protein phosphatase 1 regulatory subunit 12A	-0.139773	0.116541
Dmgdh	Q9DBT9	Dimethylglycine dehydrogenase, mitochondrial	-0.0133958	0.0550782
Susd2	Q9DBX3	Sushi domain-containing protein 2	-0.0228796	0.0190504
Eif3k	Q9DBZ5	Eukaryotic translation initiation factor 3 subunit K	-0.251927	0.285137
Crot	Q9DC50	Peroxisomal carnitine O-octanoyltransferase	1.22649	2.86717	+
Ndufa9	Q9DC69	NADH dehydrogenase [ubiquinone] 1 alpha subcomplex subunit 9, mitochondrial	0.1441	0.968129
Ndufs7	Q9DC70	NADH dehydrogenase [ubiquinone] iron-sulfur protein 7, mitochondrial	0.370084	0.584423
Pycrl	Q9DCC4	Pyrroline-5-carboxylate reductase 3	-0.0693345	0.0799035
Pgd	Q9DCD0	6-phosphogluconate dehydrogenase, decarboxylating	-0.0640731	0.098692
Eif3f	Q9DCH4	Eukaryotic translation initiation factor 3 subunit F	0.280919	1.20463
Ndufa8	Q9DCJ5	NADH dehydrogenase [ubiquinone] 1 alpha subcomplex subunit 8	0.11632	0.0502693
Npl	Q9DCJ9	N-acetylneuraminate lyase	0.231966	0.136383
Paics	Q9DCL9	Multifunctional protein ADE2;Phosphoribosylaminoimidazole-succinocarboxamide synthase;Phosphoribosylaminoimidazole carboxylase	-0.116041	0.664583
Ethe1	Q9DCM0	Protein ETHE1, mitochondrial	-0.40604	0.941521
Gstk1	Q9DCM2	Glutathione S-transferase kappa 1	0.504512	1.47911
Nudt12	Q9DCN1	Peroxisomal NADH pyrophosphatase NUDT12	0.124365	0.311103
Cyb5r3	Q9DCN2;F2Z456;F2Z3V0	NADH-cytochrome b5 reductase 3;NADH-cytochrome b5 reductase 3 membrane-bound form;NADH-cytochrome b5 reductase 3 soluble form	0.214443	0.477032
0610011F06Rik	Q9DCS2;E9Q5B2;G5E8X1;E9Q7K5;D3YZM4	UPF0585 protein C16orf13 homolog	0.333249	0.720521
Mecr	Q9DCS3;A2A845	Trans-2-enoyl-CoA reductase, mitochondrial	0.162095	0.421853
Ndufb10	Q9DCS9;D3YUK4	NADH dehydrogenase [ubiquinone] 1 beta subcomplex subunit 10	0.207642	0.701556
Ndufs3	Q9DCT2	NADH dehydrogenase [ubiquinone] iron-sulfur protein 3, mitochondrial	0.0355763	0.0455936
Crip2	Q9DCT8	Cysteine-rich protein 2	-0.842892	0.432903
Rmdn1	Q9DCV4	Regulator of microtubule dynamics protein 1	0.658329	0.714828
Etfb	Q9DCW4	Electron transfer flavoprotein subunit beta	0.0351806	0.135587
Keg1	Q9DCY0;D3Z4V9;D3Z1F5	Glycine N-acyltransferase-like protein Keg1	0.522544	1.24349
Gmpr	Q9DCZ1;F6VY18	GMP reductase 1	-0.0539761	0.0692152
Mettl7b	Q9DD20	Methyltransferase-like protein 7B	-0.112727	0.0869966
Sacm1l	Q9EP69	Phosphatidylinositide phosphatase SAC1	-0.15237	0.0895014
Lactb	Q9EP89	Serine beta-lactamase-like protein LACTB, mitochondrial	-0.154033	0.097005
Acox3	Q9EPL9;Q8C178;E9Q296	Peroxisomal acyl-coenzyme A oxidase 3;Acyl-coenzyme A oxidase	0.978037	2.39063	+
Hsd17b11	Q9EQ06	Estradiol 17-beta-dehydrogenase 11	-0.0144634	0.0057928
Aldh6a1	Q9EQ20	Methylmalonate-semialdehyde dehydrogenase [acylating], mitochondrial	0.147127	0.318436
Vps35	Q9EQH3	Vacuolar protein sorting-associated protein 35	-0.0693831	0.174838
Ehd4	Q9EQP2	EH domain-containing protein 4	-0.142964	0.428708
Lima1	Q9ERG0	LIM domain and actin-binding protein 1	-0.630502	0.774624
Scamp2	Q9ERN0	Secretory carrier-associated membrane protein 2	0.74224	0.738853
Ndufa13	Q9ERS2	NADH dehydrogenase [ubiquinone] 1 alpha subcomplex subunit 13	-0.127818	0.0294632
Ppp1r1a	Q9ERT9	Protein phosphatase 1 regulatory subunit 1A	-0.320556	0.401895
Tmem27	Q9ESG4	Collectrin	-0.992094	0.443124
Anp32b	Q9EST5	Acidic leucine-rich nuclear phosphoprotein 32 family member B	-0.466295	0.217096
Pygl	Q9ET01;Q3UEJ6	Glycogen phosphorylase, liver form;Phosphorylase	-0.128258	0.372342
Dpp7	Q9ET22	Dipeptidyl peptidase 2	0.403489	0.222421
Palld;Mypn	Q9ET54;Q5DTJ9	Palladin;Myopalladin	-0.077467	0.102659
Ivd	Q9JHI5	Isovaleryl-CoA dehydrogenase, mitochondrial	0.0249977	0.0864486
Tmod3	Q9JHJ0	Tropomodulin-3	-0.47011	1.2465
Dync1h1	Q9JHU4	Cytoplasmic dynein 1 heavy chain 1	0.0302768	0.0685333
Nit2	Q9JHW2	Omega-amidase NIT2	-0.0841618	0.253626
Copb1	Q9JIF7	Coatomer subunit beta	0.00435591	0.0112462
Akr1a1	Q9JII6;B1AXW3	Alcohol dehydrogenase [NADP(+)]	-0.12308	0.551528
Pdzk1	Q9JIL4	Na(+)/H(+) exchange regulatory cofactor NHE-RF3	0.352433	1.0352
Rpl38	Q9JJI8	60S ribosomal protein L38	-0.0155988	0.0149542
Uchl3;Uchl4	Q9JKB1;P58321	Ubiquitin carboxyl-terminal hydrolase isozyme L3;Ubiquitin carboxyl-terminal hydrolase isozyme L4	-0.163996	0.0602998
Iqgap1	Q9JKF1	Ras GTPase-activating-like protein IQGAP1	-1.13534	1.04598
Hyou1	Q9JKR6	Hypoxia up-regulated protein 1	0.461809	1.21594
Arl6ip1	Q9JKW0	ADP-ribosylation factor-like protein 6-interacting protein 1	-0.0656071	0.0316303
Mpp6	Q9JLB0;E9Q2R8;E9PWC5	MAGUK p55 subfamily member 6	-1.03665	0.670954
Cubn	Q9JLB4	Cubilin	-0.0336919	0.110243
Scly	Q9JLI6;D3Z7G6;F6ZFP8	Selenocysteine lyase	0.00532532	0.0100898
Aldh9a1	Q9JLJ2;Q3U367	4-trimethylaminobutyraldehyde dehydrogenase	-0.0686817	0.133034
Auh	Q9JLZ3;F6RT60;F6R307	Methylglutaconyl-CoA hydratase, mitochondrial	0.148515	0.120924
Arpc3	Q9JM76;H7BWZ3	Actin-related protein 2/3 complex subunit 3	-0.726601	0.683612
Txnrd1	Q9JMH6	Thioredoxin reductase 1, cytoplasmic	0.572867	1.19384
Hao2	Q9NYQ2	Hydroxyacid oxidase 2	-1.30023	1.72515	+
Glrx	Q9QUH0	Glutaredoxin-1	-0.187026	0.0619214
Rhoa	Q9QUI0	Transforming protein RhoA	-0.826023	0.369934
Psma6	Q9QUM9;E0CXB1	Proteasome subunit alpha type-6	-0.07375	0.061406
Prep	Q9QUR6	Prolyl endopeptidase	-0.00800562	0.00440378
Acox2	Q9QXD1	Peroxisomal acyl-coenzyme A oxidase 2	1.05894	3.11591	+
Fbp1	Q9QXD6	Fructose-1,6-bisphosphatase 1	0.0389566	0.0813789
Miox	Q9QXN5	Inositol oxygenase	-0.459104	1.56029
Cnpy2	Q9QXT0	Protein canopy homolog 2	-0.164869	0.409968
Slc25a13	Q9QXX4	Calcium-binding mitochondrial carrier protein Aralar2	0.457045	0.918942
Ehd3	Q9QXY6	EH domain-containing protein 3	0.330201	0.448247
Clic4	Q9QYB1	Chloride intracellular channel protein 4	-0.128084	0.523019
Add3	Q9QYB5	Gamma-adducin	0.109402	0.113412
Dnaja2	Q9QYJ0	DnaJ homolog subfamily A member 2	-0.30998	0.875585
Acot2	Q9QYR9	Acyl-coenzyme A thioesterase 2, mitochondrial	-0.940532	0.399846
Slc25a10	Q9QZD8	Mitochondrial dicarboxylate carrier	1.43643	1.28236	+
Eif3i	Q9QZD9;A2AE03	Eukaryotic translation initiation factor 3 subunit I	-0.0273986	0.0312627
Copg1	Q9QZE5	Coatomer subunit gamma-1	-0.197787	0.415145
Ubqln2	Q9QZM0	Ubiquilin-2	0.269112	0.32228
H2afy	Q9QZQ8	Core histone macro-H2A.1	-0.501924	0.702644
Dnajc12	Q9R022	DnaJ homolog subfamily C member 12	-0.58221	0.416896
Acox1	Q9R0H0	Peroxisomal acyl-coenzyme A oxidase 1	1.04718	2.03717	+
Tpk1	Q9R0M5	Thiamin pyrophosphokinase 1	-0.00642586	0.0142562
Galk1	Q9R0N0	Galactokinase	-0.254126	0.679869
Dstn	Q9R0P5	Destrin	-0.313529	1.3763
Arpc1a	Q9R0Q6;D3YVI5	Actin-related protein 2/3 complex subunit 1A	0.330432	0.501633
Acot9;Acot10	Q9R0X4;Q32MW3	Acyl-coenzyme A thioesterase 9, mitochondrial;Acyl-coenzyme A thioesterase 10, mitochondrial	-0.223126	0.283073
Ak1	Q9R0Y5	Adenylate kinase isoenzyme 1	-0.0881219	0.0731099
Sqrdl	Q9R112;F6ZKZ3	Sulfide:quinone oxidoreductase, mitochondrial	0.384328	1.12783
Psmb3	Q9R1P1	Proteasome subunit beta type-3	-0.0359607	0.0284188
Psmb2	Q9R1P3	Proteasome subunit beta type-2	0.225059	0.57894
Psma1	Q9R1P4	Proteasome subunit alpha type-1	0.0234265	0.0550449
Tmem176b	Q9R1Q6	Transmembrane protein 176B	-0.881428	1.7852
Hebp1	Q9R257	Heme-binding protein 1	0.230125	0.270117
Myo1c	Q9WTI7	Unconventional myosin-Ic	-0.257902	0.271206
Ak2	Q9WTP6	Adenylate kinase 2, mitochondrial	-0.0126848	0.0279758
Ak3	Q9WTP7	GTP:AMP phosphotransferase AK3, mitochondrial	0.271251	2.14279
Skp1	Q9WTX5	S-phase kinase-associated protein 1	-0.12686	0.128167
Pdcd6ip	Q9WU78	Programmed cell death 6-interacting protein	0.0504308	0.136586
Prodh	Q9WU79	Proline dehydrogenase 1, mitochondrial	-0.156312	0.551556
Farsb	Q9WUA2	Phenylalanine--tRNA ligase beta subunit	-0.142262	0.313026
Eif4h	Q9WUK2	Eukaryotic translation initiation factor 4H	-0.221624	0.248074
Coro1c	Q9WUM4	Coronin-1C	-0.127171	0.241383
Suclg1	Q9WUM5	Succinyl-CoA ligase [ADP/GDP-forming] subunit alpha, mitochondrial	0.128227	0.141193
Tinag	Q9WUR0		0.727684	0.518927
Ak4	Q9WUR9	GTP:AMP phosphotransferase AK4, mitochondrial	0.217474	0.318628
Ctsz	Q9WUU7	Cathepsin Z	-0.825727	2.31835
Arpc1b	Q9WV32	Actin-related protein 2/3 complex subunit 1B	-1.32038	0.728234
Asah1	Q9WV54	Acid ceramidase;Acid ceramidase subunit alpha;Acid ceramidase subunit beta	-0.654411	2.94303
Decr2	Q9WV68	Peroxisomal 2,4-dienoyl-CoA reductase	0.907352	0.775251
Epb41l3	Q9WV92	Band 4.1-like protein 3	0.204157	0.46504
Timm9	Q9WV98	Mitochondrial import inner membrane translocase subunit Tim9	0.149962	0.382535
Timm8a1;Timm8a2	Q9WVA2;Q4FZG7	Mitochondrial import inner membrane translocase subunit Tim8 A;Putative mitochondrial import inner membrane translocase subunit Tim8 A-B	-0.531423	0.835172
Bub3	Q9WVA3	Mitotic checkpoint protein BUB3	-0.608667	1.18591
Tagln2	Q9WVA4	Transgelin-2	-0.385087	0.534456
Pacsin2	Q9WVE8	Protein kinase C and casein kinase substrate in neurons protein 2	-0.342814	0.920076
Ehd1	Q9WVK4	EH domain-containing protein 1	-0.018013	0.0548666
Gstz1	Q9WVL0	Maleylacetoacetate isomerase	0.136395	0.476884
Aadat	Q9WVM8	Kynurenine/alpha-aminoadipate aminotransferase, mitochondrial	0.39027	1.34179
Lipa	Q9Z0M5	Lysosomal acid lipase/cholesteryl ester hydrolase	-0.265346	0.208821
Eif2s3x;Eif2s3y	Q9Z0N1;Q9Z0N2	Eukaryotic translation initiation factor 2 subunit 3, X-linked;Eukaryotic translation initiation factor 2 subunit 3, Y-linked	-0.281492	0.925652
Bpnt1	Q9Z0S1;D3Z0E6	3(2),5-bisphosphate nucleotidase 1	0.0527654	0.255033
Aifm1	Q9Z0X1;B1AU25	Apoptosis-inducing factor 1, mitochondrial	0.131412	0.311771
Atp6v1c1	Q9Z1G3	V-type proton ATPase subunit C 1	-0.138857	0.119764
Nfs1	Q9Z1J3	Cysteine desulfurase, mitochondrial	-0.279126	0.749571
Ddx39b	Q9Z1N5;G3UXI6	Spliceosome RNA helicase Ddx39b	0.199012	0.0694206
Ndufa7	Q9Z1P6	NADH dehydrogenase [ubiquinone] 1 alpha subcomplex subunit 7	0.147746	0.245353
Clic1	Q9Z1Q5	Chloride intracellular channel protein 1	-0.188202	0.415141
Uso1	Q9Z1Z0	General vesicular transport factor p115	0.0289588	0.0762214
Strap	Q9Z1Z2	Serine-threonine kinase receptor-associated protein	0.0512528	0.109558
Hnrnpc	Q9Z204	Heterogeneous nuclear ribonucleoproteins C1/C2	-0.561678	1.3503
Mecp2	Q9Z2D6	Methyl-CpG-binding protein 2	-0.245287	0.592785
Gipc2	Q9Z2H7	PDZ domain-containing protein GIPC2	-0.66391	0.368944
Letm1	Q9Z2I0	LETM1 and EF-hand domain-containing protein 1, mitochondrial	0.20094	0.237324
Suclg2	Q9Z2I8	Succinyl-CoA ligase [GDP-forming] subunit beta, mitochondrial	-0.0472894	0.0889507
Sucla2	Q9Z2I9	Succinyl-CoA ligase [ADP-forming] subunit beta, mitochondrial	0.334837	1.00624
Pmm2	Q9Z2M7	Phosphomannomutase 2	0.493767	0.293527
Psma7;Psma8	Q9Z2U0;Q9CWH6	Proteasome subunit alpha type-7;Proteasome subunit alpha type-7-like	-0.162663	0.271802
Psma5;Gm8394	Q9Z2U1;D3YX79	Proteasome subunit alpha type-5;Proteasome subunit alpha type	-0.320145	1.22448
Pck1	Q9Z2V4	Phosphoenolpyruvate carboxykinase, cytosolic [GTP]	1.01327	1.76333	+
Dnpep	Q9Z2W0	Aspartyl aminopeptidase	-0.0836797	0.32558
Hnrnpf;Gm6430	Q9Z2X1;J3QMQ5;J3QMT0;J3QM80	Heterogeneous nuclear ribonucleoprotein F;Heterogeneous nuclear ribonucleoprotein F, N-terminally processed	-0.221069	0.860271
Prosc	Q9Z2Y8	Proline synthase co-transcribed bacterial homolog protein	-0.843687	0.506532

## Sheet: intensities
Data Set 1 - List and annotation of quantified proteins
LFQ intensity 141031_1_0138-141022FaBrS01TQ	LFQ intensity 141031_1_0138-141022FaBrS02TQ	LFQ intensity 141031_1_0138-141022FaBrS03TQ	LFQ intensity 141031_1_0138-141022FaBrS04TQ	LFQ intensity 141031_1_0138-141022FaBrS05TQ	LFQ intensity 141031_1_0138-141022FaBrS06TQ	LFQ intensity 141031_1_0138-141022FaBrS07TQ	LFQ intensity 141031_1_0138-141022FaBrS08TQ	LFQ intensity 141031_1_0138-141022FaBrS09TQ	LFQ intensity 141031_1_0138-141022FaBrS10TQ	LFQ intensity 141031_1_0138-141022FaBrS11TQ	LFQ intensity 141031_1_0138-141022FaBrS12TQ	Only identified by site	Reverse	Contaminant	GOBP name	GOMF name	GOCC name	GOBP slim name	GOCC slim name	KEGG name	Pfam	GSEA	Keywords	Corum	GOBP	GOMF	GOCC	GOBP slim	GOCC slim	Significant	t-test Significant_14vs96	PEP	Intensity	Test statistic	#NAME?	t-test Difference_14vs96	Protein IDs	Majority protein IDs	Protein names	Gene names
24.0899	25.4689	26.0368	25.5794	25.7626	24.2033	25.5553	25.7627	26.7874	25.8153	25.5857	26.5846				actin crosslink formation;actin cytoskeleton organization;actin filament bundle assembly;actin filament organization;actin filament-based process;biological regulation;cell junction assembly;cell junction organization;cell-substrate junction assembly;cellular component assembly;cellular component assembly at cellular level;cellular component organization;cellular component organization at cellula…	actin binding;actin filament binding;binding;calcium ion binding;cation binding;cytoskeletal protein binding;identical protein binding;ion binding;metal ion binding;protein binding;protein dimerization activity;protein homodimerization activity	actin filament bundle;actomyosin;adherens junction;anchoring junction;cell cortex part;cell junction;cell part;cell projection;cell projection part;cell-cell adherens junction;cell-cell junction;cell-substrate adherens junction;cell-substrate junction;contractile fiber part;cortical cytoskeleton;cytoplasmic part;cytoplasmic vesicle membrane;cytoplasmic vesicle part;cytoskeletal part;cytoskeleton;…	biological regulation;cell junction organization;cellular component assembly;cellular component organization;cellular process;cytoskeleton organization;organelle organization	cell part;cell projection;cytoskeleton;intracellular membrane-bounded organelle;intracellular non-membrane-bounded organelle;intracellular organelle;membrane;neuron projection;nucleus;organelle;plasma membrane	Adherens junction;Amoebiasis;Arrhythmogenic right ventricular cardiomyopathy (ARVC);Focal adhesion;Leukocyte transendothelial migration;Regulation of actin cytoskeleton;Systemic lupus erythematosus;Tight junction	CH;EF_hand_4;efhand_Ca_insen;Spectrin	AAGCACA,MIR-218;ADHERENS_JUNCTION;AMIT_EGF_RESPONSE_480_HELA;ATAGGAA,MIR-202;BANDRES_RESPONSE_TO_CARMUSTIN_MGMT_24HR_DN;BANDRES_RESPONSE_TO_CARMUSTIN_MGMT_48HR_DN;BANDRES_RESPONSE_TO_CARMUSTIN_WITHOUT_MGMT_24HR_DN;BANDRES_RESPONSE_TO_CARMUSTIN_WITHOUT_MGMT_48HR_DN;BASOLATERAL_PLASMA_MEMBRANE;BERENJENO_TRANSFORMED_BY_RHOA_UP;BERTUCCI_MEDULLARY_VS_DUCTAL_BREAST_CANCER_DN;BIDUS_METASTASIS_DN;BIOCART…	Acetylation;Actin-binding;Calcium;Cellmembrane;Cellprojection;Completeproteome;Cytoplasm;Cytoskeleton;Membrane;Metal-binding;Phosphoprotein;Referenceproteome;Repeat	Psd3-Actn1 complex	GO:0006996;GO:0007010;GO:0007015;GO:0007044;GO:0009987;GO:0016043;GO:0022607;GO:0030029;GO:0030036;GO:0030865;GO:0032879;GO:0034329;GO:0034330;GO:0048041;GO:0048519;GO:0048523;GO:0050789;GO:0050794;GO:0051017;GO:0051270;GO:0051271;GO:0051764;GO:0065007;GO:0071840;GO:0071841;GO:0071842;GO:0071844	GO:0003779;GO:0005488;GO:0005509;GO:0005515;GO:0008092;GO:0042802;GO:0042803;GO:0043167;GO:0043169;GO:0046872;GO:0046983;GO:0051015	GO:0001725;GO:0001726;GO:0005634;GO:0005856;GO:0005886;GO:0005911;GO:0005912;GO:0005913;GO:0005916;GO:0005924;GO:0005925;GO:0012506;GO:0016020;GO:0030018;GO:0030054;GO:0030055;GO:0030659;GO:0030667;GO:0030863;GO:0031090;GO:0032127;GO:0032432;GO:0042641;GO:0042995;GO:0043005;GO:0043197;GO:0043226;GO:0043227;GO:0043228;GO:0043229;GO:0043231;GO:0043232;GO:0044309;GO:0044422;GO:0044424;GO:0044430;GO:…	GO:0006996;GO:0007010;GO:0009987;GO:0016043;GO:0022607;GO:0034330;GO:0065007	GO:0005634;GO:0005856;GO:0005886;GO:0016020;GO:0042995;GO:0043005;GO:0043226;GO:0043229;GO:0043231;GO:0043232;GO:0044464			2.245e-122	388490000	-0.591191	0.934653	-0.872269	A1BN54;Q7TPR4	A1BN54;Q7TPR4	Alpha-actinin-1	Actn1
26.0165	25.4333	25.9791	25.5203	24.1746	25.9028	25.6504	25.7338	25.1969	25.7984	23.5699	25.7029				biosynthetic process;cellular biosynthetic process;cellular macromolecule biosynthetic process;cellular macromolecule metabolic process;cellular metabolic process;cellular process;cellular protein metabolic process;macromolecule biosynthetic process;macromolecule metabolic process;metabolic process;primary metabolic process;protein metabolic process;translation	structural constituent of ribosome;structural molecule activity	cell part;cytosolic large ribosomal subunit;intracellular organelle part;intracellular part;large ribosomal subunit;macromolecular complex;organelle part;ribonucleoprotein complex	biosynthetic process;cellular metabolic process;cellular process;macromolecule metabolic process;metabolic process;primary metabolic process;protein metabolic process;translation	cell part;macromolecular complex;ribonucleoprotein complex	Ribosome	Ribosomal_L19e	ACEVEDO_NORMAL_TISSUE_ADJACENT_TO_LIVER_TUMOR_DN;BENPORATH_MYC_MAX_TARGETS;BENPORATH_MYC_TARGETS_WITH_EBOX;BIOSYNTHETIC_PROCESS;CACGTG_V$MYC_Q2;CAIRO_HEPATOBLASTOMA_CLASSES_UP;CELLULAR_BIOSYNTHETIC_PROCESS;CELLULAR_MACROMOLECULE_METABOLIC_PROCESS;CELLULAR_PROTEIN_METABOLIC_PROCESS;chr17p12;CREIGHTON_ENDOCRINE_THERAPY_RESISTANCE_1;DANG_BOUND_BY_MYC;DANG_MYC_TARGETS_UP;DELACROIX_RARG_BOUND_MEF;ENK_…	3D-structure;Completeproteome;Directproteinsequencing;Phosphoprotein;Referenceproteome;Ribonucleoprotein;Ribosomalprotein	Parvulin-associated pre-rRNP complex	GO:0006412;GO:0008152;GO:0009058;GO:0009059;GO:0009987;GO:0019538;GO:0034645;GO:0043170;GO:0044237;GO:0044238;GO:0044249;GO:0044260;GO:0044267	GO:0003735;GO:0005198	GO:0015934;GO:0022625;GO:0030529;GO:0032991;GO:0044422;GO:0044424;GO:0044446;GO:0044464	GO:0006412;GO:0008152;GO:0009058;GO:0009987;GO:0019538;GO:0043170;GO:0044237;GO:0044238	GO:0030529;GO:0032991;GO:0044464			2.5242e-20	411690000	0.180481	0.177886	0.298384	A2A547;P84099	A2A547;P84099	60S ribosomal protein L19	Rpl19
26.8317	27.184	27.3209	26.9459	26.6748	27.1399	27.2301	26.4641	26.8474	26.9558	26.3134	27.2553				adult behavior;adult locomotory behavior;adult walking behavior;axon cargo transport;axon extension;behavior;biological regulation;cell growth;cell migration;cell motility;cellular component movement;cellular component organization;cellular component organization at cellular level;cellular component organization or biogenesis;cellular component organization or biogenesis at cellular level;cellula…	binding;cytoskeletal protein binding;lipoprotein particle binding;microtubule binding;protein binding;protein-lipid complex binding;tubulin binding	axon;axoneme;cell part;cell projection;cell projection part;cilium axoneme;cilium part;cytoplasmic part;cytoskeletal part;cytosol;growth cone;intracellular membrane-bounded organelle;intracellular organelle;intracellular organelle part;intracellular part;macromolecular complex;membrane;membrane-bounded organelle;microtubule;neuron projection;nuclear part;nuclear periphery;nucleus;organelle;organe…	behavior;biological regulation;cell growth;cell motility;cellular component movement;cellular component organization;cellular process;cytoskeleton organization;cytoskeleton-dependent intracellular transport;developmental process;establishment of localization;growth;locomotion;multicellular organismal process;organelle organization;regulation of organelle organization;regulation of transport;respo…	cell part;cell projection;cytosol;intracellular membrane-bounded organelle;intracellular organelle;macromolecular complex;membrane;neuron projection;nucleus;organelle;plasma membrane;protein complex;site of polarized growth	Alzheimer's disease;MAPK signaling pathway	Tubulin-binding	AGGGCAG,MIR-18A;ANATOMICAL_STRUCTURE_DEVELOPMENT;ANATOMICAL_STRUCTURE_MORPHOGENESIS;ASTON_MAJOR_DEPRESSIVE_DISORDER_DN;AXON;AXONOGENESIS;BENPORATH_EED_TARGETS;BENPORATH_ES_WITH_H3K27ME3;BENPORATH_PRC2_TARGETS;BENPORATH_SUZ12_TARGETS;BHAT_ESR1_TARGETS_VIA_AKT1_UP;BIOCARTA_BIOPEPTIDES_PATHWAY;BIOCARTA_P35ALZHEIMERS_PATHWAY;BROWNE_HCMV_INFECTION_20HR_UP;CACTGCC,MIR-34A,MIR-34C,MIR-449;CAGGTG_V$E12_Q…	Acetylation;Alternativesplicing;Cellmembrane;Cellprojection;Completeproteome;Cytoplasm;Cytoskeleton;Directproteinsequencing;Disulfidebond;Membrane;Microtubule;Phosphoprotein;Referenceproteome;Repeat;Ublconjugation		GO:0000226;GO:0001558;GO:0001764;GO:0006810;GO:0006928;GO:0006996;GO:0007010;GO:0007017;GO:0007018;GO:0007610;GO:0007626;GO:0007628;GO:0008088;GO:0008344;GO:0009894;GO:0009987;GO:0010506;GO:0010638;GO:0010720;GO:0010769;GO:0010970;GO:0010975;GO:0016043;GO:0016049;GO:0016477;GO:0019222;GO:0022603;GO:0022604;GO:0030307;GO:0030516;GO:0030534;GO:0030705;GO:0031110;GO:0031112;GO:0031113;GO:0031116;GO:…	GO:0005488;GO:0005515;GO:0008017;GO:0008092;GO:0015631;GO:0071813;GO:0071814	GO:0005634;GO:0005829;GO:0005874;GO:0005886;GO:0005930;GO:0016020;GO:0030424;GO:0030426;GO:0030427;GO:0032991;GO:0034399;GO:0035085;GO:0042995;GO:0043005;GO:0043226;GO:0043227;GO:0043229;GO:0043231;GO:0043234;GO:0044422;GO:0044424;GO:0044428;GO:0044430;GO:0044441;GO:0044444;GO:0044446;GO:0044463;GO:0044464;GO:0045298	GO:0006810;GO:0006928;GO:0006996;GO:0007010;GO:0007610;GO:0009987;GO:0016043;GO:0016049;GO:0030705;GO:0032501;GO:0032502;GO:0033043;GO:0040007;GO:0040011;GO:0048870;GO:0050896;GO:0051049;GO:0051234;GO:0065007	GO:0005634;GO:0005829;GO:0005886;GO:0016020;GO:0030427;GO:0032991;GO:0042995;GO:0043005;GO:0043226;GO:0043229;GO:0043231;GO:0043234;GO:0044464			3.2292e-16	807490000	0.0269681	0.0443474	0.0342231	B1AQW2;P10637;A2A5Y6	B1AQW2;P10637;A2A5Y6	Microtubule-associated protein tau	Mapt
23.9127	23.9516	24.1138	24.2397	24.0019	24.023	23.4139	23.4453	24.1666	24.3757	23.0968	24.1433				apoptosis;cell death;cellular component organization;cellular component organization at cellular level;cellular component organization or biogenesis;cellular component organization or biogenesis at cellular level;cellular process;chemotaxis;cytoskeleton organization;death;defense response;locomotion;organelle organization;programmed cell death;response to chemical stimulus;response to external st…	actin binding;binding;cytoskeletal protein binding;molecular transducer activity;protein binding;signal transducer activity	cell part;membrane;plasma membrane	cell death;cellular component organization;cellular process;cytoskeleton organization;death;locomotion;organelle organization;response to chemical stimulus;response to external stimulus;response to stimulus;response to stress	cell part;membrane;plasma membrane		Caldesmon	ACTIN_BINDING;ACTIN_CYTOSKELETON;BENPORATH_MYC_MAX_TARGETS;CAGCTG_V$AP4_Q5;CAGGTG_V$E12_Q6;CASTELLANO_NRAS_TARGETS_UP;CCAWWNAAGG_V$SRF_Q4;CELLULAR_DEFENSE_RESPONSE;CHAUHAN_RESPONSE_TO_METHOXYESTRADIOL_DN;CHIARADONNA_NEOPLASTIC_TRANSFORMATION_CDC25_UP;chr11p15;CUI_TCF21_TARGETS_2_UP;CYTOSKELETAL_PROTEIN_BINDING;CYTOSKELETON;DANG_BOUND_BY_MYC;DEFENSE_RESPONSE;DELACROIX_RAR_TARGETS_DN;DELACROIX_RARG…	Acetylation;Alternativesplicing;Cellmembrane;Completeproteome;Directproteinsequencing;Membrane;Phosphoprotein;Referenceproteome		GO:0006915;GO:0006935;GO:0006950;GO:0006952;GO:0006996;GO:0007010;GO:0008219;GO:0009605;GO:0009987;GO:0012501;GO:0016043;GO:0016265;GO:0040011;GO:0042221;GO:0042330;GO:0050896;GO:0071840;GO:0071841;GO:0071842	GO:0003779;GO:0004871;GO:0005488;GO:0005515;GO:0008092;GO:0060089	GO:0005886;GO:0016020;GO:0044464	GO:0006950;GO:0006996;GO:0007010;GO:0008219;GO:0009605;GO:0009987;GO:0016043;GO:0016265;GO:0040011;GO:0042221;GO:0050896	GO:0005886;GO:0016020;GO:0044464			3.1638e-10	43291000	-0.1684	0.279264	-0.224543	A2A6J7;P19973;A2A6J4	A2A6J7;P19973;A2A6J4	Lymphocyte-specific protein 1	Lsp1
24.7913	24.7825	24.7358	25.2214	25.0684	24.6538	24.8807	24.5606	24.8187	24.9193	25.1796	25.2557				cell cycle;cell division;cellular component assembly;cellular component organization;cellular component organization or biogenesis;cellular process;macromolecular complex assembly;macromolecular complex subunit organization;protein complex assembly;protein complex subunit organization;protein heterooligomerization;protein oligomerization	binding;GTP binding;guanyl nucleotide binding;guanyl ribonucleotide binding;nucleotide binding;purine nucleotide binding;purine ribonucleoside triphosphate binding;purine ribonucleotide binding;ribonucleotide binding	actin filament bundle;actomyosin;cell cortex part;cell part;cytoplasmic part;cytoskeletal part;intracellular organelle part;intracellular part;macromolecular complex;microtubule;organelle part;perinuclear region of cytoplasm;protein complex;septin complex;stress fiber	cell cycle;cell division;cellular component assembly;cellular component organization;cellular process;macromolecular complex assembly;protein complex assembly	cell part;macromolecular complex;protein complex;septin complex		Septin	ACTIN_CYTOSKELETON;AKT_UP.V1_UP;ALCALAY_AML_BY_NPM1_LOCALIZATION_DN;AMIT_EGF_RESPONSE_480_HELA;BHAT_ESR1_TARGETS_VIA_AKT1_UP;BLALOCK_ALZHEIMERS_DISEASE_UP;BLUM_RESPONSE_TO_SALIRASIB_DN;BRUINS_UVC_RESPONSE_LATE;CAIRO_HEPATOBLASTOMA_CLASSES_UP;CELLULAR_COMPONENT_ASSEMBLY;chr17q25;CORRE_MULTIPLE_MYELOMA_UP;CYTOPLASM;CYTOPLASMIC_PART;CYTOSKELETAL_PART;CYTOSKELETON;DACOSTA_UV_RESPONSE_VIA_ERCC3_COMMON…	Alternativesplicing;Cellcycle;Celldivision;Completeproteome;Cytoplasm;Cytoskeleton;Directproteinsequencing;GTP-binding;Nucleotide-binding;Phosphoprotein;Referenceproteome		GO:0006461;GO:0007049;GO:0009987;GO:0016043;GO:0022607;GO:0043933;GO:0051259;GO:0051291;GO:0051301;GO:0065003;GO:0071822;GO:0071840	GO:0000166;GO:0005488;GO:0005525;GO:0017076;GO:0019001;GO:0032553;GO:0032555;GO:0032561;GO:0035639	GO:0001725;GO:0005874;GO:0031105;GO:0032432;GO:0032991;GO:0042641;GO:0043234;GO:0044422;GO:0044424;GO:0044430;GO:0044444;GO:0044446;GO:0044448;GO:0044464;GO:0048471	GO:0006461;GO:0007049;GO:0009987;GO:0016043;GO:0022607;GO:0051301;GO:0065003	GO:0031105;GO:0032991;GO:0043234;GO:0044464			6.132e-10	222970000	-0.218676	0.814327	-0.25246	A2A6U3;Q80UG5;A2A6U5	A2A6U3;Q80UG5;A2A6U5	Septin-9	2015-09-09
23.9833	23.7734	25.3839	24.0682	24.0708	24.0949	25.7028	22.9635	25.5836	23.4201	25.0921	25.2193				alcohol catabolic process;alcohol metabolic process;carbohydrate catabolic process;carbohydrate metabolic process;catabolic process;cellular carbohydrate catabolic process;cellular carbohydrate metabolic process;cellular metabolic process;cellular nitrogen compound metabolic process;cellular process;coenzyme metabolic process;cofactor metabolic process;glucose catabolic process;glucose metabolic …	6-phosphogluconolactonase activity;binding;carbohydrate binding;carboxylic ester hydrolase activity;catalytic activity;coenzyme binding;cofactor binding;glucose 1-dehydrogenase [NAD(P)] activity;glucose-6-phosphate dehydrogenase activity;hydrolase activity;hydrolase activity, acting on ester bonds;NADP binding;nucleotide binding;oxidoreductase activity;oxidoreductase activity, acting on CH-OH gro…	cell part;cytoplasmic part;endoplasmic reticulum lumen;endoplasmic reticulum part;intracellular membrane-bounded organelle;intracellular organelle;intracellular organelle lumen;intracellular organelle part;intracellular part;membrane-bounded organelle;membrane-enclosed lumen;mitochondrion;organelle;organelle lumen;organelle part	alcohol metabolic process;carbohydrate metabolic process;catabolic process;cellular metabolic process;cellular nitrogen compound metabolic process;cellular process;cofactor metabolic process;heterocycle metabolic process;metabolic process;nitrogen compound metabolic process;nucleobase-containing compound metabolic process;nucleobase-containing small molecule metabolic process;nucleotide metabolic…	cell part;intracellular membrane-bounded organelle;intracellular organelle;mitochondrion;organelle	Pentose phosphate pathway	G6PD_C;G6PD_N;Glucosamine_iso	ATM_DN.V1_UP;BASAKI_YBX1_TARGETS_DN;BENPORATH_MYC_MAX_TARGETS;CAGGTG_V$E12_Q6;CAIRO_LIVER_DEVELOPMENT_DN;CCCAGAG,MIR-326;chr1p36;CHYLA_CBFA2T3_TARGETS_UP;CRX_DN.V1_DN;CUI_TCF21_TARGETS_2_DN;DANG_BOUND_BY_MYC;DOANE_RESPONSE_TO_ANDROGEN_UP;FEVR_CTNNB1_TARGETS_UP;FOSTER_KDM1A_TARGETS_UP;FULCHER_INFLAMMATORY_RESPONSE_LECTIN_VS_LPS_UP;GGGYGTGNY_UNKNOWN;GROSS_HYPOXIA_VIA_ELK3_AND_HIF1A_DN;GROSS_HYPOXIA…	Carbohydratemetabolism;Completeproteome;Endoplasmicreticulum;Glucosemetabolism;Glycoprotein;Hydrolase;Multifunctionalenzyme;NAD;NADP;Oxidoreductase;Pyrrolidonecarboxylicacid;Referenceproteome;Signal		GO:0005975;GO:0005996;GO:0006006;GO:0006007;GO:0006066;GO:0006098;GO:0006139;GO:0006732;GO:0006733;GO:0006739;GO:0006740;GO:0006753;GO:0006807;GO:0008152;GO:0009056;GO:0009117;GO:0009987;GO:0016052;GO:0019318;GO:0019320;GO:0019362;GO:0034641;GO:0044237;GO:0044238;GO:0044262;GO:0044275;GO:0044281;GO:0044282;GO:0046164;GO:0046365;GO:0046483;GO:0046496;GO:0051186;GO:0055086;GO:0055114;GO:0072524	GO:0000166;GO:0003824;GO:0004345;GO:0005488;GO:0016491;GO:0016614;GO:0016616;GO:0016787;GO:0016788;GO:0017057;GO:0030246;GO:0047936;GO:0048037;GO:0050661;GO:0050662;GO:0052689	GO:0005739;GO:0005788;GO:0031974;GO:0043226;GO:0043227;GO:0043229;GO:0043231;GO:0043233;GO:0044422;GO:0044424;GO:0044432;GO:0044444;GO:0044446;GO:0044464;GO:0070013	GO:0005975;GO:0006066;GO:0006139;GO:0006807;GO:0008152;GO:0009056;GO:0009117;GO:0009987;GO:0034641;GO:0044237;GO:0044238;GO:0044281;GO:0046483;GO:0051186;GO:0055086	GO:0005739;GO:0043226;GO:0043229;GO:0043231;GO:0044464			0.0001163	241720000	-0.356545	0.362193	-0.620777	Q8CFX1;A2A7A7	Q8CFX1;A2A7A7	GDH/6PGL endoplasmic bifunctional protein;Glucose 1-dehydrogenase;6-phosphogluconolactonase	H6pd
25.7978	26.5029	26.0975	25.9867	26.5861	26.1314	26.5248	25.7042	26.5666	26.0678	26.4249	26.1638				actin cytoskeleton organization;actin filament-based process;biological regulation;cellular component organization;cellular component organization at cellular level;cellular component organization or biogenesis;cellular component organization or biogenesis at cellular level;cellular process;cortical actin cytoskeleton organization;cortical cytoskeleton organization;cytoskeleton organization;organ…	1-phosphatidylinositol binding;actin binding;binding;cytoskeletal protein binding;lipid binding;phosphatidylinositol binding;phospholipid binding;protein binding;spectrin binding;structural molecule activity	actin cytoskeleton;cell cortex part;cell part;cortical cytoskeleton;cytoplasmic part;cytoskeleton;extrinsic to membrane;Golgi apparatus;intracellular membrane-bounded organelle;intracellular non-membrane-bounded organelle;intracellular organelle;intracellular part;macromolecular complex;membrane;membrane part;membrane-bounded organelle;non-membrane-bounded organelle;nucleus;organelle;plasma membr…	biological regulation;cellular component organization;cellular process;cytoskeleton organization;organelle organization	cell part;cytoskeleton;Golgi apparatus;intracellular membrane-bounded organelle;intracellular non-membrane-bounded organelle;intracellular organelle;macromolecular complex;membrane;nucleus;organelle;plasma membrane;protein complex	Tight junction	4_1_CTD;FA;FERM_C;FERM_M;FERM_N;SAB	ACTGTGA,MIR-27A,MIR-27B;ACTIN_CYTOSKELETON;AGGCACT,MIR-515-3P;ATACTGT,MIR-144;ATGAAGG,MIR-205;BERTUCCI_MEDULLARY_VS_DUCTAL_BREAST_CANCER_UP;BOGNI_TREATMENT_RELATED_MYELOID_LEUKEMIA_UP;BROWNE_HCMV_INFECTION_6HR_DN;CACGTG_V$MYC_Q2;CAGGGTC,MIR-504;CAGGTG_V$E12_Q6;CCTNTMAGA_UNKNOWN;CELL_CORTEX;CELL_CORTEX_PART;CHANDRAN_METASTASIS_UP;CHEN_METABOLIC_SYNDROM_NETWORK;chr1p33;CONCANNON_APOPTOSIS_BY_EPOXOM…	Actin-binding;Alternativesplicing;Calmodulin-binding;Completeproteome;Cytoplasm;Cytoskeleton;Directproteinsequencing;Glycoprotein;Nucleus;Phosphoprotein;Referenceproteome		GO:0006996;GO:0007010;GO:0008360;GO:0009987;GO:0016043;GO:0022603;GO:0022604;GO:0030029;GO:0030036;GO:0030865;GO:0030866;GO:0032092;GO:0043393;GO:0044093;GO:0050789;GO:0050793;GO:0050794;GO:0051098;GO:0051099;GO:0051128;GO:0065007;GO:0065008;GO:0065009;GO:0071840;GO:0071841;GO:0071842	GO:0003779;GO:0005198;GO:0005488;GO:0005515;GO:0005543;GO:0005545;GO:0008092;GO:0008289;GO:0030507;GO:0035091	GO:0005634;GO:0005794;GO:0005856;GO:0005886;GO:0015629;GO:0016020;GO:0019898;GO:0030863;GO:0032991;GO:0043226;GO:0043227;GO:0043228;GO:0043229;GO:0043231;GO:0043232;GO:0043234;GO:0044424;GO:0044425;GO:0044444;GO:0044448;GO:0044464	GO:0006996;GO:0007010;GO:0009987;GO:0016043;GO:0065007	GO:0005634;GO:0005794;GO:0005856;GO:0005886;GO:0016020;GO:0032991;GO:0043226;GO:0043229;GO:0043231;GO:0043232;GO:0043234;GO:0044464			1.6179e-28	651660000	-0.0560557	0.109183	-0.0691891	A2A839;A2A838;P48193;A2A841;A2A842;A2AD32;F7BUB8;F6S4K9;F7CR30	A2A839;A2A838;P48193;A2A841;A2A842;A2AD32;F7BUB8;F6S4K9	Protein 4.1	Epb4.1;Epb41
25.1327	25.4498	24.8856	25.0315	25.6597	25.42	24.9848	26.7779	25.3188	27.617	26.671	23.595				2'-deoxyribonucleotide metabolic process;catabolic process;cellular catabolic process;cellular metabolic process;cellular nitrogen compound catabolic process;cellular nitrogen compound metabolic process;cellular process;deoxyribonucleotide catabolic process;deoxyribonucleotide metabolic process;heterocycle catabolic process;heterocycle metabolic process;metabolic process;nitrogen compound metabol…	5'-nucleotidase activity;binding;catalytic activity;cation binding;hydrolase activity;hydrolase activity, acting on ester bonds;ion binding;metal ion binding;nucleotidase activity;nucleotide binding;phosphatase activity;phosphoric ester hydrolase activity;pyrimidine nucleotide binding	cell part;cytoplasmic part;intracellular membrane-bounded organelle;intracellular organelle;intracellular part;membrane-bounded organelle;mitochondrion;nucleus;organelle	catabolic process;cellular metabolic process;cellular nitrogen compound metabolic process;cellular process;heterocycle metabolic process;metabolic process;nitrogen compound metabolic process;nucleobase-containing compound catabolic process;nucleobase-containing compound metabolic process;nucleobase-containing small molecule metabolic process;nucleotide metabolic process;primary metabolic process;…	cell part;intracellular membrane-bounded organelle;intracellular organelle;mitochondrion;nucleus;organelle	Nicotinate and nicotinamide metabolism;Purine metabolism;Pyrimidine metabolism	NT5C	BLALOCK_ALZHEIMERS_DISEASE_INCIPIENT_UP;BLALOCK_ALZHEIMERS_DISEASE_UP;CATABOLIC_PROCESS;CELLULAR_CATABOLIC_PROCESS;chr17q25;CYTOPLASM;DEPHOSPHORYLATION;DIAZ_CHRONIC_MEYLOGENOUS_LEUKEMIA_UP;E2F3_UP.V1_DN;GGATTA_V$PITX2_Q2;GRAESSMANN_APOPTOSIS_BY_DOXORUBICIN_DN;GSE10325_BCELL_VS_MYELOID_UP;GSE10325_CD4_TCELL_VS_BCELL_DN;GSE14769_20MIN_VS_360MIN_LPS_BMDM_UP;GSE17721_0.5H_VS_24H_GARDIQUIMOD_BMDM_UP;G…	3D-structure;Completeproteome;Cytoplasm;Hydrolase;Magnesium;Metal-binding;Nucleotide-binding;Nucleotidemetabolism;Phosphoprotein;Referenceproteome		GO:0006139;GO:0006220;GO:0006244;GO:0006753;GO:0006807;GO:0008152;GO:0009056;GO:0009117;GO:0009166;GO:0009219;GO:0009223;GO:0009262;GO:0009264;GO:0009394;GO:0009987;GO:0034641;GO:0034655;GO:0044237;GO:0044238;GO:0044248;GO:0044270;GO:0044281;GO:0046483;GO:0046700;GO:0055086;GO:0072527;GO:0072529	GO:0000166;GO:0003824;GO:0005488;GO:0008252;GO:0008253;GO:0016787;GO:0016788;GO:0016791;GO:0019103;GO:0042578;GO:0043167;GO:0043169;GO:0046872	GO:0005634;GO:0005739;GO:0043226;GO:0043227;GO:0043229;GO:0043231;GO:0044424;GO:0044444;GO:0044464	GO:0006139;GO:0006807;GO:0008152;GO:0009056;GO:0009117;GO:0009987;GO:0034641;GO:0034655;GO:0044237;GO:0044238;GO:0044281;GO:0046483;GO:0055086	GO:0005634;GO:0005739;GO:0043226;GO:0043229;GO:0043231;GO:0044464			4.3089e-31	329670000	-0.0459864	0.0324518	-0.0898285	A2A9X5;Q9JM14	A2A9X5;Q9JM14	5(3)-deoxyribonucleotidase, cytosolic type	Nt5c
26.4572	26.7242	27.6974	26.9686	27.3052	24.5794	27.7625	28.3582	27.2482	27.6139	27.8054	27.3109				aging;carbohydrate metabolic process;cellular carbohydrate metabolic process;cellular macromolecule metabolic process;cellular metabolic process;cellular process;cellular protein metabolic process;developmental process;glycosylation;macromolecule glycosylation;macromolecule metabolic process;macromolecule modification;metabolic process;peptidyl-amino acid modification;peptidyl-asparagine modifica…	binding;catalytic activity;dolichyl-diphosphooligosaccharide-protein glycotransferase activity;oligosaccharyl transferase activity;ribonucleoprotein binding;ribosome binding;transferase activity;transferase activity, transferring glycosyl groups;transferase activity, transferring hexosyl groups	autophagic vacuole membrane;cell part;cytoplasmic part;endoplasmic reticulum;endoplasmic reticulum part;integral to membrane;intracellular membrane-bounded organelle;intracellular organelle;intracellular organelle part;intracellular part;intrinsic to membrane;macromolecular complex;membrane;membrane part;membrane-bounded organelle;nucleus;oligosaccharyltransferase complex;organelle;organelle memb…	aging;carbohydrate metabolic process;cellular metabolic process;cellular process;developmental process;macromolecule metabolic process;macromolecule modification;metabolic process;peptidyl-amino acid modification;primary metabolic process;protein glycosylation;protein metabolic process;protein modification process;response to chemical stimulus;response to drug;response to stimulus	cell part;endoplasmic reticulum;intracellular membrane-bounded organelle;intracellular organelle;macromolecular complex;membrane;nucleus;organelle;protein complex	N-Glycan biosynthesis;Protein processing in endoplasmic reticulum;Various types of N-glycan biosynthesis	Ribophorin_II	ACEVEDO_LIVER_CANCER_UP;ACEVEDO_NORMAL_TISSUE_ADJACENT_TO_LIVER_TUMOR_UP;BAELDE_DIABETIC_NEPHROPATHY_DN;BARRIER_COLON_CANCER_RECURRENCE_UP;BIOCARTA_PROTEASOME_PATHWAY;BIOPOLYMER_METABOLIC_PROCESS;BIOPOLYMER_MODIFICATION;BLALOCK_ALZHEIMERS_DISEASE_DN;BLALOCK_ALZHEIMERS_DISEASE_INCIPIENT_DN;BOYAULT_LIVER_CANCER_SUBCLASS_G2;CAIRO_HEPATOBLASTOMA_CLASSES_UP;CELLULAR_MACROMOLECULE_METABOLIC_PROCESS;CEL…	Completeproteome;Endoplasmicreticulum;Glycoprotein;Glycosyltransferase;Isopeptidebond;Membrane;Referenceproteome;Signal;Transferase;Transmembrane;Transmembranehelix;Ublconjugation		GO:0005975;GO:0006464;GO:0006486;GO:0006487;GO:0007568;GO:0008152;GO:0009987;GO:0018193;GO:0018196;GO:0018279;GO:0019538;GO:0032502;GO:0042221;GO:0042493;GO:0043170;GO:0043412;GO:0043413;GO:0044237;GO:0044238;GO:0044260;GO:0044262;GO:0044267;GO:0050896;GO:0070085	GO:0003824;GO:0004576;GO:0004579;GO:0005488;GO:0016740;GO:0016757;GO:0016758;GO:0043021;GO:0043022	GO:0000421;GO:0005634;GO:0005774;GO:0005783;GO:0005791;GO:0008250;GO:0016020;GO:0016021;GO:0031090;GO:0031224;GO:0032991;GO:0043226;GO:0043227;GO:0043229;GO:0043231;GO:0043234;GO:0044422;GO:0044424;GO:0044425;GO:0044432;GO:0044437;GO:0044444;GO:0044446;GO:0044464	GO:0005975;GO:0006464;GO:0006486;GO:0007568;GO:0008152;GO:0009987;GO:0018193;GO:0019538;GO:0032502;GO:0042221;GO:0042493;GO:0043170;GO:0043412;GO:0044237;GO:0044238;GO:0050896	GO:0005634;GO:0005783;GO:0016020;GO:0032991;GO:0043226;GO:0043229;GO:0043231;GO:0043234;GO:0044464			1.3147e-89	1032800000	-0.267243	0.235833	-0.493268	A2ACG7;Q9DBG6	A2ACG7;Q9DBG6	Dolichyl-diphosphooligosaccharide--protein glycosyltransferase subunit 2	Rpn2
26.8353	26.6411	27.2001	26.7651	26.0631	26.7262	25.3618	25.7495	25.6795	26.0038	25.8192	25.9263				biosynthetic process;cellular biosynthetic process;cellular macromolecule biosynthetic process;cellular macromolecule metabolic process;cellular metabolic process;cellular process;cellular protein metabolic process;macromolecule biosynthetic process;macromolecule metabolic process;metabolic process;primary metabolic process;protein metabolic process;translation	structural constituent of ribosome;structural molecule activity	cell part;cytoplasmic part;cytosolic large ribosomal subunit;intracellular non-membrane-bounded organelle;intracellular organelle;intracellular organelle part;intracellular part;large ribosomal subunit;macromolecular complex;non-membrane-bounded organelle;organelle;organelle part;ribonucleoprotein complex;ribosome	biosynthetic process;cellular metabolic process;cellular process;macromolecule metabolic process;metabolic process;primary metabolic process;protein metabolic process;translation	cell part;intracellular non-membrane-bounded organelle;intracellular organelle;macromolecular complex;organelle;ribonucleoprotein complex;ribosome	Ribosome	Ribosomal_L32e	ABE_INNER_EAR;BENPORATH_MYC_MAX_TARGETS;BENPORATH_NANOG_TARGETS;BENPORATH_OCT4_TARGETS;BILANGES_SERUM_AND_RAPAMYCIN_SENSITIVE_GENES;CHNG_MULTIPLE_MYELOMA_HYPERPLOID_UP;chr3q13;DANG_BOUND_BY_MYC;DANG_MYC_TARGETS_UP;DIAZ_CHRONIC_MEYLOGENOUS_LEUKEMIA_DN;DUTERTRE_ESTRADIOL_RESPONSE_6HR_UP;FEVR_CTNNB1_TARGETS_DN;GAVIN_FOXP3_TARGETS_CLUSTER_T7;GCM_ACTG1;GCM_CSNK2B;GCM_NPM1;GCM_TPT1;GGCNKCCATNK_UNKNOWN;…	Completeproteome;Referenceproteome;Ribonucleoprotein;Ribosomalprotein		GO:0006412;GO:0008152;GO:0009058;GO:0009059;GO:0009987;GO:0019538;GO:0034645;GO:0043170;GO:0044237;GO:0044238;GO:0044249;GO:0044260;GO:0044267	GO:0003735;GO:0005198	GO:0005840;GO:0015934;GO:0022625;GO:0030529;GO:0032991;GO:0043226;GO:0043228;GO:0043229;GO:0043232;GO:0044422;GO:0044424;GO:0044444;GO:0044446;GO:0044464	GO:0006412;GO:0008152;GO:0009058;GO:0009987;GO:0019538;GO:0043170;GO:0044237;GO:0044238	GO:0005840;GO:0030529;GO:0032991;GO:0043226;GO:0043229;GO:0043232;GO:0044464			1.1782e-22	630110000	0.0909467	0.151836	0.117954	P62911;A2AD25;F6WJV0	P62911;A2AD25;F6WJV0	60S ribosomal protein L32	Rpl32;Gm4987;Gm10064
27.8799	27.7966	27.4409	27.4817	27.4984	27.7005	27.4134	27.6894	27.8466	27.5064	27.1311	27.7011				macromolecule metabolic process;metabolic process;primary metabolic process;protein metabolic process;proteolysis	aspartic-type endopeptidase activity;aspartic-type peptidase activity;catalytic activity;endopeptidase activity;hydrolase activity;peptidase activity;peptidase activity, acting on L-amino acid peptides		macromolecule metabolic process;metabolic process;primary metabolic process;protein metabolic process;proteolysis			Asp_protease;ubiquitin	CHARAFE_BREAST_CANCER_LUMINAL_VS_MESENCHYMAL_UP;chr1p36;CTACCTC,LET-7A,LET-7B,LET-7C,LET-7D,LET-7E,LET-7F,MIR-98,LET-7G,LET-7I;DOUGLAS_BMI1_TARGETS_DN;GRAESSMANN_APOPTOSIS_BY_DOXORUBICIN_DN;GSE13306_RA_VS_UNTREATED_TREG_UP;GSE14308_TH1_VS_TH17_DN;GSE14308_TH2_VS_TH17_DN;GSE14769_20MIN_VS_360MIN_LPS_BMDM_UP;GSE2197_CPG_DNA_VS_UNTREATED_IN_DC_DN;GSE26669_CTRL_VS_COSTIM_BLOCK_MLR_CD8_TCELL_DN;GSE270…	Completeproteome;Phosphoprotein;Referenceproteome		GO:0006508;GO:0008152;GO:0019538;GO:0043170;GO:0044238	GO:0003824;GO:0004175;GO:0004190;GO:0008233;GO:0016787;GO:0070001;GO:0070011		GO:0006508;GO:0008152;GO:0019538;GO:0043170;GO:0044238				4.3093e-07	1424400000	0.0248666	0.0604474	0.0291066	A2ADY9	A2ADY9	Protein DDI1 homolog 2	Ddi2
24.8516	25.2906	27.8065	25.1107	24.535	25.265	24.1975	25.3389	25.228	25.5768	26.0021	25.0583				biological regulation;cell differentiation;cellular developmental process;cellular process;developmental process;multicellular organismal development;multicellular organismal process;negative regulation of biological process;negative regulation of cell cycle;negative regulation of cell cycle process;negative regulation of cell growth;negative regulation of cellular process;negative regulation of …	binding;cation binding;ion binding;metal ion binding;transition metal ion binding;zinc ion binding	cell part;cytoplasm;intracellular membrane-bounded organelle;intracellular organelle;intracellular part;membrane;membrane-bounded organelle;nucleus;organelle;plasma membrane	biological regulation;cell differentiation;cellular process;developmental process;multicellular organismal development;multicellular organismal process;regulation of cell cycle;regulation of mitotic cell cycle;regulation of transport	cell part;cytoplasm;intracellular membrane-bounded organelle;intracellular organelle;membrane;nucleus;organelle;plasma membrane		LIM	ACEVEDO_FGFR1_TARGETS_IN_PROSTATE_CANCER_MODEL_DN;AGGAGTG,MIR-483;ALONSO_METASTASIS_UP;BERENJENO_TRANSFORMED_BY_RHOA_REVERSIBLY_DN;BERENJENO_TRANSFORMED_BY_RHOA_UP;BERTUCCI_MEDULLARY_VS_DUCTAL_BREAST_CANCER_DN;BLALOCK_ALZHEIMERS_DISEASE_DN;BLALOCK_ALZHEIMERS_DISEASE_INCIPIENT_DN;CAGTATT,MIR-200B,MIR-200C,MIR-429;CASTELLANO_HRAS_AND_NRAS_TARGETS_DN;CHARAFE_BREAST_CANCER_LUMINAL_VS_BASAL_DN;CHARAFE…	Alternativesplicing;Completeproteome;Cytoplasm;Developmentalprotein;Differentiation;LIMdomain;Metal-binding;Nucleus;Referenceproteome;Repeat;Zinc;Zinc-finger		GO:0001558;GO:0003254;GO:0007275;GO:0007346;GO:0009987;GO:0010389;GO:0010564;GO:0010948;GO:0010959;GO:0010972;GO:0030154;GO:0030308;GO:0032501;GO:0032502;GO:0032844;GO:0032879;GO:0040008;GO:0043266;GO:0043268;GO:0043269;GO:0043270;GO:0045786;GO:0045926;GO:0045930;GO:0048518;GO:0048519;GO:0048523;GO:0048869;GO:0050789;GO:0050794;GO:0051049;GO:0051050;GO:0051128;GO:0051726;GO:0065007;GO:2000021;GO:…	GO:0005488;GO:0008270;GO:0043167;GO:0043169;GO:0046872;GO:0046914	GO:0005634;GO:0005737;GO:0005886;GO:0016020;GO:0043226;GO:0043227;GO:0043229;GO:0043231;GO:0044424;GO:0044464	GO:0007275;GO:0007346;GO:0009987;GO:0030154;GO:0032501;GO:0032502;GO:0051049;GO:0051726;GO:0065007	GO:0005634;GO:0005737;GO:0005886;GO:0016020;GO:0043226;GO:0043229;GO:0043231;GO:0044464			4.9465e-29	328690000	-0.468785	0.922119	-0.632172	P97447;A2AEX8;A2AEX6;A2AEY1;A2AEY2;A2AEX7;A2AEX9;A2AEY0	P97447;A2AEX8;A2AEX6;A2AEY1;A2AEY2;A2AEX7	Four and a half LIM domains protein 1	Fhl1
25.6247	25.7104	23.9389	26.105	25.7381	25.5357	25.7863	25.434	25.5601	25.5007	25.0277	25.6567				biological regulation;catabolic process;cellular catabolic process;cellular macromolecule catabolic process;cellular macromolecule metabolic process;cellular metabolic process;cellular nitrogen compound metabolic process;cellular process;establishment of localization;establishment of RNA localization;macromolecule catabolic process;macromolecule metabolic process;metabolic process;mRNA catabolic …	adenyl nucleotide binding;adenyl ribonucleotide binding;ATP binding;ATPase activity;ATPase activity, coupled;ATP-dependent helicase activity;ATP-dependent RNA helicase activity;binding;catalytic activity;helicase activity;hydrolase activity;hydrolase activity, acting on acid anhydrides;hydrolase activity, acting on acid anhydrides, in phosphorus-containing anhydrides;mRNA binding;nucleic acid bin…	catalytic step 2 spliceosome;cell part;cytoplasm;exon-exon junction complex;intracellular organelle part;intracellular part;macromolecular complex;nuclear body;nuclear part;nuclear speck;nucleoplasm part;organelle part;protein complex;ribonucleoprotein complex;spliceosomal complex	biological regulation;catabolic process;cellular metabolic process;cellular nitrogen compound metabolic process;cellular process;establishment of localization;macromolecule metabolic process;metabolic process;mRNA metabolic process;mRNA processing;nitrogen compound metabolic process;nucleobase-containing compound metabolic process;nucleobase-containing compound transport;primary metabolic process…	cell part;cytoplasm;macromolecular complex;protein complex;ribonucleoprotein complex;spliceosomal complex	mRNA surveillance pathway;RNA transport;Spliceosome	DEAD;Helicase_C	ACEVEDO_LIVER_CANCER_UP;ACEVEDO_LIVER_TUMOR_VS_NORMAL_ADJACENT_TISSUE_UP;ACOSTA_PROLIFERATION_INDEPENDENT_MYC_TARGETS_UP;ADENYL_NUCLEOTIDE_BINDING;ADENYL_RIBONUCLEOTIDE_BINDING;ATP_BINDING;ATP_DEPENDENT_HELICASE_ACTIVITY;ATP_DEPENDENT_RNA_HELICASE_ACTIVITY;ATPASE_ACTIVITY;ATPASE_ACTIVITY_COUPLED;BIDUS_METASTASIS_UP;BIOSYNTHETIC_PROCESS;BOYAULT_LIVER_CANCER_SUBCLASS_G3_UP;BROWNE_HCMV_INFECTION_14H…	Acetylation;ATP-binding;Completeproteome;Cytoplasm;Helicase;Hydrolase;mRNAprocessing;mRNAsplicing;mRNAtransport;Nonsense-mediatedmRNAdecay;Nucleotide-binding;Nucleus;Phosphoprotein;Referenceproteome;RNA-binding;rRNAprocessing;Spliceosome;Translationregulation;Transport		GO:0000184;GO:0000956;GO:0006139;GO:0006364;GO:0006396;GO:0006397;GO:0006401;GO:0006402;GO:0006417;GO:0006807;GO:0006810;GO:0008152;GO:0008380;GO:0009056;GO:0009057;GO:0009889;GO:0009890;GO:0009891;GO:0009892;GO:0009893;GO:0009987;GO:0010468;GO:0010556;GO:0010557;GO:0010558;GO:0010604;GO:0010605;GO:0010608;GO:0015931;GO:0016070;GO:0016071;GO:0016072;GO:0017148;GO:0019222;GO:0031323;GO:0031324;GO:…	GO:0000166;GO:0003676;GO:0003723;GO:0003724;GO:0003727;GO:0003729;GO:0003824;GO:0004004;GO:0004386;GO:0005488;GO:0005524;GO:0008026;GO:0008143;GO:0008186;GO:0016462;GO:0016787;GO:0016817;GO:0016818;GO:0016887;GO:0017076;GO:0017111;GO:0030554;GO:0032553;GO:0032555;GO:0032559;GO:0035639;GO:0042623;GO:0070035;GO:0070717	GO:0005681;GO:0005737;GO:0016604;GO:0016607;GO:0030529;GO:0032991;GO:0035145;GO:0043234;GO:0044422;GO:0044424;GO:0044428;GO:0044446;GO:0044451;GO:0044464;GO:0071013	GO:0006139;GO:0006364;GO:0006396;GO:0006397;GO:0006401;GO:0006417;GO:0006807;GO:0006810;GO:0008152;GO:0008380;GO:0009056;GO:0009987;GO:0015931;GO:0016070;GO:0016071;GO:0034641;GO:0043170;GO:0044237;GO:0044238;GO:0051234;GO:0065007	GO:0005681;GO:0005737;GO:0030529;GO:0032991;GO:0043234;GO:0044464			2.4831e-17	521280000	0.161006	0.531635	0.187224	A2AFK7;Q91VC3	A2AFK7;Q91VC3	Eukaryotic initiation factor 4A-III	Eif4a3
24.4596	25.1879	24.0086	25.4865	25.4071	24.599	22.9341	24.9954	23.3583	22.9397	23.7535	23.1275				catabolic process;cellular catabolic process;cellular macromolecule metabolic process;cellular metabolic process;cellular nitrogen compound catabolic process;cellular nitrogen compound metabolic process;cellular process;GTP catabolic process;GTP metabolic process;heterocycle catabolic process;heterocycle metabolic process;macromolecule metabolic process;metabolic process;mRNA metabolic process;mR…	binding;catalytic activity;GTP binding;GTPase activity;guanyl nucleotide binding;guanyl ribonucleotide binding;hydrolase activity;hydrolase activity, acting on acid anhydrides;hydrolase activity, acting on acid anhydrides, in phosphorus-containing anhydrides;nucleic acid binding;nucleoside-triphosphatase activity;nucleotide binding;purine nucleotide binding;purine ribonucleoside triphosphate bind…	Cajal body;catalytic step 2 spliceosome;cell part;cytoplasm;intracellular membrane-bounded organelle;intracellular organelle;intracellular organelle part;intracellular part;macromolecular complex;membrane-bounded organelle;nuclear body;nuclear part;nuclear speck;nucleoplasm part;nucleus;organelle;organelle part;ribonucleoprotein complex;spliceosomal complex	catabolic process;cellular metabolic process;cellular nitrogen compound metabolic process;cellular process;heterocycle metabolic process;macromolecule metabolic process;metabolic process;mRNA metabolic process;mRNA processing;nitrogen compound metabolic process;nucleobase-containing compound catabolic process;nucleobase-containing compound metabolic process;nucleobase-containing small molecule me…	cell part;cytoplasm;intracellular membrane-bounded organelle;intracellular organelle;macromolecular complex;nucleus;organelle;ribonucleoprotein complex;spliceosomal complex	Spliceosome	EFG_C;EFG_IV;GTP_EFTU;GTP_EFTU_D2	ABRAMSON_INTERACT_WITH_AIRE;BENPORATH_MYC_MAX_TARGETS;BIOPOLYMER_METABOLIC_PROCESS;CACGTG_V$MYC_Q2;CAMPS_COLON_CANCER_COPY_NUMBER_UP;chr17q21;DANG_REGULATED_BY_MYC_UP;GRADE_COLON_AND_RECTAL_CANCER_UP;GSE13306_RA_VS_UNTREATED_TCONV_DN;GSE13306_TREG_RA_VS_TCONV_RA_UP;GSE14000_UNSTIM_VS_4H_LPS_DC_UP;GSE14350_IL2RB_KO_VS_WT_TREG_UP;GSE15930_NAIVE_VS_48H_IN_VITRO_STIM_IFNAB_CD8_TCELL_DN;GSE15930_NAIVE…	Acetylation;Completeproteome;Elongationfactor;GTP-binding;mRNAprocessing;mRNAsplicing;Nucleotide-binding;Nucleus;Phosphoprotein;Proteinbiosynthesis;Referenceproteome;Spliceosome		GO:0006139;GO:0006163;GO:0006184;GO:0006195;GO:0006396;GO:0006397;GO:0006753;GO:0006807;GO:0008152;GO:0008380;GO:0009056;GO:0009117;GO:0009141;GO:0009143;GO:0009144;GO:0009146;GO:0009150;GO:0009154;GO:0009166;GO:0009199;GO:0009203;GO:0009205;GO:0009207;GO:0009259;GO:0009261;GO:0009987;GO:0016070;GO:0016071;GO:0034641;GO:0034655;GO:0043170;GO:0044237;GO:0044238;GO:0044248;GO:0044260;GO:0044270;GO:…	GO:0000166;GO:0003676;GO:0003723;GO:0003746;GO:0003824;GO:0003924;GO:0005488;GO:0005525;GO:0008135;GO:0016462;GO:0016787;GO:0016817;GO:0016818;GO:0017076;GO:0017111;GO:0019001;GO:0032553;GO:0032555;GO:0032561;GO:0035639	GO:0005634;GO:0005681;GO:0005737;GO:0015030;GO:0016604;GO:0016607;GO:0030529;GO:0032991;GO:0043226;GO:0043227;GO:0043229;GO:0043231;GO:0044422;GO:0044424;GO:0044428;GO:0044446;GO:0044451;GO:0044464;GO:0071013	GO:0006139;GO:0006396;GO:0006397;GO:0006807;GO:0008152;GO:0008380;GO:0009056;GO:0009117;GO:0009987;GO:0016070;GO:0016071;GO:0034641;GO:0034655;GO:0043170;GO:0044237;GO:0044238;GO:0044281;GO:0046483;GO:0055086	GO:0005634;GO:0005681;GO:0005737;GO:0030529;GO:0032991;GO:0043226;GO:0043229;GO:0043231;GO:0044464	+		9.0044e-08	189390000	0.757466	1.08626	1.18915	G3UZ34;O08810;A2AH85	G3UZ34;O08810;A2AH85	116 kDa U5 small nuclear ribonucleoprotein component	Eftud2
25.8866	25.909	25.8669	26.6088	26.2735	26.8924	26.0041	26.7062	26.0245	26.8221	26.4578	27.0793				macromolecule metabolic process;metabolic process;primary metabolic process;protein metabolic process;proteolysis	binding;catalytic activity;cation binding;endopeptidase activity;hydrolase activity;ion binding;metal ion binding;metalloendopeptidase activity;metallopeptidase activity;peptidase activity;peptidase activity, acting on L-amino acid peptides	cell part;cytoplasmic part;intracellular membrane-bounded organelle;intracellular organelle;intracellular organelle lumen;intracellular organelle part;intracellular part;membrane-bounded organelle;membrane-enclosed lumen;mitochondrial matrix;mitochondrial part;mitochondrion;organelle;organelle lumen;organelle part	macromolecule metabolic process;metabolic process;primary metabolic process;protein metabolic process;proteolysis	cell part;intracellular membrane-bounded organelle;intracellular organelle;mitochondrion;organelle		Peptidase_M16;Peptidase_M16_C	ACEVEDO_LIVER_CANCER_DN;ACEVEDO_LIVER_TUMOR_VS_NORMAL_ADJACENT_TISSUE_DN;CELLULAR_MACROMOLECULE_METABOLIC_PROCESS;CELLULAR_PROTEIN_METABOLIC_PROCESS;chr9q34;CREIGHTON_AKT1_SIGNALING_VIA_MTOR_UP;CYCLIN_D1_KE_.V1_UP;CYTOPLASM;CYTOPLASMIC_PART;DEBIASI_APOPTOSIS_BY_REOVIRUS_INFECTION_DN;ENDOPEPTIDASE_ACTIVITY;ENVELOPE;GARY_CD5_TARGETS_DN;GRAESSMANN_APOPTOSIS_BY_DOXORUBICIN_UP;GSE11057_NAIVE_CD4_VS_PB…	Acetylation;Completeproteome;Directproteinsequencing;Hydrolase;Metalloprotease;Mitochondrion;Protease;Referenceproteome;Transitpeptide		GO:0006508;GO:0008152;GO:0019538;GO:0043170;GO:0044238	GO:0003824;GO:0004175;GO:0004222;GO:0005488;GO:0008233;GO:0008237;GO:0016787;GO:0043167;GO:0043169;GO:0046872;GO:0070011	GO:0005739;GO:0005759;GO:0031974;GO:0043226;GO:0043227;GO:0043229;GO:0043231;GO:0043233;GO:0044422;GO:0044424;GO:0044429;GO:0044444;GO:0044446;GO:0044464;GO:0070013	GO:0006508;GO:0008152;GO:0019538;GO:0043170;GO:0044238	GO:0005739;GO:0043226;GO:0043229;GO:0043231;GO:0044464			5.0689e-15	646640000	-0.0971931	0.15966	-0.12689	A2AIW9;Q9DC61	A2AIW9;Q9DC61	Mitochondrial-processing peptidase subunit alpha	Pmpca
28.1537	27.9865	28.5091	28.1348	29.1862	28.8477	28.6923	28.9676	28.7181	28.9271	28.4904	28.3276				anatomical structure homeostasis;biological regulation;carbohydrate metabolic process;cellular homeostasis;cellular process;homeostatic process;metabolic process;neuron homeostasis;primary metabolic process;regulation of biological quality	catalytic activity;kinase activity;phosphotransferase activity, alcohol group as acceptor;transferase activity;transferase activity, transferring phosphorus-containing groups		biological regulation;carbohydrate metabolic process;cellular homeostasis;cellular process;homeostatic process;metabolic process;primary metabolic process			FGGY_C;FGGY_N	ACEVEDO_LIVER_TUMOR_VS_NORMAL_ADJACENT_TISSUE_UP;ACEVEDO_NORMAL_TISSUE_ADJACENT_TO_LIVER_TUMOR_DN;BREDEMEYER_RAG_SIGNALING_VIA_ATM_NOT_VIA_NFKB_UP;BYSTRYKH_HEMATOPOIESIS_STEM_CELL_QTL_TRANS;CHEBOTAEV_GR_TARGETS_DN;chr1p32;CSR_LATE_UP.V1_DN;CTTTGA_V$LEF1_Q2;DAVICIONI_RHABDOMYOSARCOMA_PAX_FOXO1_FUSION_UP;DAVICIONI_TARGETS_OF_PAX_FOXO1_FUSIONS_UP;DODD_NASOPHARYNGEAL_CARCINOMA_UP;DOUGLAS_BMI1_TARGETS…	Alternativesplicing;Completeproteome;Kinase;Referenceproteome;Transferase		GO:0005975;GO:0008152;GO:0009987;GO:0019725;GO:0042592;GO:0044238;GO:0060249;GO:0065007;GO:0065008;GO:0070050	GO:0003824;GO:0016301;GO:0016740;GO:0016772;GO:0016773		GO:0005975;GO:0008152;GO:0009987;GO:0019725;GO:0042592;GO:0044238;GO:0065007				5.1011e-29	2622400000	0.263512	0.936411	0.307627	A2AJL3;A2AJL4;D6RG41;F7ANG8;B1AY71;F6V664;B7ZCH9;H3BJ80;D6RHR3	A2AJL3;A2AJL4	FGGY carbohydrate kinase domain-containing protein	Fggy
26.6862	27.6596	27.922	26.2178	28.4601	26.9247	28.2338	27.798	27.9599	27.7096	27.2097	26.9249				aerobic respiration;anatomical structure morphogenesis;behavior;biological regulation;carbohydrate homeostasis;cell communication;cell part morphogenesis;cellular component morphogenesis;cellular component organization;cellular component organization at cellular level;cellular component organization or biogenesis;cellular component organization or biogenesis at cellular level;cellular development…	binding;catalytic activity;insulin-activated receptor activity;kinase activity;molecular transducer activity;odorant binding;pheromone binding;phosphotransferase activity, alcohol group as acceptor;protein kinase activity;protein tyrosine kinase activity;receptor activity;signal transducer activity;signaling receptor activity;transferase activity;transferase activity, transferring phosphorus-cont…	cell part;cytoplasmic part;cytosol;extracellular region;extracellular region part;extracellular space;intracellular membrane-bounded organelle;intracellular organelle;intracellular part;membrane-bounded organelle;nucleus;organelle	anatomical structure morphogenesis;behavior;biological regulation;cell communication;cellular component morphogenesis;cellular component organization;cellular metabolic process;cellular process;cellular respiration;developmental process;energy reserve metabolic process;generation of precursor metabolites and energy;homeostatic process;metabolic process;mitochondrion organization;multicellular org…	cell part;cytosol;extracellular region;extracellular space;intracellular membrane-bounded organelle;intracellular organelle;nucleus;organelle		Lipocalin		3D-structure;Acetylation;Allergen;Completeproteome;Disulfidebond;Pheromone-binding;Referenceproteome;Secreted;Signal;Transport		GO:0001659;GO:0002791;GO:0002792;GO:0006091;GO:0006109;GO:0006111;GO:0006112;GO:0006355;GO:0006950;GO:0006996;GO:0007005;GO:0007154;GO:0007610;GO:0007622;GO:0007623;GO:0007626;GO:0008152;GO:0009060;GO:0009267;GO:0009605;GO:0009653;GO:0009719;GO:0009725;GO:0009889;GO:0009890;GO:0009892;GO:0009893;GO:0009966;GO:0009967;GO:0009987;GO:0009991;GO:0010033;GO:0010468;GO:0010556;GO:0010558;GO:0010565;GO:…	GO:0003824;GO:0004672;GO:0004713;GO:0004714;GO:0004871;GO:0004872;GO:0004888;GO:0005009;GO:0005215;GO:0005488;GO:0005549;GO:0005550;GO:0016301;GO:0016740;GO:0016772;GO:0016773;GO:0019199;GO:0038023;GO:0060089	GO:0005576;GO:0005615;GO:0005634;GO:0005829;GO:0043226;GO:0043227;GO:0043229;GO:0043231;GO:0044421;GO:0044424;GO:0044444;GO:0044464	GO:0006091;GO:0006112;GO:0006950;GO:0006996;GO:0007005;GO:0007154;GO:0007610;GO:0008152;GO:0009605;GO:0009653;GO:0009719;GO:0009987;GO:0009991;GO:0016043;GO:0032501;GO:0032502;GO:0032989;GO:0042221;GO:0042592;GO:0042594;GO:0044237;GO:0045333;GO:0048511;GO:0050896;GO:0051049;GO:0065007	GO:0005576;GO:0005615;GO:0005634;GO:0005829;GO:0043226;GO:0043229;GO:0043231;GO:0044464			3.3664e-39	1336600000	0.285434	0.436629	0.403096	P04938;Q58EV3;P11588;P02762;B5X0G2;A9R9W0;A2CEL1;A2AKN9;A2BIM8;B8JI96;L7MUC7;A2CEK6;P11589;A2CEK7;A2BIN1;A2AKN8;A9C497;E9QA79;A9C496;A2CEL0;A2BIN0;L7N222;E9PVW0;A2CEK9;P11591;B5TE77	P04938;Q58EV3;P11588;P02762;B5X0G2;A9R9W0;A2CEL1;A2AKN9;A2BIM8;B8JI96;L7MUC7;A2CEK6;P11589;A2CEK7;A2BIN1;A2AKN8;A9C497;E9QA79;A9C496;A2CEL0;A2BIN0;L7N222;E9PVW0	Major urinary proteins 11 and 8;Major urinary protein 1;Major urinary protein 6;Major urinary protein 17;Major urinary protein 2	Mup8;Mup7;Mup1;Mup6;Mup17;Mup15;Mup2;Mup9;Mup14;Mup13;Mup10;Mup11
26.9979	27.8613	27.472	27.1056	27.4673	27.9667	28.8149	28.1617	26.859	26.8963	26.9969	27.9751				biosynthetic process;cellular biosynthetic process;cellular lipid metabolic process;cellular metabolic process;cellular process;ether lipid biosynthetic process;ether lipid metabolic process;glycerol ether biosynthetic process;glycerol ether metabolic process;glycerolipid biosynthetic process;glycerolipid metabolic process;lipid biosynthetic process;lipid metabolic process;metabolic process;organ…	alkylglycerone-phosphate synthase activity;binding;catalytic activity;coenzyme binding;cofactor binding;FAD binding;flavin adenine dinucleotide binding;oxidoreductase activity;oxidoreductase activity, acting on CH-OH group of donors;oxidoreductase activity, acting on the CH-OH group of donors, NAD or NADP as acceptor;transferase activity;transferase activity, transferring alkyl or aryl (other tha…	cell part;cytoplasmic part;intracellular membrane-bounded organelle;intracellular organelle;intracellular organelle part;intracellular part;membrane;membrane-bounded organelle;microbody;microbody membrane;microbody part;mitochondrion;organelle;organelle membrane;organelle part;peroxisomal membrane;peroxisomal part	biosynthetic process;cellular lipid metabolic process;cellular metabolic process;cellular process;glycerol ether metabolic process;lipid metabolic process;metabolic process;primary metabolic process;small molecule metabolic process	cell part;intracellular membrane-bounded organelle;intracellular organelle;membrane;microbody;mitochondrion;organelle	Ether lipid metabolism;Peroxisome	FAD_binding_4;FAD-oxidase_C	BECKER_TAMOXIFEN_RESISTANCE_DN;BENPORATH_MYC_MAX_TARGETS;BIOSYNTHETIC_PROCESS;CAGGTA_V$AREB6_01;CAIRO_HEPATOBLASTOMA_CLASSES_UP;CELLULAR_LIPID_METABOLIC_PROCESS;CHARAFE_BREAST_CANCER_LUMINAL_VS_BASAL_DN;CHARAFE_BREAST_CANCER_LUMINAL_VS_MESENCHYMAL_DN;CHIARETTI_ACUTE_LYMPHOBLASTIC_LEUKEMIA_ZAP70;chr2q;CYTOPLASM;CYTOPLASMIC_PART;DANG_BOUND_BY_MYC;DIAZ_CHRONIC_MEYLOGENOUS_LEUKEMIA_UP;DURCHDEWALD_SKI…	Acetylation;Completeproteome;FAD;Flavoprotein;Lipidbiosynthesis;Lipidmetabolism;Peroxisome;Phosphoprotein;Referenceproteome;Transferase;Transitpeptide		GO:0006629;GO:0006662;GO:0008152;GO:0008610;GO:0008611;GO:0009058;GO:0009987;GO:0018904;GO:0044237;GO:0044238;GO:0044249;GO:0044255;GO:0044281;GO:0045017;GO:0046485;GO:0046486;GO:0046504	GO:0003824;GO:0005488;GO:0008609;GO:0008762;GO:0016491;GO:0016614;GO:0016616;GO:0016740;GO:0016765;GO:0048037;GO:0050660;GO:0050662;GO:0071949	GO:0005739;GO:0005778;GO:0016020;GO:0031090;GO:0031903;GO:0042579;GO:0043226;GO:0043227;GO:0043229;GO:0043231;GO:0044422;GO:0044424;GO:0044438;GO:0044439;GO:0044444;GO:0044446;GO:0044464	GO:0006629;GO:0006662;GO:0008152;GO:0009058;GO:0009987;GO:0044237;GO:0044238;GO:0044255;GO:0044281	GO:0005739;GO:0016020;GO:0042579;GO:0043226;GO:0043229;GO:0043231;GO:0044464			4.9569e-60	1558200000	0.664682	1.26706	0.920835	Q8C0I1;A2AL50;H3BKN2;A2AL49;H3BIY5	Q8C0I1;A2AL50;H3BKN2;A2AL49	Alkyldihydroxyacetonephosphate synthase, peroxisomal	Agps
26.7353	27.0605	25.9522	26.5255	26.294	26.0376	26.089	27.109	25.991	25.5462	26.0436	26.015				cellular metabolic process;cellular process;electron transport chain;generation of precursor metabolites and energy;metabolic process;oxidation-reduction process		cell part;cytoplasmic part;integral to membrane;intracellular membrane-bounded organelle;intracellular organelle;intracellular organelle part;intracellular part;intrinsic to membrane;macromolecular complex;membrane part;membrane-bounded organelle;mitochondrial membrane part;mitochondrial part;mitochondrial respiratory chain complex I;mitochondrion;NADH dehydrogenase complex;nucleus;organelle;orga…	cellular metabolic process;cellular process;generation of precursor metabolites and energy;metabolic process	cell part;intracellular membrane-bounded organelle;intracellular organelle;macromolecular complex;mitochondrion;NADH dehydrogenase complex;nucleus;organelle;protein complex	Alzheimer's disease;Huntington's disease;Oxidative phosphorylation;Parkinson's disease	NDUF_B6	ACEVEDO_LIVER_TUMOR_VS_NORMAL_ADJACENT_TISSUE_UP;AMIT_EGF_RESPONSE_40_MCF10A;BENPORATH_MYC_MAX_TARGETS;BURTON_ADIPOGENESIS_6;chr9p13;CONCANNON_APOPTOSIS_BY_EPOXOMICIN_DN;CYTOPLASM;CYTOPLASMIC_PART;DAIRKEE_CANCER_PRONE_RESPONSE_E2;DANG_BOUND_BY_MYC;DIAZ_CHRONIC_MEYLOGENOUS_LEUKEMIA_UP;ENVELOPE;GRAESSMANN_APOPTOSIS_BY_DOXORUBICIN_UP;GSE13485_DAY1_VS_DAY21_YF17D_VACCINE_PBMC_DN;GSE14000_4H_VS_16H_LP…	Acetylation;Completeproteome;Electrontransport;Membrane;Mitochondrion;Mitochondrioninnermembrane;Referenceproteome;Respiratorychain;Transmembrane;Transmembranehelix;Transport	Respiratory chain complex I, mitochondrial	GO:0006091;GO:0008152;GO:0009987;GO:0022900;GO:0044237;GO:0055114		GO:0005634;GO:0005739;GO:0005747;GO:0016021;GO:0030964;GO:0031224;GO:0032991;GO:0043226;GO:0043227;GO:0043229;GO:0043231;GO:0043234;GO:0044422;GO:0044424;GO:0044425;GO:0044429;GO:0044444;GO:0044446;GO:0044455;GO:0044464;GO:0045271	GO:0006091;GO:0008152;GO:0009987;GO:0044237	GO:0005634;GO:0005739;GO:0030964;GO:0032991;GO:0043226;GO:0043229;GO:0043231;GO:0043234;GO:0044464			5.3467e-12	614120000	0.379152	0.888261	0.483448	A2AP32;Q3UIU2	A2AP32;Q3UIU2	NADH dehydrogenase [ubiquinone] 1 beta subcomplex subunit 6	Ndufb6
26.2109	25.3518	25.8068	27.0747	26.5049	26.0206	26.7423	26.689	25.9372	25.9793	26.2401	27.2031				anatomical structure development;biological regulation;cation transport;chemical homeostasis;developmental process;establishment of localization;excretion;homeostatic process;ion transport;kidney development;metal ion transport;monovalent inorganic cation transport;multicellular organismal process;organ development;potassium ion transport;regulation of biological quality;secretion;sodium ion tran…	active transmembrane transporter activity;anion transmembrane transporter activity;anion:cation symporter activity;cation transmembrane transporter activity;cation:chloride symporter activity;chloride transmembrane transporter activity;inorganic anion transmembrane transporter activity;ion transmembrane transporter activity;secondary active transmembrane transporter activity;solute:cation symport…	apical plasma membrane;cell part;integral to membrane;intrinsic to membrane;membrane part;plasma membrane part	anatomical structure development;biological regulation;developmental process;establishment of localization;excretion;homeostatic process;ion transport;multicellular organismal process;secretion;transport	cell part		AA_permease;AA_permease_N	ACTIVE_TRANSMEMBRANE_TRANSPORTER_ACTIVITY;ALFANO_MYC_TARGETS;ANION_CATION_SYMPORTER_ACTIVITY;ANION_TRANSMEMBRANE_TRANSPORTER_ACTIVITY;BROWNE_HCMV_INFECTION_12HR_DN;BROWNE_HCMV_INFECTION_30MIN_DN;BROWNE_HCMV_INFECTION_48HR_DN;BROWNE_HCMV_INFECTION_4HR_DN;CATION_TRANSMEMBRANE_TRANSPORTER_ACTIVITY;CELL_FRACTION;chr15q15;CUI_TCF21_TARGETS_2_DN;GCNP_SHH_UP_LATE.V1_UP;GGATTA_V$PITX2_Q2;GOTZMANN_EPITHEL…	Alternativesplicing;Completeproteome;Glycoprotein;Iontransport;Membrane;Phosphoprotein;Potassium;Potassiumtransport;Referenceproteome;Sodium;Sodiumtransport;Symport;Transmembrane;Transmembranehelix;Transport		GO:0001822;GO:0003008;GO:0006810;GO:0006811;GO:0006812;GO:0006813;GO:0006814;GO:0007588;GO:0015672;GO:0030001;GO:0032501;GO:0032502;GO:0042592;GO:0046903;GO:0048513;GO:0048856;GO:0048878;GO:0051234;GO:0065007;GO:0065008	GO:0005215;GO:0008324;GO:0008509;GO:0015075;GO:0015103;GO:0015108;GO:0015291;GO:0015293;GO:0015294;GO:0015296;GO:0015377;GO:0022804;GO:0022857;GO:0022891;GO:0022892	GO:0016021;GO:0016324;GO:0031224;GO:0044425;GO:0044459;GO:0044464	GO:0006810;GO:0006811;GO:0007588;GO:0032501;GO:0032502;GO:0042592;GO:0046903;GO:0048856;GO:0051234;GO:0065007	GO:0044464			2.3539e-20	604470000	0.111556	0.171172	0.149264	A2AQ52;A2AQ51;A2AQ50;P55014	A2AQ52;A2AQ51;A2AQ50;P55014	Solute carrier family 12 member 1	Slc12a1
24.4789	23.8444	25.3288	24.1366	25.0461	23.6742	24.9578	24.605	24.6623	24.9659	24.7524	25.5946				biological regulation;cell differentiation;cell proliferation;cellular developmental process;cellular macromolecule metabolic process;cellular metabolic process;cellular process;cellular protein metabolic process;cullin deneddylation;developmental process;macromolecule metabolic process;macromolecule modification;metabolic process;muscle cell differentiation;negative regulation of biological proc…	protein binding transcription factor activity;transcription cofactor activity;transcription corepressor activity;transcription factor binding transcription factor activity	cell part;cytoplasm;intracellular organelle part;intracellular part;macromolecular complex;nuclear part;organelle part;protein complex;signalosome	biological regulation;cell differentiation;cell proliferation;cellular metabolic process;cellular process;developmental process;macromolecule metabolic process;macromolecule modification;metabolic process;primary metabolic process;protein metabolic process;protein modification by small protein conjugation or removal;protein modification process	cell part;cytoplasm;macromolecular complex;protein complex		PCI	ATAACCT,MIR-154;BENPORATH_MYC_MAX_TARGETS;BIOPOLYMER_METABOLIC_PROCESS;BUYTAERT_PHOTODYNAMIC_THERAPY_STRESS_UP;CAGCTTT,MIR-320;chr15q21;CREIGHTON_ENDOCRINE_THERAPY_RESISTANCE_1;CYTOPLASM;DANG_BOUND_BY_MYC;DEBIASI_APOPTOSIS_BY_REOVIRUS_INFECTION_UP;DIAZ_CHRONIC_MEYLOGENOUS_LEUKEMIA_UP;DODD_NASOPHARYNGEAL_CARCINOMA_DN;ENK_UV_RESPONSE_KERATINOCYTE_DN;FLECHNER_BIOPSY_KIDNEY_TRANSPLANT_OK_VS_DONOR_UP;…	Alternativesplicing;Completeproteome;Cytoplasm;Nucleus;Phosphoprotein;Referenceproteome;Signalosome	COP9 signalosome complex (CSN);COP9 signalosome complex (Gps1, Cops1, Cops2, Cops3, Cops4, Cops5, Cops6, Cops7a, Cops7b, Cops8)	GO:0000122;GO:0000338;GO:0006355;GO:0006357;GO:0006464;GO:0008152;GO:0008283;GO:0009889;GO:0009890;GO:0009892;GO:0009987;GO:0010388;GO:0010468;GO:0010556;GO:0010558;GO:0010605;GO:0010629;GO:0019219;GO:0019222;GO:0019538;GO:0030154;GO:0030182;GO:0031323;GO:0031324;GO:0031326;GO:0031327;GO:0032502;GO:0035914;GO:0042692;GO:0043170;GO:0043412;GO:0044237;GO:0044238;GO:0044260;GO:0044267;GO:0045892;GO:…	GO:0000988;GO:0000989;GO:0003712;GO:0003714	GO:0005737;GO:0008180;GO:0032991;GO:0043234;GO:0044422;GO:0044424;GO:0044428;GO:0044446;GO:0044464	GO:0006464;GO:0008152;GO:0008283;GO:0009987;GO:0019538;GO:0030154;GO:0032502;GO:0043170;GO:0043412;GO:0044237;GO:0044238;GO:0065007;GO:0070647	GO:0005737;GO:0032991;GO:0043234;GO:0044464			1.8879e-07	207910000	-0.307053	0.515114	-0.422984	A2AQE4;P61202	A2AQE4;P61202	COP9 signalosome complex subunit 2	Cops2
27.1129	27.177	27.0873	27.306	27.2466	27.8648	27.6061	26.9289	27.3726	27.7158	27.3333	27.4102				acetate biosynthetic process;acetate metabolic process;acetyl-CoA biosynthetic process;acetyl-CoA metabolic process;biosynthetic process;carboxylic acid biosynthetic process;carboxylic acid metabolic process;cellular biosynthetic process;cellular ketone metabolic process;cellular metabolic process;cellular process;coenzyme biosynthetic process;coenzyme metabolic process;cofactor biosynthetic proc…	acetate-CoA ligase activity;acid-thiol ligase activity;adenyl nucleotide binding;adenyl ribonucleotide binding;ATP binding;binding;catalytic activity;CoA-ligase activity;ligase activity;ligase activity, forming carbon-sulfur bonds;nucleotide binding;purine nucleotide binding;purine ribonucleoside triphosphate binding;purine ribonucleotide binding;ribonucleotide binding	cell part;cytoplasm;intracellular membrane-bounded organelle;intracellular organelle;intracellular part;membrane-bounded organelle;nucleus;organelle	biosynthetic process;cellular ketone metabolic process;cellular metabolic process;cellular process;cofactor metabolic process;metabolic process;organic acid metabolic process;small molecule metabolic process	cell part;cytoplasm;intracellular membrane-bounded organelle;intracellular organelle;nucleus;organelle	Carbon fixation pathways in prokaryotes;Glycolysis / Gluconeogenesis;Methane metabolism;Propanoate metabolism;Pyruvate metabolism	AMP-binding;DUF3448;DUF4009	AACTTT_UNKNOWN;BENPORATH_MYC_MAX_TARGETS;BILD_MYC_ONCOGENIC_SIGNATURE;BRUINS_UVC_RESPONSE_LATE;CHANG_CORE_SERUM_RESPONSE_DN;CHEMNITZ_RESPONSE_TO_PROSTAGLANDIN_E2_DN;chr20q11;DANG_BOUND_BY_MYC;DEMAGALHAES_AGING_DN;FORTSCHEGGER_PHF8_TARGETS_DN;GSE11057_NAIVE_VS_EFF_MEMORY_CD4_TCELL_UP;GSE16522_MEMORY_VS_NAIVE_ANTI_CD3CD28_STIM_CD8_TCELL_UP;GSE17580_UNINFECTED_VS_S_MANSONI_INF_TEFF_UP;GSE17721_0.5H_…	Acetylation;ATP-binding;Completeproteome;Cytoplasm;Ligase;Nucleotide-binding;Phosphoprotein;Referenceproteome		GO:0006082;GO:0006083;GO:0006084;GO:0006085;GO:0006732;GO:0008152;GO:0009058;GO:0009108;GO:0009987;GO:0016053;GO:0019413;GO:0019541;GO:0019542;GO:0019752;GO:0032787;GO:0042180;GO:0043436;GO:0044237;GO:0044249;GO:0044281;GO:0044283;GO:0046394;GO:0051186;GO:0051188	GO:0000166;GO:0003824;GO:0003987;GO:0005488;GO:0005524;GO:0016405;GO:0016874;GO:0016877;GO:0016878;GO:0017076;GO:0030554;GO:0032553;GO:0032555;GO:0032559;GO:0035639	GO:0005634;GO:0005737;GO:0043226;GO:0043227;GO:0043229;GO:0043231;GO:0044424;GO:0044464	GO:0006082;GO:0008152;GO:0009058;GO:0009987;GO:0042180;GO:0044237;GO:0044281;GO:0051186	GO:0005634;GO:0005737;GO:0043226;GO:0043229;GO:0043231;GO:0044464			6.0414e-67	1252900000	-0.0379381	0.0747489	-0.0463862	Q9QXG4;A2AQN5;A2AQN4;F7CU63;D6RHA7	Q9QXG4;A2AQN5;A2AQN4	Acetyl-coenzyme A synthetase, cytoplasmic	Acss2
31.2309	31.1397	31.1104	30.9869	30.9616	30.9163	30.7998	31.0624	30.4754	30.3399	30.5008	30.638				anatomical structure development;cell proliferation;cellular component organization;cellular component organization or biogenesis;cellular membrane organization;cellular process;developmental process;endocytosis;establishment of localization;forebrain development;membrane invagination;membrane organization;metabolic process;receptor-mediated endocytosis;small molecule metabolic process;transport;…	binding;calcium ion binding;cation binding;ion binding;metal ion binding;receptor activity	apical plasma membrane;brush border membrane;cell part;cell projection membrane;cell projection part;coated pit;cytoplasmic membrane-bounded vesicle;cytoplasmic part;cytoplasmic vesicle;endocytic vesicle;endoplasmic reticulum;endosome;Golgi apparatus;integral to membrane;intracellular membrane-bounded organelle;intracellular organelle;intracellular part;intrinsic to membrane;membrane part;membran…	anatomical structure development;cell proliferation;cellular component organization;cellular membrane organization;cellular process;developmental process;endocytosis;establishment of localization;membrane invagination;membrane organization;metabolic process;small molecule metabolic process;transport;vesicle-mediated transport;vitamin metabolic process	cell part;cytoplasmic membrane-bounded vesicle;endoplasmic reticulum;endosome;Golgi apparatus;intracellular membrane-bounded organelle;intracellular organelle;organelle;vesicle	Hedgehog signaling pathway	cEGF;EGF_CA;Ldl_recept_a;Ldl_recept_b	AACATTC,MIR-409-3P;ACTTTAT,MIR-142-5P;AFFAR_YY1_TARGETS_UP;BECKER_TAMOXIFEN_RESISTANCE_DN;BENPORATH_EED_TARGETS;BENPORATH_ES_WITH_H3K27ME3;BENPORATH_NANOG_TARGETS;BENPORATH_PRC2_TARGETS;BENPORATH_SOX2_TARGETS;BENPORATH_SUZ12_TARGETS;BIOPOLYMER_METABOLIC_PROCESS;BIOPOLYMER_MODIFICATION;BIOSYNTHETIC_PROCESS;BRUINS_UVC_RESPONSE_VIA_TP53_GROUP_A;CAHOY_ASTROGLIAL;CELLULAR_MACROMOLECULE_METABOLIC_PROCE…	Calcium;Coatedpit;Completeproteome;Disulfidebond;EGF-likedomain;Endocytosis;Glycoprotein;Membrane;Metal-binding;Phosphoprotein;Receptor;Referenceproteome;Repeat;SH3-binding;Signal;Transmembrane;Transmembranehelix		GO:0006766;GO:0006810;GO:0006897;GO:0006898;GO:0008152;GO:0008283;GO:0009987;GO:0010324;GO:0016043;GO:0016044;GO:0016192;GO:0030900;GO:0032502;GO:0044281;GO:0048856;GO:0051234;GO:0061024;GO:0071840	GO:0004872;GO:0005488;GO:0005509;GO:0043167;GO:0043169;GO:0046872	GO:0005768;GO:0005783;GO:0005794;GO:0005905;GO:0016021;GO:0016023;GO:0016324;GO:0030139;GO:0031224;GO:0031253;GO:0031410;GO:0031526;GO:0031982;GO:0031988;GO:0043226;GO:0043227;GO:0043229;GO:0043231;GO:0044424;GO:0044425;GO:0044444;GO:0044459;GO:0044463;GO:0044464	GO:0006766;GO:0006810;GO:0006897;GO:0008152;GO:0008283;GO:0009987;GO:0010324;GO:0016043;GO:0016044;GO:0016192;GO:0032502;GO:0044281;GO:0048856;GO:0051234;GO:0061024	GO:0005768;GO:0005783;GO:0005794;GO:0016023;GO:0031982;GO:0043226;GO:0043229;GO:0043231;GO:0044464		+	0	14886000000	0.412761	2.80254	0.44653	A2ARV4;A2ARV5;Q3V346	A2ARV4	Low-density lipoprotein receptor-related protein 2	Lrp2
24.9423	24.3234	24.4788	24.5975	27.3332	25.5651	27.4793	27.3336	27.2867	26.4199	27.167	27.4237				acetyl-CoA catabolic process;acetyl-CoA metabolic process;alcohol catabolic process;alcohol metabolic process;carbohydrate catabolic process;carbohydrate metabolic process;catabolic process;cellular carbohydrate catabolic process;cellular carbohydrate metabolic process;cellular catabolic process;cellular metabolic process;cellular process;coenzyme catabolic process;coenzyme metabolic process;cofa…	binding;catalytic activity;coenzyme binding;cofactor binding;oxidoreductase activity;oxidoreductase activity, acting on the aldehyde or oxo group of donors;oxidoreductase activity, acting on the aldehyde or oxo group of donors, disulfide as acceptor;oxoglutarate dehydrogenase (succinyl-transferring) activity;thiamine pyrophosphate binding;vitamin binding	cell part;cytoplasmic part;intracellular membrane-bounded organelle;intracellular organelle;intracellular part;membrane-bounded organelle;mitochondrion;organelle	alcohol metabolic process;carbohydrate metabolic process;catabolic process;cellular metabolic process;cellular process;cofactor metabolic process;generation of precursor metabolites and energy;metabolic process;primary metabolic process;small molecule metabolic process	cell part;intracellular membrane-bounded organelle;intracellular organelle;mitochondrion;organelle		E1_dh;Transket_pyr	AMBROSINI_FLAVOPIRIDOL_TREATMENT_TP53;BOYAULT_LIVER_CANCER_SUBCLASS_G3_DN;CAIRO_HEPATOBLASTOMA_DN;CASORELLI_ACUTE_PROMYELOCYTIC_LEUKEMIA_DN;CHIANG_LIVER_CANCER_SUBCLASS_PROLIFERATION_DN;chr10p14;CHYLA_CBFA2T3_TARGETS_DN;CREIGHTON_ENDOCRINE_THERAPY_RESISTANCE_1;CREIGHTON_ENDOCRINE_THERAPY_RESISTANCE_4;DODD_NASOPHARYNGEAL_CARCINOMA_DN;DURAND_STROMA_MAX_UP;DUTERTRE_ESTRADIOL_RESPONSE_24HR_UP;GARY_CD…	Completeproteome;Glycolysis;Mitochondrion;Oxidoreductase;Referenceproteome;Thiaminepyrophosphate;Transitpeptide		GO:0005975;GO:0005996;GO:0006006;GO:0006007;GO:0006066;GO:0006084;GO:0006091;GO:0006096;GO:0006099;GO:0006732;GO:0008152;GO:0009056;GO:0009109;GO:0009987;GO:0016052;GO:0019318;GO:0019320;GO:0044237;GO:0044238;GO:0044248;GO:0044262;GO:0044275;GO:0044281;GO:0044282;GO:0046164;GO:0046356;GO:0046365;GO:0051186;GO:0051187	GO:0003824;GO:0004591;GO:0005488;GO:0016491;GO:0016624;GO:0016903;GO:0019842;GO:0030976;GO:0048037;GO:0050662	GO:0005739;GO:0043226;GO:0043227;GO:0043229;GO:0043231;GO:0044424;GO:0044444;GO:0044464	GO:0005975;GO:0006066;GO:0006091;GO:0008152;GO:0009056;GO:0009987;GO:0044237;GO:0044238;GO:0044281;GO:0051186	GO:0005739;GO:0043226;GO:0043229;GO:0043231;GO:0044464			3.6026e-41	517980000	-0.0971883	0.106456	-0.146538	A2ATU0	A2ATU0	Probable 2-oxoglutarate dehydrogenase E1 component DHKTD1, mitochondrial	Dhtkd1
26.1368	26.8003	26.1003	26.0634	26.3246	25.565	25.8923	26.0804	26.0653	26.0335	25.8355	26.5842						cell part;cytoplasmic part;intracellular part;perinuclear region of cytoplasm		cell part		TPD52	AGUIRRE_PANCREATIC_CANCER_COPY_NUMBER_UP;BLALOCK_ALZHEIMERS_DISEASE_UP;BOYAULT_LIVER_CANCER_SUBCLASS_G3_UP;BROWNE_HCMV_INFECTION_20HR_DN;CAGCTTT,MIR-320;CAIRO_HEPATOBLASTOMA_CLASSES_UP;chr20q13;ENK_UV_RESPONSE_EPIDERMIS_UP;GGGCGGR_V$SP1_Q6;GRAESSMANN_APOPTOSIS_BY_DOXORUBICIN_DN;GSE10239_KLRG1INT_VS_KLRG1HIGH_EFF_CD8_TCELL_UP;GSE10325_LUPUS_BCELL_VS_LUPUS_MYELOID_DN;GSE10325_LUPUS_CD4_TCELL_VS_LUP…	Acetylation;Coiledcoil;Completeproteome;Phosphoprotein;Referenceproteome				GO:0044424;GO:0044444;GO:0044464;GO:0048471		GO:0044464			2.3686e-17	554760000	-0.133775	0.304735	-0.164045	Q3TUJ9;Q8BKP1;Q3TAI4;Q9CYZ2;A2AUD5;F6VQ81;V9GWU5	Q3TUJ9;Q8BKP1;Q3TAI4;Q9CYZ2;A2AUD5;F6VQ81	Tumor protein D54	Tpd52l2
24.4294	24.3784	24.3371	24.3557	24.666	24.2874	24.302	24.1394	24.2602	24.5866	24.106	24.6405				actin cytoskeleton organization;actin filament-based process;cellular component organization;cellular component organization at cellular level;cellular component organization or biogenesis;cellular component organization or biogenesis at cellular level;cellular process;cortical actin cytoskeleton organization;cortical cytoskeleton organization;cytoskeleton organization;organelle organization	structural molecule activity	cell part;cytoplasm;cytoskeleton;extrinsic to membrane;intracellular non-membrane-bounded organelle;intracellular organelle;intracellular part;membrane part;non-membrane-bounded organelle;organelle	cellular component organization;cellular process;cytoskeleton organization;organelle organization	cell part;cytoplasm;cytoskeleton;intracellular non-membrane-bounded organelle;intracellular organelle;organelle	Tight junction	4_1_CTD;FA;FERM_C;FERM_M;FERM_N;SAB	AAGCACA,MIR-218;ACACTGG,MIR-199A,MIR-199B;ACTGTGA,MIR-27A,MIR-27B;AGGTGCA,MIR-500;ASTIER_INTEGRIN_SIGNALING;ATTACAT,MIR-380-3P;CAGGTA_V$AREB6_01;chr20q11;CTTGTAT,MIR-381;CTTTGCA,MIR-527;DODD_NASOPHARYNGEAL_CARCINOMA_UP;FORTSCHEGGER_PHF8_TARGETS_DN;GCAAGAC,MIR-431;GCACCTT,MIR-18A,MIR-18B;GGGAGGRR_V$MAZ_Q6;GNF2_DNM1;GNF2_RAB3A;GOBERT_OLIGODENDROCYTE_DIFFERENTIATION_DN;GOZGIT_ESR1_TARGETS_DN;GSE1330…	Actin-binding;Alternativesplicing;Completeproteome;Cytoplasm;Cytoskeleton;Phosphoprotein;Referenceproteome		GO:0006996;GO:0007010;GO:0009987;GO:0016043;GO:0030029;GO:0030036;GO:0030865;GO:0030866;GO:0071840;GO:0071841;GO:0071842	GO:0005198	GO:0005737;GO:0005856;GO:0019898;GO:0043226;GO:0043228;GO:0043229;GO:0043232;GO:0044424;GO:0044425;GO:0044464	GO:0006996;GO:0007010;GO:0009987;GO:0016043	GO:0005737;GO:0005856;GO:0043226;GO:0043229;GO:0043232;GO:0044464			7.0055e-32	159980000	-0.0424079	0.107458	-0.0496407	A2AUK7;A2AUK8;Q9Z2H5;A2AUK5;A2AUK6;E9PV14	A2AUK7;A2AUK8;Q9Z2H5;A2AUK5;A2AUK6;E9PV14	Band 4.1-like protein 1	Epb4.1l1;Epb41l1
26.4382	25.3122	25.947	26.6064	26.3719	26.3541	26.3948	25.4358	26.4864	26.5165	25.4584	25.6586				biological regulation;cellular process;cellular response to stimulus;establishment of localization;establishment of protein localization;protein transport;regulation of biological process;regulation of cellular process;response to stimulus;signal transduction;transport		cell part;cytoplasmic part;endoplasmic reticulum part;integral to endoplasmic reticulum membrane;integral to membrane;integral to organelle membrane;intracellular organelle part;intracellular part;intrinsic to endoplasmic reticulum membrane;intrinsic to membrane;intrinsic to organelle membrane;membrane part;organelle part	biological regulation;cellular process;establishment of localization;protein transport;response to stimulus;signal transduction;transport	cell part	Protein processing in endoplasmic reticulum	Rib_recp_KP_reg	ACATTCC,MIR-1,MIR-206;ALCALAY_AML_BY_NPM1_LOCALIZATION_UP;AMIT_EGF_RESPONSE_480_HELA;BILBAN_B_CLL_LPL_UP;BIOSYNTHETIC_PROCESS;BLALOCK_ALZHEIMERS_DISEASE_UP;BOYAULT_LIVER_CANCER_SUBCLASS_G6_DN;CELLULAR_BIOSYNTHETIC_PROCESS;CELLULAR_MACROMOLECULE_METABOLIC_PROCESS;CELLULAR_PROTEIN_METABOLIC_PROCESS;chr20p12;CREIGHTON_ENDOCRINE_THERAPY_RESISTANCE_3;CTTTGA_V$LEF1_Q2;CYTOPLASM;CYTOPLASMIC_PART;DAVICIO…	Alternativesplicing;Completeproteome;Endoplasmicreticulum;Membrane;Phosphoprotein;Proteintransport;Referenceproteome;Repeat;Translocation;Transmembrane;Transmembranehelix;Transport		GO:0006810;GO:0007165;GO:0009987;GO:0015031;GO:0045184;GO:0050789;GO:0050794;GO:0050896;GO:0051234;GO:0051716;GO:0065007		GO:0016021;GO:0030176;GO:0031224;GO:0031227;GO:0031300;GO:0031301;GO:0044422;GO:0044424;GO:0044425;GO:0044432;GO:0044444;GO:0044446;GO:0044464	GO:0006810;GO:0007165;GO:0009987;GO:0015031;GO:0050896;GO:0051234;GO:0065007	GO:0044464			1.1738e-21	585510000	0.0801546	0.111803	0.109149	A2AVJ7;Q99PL5	A2AVJ7;Q99PL5	Ribosome-binding protein 1	Rrbp1
27.4445	27.2079	27.3897	28.183	27.2574	27.2775	27.6793	27.2135	26.9632	27.3512	27.4601	27.2002				biological regulation;cellular component assembly;cellular component assembly at cellular level;cellular component organization;cellular component organization at cellular level;cellular component organization or biogenesis;cellular component organization or biogenesis at cellular level;cellular macromolecular complex assembly;cellular macromolecular complex subunit organization;cellular process;…	binding;DNA binding;nucleic acid binding	cell part;cytoplasmic part;cytosol;endoplasmic reticulum;intracellular membrane-bounded organelle;intracellular organelle;intracellular organelle part;intracellular part;macromolecular complex;membrane-bounded organelle;nuclear part;nucleoplasm;nucleus;organelle;organelle part;perinuclear region of cytoplasm;protein complex	biological regulation;cellular component assembly;cellular component organization;cellular macromolecular complex assembly;cellular process;chromatin organization;chromosome organization;macromolecular complex assembly;organelle organization	cell part;cytosol;endoplasmic reticulum;intracellular membrane-bounded organelle;intracellular organelle;macromolecular complex;nucleoplasm;nucleus;organelle;protein complex		NAP	ACEVEDO_LIVER_TUMOR_VS_NORMAL_ADJACENT_TISSUE_UP;ALONSO_METASTASIS_UP;APPIERTO_RESPONSE_TO_FENRETINIDE_DN;ATCTTGC,MIR-31;BAELDE_DIABETIC_NEPHROPATHY_DN;BENPORATH_NANOG_TARGETS;BENPORATH_NOS_TARGETS;BENPORATH_OCT4_TARGETS;BENPORATH_SOX2_TARGETS;BHATTACHARYA_EMBRYONIC_STEM_CELL;BIOCARTA_SET_PATHWAY;BIOPOLYMER_METABOLIC_PROCESS;BIOPOLYMER_MODIFICATION;BLALOCK_ALZHEIMERS_DISEASE_UP;BYSTROEM_CORRELATE…	Acetylation;Alternativesplicing;Chaperone;Completeproteome;Cytoplasm;DNA-binding;Endoplasmicreticulum;Isopeptidebond;Methylation;Nucleus;Phosphoprotein;Referenceproteome;Ublconjugation		GO:0006325;GO:0006334;GO:0006355;GO:0006996;GO:0009889;GO:0009890;GO:0009892;GO:0009987;GO:0010468;GO:0010556;GO:0010558;GO:0010605;GO:0010629;GO:0010941;GO:0016043;GO:0019219;GO:0019222;GO:0022607;GO:0031323;GO:0031324;GO:0031326;GO:0031327;GO:0034621;GO:0034622;GO:0034728;GO:0042981;GO:0043066;GO:0043067;GO:0043069;GO:0043523;GO:0043524;GO:0043933;GO:0045892;GO:0045934;GO:0048519;GO:0048523;GO:…	GO:0003676;GO:0003677;GO:0005488	GO:0005634;GO:0005654;GO:0005783;GO:0005829;GO:0032991;GO:0043226;GO:0043227;GO:0043229;GO:0043231;GO:0043234;GO:0044422;GO:0044424;GO:0044428;GO:0044444;GO:0044446;GO:0044464;GO:0048471	GO:0006325;GO:0006996;GO:0009987;GO:0016043;GO:0022607;GO:0034622;GO:0051276;GO:0065003;GO:0065007	GO:0005634;GO:0005654;GO:0005783;GO:0005829;GO:0032991;GO:0043226;GO:0043229;GO:0043231;GO:0043234;GO:0044464			1.7692e-45	1240700000	0.0982615	0.313258	0.113261	A2BE93;Q9EQU5;A2BE92	A2BE93;Q9EQU5;A2BE92	Protein SET	Set
25.8833	25.748	25.8799	25.9087	25.8044	25.7617	26.0641	25.9057	26.1873	25.9523	26.0644	26.8405				cellular component movement;cellular process;establishment of localization;microtubule-based movement;microtubule-based process;transport	catalytic activity;hydrolase activity;hydrolase activity, acting on acid anhydrides;hydrolase activity, acting on acid anhydrides, in phosphorus-containing anhydrides;motor activity;nucleoside-triphosphatase activity;pyrophosphatase activity	cell part;centrosome;cytoplasmic dynein complex;cytoplasmic part;cytoskeletal part;dynein complex;intracellular non-membrane-bounded organelle;intracellular organelle;intracellular organelle part;intracellular part;macromolecular complex;microtubule;microtubule associated complex;microtubule organizing center;non-membrane-bounded organelle;organelle;organelle part;protein complex;vesicle	cellular component movement;cellular process;establishment of localization;transport	cell part;centrosome;intracellular non-membrane-bounded organelle;intracellular organelle;macromolecular complex;microtubule organizing center;organelle;protein complex;vesicle	Phagosome;Vasopressin-regulated water reabsorption	Dynein_IC2;WD40	AAANWWTGC_UNKNOWN;ACTAYRNNNCCCR_UNKNOWN;BLALOCK_ALZHEIMERS_DISEASE_DN;BROWNE_HCMV_INFECTION_14HR_DN;BROWNE_HCMV_INFECTION_1HR_DN;BROWNE_HCMV_INFECTION_48HR_DN;CHANDRAN_METASTASIS_DN;chr2q31;CTTTGT_V$LEF1_Q2;FLECHNER_BIOPSY_KIDNEY_TRANSPLANT_OK_VS_DONOR_UP;GCM_BAG5;GCM_BMPR2;GCM_CALM1;GCM_CRKL;GCM_DFFA;GCM_DLG1;GCM_ERBB2IP;GCM_GSPT1;GCM_MAP4K4;GCM_MLL;GCM_MYST2;GCM_NF2;GCM_PTK2;GCM_RAB10;GCM_RAN;G…	Completeproteome;Cytoplasm;Cytoskeleton;Dynein;Microtubule;Motorprotein;Phosphoprotein;Referenceproteome;Repeat;Transport;WDrepeat		GO:0006810;GO:0006928;GO:0007017;GO:0007018;GO:0009987;GO:0051234	GO:0003774;GO:0003824;GO:0016462;GO:0016787;GO:0016817;GO:0016818;GO:0017111	GO:0005813;GO:0005815;GO:0005868;GO:0005874;GO:0005875;GO:0030286;GO:0031982;GO:0032991;GO:0043226;GO:0043228;GO:0043229;GO:0043232;GO:0043234;GO:0044422;GO:0044424;GO:0044430;GO:0044444;GO:0044446;GO:0044464	GO:0006810;GO:0006928;GO:0009987;GO:0051234	GO:0005813;GO:0005815;GO:0031982;GO:0032991;GO:0043226;GO:0043229;GO:0043232;GO:0043234;GO:0044464			2.7931e-28	471470000	-0.311686	0.91117	-0.377153	A2BFF8;O88487;Q3TPJ8;A2BFF5;A2BFF9	A2BFF8;O88487;Q3TPJ8;A2BFF5;A2BFF9	Cytoplasmic dynein 1 intermediate chain 2	Dync1i2
25.1235	25.0835	25.3784	25.4886	25.5399	24.0415	25.5593	25.5912	25.5764	25.6614	25.5735	25.5678				biological regulation;cellular component organization;cellular component organization or biogenesis;regulation of actin cytoskeleton organization;regulation of actin filament length;regulation of actin filament polymerization;regulation of actin filament-based process;regulation of actin polymerization or depolymerization;regulation of anatomical structure size;regulation of biological process;re…		cell part;cytoplasm;cytoskeleton;intracellular non-membrane-bounded organelle;intracellular organelle;intracellular part;non-membrane-bounded organelle;organelle	biological regulation;cellular component organization;regulation of organelle organization	cell part;cytoplasm;cytoskeleton;intracellular non-membrane-bounded organelle;intracellular organelle;organelle	Bacterial invasion of epithelial cells;Fc gamma R-mediated phagocytosis;Pathogenic Escherichia coli infection;Regulation of actin cytoskeleton;Shigellosis	P16-Arc	BASAKI_YBX1_TARGETS_UP;BLALOCK_ALZHEIMERS_DISEASE_DN;BRUINS_UVC_RESPONSE_LATE;CCTGCTG,MIR-214;chr9q34;CREIGHTON_ENDOCRINE_THERAPY_RESISTANCE_3;FULCHER_INFLAMMATORY_RESPONSE_LECTIN_VS_LPS_UP;GCTCTTG,MIR-335;GGGAGGRR_V$MAZ_Q6;GGGCGGR_V$SP1_Q6;GINESTIER_BREAST_CANCER_ZNF217_AMPLIFIED_DN;GSE10325_LUPUS_BCELL_VS_LUPUS_MYELOID_UP;GSE14000_TRANSLATED_RNA_VS_MRNA_16H_LPS_DC_DN;GSE1448_CTRL_VS_ANTI_VALPHA…	Actin-binding;Completeproteome;Cytoplasm;Cytoskeleton;Directproteinsequencing;Phosphoprotein;Referenceproteome		GO:0008064;GO:0016043;GO:0030832;GO:0030833;GO:0032271;GO:0032535;GO:0032956;GO:0032970;GO:0033043;GO:0043254;GO:0044087;GO:0050789;GO:0050794;GO:0051128;GO:0051493;GO:0065007;GO:0065008;GO:0071840;GO:0090066		GO:0005737;GO:0005856;GO:0043226;GO:0043228;GO:0043229;GO:0043232;GO:0044424;GO:0044464	GO:0016043;GO:0033043;GO:0065007	GO:0005737;GO:0005856;GO:0043226;GO:0043229;GO:0043232;GO:0044464			2.9734e-10	330670000	-0.298113	0.492635	-0.411777	Q9D898;A3KGQ6	Q9D898;A3KGQ6	Actin-related protein 2/3 complex subunit 5-like protein	Arpc5l
26.3648	26.1051	26.3782	26.5588	26.389	26.2875	25.6919	25.5972	26.2044	26.2184	26.5282	26.157											AGGGCCA,MIR-328;ALK_DN.V1_DN;BENPORATH_CYCLING_GENES;BOYAULT_LIVER_CANCER_SUBCLASS_G3_DN;CHANG_IMMORTALIZED_BY_HPV31_UP;chr22q13;DODD_NASOPHARYNGEAL_CARCINOMA_UP;GNF2_IL2RB;GNF2_PTPN4;GSE10239_KLRG1INT_VS_KLRG1HIGH_EFF_CD8_TCELL_DN;GSE12845_IGD_POS_VS_NEG_BLOOD_BCELL_DN;GSE13229_IMM_VS_MATURE_NKCELL_DN;GSE1432_CTRL_VS_IFNG_1H_MICROGLIA_UP;GSE17974_IL4_AND_ANTI_IL12_VS_UNTREATED_48H_ACT_CD4_TCELL_…	Alternativesplicing;Completeproteome;Referenceproteome;Repeat;TPRrepeat									1.253e-25	639170000	-0.234235	0.618819	-0.2856	A3KMP2;D6RH59	A3KMP2	Tetratricopeptide repeat protein 38	Ttc38
28.6723	28.6858	28.3505	27.793	28.3419	27.1069	28.4046	29.0381	27.8224	27.4733	28.0678	28.3399				biological regulation;cation homeostasis;chemical homeostasis;homeostatic process;ion homeostasis;monovalent inorganic cation homeostasis;regulation of biological quality;regulation of pH	active transmembrane transporter activity;anion transmembrane transporter activity;anion:anion antiporter activity;anion:cation symporter activity;antiporter activity;bicarbonate transmembrane transporter activity;cation transmembrane transporter activity;inorganic anion exchanger activity;inorganic anion transmembrane transporter activity;inorganic cation transmembrane transporter activity;ion t…	basolateral plasma membrane;cell part;integral to membrane;integral to plasma membrane;intrinsic to membrane;intrinsic to plasma membrane;membrane part;plasma membrane part	biological regulation;homeostatic process	cell part	Bile secretion;Pancreatic secretion;Proximal tubule bicarbonate reclamation	Band_3_cyto;HCO3_cotransp	AACTGGA,MIR-145;AATGTGA,MIR-23A,MIR-23B;ACEVEDO_FGFR1_TARGETS_IN_PROSTATE_CANCER_MODEL_DN;ACTIVE_TRANSMEMBRANE_TRANSPORTER_ACTIVITY;ACTTTAT,MIR-142-5P;AFFAR_YY1_TARGETS_DN;ANION_CATION_SYMPORTER_ACTIVITY;ANION_TRANSMEMBRANE_TRANSPORTER_ACTIVITY;BERENJENO_TRANSFORMED_BY_RHOA_UP;BLALOCK_ALZHEIMERS_DISEASE_UP;BMI1_DN_MEL18_DN.V1_DN;BOYAULT_LIVER_CANCER_SUBCLASS_G123_DN;BRUINS_UVC_RESPONSE_VIA_TP53_G…	Alternativesplicing;Cellmembrane;Completeproteome;Directproteinsequencing;Glycoprotein;Iontransport;Membrane;Phosphoprotein;Referenceproteome;Sodium;Sodiumtransport;Symport;Transmembrane;Transmembranehelix;Transport		GO:0006885;GO:0042592;GO:0048878;GO:0050801;GO:0055067;GO:0055080;GO:0065007;GO:0065008	GO:0005215;GO:0005452;GO:0008324;GO:0008509;GO:0008510;GO:0015075;GO:0015077;GO:0015081;GO:0015103;GO:0015106;GO:0015291;GO:0015293;GO:0015294;GO:0015296;GO:0015297;GO:0015300;GO:0015301;GO:0022804;GO:0022857;GO:0022890;GO:0022891;GO:0022892;GO:0046873	GO:0005887;GO:0016021;GO:0016323;GO:0031224;GO:0031226;GO:0044425;GO:0044459;GO:0044464	GO:0042592;GO:0065007	GO:0044464			4.832e-111	2392500000	0.205687	0.277086	0.296988	A7E1Z5;O88343;E9Q8N8	A7E1Z5;O88343;E9Q8N8	Electrogenic sodium bicarbonate cotransporter 1	Slc4a4
32.723	33.156	32.9701	31.9259	31.9292	32.1736	31.991	31.2034	32.3275	31.8594	32.6159	30.9367				biological regulation;negative regulation of biological process;negative regulation of biosynthetic process;negative regulation of cellular biosynthetic process;negative regulation of cellular macromolecule biosynthetic process;negative regulation of cellular metabolic process;negative regulation of cellular process;negative regulation of gene expression;negative regulation of macromolecule biosy…	binding;cation binding;heme binding;ion binding;iron ion binding;metal ion binding;oxygen binding;oxygen transporter activity;substrate-specific transporter activity;tetrapyrrole binding;transition metal ion binding;transporter activity	cell part;cytoplasmic part;cytosolic part;hemoglobin complex;intracellular part;macromolecular complex;protein complex	biological regulation	cell part;macromolecular complex;protein complex	African trypanosomiasis;Malaria	Globin		3D-structure;Completeproteome;Directproteinsequencing;Heme;Iron;Metal-binding;Oxygentransport;Phosphoprotein;Polymorphism;Referenceproteome;Transport		GO:0000122;GO:0006355;GO:0006357;GO:0009889;GO:0009890;GO:0009892;GO:0010468;GO:0010556;GO:0010558;GO:0010605;GO:0010629;GO:0019219;GO:0019222;GO:0031323;GO:0031324;GO:0031326;GO:0031327;GO:0045892;GO:0045934;GO:0048519;GO:0048523;GO:0050789;GO:0050794;GO:0051171;GO:0051172;GO:0051252;GO:0051253;GO:0060255;GO:0065007;GO:0080090;GO:2000112;GO:2000113	GO:0005215;GO:0005344;GO:0005488;GO:0005506;GO:0019825;GO:0020037;GO:0022892;GO:0043167;GO:0043169;GO:0046872;GO:0046906;GO:0046914	GO:0005833;GO:0032991;GO:0043234;GO:0044424;GO:0044444;GO:0044445;GO:0044464	GO:0065007	GO:0032991;GO:0043234;GO:0044464			1.4117e-178	42242000000	-0.0775861	0.0950619	-0.11055	A8DUK4;P02088;P02089;CON__Q3SX09;CON__P02070;P02104	A8DUK4;P02088	Hemoglobin subunit beta-1	Hbb-b1
26.9174	26.3749	26.8701	26.7892	27.084	27.4031	27.2995	26.8469	26.6063	27.2312	26.8899	26.6036				acetate metabolic process;axon ensheathment;axon ensheathment in central nervous system;biological regulation;carboxylic acid metabolic process;cellular ketone metabolic process;cellular metabolic process;cellular process;central nervous system myelination;ensheathment of neurons;metabolic process;monocarboxylic acid metabolic process;myelination;organic acid metabolic process;oxoacid metabolic p…	aminoacylase activity;aspartoacylase activity;binding;catalytic activity;cation binding;hydrolase activity;hydrolase activity, acting on carbon-nitrogen (but not peptide) bonds;hydrolase activity, acting on carbon-nitrogen (but not peptide) bonds, in linear amides;hydrolase activity, acting on ester bonds;ion binding;metal ion binding	cell part;cytoplasm;intracellular membrane-bounded organelle;intracellular organelle;intracellular part;membrane-bounded organelle;nucleus;organelle	biological regulation;cellular ketone metabolic process;cellular metabolic process;cellular process;metabolic process;organic acid metabolic process;small molecule metabolic process	cell part;cytoplasm;intracellular membrane-bounded organelle;intracellular organelle;nucleus;organelle	Alanine, aspartate and glutamate metabolism;Histidine metabolism	AstE_AspA	AAANWWTGC_UNKNOWN;ACEVEDO_FGFR1_TARGETS_IN_PROSTATE_CANCER_MODEL_UP;AMINE_CATABOLIC_PROCESS;AMINE_METABOLIC_PROCESS;AMINO_ACID_AND_DERIVATIVE_METABOLIC_PROCESS;AMINO_ACID_CATABOLIC_PROCESS;AMINO_ACID_METABOLIC_PROCESS;ASTON_MAJOR_DEPRESSIVE_DISORDER_DN;BOQUEST_STEM_CELL_CULTURED_VS_FRESH_UP;BOQUEST_STEM_CELL_UP;BOYAULT_LIVER_CANCER_SUBCLASS_G123_DN;BRCA1_DN.V1_DN;BROWNE_HCMV_INFECTION_30MIN_UP;BR…	Completeproteome;Cytoplasm;Directproteinsequencing;Hydrolase;Metal-binding;Nucleus;Referenceproteome;Zinc		GO:0006082;GO:0006083;GO:0007272;GO:0008152;GO:0008366;GO:0009987;GO:0010720;GO:0014013;GO:0014015;GO:0019752;GO:0022010;GO:0032291;GO:0032787;GO:0042180;GO:0042552;GO:0043436;GO:0044237;GO:0044281;GO:0045595;GO:0045597;GO:0045685;GO:0045687;GO:0048518;GO:0048522;GO:0048713;GO:0048714;GO:0050767;GO:0050769;GO:0050789;GO:0050793;GO:0050794;GO:0051094;GO:0051239;GO:0051960;GO:0060284;GO:0065007;GO:…	GO:0003824;GO:0004046;GO:0005488;GO:0016787;GO:0016788;GO:0016810;GO:0016811;GO:0019807;GO:0043167;GO:0043169;GO:0046872	GO:0005634;GO:0005737;GO:0043226;GO:0043227;GO:0043229;GO:0043231;GO:0044424;GO:0044464	GO:0006082;GO:0008152;GO:0009987;GO:0042180;GO:0044237;GO:0044281;GO:0065007	GO:0005634;GO:0005737;GO:0043226;GO:0043229;GO:0043231;GO:0044464			1.1931e-12	857140000	0.272852	0.844512	0.325587	B0QZP3;V9GXG0;Q8R3P0	B0QZP3;V9GXG0;Q8R3P0	Aspartoacylase	Aspa
24.8817	24.9696	24.2368	24.7853	24.9558	24.7487	24.8407	25.0046	24.8093	24.9104	23.868	25.1479				cellular process;establishment of localization;establishment of localization in cell;establishment of protein localization;exocytosis;protein transport;secretion;secretion by cell;transport;vesicle-mediated transport		azurophil granule;cell junction;cell part;cell projection;cytoplasmic membrane-bounded vesicle;cytoplasmic part;cytoplasmic vesicle;Golgi apparatus;intracellular membrane-bounded organelle;intracellular organelle;intracellular part;lysosome;lytic vacuole;membrane;membrane-bounded organelle;membrane-bounded vesicle;neuron projection;nucleus;organelle;plasma membrane;primary lysosome;specific granu…	cellular process;establishment of localization;exocytosis;protein transport;secretion;transport;vesicle-mediated transport	cell part;cell projection;cytoplasmic membrane-bounded vesicle;Golgi apparatus;intracellular membrane-bounded organelle;intracellular organelle;lysosome;membrane;neuron projection;nucleus;organelle;plasma membrane;synapse;vacuole;vesicle	SNARE interactions in vesicular transport	SNAP-25;SNARE	BRUINS_UVC_RESPONSE_EARLY_LATE;BRUNO_HEMATOPOIESIS;BUYTAERT_PHOTODYNAMIC_THERAPY_STRESS_UP;BYSTRYKH_HEMATOPOIESIS_STEM_CELL_QTL_TRANS;CELLULAR_LOCALIZATION;chr15q14;CHUNG_BLISTER_CYTOTOXICITY_DN;CROONQUIST_NRAS_VS_STROMAL_STIMULATION_UP;CUI_TCF21_TARGETS_2_DN;CYTOSKELETON_ORGANIZATION_AND_BIOGENESIS;DIAZ_CHRONIC_MEYLOGENOUS_LEUKEMIA_UP;ESTABLISHMENT_OF_CELLULAR_LOCALIZATION;ESTABLISHMENT_OF_LOCAL…	Acetylation;Celljunction;Cellmembrane;Coiledcoil;Completeproteome;Lipoprotein;Membrane;Palmitate;Phosphoprotein;Proteintransport;Referenceproteome;Repeat;Synapse;Synaptosome;Transport	SNARE complex (Stx4, Vamp2, Snap23);SNARE complex (Stx4, Vamp8, Snap23)	GO:0006810;GO:0006887;GO:0009987;GO:0015031;GO:0016192;GO:0032940;GO:0045184;GO:0046903;GO:0051234;GO:0051649		GO:0000323;GO:0005634;GO:0005764;GO:0005766;GO:0005773;GO:0005794;GO:0005886;GO:0016020;GO:0016023;GO:0030054;GO:0030141;GO:0031410;GO:0031982;GO:0031988;GO:0042581;GO:0042582;GO:0042995;GO:0043005;GO:0043226;GO:0043227;GO:0043229;GO:0043231;GO:0044424;GO:0044444;GO:0044464;GO:0045202	GO:0006810;GO:0006887;GO:0009987;GO:0015031;GO:0016192;GO:0046903;GO:0051234	GO:0005634;GO:0005764;GO:0005773;GO:0005794;GO:0005886;GO:0016020;GO:0016023;GO:0031982;GO:0042995;GO:0043005;GO:0043226;GO:0043229;GO:0043231;GO:0044464;GO:0045202			1.4077e-09	222120000	0.158183	0.29702	0.203568	B0R030;O09044;Q9D3L3;B0R029;E9Q8A1	B0R030;O09044;Q9D3L3;B0R029;E9Q8A1	Synaptosomal-associated protein 23;Synaptosomal-associated protein	Snap23
28.1872	27.2626	27.9158	28.291	27.8326	28.252	27.4042	28.6801	27.732	27.6985	27.4475	28.0732				cellular component assembly;cellular component assembly at cellular level;cellular component biogenesis;cellular component organization;cellular component organization at cellular level;cellular component organization or biogenesis;cellular component organization or biogenesis at cellular level;cellular macromolecular complex assembly;cellular macromolecular complex subunit organization;cellular …		cell part;cytoplasmic part;intracellular membrane-bounded organelle;intracellular organelle;intracellular organelle part;intracellular part;membrane;membrane part;membrane-bounded organelle;membrane-enclosed lumen;mitochondrial inner membrane;mitochondrial intermembrane space;mitochondrial membrane;mitochondrial part;mitochondrion;organelle;organelle envelope lumen;organelle inner membrane;organe…	cellular component assembly;cellular component organization;cellular macromolecular complex assembly;cellular metabolic process;cellular process;generation of precursor metabolites and energy;macromolecular complex assembly;metabolic process;protein complex assembly;protein complex biogenesis	cell part;intracellular membrane-bounded organelle;intracellular organelle;membrane;mitochondrion;organelle	Alzheimer's disease;Huntington's disease;Oxidative phosphorylation;Parkinson's disease	Ndufs5	CELLULAR_COMPONENT_ASSEMBLY;CELLULAR_MACROMOLECULE_METABOLIC_PROCESS;CELLULAR_PROTEIN_COMPLEX_ASSEMBLY;CELLULAR_PROTEIN_METABOLIC_PROCESS;chr1p34;CYTOPLASM;CYTOPLASMIC_PART;FEVR_CTNNB1_TARGETS_UP;GSE10239_MEMORY_VS_DAY4.5_EFF_CD8_TCELL_UP;GSE10239_NAIVE_VS_MEMORY_CD8_TCELL_DN;GSE14308_NAIVE_CD4_TCELL_VS_INDUCED_TREG_DN;GSE14308_TH1_VS_NAIVE_CD4_TCELL_UP;GSE14308_TH2_VS_NAIVE_CD4_TCELL_UP;GSE14769…	Completeproteome;Directproteinsequencing;Disulfidebond;Electrontransport;Membrane;Mitochondrion;Mitochondrioninnermembrane;Referenceproteome;Respiratorychain;Transport	Respiratory chain complex I, mitochondrial	GO:0006091;GO:0006461;GO:0008152;GO:0009987;GO:0010257;GO:0016043;GO:0022607;GO:0022900;GO:0032981;GO:0033108;GO:0034621;GO:0034622;GO:0043623;GO:0043933;GO:0044085;GO:0044237;GO:0055114;GO:0065003;GO:0070271;GO:0071822;GO:0071840;GO:0071841;GO:0071842;GO:0071844;GO:0097031		GO:0005739;GO:0005743;GO:0005758;GO:0016020;GO:0019866;GO:0031090;GO:0031966;GO:0031970;GO:0031974;GO:0043226;GO:0043227;GO:0043229;GO:0043231;GO:0044422;GO:0044424;GO:0044425;GO:0044429;GO:0044444;GO:0044446;GO:0044464;GO:0070469	GO:0006091;GO:0006461;GO:0008152;GO:0009987;GO:0016043;GO:0022607;GO:0034622;GO:0044237;GO:0065003;GO:0070271	GO:0005739;GO:0016020;GO:0043226;GO:0043229;GO:0043231;GO:0044464			1.8804e-34	1978400000	0.233682	0.451626	0.304437	B1ARW4;Q99LY9	B1ARW4;Q99LY9	NADH dehydrogenase [ubiquinone] iron-sulfur protein 5;NADH dehydrogenase [ubiquinone] iron-sulfur protein 5, N-terminally processed	Ndufs5
28.7355	28.7712	28.5251	28.7947	29.0259	29.6686	29.3311	29.7286	29.0282	29.2539	28.9559	29.722				aging;alcohol metabolic process;anatomical structure development;biological regulation;cellular aldehyde metabolic process;cellular lipid metabolic process;cellular metabolic process;cellular process;central nervous system development;developmental process;epidermis development;isoprenoid metabolic process;lipid metabolic process;metabolic process;peripheral nervous system development;phytol meta…	3-chloroallyl aldehyde dehydrogenase activity;alcohol dehydrogenase (NADP+) activity;aldehyde dehydrogenase (NAD) activity;aldehyde dehydrogenase [NAD(P)+] activity;aldo-keto reductase (NADP) activity;catalytic activity;long-chain-alcohol oxidase activity;long-chain-aldehyde dehydrogenase activity;oxidoreductase activity;oxidoreductase activity, acting on CH-OH group of donors;oxidoreductase acti…	cell part;cytoplasmic part;cytosol;endoplasmic reticulum;endoplasmic reticulum membrane;endoplasmic reticulum part;integral to membrane;intracellular membrane-bounded organelle;intracellular organelle;intracellular organelle part;intracellular part;intrinsic to membrane;membrane;membrane part;membrane-bounded organelle;microbody;mitochondrial inner membrane;mitochondrial membrane;mitochondrial pa…	aging;alcohol metabolic process;anatomical structure development;biological regulation;cellular aldehyde metabolic process;cellular lipid metabolic process;cellular metabolic process;cellular process;developmental process;lipid metabolic process;metabolic process;primary metabolic process;response to chemical stimulus;response to drug;response to endogenous stimulus;response to external stimulus;…	cell part;cytosol;endoplasmic reticulum;intracellular membrane-bounded organelle;intracellular organelle;membrane;microbody;organelle;peroxisome	Arginine and proline metabolism;Ascorbate and aldarate metabolism;beta-Alanine metabolism;Chloroalkane and chloroalkene degradation;Drug metabolism - cytochrome P450;Fatty acid metabolism;Glycerolipid metabolism;Glycolysis / Gluconeogenesis;Histidine metabolism;Limonene and pinene degradation;Lysine degradation;Metabolism of xenobiotics by cytochrome P450;Pentose and glucuronate interconversions;…	Aldedh	ALDO_KETO_REDUCTASE_ACTIVITY;ANATOMICAL_STRUCTURE_DEVELOPMENT;BARRIER_CANCER_RELAPSE_NORMAL_SAMPLE_UP;BLALOCK_ALZHEIMERS_DISEASE_UP;BRUINS_UVC_RESPONSE_VIA_TP53_GROUP_B;BYSTRYKH_HEMATOPOIESIS_STEM_CELL_QTL_TRANS;CAIRO_HEPATOBLASTOMA_CLASSES_DN;CAIRO_LIVER_DEVELOPMENT_DN;CENTRAL_NERVOUS_SYSTEM_DEVELOPMENT;CHARAFE_BREAST_CANCER_LUMINAL_VS_BASAL_DN;CHEMNITZ_RESPONSE_TO_PROSTAGLANDIN_E2_DN;CHIANG_LIV…	Acetylation;Completeproteome;Cytoplasm;Endoplasmicreticulum;Membrane;NAD;NADP;Oxidoreductase;Polymorphism;Referenceproteome;Transmembrane;Transmembranehelix		GO:0001666;GO:0006066;GO:0006081;GO:0006629;GO:0006714;GO:0006720;GO:0006721;GO:0006950;GO:0007417;GO:0007422;GO:0007568;GO:0007584;GO:0008152;GO:0008284;GO:0008544;GO:0009605;GO:0009719;GO:0009725;GO:0009888;GO:0009987;GO:0009991;GO:0010033;GO:0031667;GO:0031960;GO:0032502;GO:0033306;GO:0042127;GO:0042214;GO:0042221;GO:0042493;GO:0044237;GO:0044238;GO:0044255;GO:0044281;GO:0048518;GO:0048522;GO:…	GO:0003824;GO:0004028;GO:0004029;GO:0004030;GO:0004033;GO:0008106;GO:0016491;GO:0016614;GO:0016616;GO:0016620;GO:0016899;GO:0016903;GO:0046577;GO:0050061	GO:0005743;GO:0005777;GO:0005783;GO:0005789;GO:0005829;GO:0016020;GO:0016021;GO:0019866;GO:0031090;GO:0031224;GO:0031966;GO:0042579;GO:0043226;GO:0043227;GO:0043229;GO:0043231;GO:0044422;GO:0044424;GO:0044425;GO:0044429;GO:0044432;GO:0044444;GO:0044446;GO:0044464	GO:0006066;GO:0006081;GO:0006629;GO:0006950;GO:0007568;GO:0008152;GO:0009605;GO:0009719;GO:0009987;GO:0009991;GO:0032502;GO:0042221;GO:0042493;GO:0044237;GO:0044238;GO:0044255;GO:0044281;GO:0048856;GO:0050896;GO:0065007	GO:0005777;GO:0005783;GO:0005829;GO:0016020;GO:0042579;GO:0043226;GO:0043229;GO:0043231;GO:0044464			1.4696e-83	3052300000	0.160459	0.361339	0.198572	P47740;B1AV77;B1ATI0;P47739	P47740;B1AV77;B1ATI0	Fatty aldehyde dehydrogenase	Aldh3a2
24.1865	23.8731	23.7332	24.5676	24.4311	24.4931	24.5564	24.0001	24.1836	24.2875	24.1411	24.1212				cellular macromolecule metabolic process;cellular metabolic process;cellular process;cellular protein metabolic process;cullin deneddylation;macromolecule metabolic process;macromolecule modification;metabolic process;primary metabolic process;protein deneddylation;protein metabolic process;protein modification by small protein conjugation or removal;protein modification by small protein removal;…		cell part;cytoplasm;intracellular organelle part;intracellular part;macromolecular complex;nuclear part;organelle part;protein complex;signalosome	cellular metabolic process;cellular process;macromolecule metabolic process;macromolecule modification;metabolic process;primary metabolic process;protein metabolic process;protein modification by small protein conjugation or removal;protein modification process	cell part;cytoplasm;macromolecular complex;protein complex		PCI;RPN7	ACEVEDO_LIVER_CANCER_WITH_H3K9ME3_UP;BENPORATH_OCT4_TARGETS;BERNARD_PPAPDC1B_TARGETS_UP;CACGTG_V$MYC_Q2;CAIRO_HEPATOBLASTOMA_CLASSES_UP;CELL_CYCLE_GO_0007049;chr17q25;DOANE_RESPONSE_TO_ANDROGEN_UP;ELVIDGE_HYPOXIA_DN;ENZYME_INHIBITOR_ACTIVITY;ENZYME_REGULATOR_ACTIVITY;GOLDRATH_NAIVE_VS_EFF_CD8_TCELL_UP;GSE11864_CSF1_IFNG_VS_CSF1_IFNG_PAM3CYS_IN_MAC_UP;GSE11864_UNTREATED_VS_CSF1_IFNG_IN_MAC_UP;GSE1…	Alternativesplicing;Completeproteome;Cytoplasm;Nucleus;Phosphoprotein;Referenceproteome;Signalosome	COP9 signalosome complex (CSN);COP9 signalosome complex (Gps1, Cops1, Cops2, Cops3, Cops4, Cops5, Cops6, Cops7a, Cops7b, Cops8)	GO:0000338;GO:0006464;GO:0008152;GO:0009987;GO:0010388;GO:0019538;GO:0043170;GO:0043412;GO:0044237;GO:0044238;GO:0044260;GO:0044267;GO:0070646;GO:0070647		GO:0005737;GO:0008180;GO:0032991;GO:0043234;GO:0044422;GO:0044424;GO:0044428;GO:0044446;GO:0044464	GO:0006464;GO:0008152;GO:0009987;GO:0019538;GO:0043170;GO:0043412;GO:0044237;GO:0044238;GO:0070647	GO:0005737;GO:0032991;GO:0043234;GO:0044464			3.4027e-06	136350000	0.165154	0.688893	0.186846	Q99LD4;Q3MIA8;B1ATU4;G3UXW9	Q99LD4;Q3MIA8;B1ATU4;G3UXW9	COP9 signalosome complex subunit 1	Gps1
27.6817	27.8684	26.8284	27.5595	26.8174	26.7848	27.2918	26.7919	27.8539	26.4315	27.3684	27.7664				cellular component organization;cellular component organization or biogenesis;cellular membrane organization;cellular process;endocytosis;establishment of localization;establishment of localization in cell;establishment of protein localization;intracellular protein transport;intracellular transport;membrane invagination;membrane organization;protein transport;transport;vesicle-mediated transport	binding;peptide binding;structural molecule activity	cell part;clathrin coat;clathrin coat of coated pit;clathrin coat of trans-Golgi network vesicle;clathrin vesicle coat;cytoplasmic membrane-bounded vesicle;cytoplasmic part;cytoplasmic vesicle;cytoplasmic vesicle part;Golgi apparatus part;intracellular membrane-bounded organelle;intracellular organelle;intracellular organelle part;intracellular part;macromolecular complex;membrane coat;membrane p…	cellular component organization;cellular membrane organization;cellular process;endocytosis;establishment of localization;membrane invagination;membrane organization;protein transport;transport;vesicle-mediated transport	cell part;cytoplasmic membrane-bounded vesicle;intracellular membrane-bounded organelle;intracellular organelle;macromolecular complex;organelle;protein complex;vesicle	Bacterial invasion of epithelial cells;Endocrine and other factor-regulated calcium reabsorption;Endocytosis;Huntington's disease;Lysosome	Clathrin_lg_ch	AACTTT_UNKNOWN;ACACTAC,MIR-142-3P;AGUIRRE_PANCREATIC_CANCER_COPY_NUMBER_UP;ATGTTTC,MIR-494;BERENJENO_TRANSFORMED_BY_RHOA_DN;BONOME_OVARIAN_CANCER_SURVIVAL_OPTIMAL_DEBULKING;CHNG_MULTIPLE_MYELOMA_HYPERPLOID_UP;chr12q23;CHUNG_BLISTER_CYTOTOXICITY_UP;ENK_UV_RESPONSE_KERATINOCYTE_UP;GATTGGY_V$NFY_Q6_01;GREGORY_SYNTHETIC_LETHAL_WITH_IMATINIB;GSE11057_NAIVE_CD4_VS_PBMC_CD4_TCELL_DN;GSE12845_IGD_POS_BLO…	Calcium;Coatedpit;Completeproteome;Cytoplasmicvesicle;Membrane;Phosphoprotein;Referenceproteome		GO:0006810;GO:0006886;GO:0006897;GO:0009987;GO:0010324;GO:0015031;GO:0016043;GO:0016044;GO:0016192;GO:0045184;GO:0046907;GO:0051234;GO:0051649;GO:0061024;GO:0071840	GO:0005198;GO:0005488;GO:0042277	GO:0016023;GO:0030117;GO:0030118;GO:0030120;GO:0030125;GO:0030130;GO:0030132;GO:0031410;GO:0031982;GO:0031988;GO:0032991;GO:0043226;GO:0043227;GO:0043229;GO:0043231;GO:0043234;GO:0044422;GO:0044424;GO:0044425;GO:0044431;GO:0044433;GO:0044444;GO:0044446;GO:0044459;GO:0044464	GO:0006810;GO:0006897;GO:0009987;GO:0010324;GO:0015031;GO:0016043;GO:0016044;GO:0016192;GO:0051234;GO:0061024	GO:0016023;GO:0031982;GO:0032991;GO:0043226;GO:0043229;GO:0043231;GO:0043234;GO:0044464			5.6258e-81	1302600000	-0.321598	0.585933	-0.43357	B1AWE0;Q6PFA2;B1AWE1;O08585;B1AWD8;B1AWD9	B1AWE0;Q6PFA2;B1AWE1;O08585;B1AWD8;B1AWD9	Clathrin light chain A	Clta
27.6979	27.7475	27.9979	28.0603	27.9363	27.5633	27.6395	27.8544	28.1401	27.8674	28.1389	28.4203					binding;calcium ion binding;cation binding;ion binding;metal ion binding	cell part;cytoplasm;intracellular part		cell part;cytoplasm		CH;EF_hand_5	ACEVEDO_LIVER_CANCER_UP;AMUNDSON_POOR_SURVIVAL_AFTER_GAMMA_RADIATION_2G;ATTCTTT,MIR-186;BAELDE_DIABETIC_NEPHROPATHY_DN;BENPORATH_SUZ12_TARGETS;BLUM_RESPONSE_TO_SALIRASIB_DN;BRUINS_UVC_RESPONSE_LATE;CAGCTG_V$AP4_Q5;CAGTATT,MIR-200B,MIR-200C,MIR-429;CAIRO_LIVER_DEVELOPMENT_UP;CAMP_UP.V1_DN;CHARAFE_BREAST_CANCER_LUMINAL_VS_BASAL_DN;chrxq24;DANG_REGULATED_BY_MYC_DN;FLECHNER_BIOPSY_KIDNEY_TRANSPLANT_O…	Actin-binding;Calcium;Completeproteome;Cytoplasm;Directproteinsequencing;Isopeptidebond;Metal-binding;Phosphoprotein;Referenceproteome;Repeat;Ublconjugation			GO:0005488;GO:0005509;GO:0043167;GO:0043169;GO:0046872	GO:0005737;GO:0044424;GO:0044464		GO:0005737;GO:0044464		+	3.7305e-60	1870100000	-0.344097	1.47746	-0.393318	Q99K51;B1AX58	Q99K51;B1AX58	Plastin-3	Pls3
25.592	25.7794	25.5357	26.1042	26.3612	25.9792	26.6373	26.0436	26.1497	26.09	25.7676	26.1819										Cobl	AMIT_SERUM_RESPONSE_60_MCF10A;ATF2_S_UP.V1_DN;ATGTACA,MIR-493;BASAKI_YBX1_TARGETS_DN;BOYAULT_LIVER_CANCER_SUBCLASS_G23_DN;chr2q24;COLDREN_GEFITINIB_RESISTANCE_DN;CREIGHTON_ENDOCRINE_THERAPY_RESISTANCE_5;DURCHDEWALD_SKIN_CARCINOGENESIS_DN;DUTERTRE_ESTRADIOL_RESPONSE_24HR_DN;FLECHNER_BIOPSY_KIDNEY_TRANSPLANT_REJECTED_VS_OK_DN;GABRIELY_MIR21_TARGETS;GEORGES_TARGETS_OF_MIR192_AND_MIR215;GOZGIT_ESR1_T…	Alternativesplicing;Completeproteome;Phosphoprotein;Referenceproteome									2.7164e-19	454750000	0.176325	0.536535	0.207982	B1AZ15;B1AZ14;Q3UMF0;B1AZ26	B1AZ15;B1AZ14;Q3UMF0	Cordon-bleu protein-like 1	Cobll1
26.1507	26.6023	26.5595	27.1573	27.1588	25.9155	27.1767	26.8747	25.5323	27.0455	26.4209	27.3158				anatomical structure development;anatomical structure formation involved in morphogenesis;anatomical structure morphogenesis;angiogenesis;brain development;cardiac muscle tissue development;cartilage development;cartilage development involved in endochondral bone morphogenesis;cell differentiation;cellular component organization;cellular component organization at cellular level;cellular component…	binding;cation binding;ion binding;metal ion binding	basal lamina;cell part;cytoplasmic part;extracellular matrix part;extracellular region part;extracellular space;Golgi apparatus part;Golgi lumen;intracellular organelle lumen;intracellular organelle part;intracellular part;membrane-enclosed lumen;organelle lumen;organelle part	anatomical structure development;anatomical structure formation involved in morphogenesis;anatomical structure morphogenesis;cell differentiation;cellular component organization;cellular process;developmental process;extracellular matrix organization;extracellular structure organization;localization;multicellular organismal process	cell part;extracellular space	ECM-receptor interaction	EGF;hEGF;I-set;Laminin_B;Laminin_EGF;Laminin_G_1;Laminin_G_2;Ldl_recept_a	AACTTT_UNKNOWN;AZARE_NEOPLASTIC_TRANSFORMATION_BY_STAT3_UP;BERTUCCI_MEDULLARY_VS_DUCTAL_BREAST_CANCER_DN;BONCI_TARGETS_OF_MIR15A_AND_MIR16_1;BROWNE_HCMV_INFECTION_48HR_DN;CATTGTYY_V$SOX9_B1;CCCNNNNNNAAGWT_UNKNOWN;chr1p36;CSR_EARLY_UP.V1_DN;CYCLIN_D1_KE_.V1_UP;CYCLIN_D1_UP.V1_UP;CYTAGCAAY_UNKNOWN;DIAZ_CHRONIC_MEYLOGENOUS_LEUKEMIA_UP;GAGCCTG,MIR-484;GCNP_SHH_UP_LATE.V1_DN;GGARNTKYCCA_UNKNOWN;GGCAGC…	3D-structure;Angiogenesis;Basementmembrane;Calcium;Completeproteome;Directproteinsequencing;Disulfidebond;EGF-likedomain;Extracellularmatrix;Glycoprotein;Heparansulfate;Immunoglobulindomain;LamininEGF-likedomain;Metal-binding;Proteoglycan;Referenceproteome;Repeat;Secreted;Signal		GO:0001503;GO:0001525;GO:0001958;GO:0002062;GO:0007420;GO:0008104;GO:0009653;GO:0009887;GO:0009888;GO:0009987;GO:0014706;GO:0016043;GO:0030154;GO:0030198;GO:0032501;GO:0032502;GO:0033036;GO:0043062;GO:0048513;GO:0048562;GO:0048598;GO:0048646;GO:0048704;GO:0048705;GO:0048738;GO:0048856;GO:0048869;GO:0051179;GO:0051216;GO:0060351;GO:0060537;GO:0071840;GO:0071841;GO:0071842	GO:0005488;GO:0043167;GO:0043169;GO:0046872	GO:0005605;GO:0005615;GO:0005796;GO:0031974;GO:0043233;GO:0044420;GO:0044421;GO:0044422;GO:0044424;GO:0044431;GO:0044444;GO:0044446;GO:0044464;GO:0070013	GO:0009653;GO:0009987;GO:0016043;GO:0030154;GO:0030198;GO:0032501;GO:0032502;GO:0043062;GO:0048646;GO:0048856;GO:0051179	GO:0005615;GO:0044464			9.0467e-43	846620000	0.135656	0.157278	0.202784	Q05793;B1B0C7;E9PZ16	Q05793;B1B0C7;E9PZ16	Basement membrane-specific heparan sulfate proteoglycan core protein;Endorepellin;LG3 peptide	Hspg2
25.3151	25.2488	25.2587	25.727	26.1044	25.3051	25.8209	25.9204	25.7562	26.8234	25.8624	26.5335				anatomical structure morphogenesis;aorta smooth muscle tissue morphogenesis;biological regulation;bleb assembly;cell projection assembly;cell projection organization;cellular component assembly;cellular component assembly at cellular level;cellular component organization;cellular component organization at cellular level;cellular component organization or biogenesis;cellular component organization…	adenyl nucleotide binding;adenyl ribonucleotide binding;ATP binding;binding;catalytic activity;cation binding;ion binding;kinase activity;metal ion binding;myosin light chain kinase activity;nucleotide binding;phosphotransferase activity, alcohol group as acceptor;protein kinase activity;protein serine/threonine kinase activity;purine nucleotide binding;purine ribonucleoside triphosphate binding;…	actin filament bundle;actomyosin;cell division site part;cell part;cell projection;cleavage furrow;cytoplasm;cytoskeletal part;cytoskeleton;intracellular non-membrane-bounded organelle;intracellular organelle;intracellular organelle part;intracellular part;lamellipodium;membrane;non-membrane-bounded organelle;organelle;organelle part;plasma membrane;stress fiber	anatomical structure morphogenesis;biological regulation;cellular component assembly;cellular component organization;cellular process;developmental process;multicellular organismal process;muscle contraction;regulation of transport;response to abiotic stimulus;response to osmotic stress;response to stimulus;response to stress	cell part;cell projection;cytoplasm;cytoskeleton;intracellular non-membrane-bounded organelle;intracellular organelle;membrane;organelle;plasma membrane	Calcium signaling pathway;Focal adhesion;Gastric acid secretion;Regulation of actin cytoskeleton;Vascular smooth muscle contraction	fn3;I-set;Pkinase	AAAGGAT,MIR-501;AAANWWTGC_UNKNOWN;AACATTC,MIR-409-3P;ACATTCC,MIR-1,MIR-206;ACEVEDO_FGFR1_TARGETS_IN_PROSTATE_CANCER_MODEL_DN;ALFANO_MYC_TARGETS;BAELDE_DIABETIC_NEPHROPATHY_DN;BERTUCCI_MEDULLARY_VS_DUCTAL_BREAST_CANCER_DN;BIOCARTA_BIOPEPTIDES_PATHWAY;BIOCARTA_ECM_PATHWAY;BIOCARTA_MCALPAIN_PATHWAY;BIOCARTA_MYOSIN_PATHWAY;BIOCARTA_RAC1_PATHWAY;BIOCARTA_RHO_PATHWAY;BIOPOLYMER_METABOLIC_PROCESS;BIOPOL…	Actin-binding;Alternativeinitiation;Alternativepromoterusage;Alternativesplicing;ATP-binding;Calcium;Calmodulin-binding;Cellprojection;Completeproteome;Cytoplasm;Cytoskeleton;Disulfidebond;Immunoglobulindomain;Kinase;Magnesium;Metal-binding;Nucleotide-binding;Phosphoprotein;Referenceproteome;Repeat;Serine/threonine-proteinkinase;Transferase		GO:0003008;GO:0003012;GO:0006936;GO:0006939;GO:0006950;GO:0006970;GO:0006971;GO:0009628;GO:0009653;GO:0009987;GO:0010959;GO:0014820;GO:0016043;GO:0022607;GO:0030030;GO:0030031;GO:0030334;GO:0030335;GO:0032060;GO:0032501;GO:0032502;GO:0032879;GO:0033554;GO:0040012;GO:0040017;GO:0043269;GO:0043270;GO:0048518;GO:0048522;GO:0048583;GO:0048584;GO:0048729;GO:0050789;GO:0050794;GO:0050896;GO:0051049;GO:…	GO:0000166;GO:0003824;GO:0004672;GO:0004674;GO:0004687;GO:0005488;GO:0005524;GO:0016301;GO:0016740;GO:0016772;GO:0016773;GO:0017076;GO:0030554;GO:0032553;GO:0032555;GO:0032559;GO:0035639;GO:0043167;GO:0043169;GO:0046872	GO:0001725;GO:0005737;GO:0005856;GO:0005886;GO:0016020;GO:0030027;GO:0032154;GO:0032155;GO:0032432;GO:0042641;GO:0042995;GO:0043226;GO:0043228;GO:0043229;GO:0043232;GO:0044422;GO:0044424;GO:0044430;GO:0044446;GO:0044464	GO:0006936;GO:0006950;GO:0006970;GO:0009628;GO:0009653;GO:0009987;GO:0016043;GO:0022607;GO:0032501;GO:0032502;GO:0050896;GO:0051049;GO:0065007	GO:0005737;GO:0005856;GO:0005886;GO:0016020;GO:0042995;GO:0043226;GO:0043229;GO:0043232;GO:0044464			1.5637e-23	411850000	-0.348146	0.716989	-0.456154	Q6PDN3;B1B1A8	Q6PDN3;B1B1A8	Myosin light chain kinase, smooth muscle;Myosin light chain kinase, smooth muscle, deglutamylated form	Mylk
30.5475	30.452	30.6504	30.6434	30.4332	30.3211	30.5634	30.4042	30.5041	30.2824	30.7622	30.9212				biological regulation;cellular macromolecule metabolic process;cellular metabolic process;cellular nitrogen compound metabolic process;cellular process;macromolecule metabolic process;metabolic process;mRNA metabolic process;mRNA processing;nitrogen compound metabolic process;nucleic acid metabolic process;nucleobase-containing compound metabolic process;positive regulation of biological process;…	binding;core promoter proximal region DNA binding;core promoter proximal region sequence-specific DNA binding;DNA binding;nucleic acid binding;nucleic acid binding transcription factor activity;regulatory region DNA binding;regulatory region nucleic acid binding;RNA binding;RNA polymerase II core promoter proximal region sequence-specific DNA binding;RNA polymerase II core promoter proximal regio…	catalytic step 2 spliceosome;cell part;chromatin;chromosomal part;cytoplasm;intracellular organelle part;intracellular part;macromolecular complex;nuclear chromatin;nuclear chromosome part;nuclear part;nucleoplasm;organelle part;ribonucleoprotein complex;spliceosomal complex	biological regulation;cellular metabolic process;cellular nitrogen compound metabolic process;cellular process;macromolecule metabolic process;metabolic process;mRNA metabolic process;mRNA processing;nitrogen compound metabolic process;nucleobase-containing compound metabolic process;primary metabolic process;regulation of transport;RNA metabolic process;RNA processing;RNA splicing	cell part;cytoplasm;macromolecular complex;nucleoplasm;ribonucleoprotein complex;spliceosomal complex	Spliceosome	KH_1;KH_3;ROKNT	AACATTC,MIR-409-3P;ACAGGGT,MIR-10A,MIR-10B;ACATTCC,MIR-1,MIR-206;ACCATTT,MIR-522;AGCTCCT,MIR-28;ATAAGCT,MIR-21;BENPORATH_SOX2_TARGETS;BIDUS_METASTASIS_UP;BLALOCK_ALZHEIMERS_DISEASE_DN;CAGTATT,MIR-200B,MIR-200C,MIR-429;CASORELLI_ACUTE_PROMYELOCYTIC_LEUKEMIA_DN;chr9q21;CTTTGT_V$LEF1_Q2;CTTTGTA,MIR-524;CYTOPLASM;DIAZ_CHRONIC_MEYLOGENOUS_LEUKEMIA_UP;FLECHNER_BIOPSY_KIDNEY_TRANSPLANT_OK_VS_DONOR_UP;GA…	Acetylation;Activator;Alternativesplicing;Celljunction;Cellprojection;Completeproteome;Cytoplasm;Directproteinsequencing;DNA-binding;Glycoprotein;Isopeptidebond;Methylation;mRNAprocessing;mRNAsplicing;Nucleus;Phosphoprotein;Referenceproteome;Repeat;Repressor;Ribonucleoprotein;RNA-binding;Spliceosome;Transcription;Transcriptionregulation;Ublconjugation;Viralnucleoprotein;Virion		GO:0006139;GO:0006355;GO:0006357;GO:0006396;GO:0006397;GO:0006807;GO:0008152;GO:0008380;GO:0009889;GO:0009891;GO:0009893;GO:0009987;GO:0010468;GO:0010556;GO:0010557;GO:0010604;GO:0010628;GO:0010869;GO:0010870;GO:0010941;GO:0010984;GO:0010988;GO:0016070;GO:0016071;GO:0019219;GO:0019222;GO:0030100;GO:0031323;GO:0031325;GO:0031326;GO:0031328;GO:0032368;GO:0032879;GO:0034641;GO:0042981;GO:0043067;GO:…	GO:0000975;GO:0000976;GO:0000977;GO:0000978;GO:0000981;GO:0000982;GO:0000987;GO:0001012;GO:0001067;GO:0001071;GO:0001077;GO:0001159;GO:0003676;GO:0003677;GO:0003700;GO:0003723;GO:0005488;GO:0043565;GO:0044212	GO:0000785;GO:0000790;GO:0005654;GO:0005681;GO:0005737;GO:0030529;GO:0032991;GO:0044422;GO:0044424;GO:0044427;GO:0044428;GO:0044446;GO:0044454;GO:0044464;GO:0071013	GO:0006139;GO:0006396;GO:0006397;GO:0006807;GO:0008152;GO:0008380;GO:0009987;GO:0016070;GO:0016071;GO:0034641;GO:0043170;GO:0044237;GO:0044238;GO:0051049;GO:0065007	GO:0005654;GO:0005681;GO:0005737;GO:0030529;GO:0032991;GO:0044464			1.6441e-265	10735000000	-0.162671	0.588537	-0.187012	B2M1R6;P61979;H3BKD0;H3BLL4;D3Z5X4;D3YWG1;H3BK96;H3BKI8;Q8BT23;H3BJ43;H3BLP7;H3BJS9	B2M1R6;P61979;H3BKD0;H3BLL4;D3Z5X4;D3YWG1;H3BK96	Heterogeneous nuclear ribonucleoprotein K	Hnrnpk;Gm7964
25.5367	25.4982	25.0565	25.5193	24.9337	25.4818	24.5094	24.8752	25.3438	25.4802	24.166	25.2661					binding;nucleic acid binding	cell part;cytoplasmic part;intracellular membrane-bounded organelle;intracellular organelle;intracellular part;membrane-bounded organelle;mitochondrion;organelle		cell part;intracellular membrane-bounded organelle;intracellular organelle;mitochondrion;organelle		CHCH;DUF4371	ALONSO_METASTASIS_UP;BLALOCK_ALZHEIMERS_DISEASE_DN;CAIRO_HEPATOBLASTOMA_CLASSES_UP;CHIANG_LIVER_CANCER_SUBCLASS_UNANNOTATED_DN;chr7p11;FIGUEROA_AML_METHYLATION_CLUSTER_1_UP;FIGUEROA_AML_METHYLATION_CLUSTER_3_UP;FIGUEROA_AML_METHYLATION_CLUSTER_4_UP;GAVIN_FOXP3_TARGETS_CLUSTER_T7;GRADE_COLON_AND_RECTAL_CANCER_UP;GRADE_COLON_CANCER_UP;GSE12845_NAIVE_VS_PRE_GC_TONSIL_BCELL_DN;GSE14308_TH1_VS_NATURAL…	Completeproteome;Mitochondrion;Phosphoprotein;Referenceproteome;Transitpeptide			GO:0003676;GO:0005488	GO:0005739;GO:0043226;GO:0043227;GO:0043229;GO:0043231;GO:0044424;GO:0044444;GO:0044464		GO:0005739;GO:0043226;GO:0043229;GO:0043231;GO:0044464			6.6569e-18	283420000	-0.0836491	0.116845	-0.114017	Q9D1L0;D3Z5B1;B2RPU8	Q9D1L0;D3Z5B1;B2RPU8	Coiled-coil-helix-coiled-coil-helix domain-containing protein 2, mitochondrial	Chchd2;2410018M08Rik
25.6576	25.7963	25.5281	26.2327	26.0299	25.4387	26.0937	25.536	25.9766	26.1184	25.6698	26.429					catalytic activity;hydrolase activity;hydrolase activity, acting on acid anhydrides;hydrolase activity, acting on acid anhydrides, in phosphorus-containing anhydrides;motor activity;nucleoside-triphosphatase activity;pyrophosphatase activity	actin cytoskeleton;apical junction complex;cell junction;cell part;cell-cell junction;cytoskeletal part;cytoskeleton;intracellular non-membrane-bounded organelle;intracellular organelle;intracellular organelle part;intracellular part;macromolecular complex;myosin complex;non-membrane-bounded organelle;occluding junction;organelle;organelle part;protein complex;tight junction		cell part;cytoskeleton;intracellular non-membrane-bounded organelle;intracellular organelle;macromolecular complex;organelle;protein complex		Myosin_tail_1	BASAKI_YBX1_TARGETS_DN;chr15q21;CTACCTC,LET-7A,LET-7B,LET-7C,LET-7D,LET-7E,LET-7F,MIR-98,LET-7G,LET-7I;CTTTGT_V$LEF1_Q2;ESC_V6.5_UP_EARLY.V1_UP;GACAATC,MIR-219;GEORGES_TARGETS_OF_MIR192_AND_MIR215;GRAESSMANN_APOPTOSIS_BY_DOXORUBICIN_DN;GRAESSMANN_RESPONSE_TO_MC_AND_DOXORUBICIN_DN;GSE15659_CD45RA_NEG_CD4_TCELL_VS_NONSUPPRESSIVE_TCELL_UP;GSE15659_NAIVE_CD4_TCELL_VS_ACTIVATED_TREG_UP;GSE15659_NAIVE_…	Alternativesplicing;Celljunction;Coiledcoil;Completeproteome;Phosphoprotein;Referenceproteome;Tightjunction			GO:0003774;GO:0003824;GO:0016462;GO:0016787;GO:0016817;GO:0016818;GO:0017111	GO:0005856;GO:0005911;GO:0005923;GO:0015629;GO:0016459;GO:0030054;GO:0032991;GO:0043226;GO:0043228;GO:0043229;GO:0043232;GO:0043234;GO:0043296;GO:0044422;GO:0044424;GO:0044430;GO:0044446;GO:0044464;GO:0070160		GO:0005856;GO:0032991;GO:0043226;GO:0043229;GO:0043232;GO:0043234;GO:0044464			2.1325e-35	447700000	-0.222651	0.55472	-0.273869	B2RSU6;Q6AW69;D3Z3H4	B2RSU6;Q6AW69;D3Z3H4	Cingulin-like protein 1	Cgnl1
28.9018	29.0413	29.4826	29.545	29.226	28.6916	28.9515	29.1296	29.6209	29.8154	29.3184	29.8007				actin crosslink formation;actin cytoskeleton organization;actin cytoskeleton reorganization;actin filament organization;actin filament-based process;anatomical structure formation involved in morphogenesis;anatomical structure morphogenesis;biological regulation;cAMP-mediated signaling;cell cycle process;cell morphogenesis;cell morphogenesis involved in differentiation;cell projection assembly;ce…	actin binding;actin filament binding;binding;cytoskeletal protein binding;enzyme binding;Fc-gamma receptor I complex binding;glycoprotein binding;GTPase binding;immunoglobulin receptor binding;kinase binding;molecular transducer activity;protein binding;protein kinase binding;protein kinase C binding;Rac GTPase binding;Ras GTPase binding;receptor binding;Rho GTPase binding;signal transducer activ…	actin cytoskeleton;cell cortex;cell part;chromosomal part;cytoplasm;cytoplasmic part;cytoskeleton;Golgi apparatus part;intracellular membrane-bounded organelle;intracellular non-membrane-bounded organelle;intracellular organelle;intracellular organelle part;intracellular part;macromolecular complex;membrane;membrane-bounded organelle;Myb complex;non-membrane-bounded organelle;nucleus;organelle;or…	anatomical structure formation involved in morphogenesis;anatomical structure morphogenesis;biological regulation;cell morphogenesis;cellular component assembly;cellular component morphogenesis;cellular component organization;cellular localization;cellular membrane organization;cellular process;cytoskeleton organization;developmental process;endosome transport;establishment of localization;locali…	cell cortex;cell part;cytoplasm;cytoskeleton;intracellular membrane-bounded organelle;intracellular non-membrane-bounded organelle;intracellular organelle;macromolecular complex;membrane;nucleus;organelle;plasma membrane;protein complex	Focal adhesion;MAPK signaling pathway	CH;Filamin	ACEVEDO_FGFR1_TARGETS_IN_PROSTATE_CANCER_MODEL_DN;ACTIN_BINDING;ACTIN_CYTOSKELETON;ACTIN_CYTOSKELETON_ORGANIZATION_AND_BIOGENESIS;ACTIN_FILAMENT_BASED_PROCESS;ACTIN_FILAMENT_BINDING;ANATOMICAL_STRUCTURE_DEVELOPMENT;BAELDE_DIABETIC_NEPHROPATHY_DN;BASAKI_YBX1_TARGETS_UP;BERTUCCI_MEDULLARY_VS_DUCTAL_BREAST_CANCER_DN;BLALOCK_ALZHEIMERS_DISEASE_UP;BOGNI_TREATMENT_RELATED_MYELOID_LEUKEMIA_UP;BORCZUK_MA…	Acetylation;Actin-binding;Alternativesplicing;Ciliumbiogenesis/degradation;Completeproteome;Cytoplasm;Cytoskeleton;Phosphoprotein;Referenceproteome;Repeat		GO:0000226;GO:0000902;GO:0000904;GO:0001837;GO:0006140;GO:0006355;GO:0006810;GO:0006996;GO:0007010;GO:0007015;GO:0007017;GO:0007051;GO:0007052;GO:0007165;GO:0007166;GO:0007186;GO:0007187;GO:0007188;GO:0007193;GO:0007194;GO:0007195;GO:0007212;GO:0008104;GO:0009653;GO:0009889;GO:0009892;GO:0009894;GO:0009895;GO:0009966;GO:0009967;GO:0009987;GO:0010468;GO:0010556;GO:0010605;GO:0010608;GO:0010627;GO:…	GO:0001948;GO:0003779;GO:0004871;GO:0005080;GO:0005102;GO:0005488;GO:0005515;GO:0008092;GO:0008134;GO:0017016;GO:0017048;GO:0019899;GO:0019900;GO:0019901;GO:0031267;GO:0034987;GO:0034988;GO:0048365;GO:0051015;GO:0051020;GO:0060089	GO:0005634;GO:0005737;GO:0005802;GO:0005856;GO:0005886;GO:0005938;GO:0015629;GO:0016020;GO:0031523;GO:0032991;GO:0043226;GO:0043227;GO:0043228;GO:0043229;GO:0043231;GO:0043232;GO:0043234;GO:0044422;GO:0044424;GO:0044427;GO:0044431;GO:0044444;GO:0044446;GO:0044464	GO:0000902;GO:0006810;GO:0006996;GO:0007010;GO:0007165;GO:0009653;GO:0009987;GO:0016043;GO:0016044;GO:0016192;GO:0016197;GO:0022607;GO:0031647;GO:0032502;GO:0032989;GO:0048646;GO:0050896;GO:0051049;GO:0051179;GO:0051234;GO:0051641;GO:0061024;GO:0065007;GO:0070925	GO:0005634;GO:0005737;GO:0005856;GO:0005886;GO:0005938;GO:0016020;GO:0032991;GO:0043226;GO:0043229;GO:0043231;GO:0043232;GO:0043234;GO:0044464		+	4.0294e-120	4585100000	-0.548736	2.08747	-0.63914	B7FAV1;B7FAU9;Q8BTM8;F6XC15;J3JS91	B7FAV1;B7FAU9;Q8BTM8	Filamin-A	Flna
26.8272	26.6862	26.8281	26.9453	26.9669	27.0269	27.1343	26.5427	27.1264	27.1213	27.1071	27.1123				biological regulation;cellular macromolecule metabolic process;cellular metabolic process;cellular nitrogen compound metabolic process;cellular process;cellular protein metabolic process;cellular response to stimulus;cellular response to stress;DNA metabolic process;DNA repair;error-free postreplication DNA repair;macromolecule metabolic process;macromolecule modification;metabolic process;negati…	acid-amino acid ligase activity;catalytic activity;ligase activity;ligase activity, forming carbon-nitrogen bonds	cell part;intracellular membrane-bounded organelle;intracellular organelle;intracellular part;macromolecular complex;membrane-bounded organelle;nucleus;organelle;protein complex;UBC13-UEV1A complex;ubiquitin conjugating enzyme complex;ubiquitin ligase complex	biological regulation;cellular metabolic process;cellular nitrogen compound metabolic process;cellular process;DNA metabolic process;DNA repair;macromolecule metabolic process;macromolecule modification;metabolic process;nitrogen compound metabolic process;nucleobase-containing compound metabolic process;primary metabolic process;protein metabolic process;protein modification by small protein con…	cell part;intracellular membrane-bounded organelle;intracellular organelle;macromolecular complex;nucleus;organelle;protein complex;ubiquitin conjugating enzyme complex;ubiquitin ligase complex		Kua-UEV1_localn;UQ_con	ACEVEDO_LIVER_CANCER_UP;ACEVEDO_NORMAL_TISSUE_ADJACENT_TO_LIVER_TUMOR_UP;ACTGTGA,MIR-27A,MIR-27B;ACTIVATION_OF_NF_KAPPAB_TRANSCRIPTION_FACTOR;AGGAAGC,MIR-516-3P;AGTCTTA,MIR-499;ATGTACA,MIR-493;ATGTTAA,MIR-302C;BIOPOLYMER_CATABOLIC_PROCESS;BIOPOLYMER_METABOLIC_PROCESS;BIOPOLYMER_MODIFICATION;BONCI_TARGETS_OF_MIR15A_AND_MIR16_1;BOYAULT_LIVER_CANCER_SUBCLASS_G3_UP;BURTON_ADIPOGENESIS_12;BYSTRYKH_HEM…	Acetylation;Alternativesplicing;Completeproteome;Nucleus;Referenceproteome;Ublconjugationpathway		GO:0000209;GO:0006139;GO:0006259;GO:0006281;GO:0006282;GO:0006301;GO:0006464;GO:0006807;GO:0006950;GO:0006974;GO:0008152;GO:0009893;GO:0009894;GO:0009896;GO:0009987;GO:0010604;GO:0010941;GO:0010975;GO:0010976;GO:0016567;GO:0019219;GO:0019222;GO:0019538;GO:0030162;GO:0031323;GO:0031325;GO:0031329;GO:0031331;GO:0031344;GO:0031346;GO:0032268;GO:0032270;GO:0032434;GO:0032436;GO:0032446;GO:0033554;GO:…	GO:0003824;GO:0016874;GO:0016879;GO:0016881	GO:0000151;GO:0005634;GO:0031371;GO:0032991;GO:0035370;GO:0043226;GO:0043227;GO:0043229;GO:0043231;GO:0043234;GO:0044424;GO:0044464	GO:0006139;GO:0006259;GO:0006281;GO:0006464;GO:0006807;GO:0006950;GO:0006974;GO:0008152;GO:0009987;GO:0019538;GO:0034641;GO:0043170;GO:0043412;GO:0044237;GO:0044238;GO:0050896;GO:0051052;GO:0065007;GO:0070647	GO:0000151;GO:0005634;GO:0031371;GO:0032991;GO:0043226;GO:0043229;GO:0043231;GO:0043234;GO:0044464			2.0957e-11	864340000	-0.176225	0.754792	-0.199094	Q9CZY3;B7ZBY7;E9PY39;B7ZBY6;A6X925;D3YXL3;D3Z6R2;D3Z1I3	Q9CZY3;B7ZBY7;E9PY39;B7ZBY6	Ubiquitin-conjugating enzyme E2 variant 1	Ube2v1;Gm20431
26.654	26.4986	26.8618	26.6788	26.6185	26.2822	26.6241	27.0937	26.7822	26.5939	26.8997	26.7335				anatomical structure development;blastocyst development;catabolic process;developmental process;macromolecule catabolic process;macromolecule metabolic process;metabolic process;primary metabolic process;protein catabolic process;protein metabolic process	adenyl nucleotide binding;adenyl ribonucleotide binding;ATP binding;binding;catalytic activity;hydrolase activity;hydrolase activity, acting on acid anhydrides;hydrolase activity, acting on acid anhydrides, in phosphorus-containing anhydrides;nucleoside-triphosphatase activity;nucleotide binding;purine nucleotide binding;purine ribonucleoside triphosphate binding;purine ribonucleotide binding;pyr…	cell part;cytoplasm;cytoplasmic mRNA processing body;cytoplasmic part;intracellular membrane-bounded organelle;intracellular non-membrane-bounded organelle;intracellular organelle;intracellular part;macromolecular complex;membrane-bounded organelle;non-membrane-bounded organelle;nucleus;organelle;perinuclear region of cytoplasm;proteasome accessory complex;protein complex;ribonucleoprotein comple…	anatomical structure development;catabolic process;developmental process;macromolecule metabolic process;metabolic process;primary metabolic process;protein catabolic process;protein metabolic process	cell part;cytoplasm;intracellular membrane-bounded organelle;intracellular non-membrane-bounded organelle;intracellular organelle;macromolecular complex;nucleus;organelle;protein complex;ribonucleoprotein complex	Proteasome	AAA	BIOCARTA_PROTEASOME_PATHWAY;CASORELLI_ACUTE_PROMYELOCYTIC_LEUKEMIA_DN;CHANG_CORE_SERUM_RESPONSE_UP;CHIANG_LIVER_CANCER_SUBCLASS_UNANNOTATED_DN;chr11p11;CSR_LATE_UP.V1_UP;DACOSTA_UV_RESPONSE_VIA_ERCC3_UP;DELASERNA_MYOD_TARGETS_UP;DIAZ_CHRONIC_MEYLOGENOUS_LEUKEMIA_UP;GARY_CD5_TARGETS_DN;GCM_CSNK2B;GGGCGGR_V$SP1_Q6;GSE10856_CTRL_VS_TNFRSF6B_IN_MACROPHAGE_DN;GSE11864_CSF1_IFNG_VS_CSF1_IFNG_PAM3CYS_IN…	ATP-binding;Completeproteome;Cytoplasm;Nucleotide-binding;Nucleus;Phosphoprotein;Proteasome;Referenceproteome		GO:0001824;GO:0008152;GO:0009056;GO:0009057;GO:0019538;GO:0030163;GO:0032502;GO:0043170;GO:0044238;GO:0048856	GO:0000166;GO:0003824;GO:0005488;GO:0005524;GO:0016462;GO:0016787;GO:0016817;GO:0016818;GO:0017076;GO:0017111;GO:0030554;GO:0032553;GO:0032555;GO:0032559;GO:0035639	GO:0000932;GO:0005634;GO:0005737;GO:0022624;GO:0030529;GO:0032991;GO:0035770;GO:0043226;GO:0043227;GO:0043228;GO:0043229;GO:0043231;GO:0043232;GO:0043234;GO:0044424;GO:0044444;GO:0044464;GO:0048471	GO:0008152;GO:0009056;GO:0019538;GO:0030163;GO:0032502;GO:0043170;GO:0044238;GO:0048856	GO:0005634;GO:0005737;GO:0030529;GO:0032991;GO:0043226;GO:0043229;GO:0043231;GO:0043232;GO:0043234;GO:0044464			2.3027e-26	864940000	-0.0829237	0.219277	-0.0977139	O88685;B7ZCF1;A2AGN7;F6Q2E3	O88685;B7ZCF1;A2AGN7	26S protease regulatory subunit 6A	Psmc3
28.7649	28.3438	28.5314	28.3459	28.5899	28.2841	28.202	28.0614	28.6096	28.2042	27.6486	28.1157				biological regulation;regulation of behavior;regulation of biological process;regulation of cell migration;regulation of cell motility;regulation of cellular component movement;regulation of cellular process;regulation of chemotaxis;regulation of immune system process;regulation of leukocyte chemotaxis;regulation of leukocyte migration;regulation of localization;regulation of locomotion;regulatio…		cell cortex part;cell part;cell projection;cortical cytoskeleton;cytoplasmic part;cytoskeleton;intracellular non-membrane-bounded organelle;intracellular organelle;intracellular part;membrane;microvillus;non-membrane-bounded organelle;organelle;organelle part;stereocilium	biological regulation	cell part;cell projection;cytoskeleton;intracellular non-membrane-bounded organelle;intracellular organelle;membrane;microvillus;organelle		Guanylate_kin;PDZ;SH3_1;SH3_2	ACEVEDO_LIVER_CANCER_WITH_H3K27ME3_UP;ACOSTA_PROLIFERATION_INDEPENDENT_MYC_TARGETS_DN;BLALOCK_ALZHEIMERS_DISEASE_DN;BYSTRYKH_HEMATOPOIESIS_STEM_CELL_QTL_TRANS;CELL_FRACTION;CHARAFE_BREAST_CANCER_LUMINAL_VS_MESENCHYMAL_DN;chrxq28;DEURIG_T_CELL_PROLYMPHOCYTIC_LEUKEMIA_UP;DIAZ_CHRONIC_MEYLOGENOUS_LEUKEMIA_UP;DOANE_RESPONSE_TO_ANDROGEN_DN;DOUGLAS_BMI1_TARGETS_UP;FORTSCHEGGER_PHF8_TARGETS_DN;FULCHER_I…	Cellprojection;Completeproteome;Lipoprotein;Membrane;Palmitate;Phosphoprotein;Referenceproteome;SH3domain		GO:0002682;GO:0002685;GO:0002688;GO:0030334;GO:0032101;GO:0032879;GO:0040012;GO:0048583;GO:0050789;GO:0050794;GO:0050795;GO:0050920;GO:0051270;GO:0065007;GO:0090022;GO:2000145		GO:0005856;GO:0005902;GO:0016020;GO:0030863;GO:0032420;GO:0042995;GO:0043226;GO:0043228;GO:0043229;GO:0043232;GO:0044422;GO:0044424;GO:0044444;GO:0044448;GO:0044464	GO:0065007	GO:0005856;GO:0005902;GO:0016020;GO:0042995;GO:0043226;GO:0043229;GO:0043232;GO:0044464			9.8417e-102	2884300000	0.114004	0.251899	0.139842	B7ZCL8;P70290;A2AN84;B7ZCL9;B7ZCM0;B7ZCM1;D6RFD5	B7ZCL8;P70290;A2AN84;B7ZCL9	55 kDa erythrocyte membrane protein	Mpp1
24.3717	24.3591	24.5519	24.9663	24.7568	24.5042	24.6733	24.7025	24.4302	24.5318	24.8347	25.0177				anatomical structure formation involved in morphogenesis;biological regulation;blastocyst formation;carbohydrate homeostasis;cellular chemical homeostasis;cellular glucose homeostasis;cellular homeostasis;cellular process;cellular response to carbohydrate stimulus;cellular response to chemical stimulus;cellular response to glucose stimulus;cellular response to hexose stimulus;cellular response to…		adherens junction;anchoring junction;apical plasma membrane;apicolateral plasma membrane;basolateral plasma membrane;cell junction;cell part;cell surface;cell-cell adherens junction;cell-cell contact zone;cell-cell junction;contractile fiber part;cytoplasm;cytoplasmic part;gap junction;I band;intercalated disc;intercellular canaliculus;intracellular membrane-bounded organelle;intracellular organe…	anatomical structure formation involved in morphogenesis;biological regulation;cellular homeostasis;cellular process;circulatory system process;developmental process;homeostatic process;multicellular organismal process;response to abiotic stimulus;response to biotic stimulus;response to chemical stimulus;response to drug;response to stimulus	cell part;cell surface;cytoplasm;intracellular membrane-bounded organelle;intracellular organelle;nucleus;organelle	Adherens junction;Epithelial cell signaling in Helicobacter pylori infection;Gap junction;Tight junction;Vibrio cholerae infection	Guanylate_kin;PDZ;SH3_2;ZU5	AAAYWAACM_V$HFH4_01;ACCTGTTG_UNKNOWN;ACEVEDO_LIVER_CANCER_UP;AMIT_SERUM_RESPONSE_240_MCF10A;AMUNDSON_POOR_SURVIVAL_AFTER_GAMMA_RADIATION_2G;APICAL_JUNCTION_COMPLEX;APICOLATERAL_PLASMA_MEMBRANE;ATGTACA,MIR-493;BAE_BRCA1_TARGETS_DN;BASOLATERAL_PLASMA_MEMBRANE;BROWNE_HCMV_INFECTION_14HR_DN;BROWNE_HCMV_INFECTION_30MIN_DN;BROWNE_HCMV_INFECTION_48HR_DN;BRUNO_HEMATOPOIESIS;BUYTAERT_PHOTODYNAMIC_THERAPY_…	3D-structure;Calmodulin-binding;Celljunction;Cellmembrane;Completeproteome;Cytoplasm;Gapjunction;Membrane;Phosphoprotein;Referenceproteome;Repeat;SH3domain;Tightjunction		GO:0001678;GO:0001825;GO:0002237;GO:0003008;GO:0003013;GO:0003018;GO:0009607;GO:0009628;GO:0009743;GO:0009746;GO:0009749;GO:0009987;GO:0010033;GO:0019725;GO:0032496;GO:0032501;GO:0032502;GO:0033500;GO:0034284;GO:0042221;GO:0042493;GO:0042592;GO:0042593;GO:0043114;GO:0043116;GO:0045471;GO:0048646;GO:0048878;GO:0050896;GO:0051716;GO:0055082;GO:0065007;GO:0065008;GO:0070887;GO:0071000;GO:0071310;GO:…		GO:0005634;GO:0005737;GO:0005911;GO:0005912;GO:0005913;GO:0005921;GO:0005923;GO:0009986;GO:0014704;GO:0016323;GO:0016324;GO:0016327;GO:0030054;GO:0031674;GO:0043226;GO:0043227;GO:0043229;GO:0043231;GO:0044291;GO:0044422;GO:0044424;GO:0044425;GO:0044444;GO:0044449;GO:0044459;GO:0044464;GO:0046581;GO:0070160;GO:0070161	GO:0003013;GO:0009607;GO:0009628;GO:0009987;GO:0019725;GO:0032501;GO:0032502;GO:0042221;GO:0042493;GO:0042592;GO:0048646;GO:0050896;GO:0065007	GO:0005634;GO:0005737;GO:0009986;GO:0043226;GO:0043229;GO:0043231;GO:0044464			5.4467e-07	178350000	-0.0387211	0.112713	-0.0443735	B9EHJ3;P39447	B9EHJ3;P39447	Tight junction protein ZO-1	Tjp1
27.1753	26.8365	27.5745	26.1192	26.0581	25.3748	26.1258	27.0851	26.1139	25.701	25.9186	25.0988					binding;GTP binding;guanyl nucleotide binding;guanyl ribonucleotide binding;nucleotide binding;purine nucleotide binding;purine ribonucleoside triphosphate binding;purine ribonucleotide binding;ribonucleotide binding	cell part;cytoplasmic part;cytosol;intracellular membrane-bounded organelle;intracellular organelle;intracellular part;membrane-bounded organelle;nucleus;organelle		cell part;cytosol;intracellular membrane-bounded organelle;intracellular organelle;nucleus;organelle		AIG1	BOQUEST_STEM_CELL_DN;BOSCO_TH1_CYTOTOXIC_MODULE;BOYLAN_MULTIPLE_MYELOMA_C_D_DN;BOYLAN_MULTIPLE_MYELOMA_PCA1_UP;BRUINS_UVC_RESPONSE_VIA_TP53_GROUP_A;CHEN_LVAD_SUPPORT_OF_FAILING_HEART_DN;chr7q36;CUI_TCF21_TARGETS_2_DN;FARMER_BREAST_CANCER_CLUSTER_1;GARGALOVIC_RESPONSE_TO_OXIDIZED_PHOSPHOLIPIDS_LIGHTYELLOW_DN;GNF2_CASP8;GREENBAUM_E2A_TARGETS_DN;GSE10094_LCMV_VS_LISTERIA_IND_EFF_CD4_TCELL_UP;GSE1023…	Completeproteome;Cytoplasm;GTP-binding;Nucleotide-binding;Phosphoprotein;Referenceproteome			GO:0000166;GO:0005488;GO:0005525;GO:0017076;GO:0019001;GO:0032553;GO:0032555;GO:0032561;GO:0035639	GO:0005634;GO:0005829;GO:0043226;GO:0043227;GO:0043229;GO:0043231;GO:0044424;GO:0044444;GO:0044464		GO:0005634;GO:0005829;GO:0043226;GO:0043229;GO:0043231;GO:0044464			7.2747e-19	716550000	0.320111	0.499286	0.452872	D3YTN4;Q99JY3;D6RGS2;D3YWB5;D3Z3F3;D3Z7Q4	D3YTN4;Q99JY3	GTPase IMAP family member 4	Gimap4
28.7605	28.2169	28.7109	28.2942	28.561	29.0296	28.5276	27.7712	28.0065	28.6339	27.9513	27.4234				biosynthetic process;cell differentiation;cellular biosynthetic process;cellular component biogenesis;cellular component biogenesis at cellular level;cellular component organization or biogenesis;cellular component organization or biogenesis at cellular level;cellular developmental process;cellular macromolecule biosynthetic process;cellular macromolecule metabolic process;cellular metabolic proc…	structural constituent of ribosome;structural molecule activity	cell part;cytoplasmic part;cytosolic small ribosomal subunit;intracellular non-membrane-bounded organelle;intracellular organelle;intracellular organelle part;intracellular part;macromolecular complex;non-membrane-bounded organelle;nuclear part;nucleolus;organelle;organelle part;ribonucleoprotein complex;ribosome;small ribosomal subunit	biosynthetic process;cell differentiation;cellular metabolic process;cellular nitrogen compound metabolic process;cellular process;developmental process;establishment of localization;gas transport;macromolecule metabolic process;metabolic process;nitrogen compound metabolic process;nucleobase-containing compound metabolic process;primary metabolic process;protein metabolic process;ribosomal small…	cell part;intracellular non-membrane-bounded organelle;intracellular organelle;macromolecular complex;nucleolus;organelle;ribonucleoprotein complex;ribosome;small ribosomal subunit	Ribosome	Ribosomal_S19e	ANATOMICAL_STRUCTURE_DEVELOPMENT;ATGCTGG,MIR-338;BENPORATH_MYC_MAX_TARGETS;BENPORATH_MYC_TARGETS_WITH_EBOX;BILANGES_SERUM_AND_RAPAMYCIN_SENSITIVE_GENES;BILANGES_SERUM_RESPONSE_TRANSLATION;BILD_CTNNB1_ONCOGENIC_SIGNATURE;BILD_SRC_ONCOGENIC_SIGNATURE;BIOSYNTHETIC_PROCESS;BLALOCK_ALZHEIMERS_DISEASE_UP;BOYAULT_LIVER_CANCER_SUBCLASS_G1_UP;CACGTG_V$MYC_Q2;CASORELLI_APL_SECONDARY_VS_DE_NOVO_DN;CELLULAR_…	Acetylation;Completeproteome;Referenceproteome;Ribonucleoprotein;Ribosomalprotein		GO:0006139;GO:0006364;GO:0006396;GO:0006412;GO:0006807;GO:0006810;GO:0008152;GO:0009058;GO:0009059;GO:0009987;GO:0015669;GO:0016070;GO:0016072;GO:0019538;GO:0022613;GO:0030099;GO:0030154;GO:0030218;GO:0032502;GO:0034470;GO:0034641;GO:0034645;GO:0034660;GO:0042274;GO:0043170;GO:0044085;GO:0044237;GO:0044238;GO:0044249;GO:0044260;GO:0044267;GO:0048869;GO:0051234;GO:0071840;GO:0071841;GO:0071843;GO:…	GO:0003735;GO:0005198	GO:0005730;GO:0005840;GO:0015935;GO:0022627;GO:0030529;GO:0032991;GO:0043226;GO:0043228;GO:0043229;GO:0043232;GO:0044422;GO:0044424;GO:0044428;GO:0044444;GO:0044446;GO:0044464	GO:0006139;GO:0006364;GO:0006396;GO:0006412;GO:0006807;GO:0006810;GO:0008152;GO:0009058;GO:0009987;GO:0015669;GO:0016070;GO:0019538;GO:0030154;GO:0032502;GO:0034641;GO:0042274;GO:0043170;GO:0044237;GO:0044238;GO:0051234	GO:0005730;GO:0005840;GO:0015935;GO:0030529;GO:0032991;GO:0043226;GO:0043229;GO:0043232;GO:0044464			7.0907e-26	2608500000	0.344698	0.619672	0.468571	D3YUG3;Q9CZX8;D3Z5R8;D3Z722;S4R223	D3YUG3;Q9CZX8;D3Z5R8;D3Z722;S4R223	40S ribosomal protein S19	Rps19
30.7258	30.9099	30.8826	30.8923	30.4577	30.3319	29.9848	31.109	30.7567	30.2526	30.8078	30.5318				cellular metabolic process;cellular process;electron transport chain;generation of precursor metabolites and energy;metabolic process;oxidation-reduction process	4 iron, 4 sulfur cluster binding;binding;catalytic activity;cation binding;coenzyme binding;cofactor binding;FMN binding;ion binding;iron-sulfur cluster binding;metal cluster binding;metal ion binding;NAD binding;NADH dehydrogenase (quinone) activity;NADH dehydrogenase (ubiquinone) activity;NADH dehydrogenase activity;nucleotide binding;oxidoreductase activity;oxidoreductase activity, acting on N…	cell part;cytoplasmic part;intracellular organelle part;intracellular part;macromolecular complex;membrane;membrane part;mitochondrial inner membrane;mitochondrial membrane;mitochondrial membrane part;mitochondrial part;mitochondrial respiratory chain complex I;NADH dehydrogenase complex;organelle inner membrane;organelle membrane;organelle part;protein complex;respiratory chain complex I	cellular metabolic process;cellular process;generation of precursor metabolites and energy;metabolic process	cell part;macromolecular complex;membrane;NADH dehydrogenase complex;protein complex	Alzheimer's disease;Huntington's disease;Oxidative phosphorylation;Parkinson's disease	Complex1_51K;NADH_4Fe-4S;SLBB	BENPORATH_MYC_MAX_TARGETS;BERTUCCI_MEDULLARY_VS_DUCTAL_BREAST_CANCER_DN;BYSTRYKH_HEMATOPOIESIS_STEM_CELL_QTL_TRANS;CAMP_UP.V1_UP;CASORELLI_ACUTE_PROMYELOCYTIC_LEUKEMIA_DN;chr11q13;CYTOPLASM;CYTOPLASMIC_PART;DACOSTA_UV_RESPONSE_VIA_ERCC3_UP;ENVELOPE;GALE_APL_WITH_FLT3_MUTATED_DN;GGATTA_V$PITX2_Q2;GRADE_COLON_CANCER_UP;GSE12845_NAIVE_VS_PRE_GC_TONSIL_BCELL_DN;GSE14000_4H_VS_16H_LPS_DC_UP;GSE14308_N…	4Fe-4S;Acetylation;Completeproteome;Directproteinsequencing;Electrontransport;Flavoprotein;FMN;Iron;Iron-sulfur;Membrane;Metal-binding;Mitochondrion;Mitochondrioninnermembrane;NAD;Oxidoreductase;Referenceproteome;Respiratorychain;Transitpeptide;Transport;Ubiquinone	Respiratory chain complex I, mitochondrial	GO:0006091;GO:0008152;GO:0009987;GO:0022900;GO:0044237;GO:0055114	GO:0000166;GO:0003824;GO:0003954;GO:0005488;GO:0008137;GO:0010181;GO:0016491;GO:0016651;GO:0016655;GO:0043167;GO:0043169;GO:0046872;GO:0048037;GO:0050136;GO:0050662;GO:0051287;GO:0051536;GO:0051539;GO:0051540	GO:0005743;GO:0005747;GO:0016020;GO:0019866;GO:0030964;GO:0031090;GO:0031966;GO:0032991;GO:0043234;GO:0044422;GO:0044424;GO:0044425;GO:0044429;GO:0044444;GO:0044446;GO:0044455;GO:0044464;GO:0045271	GO:0006091;GO:0008152;GO:0009987;GO:0044237	GO:0016020;GO:0030964;GO:0032991;GO:0043234;GO:0044464			1.2335e-240	12163000000	-0.0918379	0.168638	-0.116357	D3YUM1;Q91YT0;D3Z1U9;D3Z0K1;D3YXX5;D6RG60	D3YUM1;Q91YT0;D3Z1U9	NADH dehydrogenase [ubiquinone] flavoprotein 1, mitochondrial	Ndufv1
24.1951	24.2732	25.2467	24.4566	24.3992	24.7651	24.3951	24.5003	24.5695	23.6065	24.7412	24.6081				cellular macromolecule metabolic process;cellular metabolic process;cellular process;cellular protein metabolic process;cullin deneddylation;macromolecule metabolic process;macromolecule modification;metabolic process;primary metabolic process;protein deneddylation;protein metabolic process;protein modification by small protein conjugation or removal;protein modification by small protein removal;…		cell part;cytoplasm;intracellular organelle part;intracellular part;macromolecular complex;nuclear part;organelle part;protein complex;signalosome	cellular metabolic process;cellular process;macromolecule metabolic process;macromolecule modification;metabolic process;primary metabolic process;protein metabolic process;protein modification by small protein conjugation or removal;protein modification process	cell part;cytoplasm;macromolecular complex;protein complex		PCI	ACEVEDO_LIVER_CANCER_UP;BARRIER_CANCER_RELAPSE_TUMOR_SAMPLE_UP;BLALOCK_ALZHEIMERS_DISEASE_DN;BRUINS_UVC_RESPONSE_LATE;chr4q21;DAIRKEE_TERT_TARGETS_UP;DIAZ_CHRONIC_MEYLOGENOUS_LEUKEMIA_UP;DODD_NASOPHARYNGEAL_CARCINOMA_UP;GATTGGY_V$NFY_Q6_01;GCATTTG,MIR-105;GGGCGGR_V$SP1_Q6;GSE10239_NAIVE_VS_KLRG1INT_EFF_CD8_TCELL_DN;GSE10325_CD4_TCELL_VS_LUPUS_CD4_TCELL_DN;GSE13485_DAY1_VS_DAY21_YF17D_VACCINE_PBMC…	3D-structure;Acetylation;Completeproteome;Cytoplasm;Directproteinsequencing;Nucleus;Referenceproteome;Signalosome	COP9 signalosome complex (Gps1, Cops1, Cops2, Cops3, Cops4, Cops5, Cops6, Cops7a, Cops7b, Cops8)	GO:0000338;GO:0006464;GO:0008152;GO:0009987;GO:0010388;GO:0019538;GO:0043170;GO:0043412;GO:0044237;GO:0044238;GO:0044260;GO:0044267;GO:0070646;GO:0070647		GO:0005737;GO:0008180;GO:0032991;GO:0043234;GO:0044422;GO:0044424;GO:0044428;GO:0044446;GO:0044464	GO:0006464;GO:0008152;GO:0009987;GO:0019538;GO:0043170;GO:0043412;GO:0044237;GO:0044238;GO:0070647	GO:0005737;GO:0032991;GO:0043234;GO:0044464			2.7887e-07	151730000	0.104795	0.190936	0.133611	D3Z1R9;D3YV99;F6QTS1;O88544	D3Z1R9;D3YV99;F6QTS1;O88544	COP9 signalosome complex subunit 4	Cops4
25.4539	26.5225	26.0696	24.6162	26.5647	26.9468	26.352	26.3825	26.4952	26.5158	26.5279	26.0366					binding;calcium ion binding;calcium-dependent cysteine-type endopeptidase activity;catalytic activity;cation binding;cysteine-type endopeptidase activity;cysteine-type peptidase activity;endopeptidase activity;hydrolase activity;ion binding;metal ion binding;peptidase activity;peptidase activity, acting on L-amino acid peptides	cell part;cytoplasm;intracellular part;membrane;plasma membrane		cell part;cytoplasm;membrane;plasma membrane		EF_hand_4	BIOCARTA_INTEGRIN_PATHWAY;BIOCARTA_MCALPAIN_PATHWAY;BIOCARTA_MEF2D_PATHWAY;BIOCARTA_P35ALZHEIMERS_PATHWAY;BIOCARTA_UCALPAIN_PATHWAY;BLALOCK_ALZHEIMERS_DISEASE_DN;BROWNE_HCMV_INFECTION_48HR_DN;CELL_PROLIFERATION_GO_0008283;CHAUHAN_RESPONSE_TO_METHOXYESTRADIOL_DN;chr19q13;CYSTEINE_TYPE_ENDOPEPTIDASE_ACTIVITY;CYSTEINE_TYPE_PEPTIDASE_ACTIVITY;DAZARD_RESPONSE_TO_UV_NHEK_UP;DAZARD_UV_RESPONSE_CLUSTER_G…	Acetylation;Calcium;Cellmembrane;Completeproteome;Cytoplasm;Membrane;Metal-binding;Referenceproteome;Repeat			GO:0003824;GO:0004175;GO:0004197;GO:0004198;GO:0005488;GO:0005509;GO:0008233;GO:0008234;GO:0016787;GO:0043167;GO:0043169;GO:0046872;GO:0070011	GO:0005737;GO:0005886;GO:0016020;GO:0044424;GO:0044464		GO:0005737;GO:0005886;GO:0016020;GO:0044464			3.6256e-10	551410000	0.141846	0.407417	0.167586	D3YW48;O88456	D3YW48;O88456	Calpain small subunit 1	Capns1
25.3036	25.5565	25.1282	25.5908	25.1296	25.251	25.2787	25.0359	26.9761	25.6798	25.8208	27.3738					endopeptidase inhibitor activity;endopeptidase regulator activity;enzyme inhibitor activity;enzyme regulator activity;peptidase inhibitor activity;peptidase regulator activity;serine-type endopeptidase inhibitor activity	extracellular region;extracellular region part;extracellular space		extracellular region;extracellular space		A2M;A2M_comp;A2M_N;A2M_N_2;A2M_recep;Thiol-ester_cl	ABE_VEGFA_TARGETS;ABRAHAM_ALPC_VS_MULTIPLE_MYELOMA_UP;ACEVEDO_LIVER_CANCER_DN;ACEVEDO_LIVER_TUMOR_VS_NORMAL_ADJACENT_TISSUE_DN;ACEVEDO_NORMAL_TISSUE_ADJACENT_TO_LIVER_TUMOR_UP;ATF2_S_UP.V1_DN;BANDRES_RESPONSE_TO_CARMUSTIN_MGMT_24HR_DN;BENPORATH_CYCLING_GENES;BENPORATH_PROLIFERATION;BLALOCK_ALZHEIMERS_DISEASE_UP;BMI1_DN_MEL18_DN.V1_DN;BOQUEST_STEM_CELL_CULTURED_VS_FRESH_UP;CAIRO_HEPATOBLASTOMA_DN;…	Baitregion;Completeproteome;Directproteinsequencing;Disulfidebond;Glycoprotein;Phosphoprotein;Proteaseinhibitor;Referenceproteome;Secreted;Serineproteaseinhibitor;Signal;Thioesterbond			GO:0004857;GO:0004866;GO:0004867;GO:0030234;GO:0030414;GO:0061134;GO:0061135	GO:0005576;GO:0005615;GO:0044421		GO:0005576;GO:0005615	+	+	1.3164e-14	456450000	-0.905143	1.64214	-1.28886	Q61838;D3YW52	Q61838;D3YW52	Alpha-2-macroglobulin;Alpha-2-macroglobulin 165 kDa subunit;Alpha-2-macroglobulin 35 kDa subunit	A2m;Pzp
26.111	26.3112	26.2445	26.8713	26.6355	26.6048	26.3749	25.8974	26.4687	26.4454	26.6067	26.8441				biological regulation;cellular macromolecule metabolic process;cellular metabolic process;cellular nitrogen compound metabolic process;cellular process;cellular protein metabolic process;cellular response to stimulus;cellular response to stress;DNA metabolic process;DNA repair;macromolecule metabolic process;macromolecule modification;metabolic process;negative regulation of biological process;ne…	binding;catalytic activity;cysteine-type peptidase activity;exopeptidase activity;hydrolase activity;NEDD8-specific protease activity;omega peptidase activity;peptidase activity;peptidase activity, acting on L-amino acid peptides;protein binding;small conjugating protein binding;small conjugating protein-specific protease activity;ubiquitin binding;ubiquitin-specific protease activity	cell part;cytoplasm;intracellular part	biological regulation;cellular metabolic process;cellular nitrogen compound metabolic process;cellular process;DNA metabolic process;DNA repair;macromolecule metabolic process;macromolecule modification;metabolic process;nitrogen compound metabolic process;nucleobase-containing compound metabolic process;primary metabolic process;protein metabolic process;protein modification by small protein con…	cell part;cytoplasm		Peptidase_C65	AACTTT_UNKNOWN;AATGTGA,MIR-23A,MIR-23B;AGCTCCT,MIR-28;ATGTACA,MIR-493;BENPORATH_NANOG_TARGETS;BONOME_OVARIAN_CANCER_SURVIVAL_SUBOPTIMAL_DEBULKING;BYSTRYKH_HEMATOPOIESIS_STEM_CELL_AND_BRAIN_QTL_TRANS;chr11q13;GGGAGGRR_V$MAZ_Q6;GGGCGGR_V$SP1_Q6;GSE17580_TREG_VS_TEFF_UP;GSE17721_CTRL_VS_CPG_0.5H_BMDM_DN;GSE17721_PAM3CSK4_VS_CPG_4H_BMDM_DN;GSE17721_PAM3CSK4_VS_CPG_8H_BMDM_DN;GSE17721_POLYIC_VS_CPG_4H…	Adaptiveimmunity;Completeproteome;Cytoplasm;Directproteinsequencing;DNAdamage;DNArepair;Hydrolase;Immunity;Phosphoprotein;Protease;Referenceproteome;Thiolprotease;Ublconjugationpathway		GO:0006139;GO:0006259;GO:0006281;GO:0006282;GO:0006464;GO:0006508;GO:0006807;GO:0006950;GO:0006974;GO:0008152;GO:0009892;GO:0009987;GO:0010605;GO:0016579;GO:0019219;GO:0019222;GO:0019538;GO:0031323;GO:0031324;GO:0033554;GO:0034641;GO:0043170;GO:0043412;GO:0044237;GO:0044238;GO:0044260;GO:0044267;GO:0045738;GO:0045934;GO:0048519;GO:0048523;GO:0048583;GO:0048585;GO:0050789;GO:0050794;GO:0050896;GO:…	GO:0003824;GO:0004843;GO:0005488;GO:0005515;GO:0008233;GO:0008234;GO:0008238;GO:0008242;GO:0016787;GO:0019783;GO:0019784;GO:0032182;GO:0043130;GO:0070011	GO:0005737;GO:0044424;GO:0044464	GO:0006139;GO:0006259;GO:0006281;GO:0006464;GO:0006508;GO:0006807;GO:0006950;GO:0006974;GO:0008152;GO:0009987;GO:0019538;GO:0034641;GO:0043170;GO:0043412;GO:0044237;GO:0044238;GO:0050896;GO:0051052;GO:0065007;GO:0070647	GO:0005737;GO:0044464			2.2226e-44	705410000	-0.178518	0.504473	-0.213055	D3YWF6;Q7TQI3;D3Z7K0	D3YWF6;Q7TQI3;D3Z7K0	Ubiquitin thioesterase OTUB1	Otub1
29.6136	29.9435	29.8957	29.7398	29.4651	29.6422	29.5518	29.3339	29.3206	29.2314	29.2684	29.2555				amine catabolic process;amine metabolic process;anatomical structure development;aromatic amino acid family catabolic process;aromatic amino acid family metabolic process;aromatic compound biosynthetic process;aromatic compound catabolic process;biosynthetic process;carboxylic acid catabolic process;carboxylic acid metabolic process;catabolic process;cellular amine metabolic process;cellular amin…	6,7-dihydropteridine reductase activity;binding;catalytic activity;coenzyme binding;cofactor binding;NAD binding;NADH binding;NADP binding;NADPH binding;nucleotide binding;oxidoreductase activity;oxidoreductase activity, acting on the CH-NH group of donors;oxidoreductase activity, acting on the CH-NH group of donors, NAD or NADP as acceptor	cell part;cell projection;cytoplasmic part;cytosol;intracellular membrane-bounded organelle;intracellular organelle;intracellular part;membrane-bounded organelle;mitochondrion;neuron projection;organelle	amine metabolic process;anatomical structure development;biosynthetic process;catabolic process;cellular amino acid metabolic process;cellular aromatic compound metabolic process;cellular ketone metabolic process;cellular metabolic process;cellular nitrogen compound metabolic process;cellular process;cofactor metabolic process;developmental process;heterocycle metabolic process;metabolic process;…	cell part;cell projection;cytosol;intracellular membrane-bounded organelle;intracellular organelle;mitochondrion;neuron projection;organelle	Folate biosynthesis	adh_short	ALFANO_MYC_TARGETS;AMINE_METABOLIC_PROCESS;AMINO_ACID_AND_DERIVATIVE_METABOLIC_PROCESS;AMINO_ACID_METABOLIC_PROCESS;AROMATIC_COMPOUND_METABOLIC_PROCESS;BENPORATH_MYC_TARGETS_WITH_EBOX;BOYAULT_LIVER_CANCER_SUBCLASS_G12_DN;BURTON_ADIPOGENESIS_6;CARBOXYLIC_ACID_METABOLIC_PROCESS;chr4p15;CYTOPLASM;DAIRKEE_CANCER_PRONE_RESPONSE_BPA;DANG_BOUND_BY_MYC;DARWICHE_PAPILLOMA_RISK_HIGH_UP;DARWICHE_PAPILLOMA_R…	Completeproteome;Directproteinsequencing;NADP;Oxidoreductase;Referenceproteome;Tetrahydrobiopterinbiosynthesis		GO:0001889;GO:0006082;GO:0006520;GO:0006558;GO:0006559;GO:0006725;GO:0006729;GO:0006732;GO:0006807;GO:0008152;GO:0009056;GO:0009058;GO:0009063;GO:0009072;GO:0009074;GO:0009108;GO:0009308;GO:0009310;GO:0009719;GO:0009725;GO:0009987;GO:0010033;GO:0010035;GO:0010038;GO:0010044;GO:0010288;GO:0016054;GO:0018130;GO:0019438;GO:0019439;GO:0019752;GO:0032502;GO:0033762;GO:0034641;GO:0035690;GO:0042180;GO:…	GO:0000166;GO:0003824;GO:0004155;GO:0005488;GO:0016491;GO:0016645;GO:0016646;GO:0048037;GO:0050661;GO:0050662;GO:0051287;GO:0070402;GO:0070404	GO:0005739;GO:0005829;GO:0042995;GO:0043005;GO:0043226;GO:0043227;GO:0043229;GO:0043231;GO:0044424;GO:0044444;GO:0044464	GO:0006082;GO:0006520;GO:0006725;GO:0006807;GO:0008152;GO:0009056;GO:0009058;GO:0009308;GO:0009719;GO:0009987;GO:0032502;GO:0034641;GO:0042180;GO:0042221;GO:0042493;GO:0044237;GO:0044238;GO:0044281;GO:0046483;GO:0048856;GO:0050896;GO:0051186	GO:0005739;GO:0005829;GO:0042995;GO:0043005;GO:0043226;GO:0043229;GO:0043231;GO:0044464		+	1.2862e-201	5779200000	0.214588	1.81559	0.229243	D3YWR7;Q8BVI4;D3Z1A1;D3Z099	D3YWR7;Q8BVI4	Dihydropteridine reductase	Qdpr
23.5698	25.7998	24.4978	23.7364	24.5538	25.7912	25.4703	23.6323	25.4847	23.7227	23.437	23.7763				alcohol metabolic process;carbohydrate metabolic process;cellular carbohydrate metabolic process;cellular metabolic process;cellular process;fucose metabolic process;hexose metabolic process;metabolic process;monosaccharide metabolic process;primary metabolic process;small molecule metabolic process	binding;carbohydrate binding;catalytic activity;fucose binding;isomerase activity;monosaccharide binding;racemase and epimerase activity;racemase and epimerase activity, acting on carbohydrates and derivatives;sugar binding		alcohol metabolic process;carbohydrate metabolic process;cellular metabolic process;cellular process;metabolic process;primary metabolic process;small molecule metabolic process			RbsD_FucU		3D-structure;Alternativesplicing;Completeproteome;Isomerase;Referenceproteome		GO:0005975;GO:0005996;GO:0006004;GO:0006066;GO:0008152;GO:0009987;GO:0019318;GO:0044237;GO:0044238;GO:0044262;GO:0044281	GO:0003824;GO:0005488;GO:0005529;GO:0016853;GO:0016854;GO:0016857;GO:0030246;GO:0042806;GO:0048029		GO:0005975;GO:0006066;GO:0008152;GO:0009987;GO:0044237;GO:0044238;GO:0044281				2.1137e-06	301900000	0.452131	0.516824	0.75668	D3YWS7;Q8R2K1;F6SJM7;F6X9P4	D3YWS7;Q8R2K1;F6SJM7;F6X9P4	Fucose mutarotase	Fuom
25.8351	25.2842	25.8927	26.2467	25.6795	25.4875	25.6653	25.1822	25.892	25.9672	25.6422	25.6035				establishment of localization;transport	catalytic activity;hydrolase activity;hydrolase activity, acting on acid anhydrides;hydrolase activity, acting on acid anhydrides, in phosphorus-containing anhydrides;motor activity;nucleoside-triphosphatase activity;pyrophosphatase activity	cell leading edge;cell part;centrosome;chromosomal part;cytoplasm;cytoplasmic part;cytoskeletal part;dynein complex;intracellular non-membrane-bounded organelle;intracellular organelle;intracellular organelle part;intracellular part;kinetochore;macromolecular complex;microtubule;microtubule associated complex;microtubule organizing center;non-membrane-bounded organelle;organelle;organelle part;pr…	establishment of localization;transport	cell leading edge;cell part;centrosome;cytoplasm;intracellular non-membrane-bounded organelle;intracellular organelle;kinetochore;macromolecular complex;microtubule organizing center;organelle;protein complex	Huntington's disease;Vasopressin-regulated water reabsorption	CAP_GLY;Dynactin	BROWNE_HCMV_INFECTION_48HR_DN;CAGCTG_V$AP4_Q5;CAGGTA_V$AREB6_01;CAGGTG_V$E12_Q6;chr2p13;CTCAGGG,MIR-125B,MIR-125A;CYTAGCAAY_UNKNOWN;CYTOPLASM;CYTOSKELETAL_PART;CYTOSKELETON;DARWICHE_PAPILLOMA_RISK_HIGH_DN;DARWICHE_PAPILLOMA_RISK_LOW_DN;DARWICHE_SKIN_TUMOR_PROMOTER_DN;DARWICHE_SQUAMOUS_CELL_CARCINOMA_DN;DAZARD_RESPONSE_TO_UV_NHEK_UP;ENK_UV_RESPONSE_KERATINOCYTE_UP;GGGTGGRR_V$PAX4_03;GRADE_COLON_CA…	Alternativesplicing;Coiledcoil;Completeproteome;Cytoplasm;Cytoskeleton;Dynein;Microtubule;Phosphoprotein;Referenceproteome;Transport;Ublconjugation	dynein-dynactin complex;Htt-Dctn1-Hap1 complex;Lebercilin complex (Lca5, Ncl, Npm1, Ywhae, HSPA1A/B, Dctn1, Dctn2)	GO:0006810;GO:0051234	GO:0003774;GO:0003824;GO:0016462;GO:0016787;GO:0016817;GO:0016818;GO:0017111	GO:0000776;GO:0000922;GO:0005737;GO:0005813;GO:0005815;GO:0005874;GO:0005875;GO:0030286;GO:0031252;GO:0032991;GO:0043226;GO:0043228;GO:0043229;GO:0043232;GO:0043234;GO:0044422;GO:0044424;GO:0044427;GO:0044430;GO:0044444;GO:0044446;GO:0044464	GO:0006810;GO:0051234	GO:0000776;GO:0005737;GO:0005813;GO:0005815;GO:0031252;GO:0032991;GO:0043226;GO:0043229;GO:0043232;GO:0043234;GO:0044464			1.6004e-21	365150000	-0.237754	0.948908	-0.272635	D3YX34;E9Q586;E9Q3M3;O08788	D3YX34;E9Q586;E9Q3M3;O08788	Dynactin subunit 1	Dctn1
26.6136	26.9608	27.0389	26.9006	27.0454	26.9863	26.968	26.9276	27.0908	26.8787	26.74	27.0129				biological regulation;cellular component organization;cellular component organization or biogenesis;positive regulation of actin filament polymerization;positive regulation of biological process;positive regulation of cellular component organization;positive regulation of cellular process;positive regulation of cytoskeleton organization;positive regulation of organelle organization;positive regul…		adherens junction;anchoring junction;Arp2/3 protein complex;cell junction;cell leading edge;cell part;cell projection;cell-substrate adherens junction;cell-substrate junction;cytoplasmic part;cytoskeletal part;endosome;focal adhesion;Golgi apparatus;intracellular membrane-bounded organelle;intracellular organelle;intracellular organelle part;intracellular part;macromolecular complex;membrane;memb…	biological regulation;cellular component organization;regulation of organelle organization	cell leading edge;cell part;cell projection;endosome;Golgi apparatus;intracellular membrane-bounded organelle;intracellular organelle;macromolecular complex;membrane;organelle;plasma membrane;protein complex	Bacterial invasion of epithelial cells;Fc gamma R-mediated phagocytosis;Pathogenic Escherichia coli infection;Regulation of actin cytoskeleton;Shigellosis	P34-Arc	AAAYRNCTG_UNKNOWN;AACTTT_UNKNOWN;ACTIN_CYTOSKELETON;BANDRES_RESPONSE_TO_CARMUSTIN_MGMT_24HR_DN;BANDRES_RESPONSE_TO_CARMUSTIN_MGMT_48HR_DN;BCAT_BILD_ET_AL_DN;BIOCARTA_ACTINY_PATHWAY;BIOCARTA_CDC42RAC_PATHWAY;BIOCARTA_MPR_PATHWAY;BIOCARTA_RHO_PATHWAY;BIOCARTA_SALMONELLA_PATHWAY;BLALOCK_ALZHEIMERS_DISEASE_DN;BONOME_OVARIAN_CANCER_SURVIVAL_OPTIMAL_DEBULKING;CHARAFE_BREAST_CANCER_LUMINAL_VS_BASAL_DN;C…	Acetylation;Actin-binding;Cellprojection;Completeproteome;Cytoplasm;Cytoskeleton;Directproteinsequencing;Referenceproteome		GO:0008064;GO:0010638;GO:0016043;GO:0030832;GO:0030833;GO:0030838;GO:0031334;GO:0032271;GO:0032273;GO:0032535;GO:0032956;GO:0032970;GO:0033043;GO:0043254;GO:0044087;GO:0048518;GO:0048522;GO:0050789;GO:0050794;GO:0051128;GO:0051130;GO:0051493;GO:0051495;GO:0065007;GO:0065008;GO:0071840;GO:0090066		GO:0005768;GO:0005794;GO:0005885;GO:0005886;GO:0005912;GO:0005924;GO:0005925;GO:0016020;GO:0030054;GO:0030055;GO:0031252;GO:0032991;GO:0042995;GO:0043226;GO:0043227;GO:0043229;GO:0043231;GO:0043234;GO:0044422;GO:0044424;GO:0044430;GO:0044444;GO:0044446;GO:0044464;GO:0070161	GO:0016043;GO:0033043;GO:0065007	GO:0005768;GO:0005794;GO:0005886;GO:0016020;GO:0031252;GO:0032991;GO:0042995;GO:0043226;GO:0043229;GO:0043231;GO:0043234;GO:0044464			1.6924e-13	930200000	0.0474109	0.259533	0.05125	D3YXG6;Q9CVB6	D3YXG6;Q9CVB6	Actin-related protein 2/3 complex subunit 2	Arpc2
27.1737	26.9519	27.022	27.3172	27.3457	27.174	27.2658	26.8042	27.0597	27.1059	26.6092	26.8622				cellular process;establishment of localization;establishment of localization in cell;establishment of protein localization;Golgi to vacuole transport;Golgi vesicle transport;intracellular transport;post-Golgi vesicle-mediated transport;protein transport;transport;vacuolar transport;vesicle-mediated transport	binding;catalytic activity;cation binding;hydrolase activity;hydrolase activity, acting on ester bonds;ion binding;metal ion binding;phosphatase activity;phosphoric ester hydrolase activity;phosphoserine phosphatase activity	cell part;cytoplasmic part;endosomal part;endosome;endosome membrane;intracellular membrane-bounded organelle;intracellular organelle;intracellular organelle part;intracellular part;membrane;membrane-bounded organelle;organelle;organelle membrane;organelle part	cellular process;establishment of localization;Golgi vesicle transport;protein transport;transport;vacuolar transport;vesicle-mediated transport	cell part;endosome;intracellular membrane-bounded organelle;intracellular organelle;membrane;organelle		Metallophos_2	ACEVEDO_LIVER_TUMOR_VS_NORMAL_ADJACENT_TISSUE_UP;BENPORATH_MYC_MAX_TARGETS;BOUDOUKHA_BOUND_BY_IGF2BP2;chr12q24;CYTOPLASM;CYTOPLASMIC_PART;DANG_BOUND_BY_MYC;ENDOSOME;GGGCGGR_V$SP1_Q6;GSE11924_TFH_VS_TH1_CD4_TCELL_DN;GSE11924_TFH_VS_TH17_CD4_TCELL_DN;GSE11924_TFH_VS_TH2_CD4_TCELL_DN;GSE15930_NAIVE_VS_48H_IN_VITRO_STIM_IL12_CD8_TCELL_DN;GSE17721_0.5H_VS_24H_GARDIQUIMOD_BMDM_UP;GSE17721_0.5H_VS_8H_GA…	3D-structure;Acetylation;Alternativesplicing;Completeproteome;Cytoplasm;Directproteinsequencing;Endosome;Hydrolase;Membrane;Metal-binding;Proteintransport;Referenceproteome;Transport;Zinc	Pigr-Vps35-Vps26a-Vps29 complex;Vps29-Vps35-Vps26a complex	GO:0006810;GO:0006892;GO:0006896;GO:0007034;GO:0009987;GO:0015031;GO:0016192;GO:0045184;GO:0046907;GO:0048193;GO:0051234;GO:0051649	GO:0003824;GO:0004647;GO:0005488;GO:0016787;GO:0016788;GO:0016791;GO:0042578;GO:0043167;GO:0043169;GO:0046872	GO:0005768;GO:0010008;GO:0016020;GO:0031090;GO:0043226;GO:0043227;GO:0043229;GO:0043231;GO:0044422;GO:0044424;GO:0044440;GO:0044444;GO:0044446;GO:0044464	GO:0006810;GO:0007034;GO:0009987;GO:0015031;GO:0016192;GO:0048193;GO:0051234	GO:0005768;GO:0016020;GO:0043226;GO:0043229;GO:0043231;GO:0044464			7.6797e-29	1055700000	0.204481	0.702767	0.238153	D3YYD5;D3Z645;Q9QZ88;D3YW98	D3YYD5;D3Z645;Q9QZ88	Vacuolar protein sorting-associated protein 29	Vps29
28.0576	28.2812	27.8412	28.1411	27.6296	27.6694	27.6087	28.4199	27.5098	28.2544	28.7381	27.8372				biological regulation;biosynthetic process;cellular biosynthetic process;cellular macromolecule biosynthetic process;cellular macromolecule metabolic process;cellular metabolic process;cellular nitrogen compound metabolic process;cellular process;macromolecule biosynthetic process;macromolecule metabolic process;metabolic process;nitrogen compound metabolic process;nucleic acid metabolic process;…		cell part;cytoplasmic part;endoplasmic reticulum;intracellular membrane-bounded organelle;intracellular organelle;intracellular organelle part;intracellular part;membrane-bounded organelle;nuclear matrix;nuclear part;organelle;organelle part;perinuclear region of cytoplasm	biological regulation;biosynthetic process;cellular metabolic process;cellular nitrogen compound metabolic process;cellular process;macromolecule metabolic process;metabolic process;nitrogen compound metabolic process;nucleobase-containing compound metabolic process;primary metabolic process;RNA metabolic process	cell part;endoplasmic reticulum;intracellular membrane-bounded organelle;intracellular organelle;organelle		LRR_4	AACTTT_UNKNOWN;AMUNDSON_POOR_SURVIVAL_AFTER_GAMMA_RADIATION_2G;BENPORATH_NANOG_TARGETS;BENPORATH_SOX2_TARGETS;BERNARD_PPAPDC1B_TARGETS_UP;BIOCARTA_SET_PATHWAY;BLUM_RESPONSE_TO_SALIRASIB_DN;BROWNE_HCMV_INFECTION_10HR_DN;BUYTAERT_PHOTODYNAMIC_THERAPY_STRESS_DN;BYSTRYKH_HEMATOPOIESIS_STEM_CELL_AND_BRAIN_QTL_TRANS;CAGCTG_V$AP4_Q5;CAGGTA_V$AREB6_01;CAGGTG_V$E12_Q6;CELLULAR_LOCALIZATION;CHEN_HOXA5_TARG…	3D-structure;Completeproteome;Cytoplasm;Endoplasmicreticulum;Leucine-richrepeat;Nucleus;Phosphoprotein;Referenceproteome;Repeat;Repressor;Transcription;Transcriptionregulation		GO:0006139;GO:0006351;GO:0006355;GO:0006807;GO:0008152;GO:0009058;GO:0009059;GO:0009889;GO:0009987;GO:0010468;GO:0010556;GO:0016070;GO:0019219;GO:0019222;GO:0031323;GO:0031326;GO:0032774;GO:0034641;GO:0034645;GO:0043170;GO:0044237;GO:0044238;GO:0044249;GO:0044260;GO:0050789;GO:0050794;GO:0051171;GO:0051252;GO:0060255;GO:0065007;GO:0080090;GO:0090304;GO:2000112		GO:0005783;GO:0016363;GO:0043226;GO:0043227;GO:0043229;GO:0043231;GO:0044422;GO:0044424;GO:0044428;GO:0044444;GO:0044446;GO:0044464;GO:0048471	GO:0006139;GO:0006807;GO:0008152;GO:0009058;GO:0009987;GO:0016070;GO:0034641;GO:0043170;GO:0044237;GO:0044238;GO:0065007	GO:0005783;GO:0043226;GO:0043229;GO:0043231;GO:0044464			1.997e-99	1924500000	-0.190177	0.325236	-0.25302	D3YYE1;D3Z7M9;O35381;F6UFG6;Q64G17;E9Q148	D3YYE1;D3Z7M9;O35381;F6UFG6	Acidic leucine-rich nuclear phosphoprotein 32 family member A	Anp32a
27.6321	27.4118	27.6451	27.3485	27.6427	27.3701	27.4685	27.8578	27.2619	28.2651	27.3192	27.5611				biological regulation;biosynthetic process;cellular biosynthetic process;cellular macromolecule biosynthetic process;cellular macromolecule metabolic process;cellular metabolic process;cellular process;cellular protein metabolic process;macromolecule biosynthetic process;macromolecule metabolic process;metabolic process;posttranscriptional regulation of gene expression;primary metabolic process;p…	binding;mRNA binding;nucleic acid binding;RNA binding;structural constituent of ribosome;structural molecule activity	cell part;cytosolic small ribosomal subunit;intracellular organelle part;intracellular part;macromolecular complex;organelle part;ribonucleoprotein complex;small ribosomal subunit	biological regulation;biosynthetic process;cellular metabolic process;cellular process;macromolecule metabolic process;metabolic process;primary metabolic process;protein metabolic process;regulation of translation;translation	cell part;macromolecular complex;ribonucleoprotein complex;small ribosomal subunit	Ribosome	Ribosomal_S7	ABE_INNER_EAR;ACEVEDO_LIVER_TUMOR_VS_NORMAL_ADJACENT_TISSUE_UP;BENPORATH_MYC_MAX_TARGETS;BILANGES_SERUM_AND_RAPAMYCIN_SENSITIVE_GENES;BILANGES_SERUM_RESPONSE_TRANSLATION;BIOSYNTHETIC_PROCESS;BOHN_PRIMARY_IMMUNODEFICIENCY_SYNDROM_UP;CELLULAR_BIOSYNTHETIC_PROCESS;CELLULAR_MACROMOLECULE_METABOLIC_PROCESS;CELLULAR_PROTEIN_METABOLIC_PROCESS;chr19q13;DAIRKEE_TERT_TARGETS_UP;DANG_BOUND_BY_MYC;DANG_MYC_T…	Acetylation;Completeproteome;Referenceproteome;Ribonucleoprotein;Ribosomalprotein		GO:0006412;GO:0006417;GO:0006448;GO:0006450;GO:0008152;GO:0009058;GO:0009059;GO:0009889;GO:0009987;GO:0010468;GO:0010556;GO:0010608;GO:0019222;GO:0019538;GO:0031323;GO:0031326;GO:0032268;GO:0034645;GO:0043170;GO:0044237;GO:0044238;GO:0044249;GO:0044260;GO:0044267;GO:0050789;GO:0050794;GO:0051246;GO:0060255;GO:0065007;GO:0065008;GO:0080090;GO:2000112	GO:0003676;GO:0003723;GO:0003729;GO:0003735;GO:0005198;GO:0005488	GO:0015935;GO:0022627;GO:0030529;GO:0032991;GO:0044422;GO:0044424;GO:0044446;GO:0044464	GO:0006412;GO:0006417;GO:0008152;GO:0009058;GO:0009987;GO:0019538;GO:0043170;GO:0044237;GO:0044238;GO:0065007	GO:0015935;GO:0030529;GO:0032991;GO:0044464			9.6114e-113	1349600000	-0.0135992	0.0228894	-0.0170541	D3YYM6;Q91V55;P97461	D3YYM6;Q91V55;P97461	40S ribosomal protein S5;40S ribosomal protein S5, N-terminally processed	Rps5
26.7354	26.5407	26.8598	27.1926	26.2426	26.0438	26.2903	26.0949	26.403	25.5839	25.7018	26.4774				carboxylic acid catabolic process;carboxylic acid metabolic process;catabolic process;cellular catabolic process;cellular component assembly;cellular component organization;cellular component organization or biogenesis;cellular ketone metabolic process;cellular lipid catabolic process;cellular lipid metabolic process;cellular metabolic process;cellular process;fatty acid alpha-oxidation;fatty aci…	binding;carbon-carbon lyase activity;catalytic activity;cation binding;coenzyme binding;cofactor binding;ion binding;lyase activity;magnesium ion binding;metal ion binding;thiamine pyrophosphate binding;vitamin binding	cell part;cytoplasmic part;intracellular membrane-bounded organelle;intracellular organelle;intracellular part;membrane-bounded organelle;microbody;organelle;peroxisome	catabolic process;cellular component assembly;cellular component organization;cellular ketone metabolic process;cellular lipid metabolic process;cellular metabolic process;cellular process;lipid metabolic process;macromolecular complex assembly;metabolic process;organic acid metabolic process;primary metabolic process;protein complex assembly;small molecule metabolic process	cell part;intracellular membrane-bounded organelle;intracellular organelle;microbody;organelle;peroxisome	Peroxisome	TPP_enzyme_C;TPP_enzyme_M;TPP_enzyme_N	AFFAR_YY1_TARGETS_UP;BOCHKIS_FOXA2_TARGETS;CARBON_CARBON_LYASE_ACTIVITY;CARBOXYLIC_ACID_METABOLIC_PROCESS;CATABOLIC_PROCESS;CELLULAR_CATABOLIC_PROCESS;CELLULAR_LIPID_CATABOLIC_PROCESS;CELLULAR_LIPID_METABOLIC_PROCESS;chr3p24;COENZYME_BINDING;COFACTOR_BINDING;CYTOPLASM;CYTOPLASMIC_PART;FATTY_ACID_METABOLIC_PROCESS;FATTY_ACID_OXIDATION;GGGYGTGNY_UNKNOWN;GOBERT_OLIGODENDROCYTE_DIFFERENTIATION_DN;GSE…	Completeproteome;Lyase;Magnesium;Metal-binding;Peroxisome;Phosphoprotein;Referenceproteome;Thiaminepyrophosphate		GO:0001561;GO:0006082;GO:0006461;GO:0006629;GO:0006631;GO:0008152;GO:0009056;GO:0009062;GO:0009987;GO:0016042;GO:0016043;GO:0016054;GO:0019395;GO:0019752;GO:0022607;GO:0030258;GO:0032787;GO:0034440;GO:0042180;GO:0043436;GO:0043933;GO:0044237;GO:0044238;GO:0044242;GO:0044248;GO:0044255;GO:0044281;GO:0044282;GO:0046395;GO:0051259;GO:0055114;GO:0065003;GO:0071822;GO:0071840;GO:0072329	GO:0000287;GO:0003824;GO:0005488;GO:0016829;GO:0016830;GO:0019842;GO:0030976;GO:0043167;GO:0043169;GO:0046872;GO:0048037;GO:0050662	GO:0005777;GO:0042579;GO:0043226;GO:0043227;GO:0043229;GO:0043231;GO:0044424;GO:0044444;GO:0044464	GO:0006082;GO:0006461;GO:0006629;GO:0008152;GO:0009056;GO:0009987;GO:0016043;GO:0022607;GO:0042180;GO:0044237;GO:0044238;GO:0044255;GO:0044281;GO:0065003	GO:0005777;GO:0042579;GO:0043226;GO:0043229;GO:0043231;GO:0044464			3.05e-25	655980000	0.101984	0.210238	0.126381	D3YZ54;Q9QXE0;E9PWM4;D6RDE9;E9Q0K0;E9Q7H7;E9Q9L4	D3YZ54;Q9QXE0;E9PWM4	2-hydroxyacyl-CoA lyase 1	Hacl1
28.1073	26.7821	27.7419	27.8171	27.5251	26.4044	23.6001	27.3513	26.9737	27.6851	28.5216	23.8894				amine metabolic process;carboxylic acid metabolic process;cellular amine metabolic process;cellular amino acid metabolic process;cellular ketone metabolic process;cellular metabolic process;cellular modified amino acid metabolic process;cellular nitrogen compound metabolic process;cellular process;glutathione metabolic process;metabolic process;nitrogen compound metabolic process;organic acid met…	catalytic activity;glutathione transferase activity;transferase activity;transferase activity, transferring alkyl or aryl (other than methyl) groups		amine metabolic process;cellular amino acid metabolic process;cellular ketone metabolic process;cellular metabolic process;cellular nitrogen compound metabolic process;cellular process;metabolic process;nitrogen compound metabolic process;organic acid metabolic process;peptide metabolic process;primary metabolic process;response to chemical stimulus;response to stimulus;small molecule metabolic p…		Drug metabolism - cytochrome P450;Glutathione metabolism;Metabolism of xenobiotics by cytochrome P450	GST_C;GST_N	ACEVEDO_LIVER_TUMOR_VS_NORMAL_ADJACENT_TISSUE_UP;ACEVEDO_NORMAL_TISSUE_ADJACENT_TO_LIVER_TUMOR_DN;CHEN_METABOLIC_SYNDROM_NETWORK;chr6p12;FLECHNER_BIOPSY_KIDNEY_TRANSPLANT_REJECTED_VS_OK_DN;GAUSSMANN_MLL_AF4_FUSION_TARGETS_F_DN;GLUTATHIONE_TRANSFERASE_ACTIVITY;GRAESSMANN_APOPTOSIS_BY_DOXORUBICIN_UP;GRAESSMANN_APOPTOSIS_BY_SERUM_DEPRIVATION_DN;GRAESSMANN_RESPONSE_TO_MC_AND_DOXORUBICIN_UP;HOSHIDA_LI…	3D-structure;Completeproteome;Referenceproteome;Transferase		GO:0006082;GO:0006518;GO:0006520;GO:0006575;GO:0006749;GO:0006790;GO:0006807;GO:0008152;GO:0009308;GO:0009987;GO:0010033;GO:0019752;GO:0034641;GO:0035634;GO:0042180;GO:0042221;GO:0043436;GO:0044106;GO:0044237;GO:0044238;GO:0044281;GO:0050896	GO:0003824;GO:0004364;GO:0016740;GO:0016765		GO:0006082;GO:0006518;GO:0006520;GO:0006790;GO:0006807;GO:0008152;GO:0009308;GO:0009987;GO:0034641;GO:0042180;GO:0042221;GO:0044237;GO:0044238;GO:0044281;GO:0050896				3.7639e-84	1285600000	-0.232087	0.154337	-0.547229	D3YZV3;P10648;D3Z6A6;E9Q6L7	D3YZV3;P10648;D3Z6A6;E9Q6L7	Glutathione S-transferase;Glutathione S-transferase A2	Gsta2;Gm10639
24.7781	24.7947	24.8448	24.8639	23.6677	24.9481	23.7162	23.7488	24.6572	24.7425	24.4849	24.6509				establishment of localization;transport		cell part;cytoplasmic part;endoplasmic reticulum;endoplasmic reticulum-Golgi intermediate compartment;Golgi apparatus;integral to membrane;intracellular membrane-bounded organelle;intracellular organelle;intracellular part;intrinsic to membrane;membrane part;membrane-bounded organelle;organelle	establishment of localization;transport	cell part;endoplasmic reticulum;Golgi apparatus;intracellular membrane-bounded organelle;intracellular organelle;organelle		EMP24_GP25L	AATGTGA,MIR-23A,MIR-23B;ACEVEDO_LIVER_CANCER_UP;ACEVEDO_LIVER_TUMOR_VS_NORMAL_ADJACENT_TISSUE_UP;ATTCTTT,MIR-186;BONOME_OVARIAN_CANCER_SURVIVAL_SUBOPTIMAL_DEBULKING;BORCZUK_MALIGNANT_MESOTHELIOMA_UP;BROCKE_APOPTOSIS_REVERSED_BY_IL6;BRUINS_UVC_RESPONSE_VIA_TP53_GROUP_A;chr5q22;CREIGHTON_ENDOCRINE_THERAPY_RESISTANCE_3;DAZARD_RESPONSE_TO_UV_SCC_UP;GCM_RAB10;GOLDRATH_ANTIGEN_RESPONSE;GSE12366_GC_BCEL…	Completeproteome;Membrane;Referenceproteome;Transmembrane;Transmembranehelix		GO:0006810;GO:0051234		GO:0005783;GO:0005793;GO:0005794;GO:0016021;GO:0031224;GO:0043226;GO:0043227;GO:0043229;GO:0043231;GO:0044424;GO:0044425;GO:0044444;GO:0044464	GO:0006810;GO:0051234	GO:0005783;GO:0005794;GO:0043226;GO:0043229;GO:0043231;GO:0044464			3.6976e-05	188790000	-0.466873	1.00526	-0.61365	E9Q7G1;D3YZZ5	E9Q7G1;D3YZZ5		Tmed7
28.9154	29.2085	29.2418	29.0832	28.6223	28.7788	28.7619	28.6861	28.3014	28.081	28.9742	28.5066				acylglycerol metabolic process;adiponectin-mediated signaling pathway;biological regulation;biosynthetic process;catabolic process;cell surface receptor linked signaling pathway;cellular catabolic process;cellular lipid metabolic process;cellular metabolic process;cellular process;cellular response to chemical stimulus;cellular response to cytokine stimulus;cellular response to organic substance;…	adenyl nucleotide binding;adenyl ribonucleotide binding;ATP binding;binding;catalytic activity;fatty acid ligase activity;ligase activity;ligase activity, forming carbon-sulfur bonds;long-chain fatty acid-CoA ligase activity;nucleotide binding;purine nucleotide binding;purine ribonucleoside triphosphate binding;purine ribonucleotide binding;ribonucleotide binding	cell part;cytoplasmic part;endoplasmic reticulum;endoplasmic reticulum membrane;endoplasmic reticulum part;integral to membrane;intracellular membrane-bounded organelle;intracellular organelle;intracellular organelle part;intracellular part;intrinsic to membrane;membrane;membrane part;membrane-bounded organelle;microbody;microbody membrane;microbody part;mitochondrial membrane;mitochondrial outer…	biological regulation;biosynthetic process;catabolic process;cellular lipid metabolic process;cellular metabolic process;cellular process;glycerol ether metabolic process;lipid metabolic process;metabolic process;primary metabolic process;regulation of protein modification process;response to chemical stimulus;response to drug;response to external stimulus;response to extracellular stimulus;respo…	cell part;endoplasmic reticulum;intracellular membrane-bounded organelle;intracellular organelle;membrane;microbody;mitochondrion;organelle;plasma membrane	Adipocytokine signaling pathway;Fatty acid metabolism;Peroxisome;PPAR signaling pathway	AMP-binding	AAGCACA,MIR-218;ACEVEDO_METHYLATED_IN_LIVER_CANCER_DN;ACTGCCT,MIR-34B;AMBROSINI_FLAVOPIRIDOL_TREATMENT_TP53;ATGAAGG,MIR-205;BILANGES_RAPAMYCIN_SENSITIVE_GENES;BLALOCK_ALZHEIMERS_DISEASE_UP;BOCHKIS_FOXA2_TARGETS;BURTON_ADIPOGENESIS_5;CACTGCC,MIR-34A,MIR-34C,MIR-449;CAGTCAC,MIR-134;CAIRO_HEPATOBLASTOMA_DN;CAIRO_LIVER_DEVELOPMENT_DN;CEBALLOS_TARGETS_OF_TP53_AND_MYC_UP;CHARAFE_BREAST_CANCER_BASAL_VS_…	Acetylation;ATP-binding;Completeproteome;Directproteinsequencing;Endoplasmicreticulum;Fattyacidmetabolism;Ligase;Lipidmetabolism;Magnesium;Membrane;Microsome;Mitochondrion;Mitochondrionoutermembrane;Nucleotide-binding;Peroxisome;Phosphoprotein;Referenceproteome;Signal-anchor;Transmembrane;Transmembranehelix		GO:0001932;GO:0006629;GO:0006638;GO:0006639;GO:0006641;GO:0006662;GO:0006805;GO:0007165;GO:0007166;GO:0007584;GO:0008152;GO:0008610;GO:0009056;GO:0009058;GO:0009605;GO:0009987;GO:0009991;GO:0010033;GO:0014070;GO:0018904;GO:0019220;GO:0019221;GO:0019222;GO:0031323;GO:0031399;GO:0031667;GO:0032268;GO:0033211;GO:0033674;GO:0033993;GO:0034097;GO:0034201;GO:0042178;GO:0042221;GO:0042325;GO:0042493;GO:…	GO:0000166;GO:0003824;GO:0004467;GO:0005488;GO:0005524;GO:0015645;GO:0016874;GO:0016877;GO:0017076;GO:0030554;GO:0032553;GO:0032555;GO:0032559;GO:0035639	GO:0005739;GO:0005741;GO:0005778;GO:0005783;GO:0005789;GO:0005886;GO:0016020;GO:0016021;GO:0019867;GO:0031090;GO:0031224;GO:0031903;GO:0031966;GO:0031968;GO:0042579;GO:0043226;GO:0043227;GO:0043229;GO:0043231;GO:0044422;GO:0044424;GO:0044425;GO:0044429;GO:0044432;GO:0044438;GO:0044439;GO:0044444;GO:0044446;GO:0044464	GO:0006629;GO:0006662;GO:0006805;GO:0007165;GO:0008152;GO:0009056;GO:0009058;GO:0009605;GO:0009987;GO:0009991;GO:0031399;GO:0042221;GO:0042493;GO:0044237;GO:0044238;GO:0044255;GO:0044281;GO:0050896;GO:0065007	GO:0005739;GO:0005783;GO:0005886;GO:0016020;GO:0042579;GO:0043226;GO:0043229;GO:0043231;GO:0044464			2.0969e-84	3543500000	0.206462	0.601058	0.246482	P41216;D3Z041;D3Z457;D3YVF6;F6WNZ2	P41216;D3Z041	Long-chain-fatty-acid--CoA ligase 1	Acsl1
25.8198	25.1595	25.2848	25.8969	26.0651	25.3096	25.3194	25.1251	25.1486	25.5005	25.3474	25.2311				B cell activation;B cell differentiation;cell activation;cell differentiation;cellular developmental process;cellular process;developmental process;immune system process;leukocyte activation;leukocyte differentiation;lymphocyte activation;lymphocyte differentiation	binding;calcium ion binding;cation binding;identical protein binding;ion binding;metal ion binding;protein binding;protein dimerization activity;protein heterodimerization activity;protein homodimerization activity	cell part;cytoplasmic part;endoplasmic reticulum;intracellular membrane-bounded organelle;intracellular organelle;intracellular part;membrane-bounded organelle;organelle;perinuclear region of cytoplasm	cell activation;cell differentiation;cellular process;developmental process;immune system process	cell part;endoplasmic reticulum;intracellular membrane-bounded organelle;intracellular organelle;organelle		TPD52	ANATOMICAL_STRUCTURE_DEVELOPMENT;ANATOMICAL_STRUCTURE_MORPHOGENESIS;ATF2_S_UP.V1_DN;ATF2_UP.V1_DN;ATGCTGC,MIR-103,MIR-107;ATGTTAA,MIR-302C;B_CELL_ACTIVATION;B_CELL_DIFFERENTIATION;BASAKI_YBX1_TARGETS_DN;BLALOCK_ALZHEIMERS_DISEASE_INCIPIENT_UP;BLALOCK_ALZHEIMERS_DISEASE_UP;BOQUEST_STEM_CELL_DN;BOYAULT_LIVER_CANCER_SUBCLASS_G3_UP;BRUINS_UVC_RESPONSE_VIA_TP53_GROUP_B;CACTGCC,MIR-34A,MIR-34C,MIR-449;…	Alternativesplicing;Coiledcoil;Completeproteome;Directproteinsequencing;Phosphoprotein;Referenceproteome		GO:0001775;GO:0002376;GO:0002521;GO:0009987;GO:0030098;GO:0030154;GO:0030183;GO:0032502;GO:0042113;GO:0045321;GO:0046649;GO:0048869	GO:0005488;GO:0005509;GO:0005515;GO:0042802;GO:0042803;GO:0043167;GO:0043169;GO:0046872;GO:0046982;GO:0046983	GO:0005783;GO:0043226;GO:0043227;GO:0043229;GO:0043231;GO:0044424;GO:0044444;GO:0044464;GO:0048471	GO:0001775;GO:0002376;GO:0009987;GO:0030154;GO:0032502	GO:0005783;GO:0043226;GO:0043229;GO:0043231;GO:0044464			2.582e-19	348240000	0.121053	0.27596	0.147906	D3Z637;D3Z125;E9PUA7;D3Z7X7;Q62393;F8WHQ1;D3Z2U2	D3Z637;D3Z125;E9PUA7;D3Z7X7;Q62393;F8WHQ1;D3Z2U2	Tumor protein D52	Tpd52
26.2723	24.3428	23.6004	24.0858	25.5215	23.9684	24.0185	25.46	22.8794	24.0254	24.6598	24.1839				biosynthetic process;catabolic process;cellular biosynthetic process;cellular catabolic process;cellular metabolic process;cellular nitrogen compound biosynthetic process;cellular nitrogen compound catabolic process;cellular nitrogen compound metabolic process;cellular process;coenzyme biosynthetic process;coenzyme catabolic process;coenzyme metabolic process;cofactor biosynthetic process;cofacto…	aspartate dehydrogenase activity;binding;catalytic activity;coenzyme binding;cofactor binding;NADP binding;nucleotide binding;oxidoreductase activity;oxidoreductase activity, acting on the CH-NH2 group of donors		biosynthetic process;catabolic process;cellular metabolic process;cellular nitrogen compound metabolic process;cellular process;cofactor metabolic process;heterocycle metabolic process;metabolic process;nitrogen compound metabolic process;nucleobase-containing compound catabolic process;nucleobase-containing compound metabolic process;nucleobase-containing small molecule metabolic process;nucleot…			DUF108;NAD_binding_3	ACEVEDO_LIVER_CANCER_DN;ACEVEDO_LIVER_TUMOR_VS_NORMAL_ADJACENT_TISSUE_DN;chr19q13;GSE17721_12H_VS_24H_CPG_BMDM_UP;GSE17721_CTRL_VS_GARDIQUIMOD_1H_BMDM_DN;GSE17974_IL4_AND_ANTI_IL12_VS_UNTREATED_0.5H_ACT_CD4_TCELL_DN;GSE20715_0H_VS_6H_OZONE_TLR4_KO_LUNG_UP;GSE26495_PD1HIGH_VS_PD1LOW_CD8_TCELL_DN;GSE27786_CD4_TCELL_VS_ERYTHTROBLAST_DN;GSE28237_EARLY_VS_LATE_GC_BCELL_DN;GSE30083_SP2_VS_SP4_THYMOCYTE…	Completeproteome;Directproteinsequencing;NAD;NADP;Oxidoreductase;Pyridinenucleotidebiosynthesis;Referenceproteome		GO:0006139;GO:0006732;GO:0006733;GO:0006739;GO:0006742;GO:0006753;GO:0006807;GO:0008152;GO:0009056;GO:0009058;GO:0009108;GO:0009109;GO:0009117;GO:0009165;GO:0009166;GO:0009435;GO:0009987;GO:0018130;GO:0019359;GO:0019362;GO:0019363;GO:0019364;GO:0019637;GO:0019674;GO:0034641;GO:0034654;GO:0034655;GO:0044237;GO:0044238;GO:0044248;GO:0044249;GO:0044270;GO:0044271;GO:0044281;GO:0046434;GO:0046483;GO:…	GO:0000166;GO:0003824;GO:0005488;GO:0016491;GO:0016638;GO:0033735;GO:0048037;GO:0050661;GO:0050662		GO:0006139;GO:0006807;GO:0008152;GO:0009056;GO:0009058;GO:0009117;GO:0009987;GO:0034641;GO:0034655;GO:0044237;GO:0044238;GO:0044281;GO:0046483;GO:0051186;GO:0055086				1.8715e-20	242910000	0.511383	0.676909	0.804954	D3Z253;Q9DCQ2;F6S4J6	D3Z253;Q9DCQ2	Putative L-aspartate dehydrogenase	Aspdh
23.9309	24.6175	23.9568	24.7742	24.0196	22.532	23.2792	24.0523	23.8694	23.7287	23.6498	23.4637				biosynthetic process;cellular biosynthetic process;cellular metabolic process;cellular process;cofactor biosynthetic process;cofactor metabolic process;iron-sulfur cluster assembly;metabolic process;metallo-sulfur cluster assembly	4 iron, 4 sulfur cluster binding;binding;cation binding;ion binding;iron ion binding;iron-sulfur cluster binding;metal cluster binding;metal ion binding;transition metal ion binding	cell part;centrosome;cytoplasmic part;cytoskeletal part;cytosol;intracellular membrane-bounded organelle;intracellular non-membrane-bounded organelle;intracellular organelle;intracellular organelle part;intracellular part;membrane-bounded organelle;microtubule organizing center;mitochondrion;non-membrane-bounded organelle;nucleus;organelle;organelle part	biosynthetic process;cellular metabolic process;cellular process;cofactor metabolic process;metabolic process	cell part;centrosome;cytosol;intracellular membrane-bounded organelle;intracellular non-membrane-bounded organelle;intracellular organelle;microtubule organizing center;mitochondrion;nucleus;organelle		Nfu_N;NifU	BLALOCK_ALZHEIMERS_DISEASE_DN;BOCHKIS_FOXA2_TARGETS;BRUINS_UVC_RESPONSE_LATE;chr2p15;CREIGHTON_ENDOCRINE_THERAPY_RESISTANCE_3;GATGKMRGCG_UNKNOWN;GSE11864_CSF1_VS_CSF1_IFNG_PAM3CYS_IN_MAC_UP;GSE13411_IGM_VS_SWITCHED_MEMORY_BCELL_DN;GSE14308_TH1_VS_INDUCED_TREG_UP;GSE1432_CTRL_VS_IFNG_6H_MICROGLIA_UP;GSE14350_IL2RB_KO_VS_WT_TREG_UP;GSE15930_STIM_VS_STIM_AND_IFNAB_24H_CD8_T_CELL_UP;GSE15930_STIM_VS_…	3D-structure;Completeproteome;Cytoplasm;Mitochondrion;Referenceproteome;Transitpeptide		GO:0008152;GO:0009058;GO:0009987;GO:0016226;GO:0031163;GO:0044237;GO:0044249;GO:0051186;GO:0051188	GO:0005488;GO:0005506;GO:0043167;GO:0043169;GO:0046872;GO:0046914;GO:0051536;GO:0051539;GO:0051540	GO:0005634;GO:0005739;GO:0005813;GO:0005815;GO:0005829;GO:0043226;GO:0043227;GO:0043228;GO:0043229;GO:0043231;GO:0043232;GO:0044422;GO:0044424;GO:0044430;GO:0044444;GO:0044446;GO:0044464	GO:0008152;GO:0009058;GO:0009987;GO:0044237;GO:0051186	GO:0005634;GO:0005739;GO:0005813;GO:0005815;GO:0005829;GO:0043226;GO:0043229;GO:0043231;GO:0043232;GO:0044464			4.7521e-11	106890000	-0.151167	0.224767	-0.207111	D3Z285;Q9QZ23	D3Z285;Q9QZ23	NFU1 iron-sulfur cluster scaffold homolog, mitochondrial	Nfu1
26.9121	26.7259	26.3405	26.9033	26.7538	26.5933	26.2576	26.324	26.8272	26.606	26.3264	26.8909				anatomical structure morphogenesis;biological adhesion;biological regulation;biosynthetic process;cell adhesion;cell differentiation;cell differentiation involved in salivary gland development;cell surface receptor linked signaling pathway;cell-cell adhesion;cellular biosynthetic process;cellular developmental process;cellular macromolecule biosynthetic process;cellular macromolecule metabolic pr…		adherens junction;anchoring junction;cell junction;cell part;cell projection;cell-cell adherens junction;cell-cell junction;cytoplasm;cytoplasmic part;cytosol;intracellular membrane-bounded organelle;intracellular organelle;intracellular part;lamellipodium;membrane;membrane-bounded organelle;midbody;nucleus;organelle;plasma membrane	anatomical structure morphogenesis;biological adhesion;biological regulation;biosynthetic process;cell adhesion;cell differentiation;cellular metabolic process;cellular nitrogen compound metabolic process;cellular process;developmental process;macromolecule metabolic process;metabolic process;nitrogen compound metabolic process;nucleobase-containing compound metabolic process;primary metabolic pr…	cell part;cell projection;cytoplasm;cytosol;intracellular membrane-bounded organelle;intracellular organelle;membrane;midbody;nucleus;organelle;plasma membrane	Adherens junction;Leukocyte transendothelial migration	Arm	AACATTC,MIR-409-3P;AACTGGA,MIR-145;AACTTT_UNKNOWN;ALCALAY_AML_BY_NPM1_LOCALIZATION_UP;ALFANO_MYC_TARGETS;ATGTACA,MIR-493;BENPORATH_CYCLING_GENES;BERENJENO_TRANSFORMED_BY_RHOA_DN;BURTON_ADIPOGENESIS_9;BYSTRYKH_HEMATOPOIESIS_STEM_CELL_QTL_TRANS;CAGGTG_V$E12_Q6;CCAWYNNGAAR_UNKNOWN;CCTGTGA,MIR-513;CHIARETTI_ACUTE_LYMPHOBLASTIC_LEUKEMIA_ZAP70;chr11q12;COULOUARN_TEMPORAL_TGFB1_SIGNATURE_DN;CREIGHTON_EN…	Acetylation;Alternativesplicing;Celladhesion;Cellmembrane;Coiledcoil;Completeproteome;Cytoplasm;Membrane;Nucleus;Phosphoprotein;Referenceproteome;Repeat;Transcription;Transcriptionregulation;Wntsignalingpathway	Kif3-cadherin-catenin complex;Nephrin-cadherin complex (Nphs1, Ctnnd1, Cdh3, Cd2ap);Nephrin-cadherin complex (Nphs1, Ctnnd1, ZO-1, Cd2ap);Xin-Cdh2-Ctnnb1-Ctnnd1 complex	GO:0001738;GO:0002009;GO:0006139;GO:0006351;GO:0006355;GO:0006807;GO:0007155;GO:0007165;GO:0007166;GO:0007435;GO:0008152;GO:0009058;GO:0009059;GO:0009653;GO:0009889;GO:0009913;GO:0009966;GO:0009968;GO:0009987;GO:0010468;GO:0010556;GO:0010646;GO:0010648;GO:0016055;GO:0016070;GO:0016337;GO:0019219;GO:0019222;GO:0022610;GO:0022612;GO:0023051;GO:0023057;GO:0030111;GO:0030154;GO:0030178;GO:0030216;GO:…		GO:0005634;GO:0005737;GO:0005829;GO:0005886;GO:0005911;GO:0005912;GO:0005913;GO:0016020;GO:0030027;GO:0030054;GO:0030496;GO:0042995;GO:0043226;GO:0043227;GO:0043229;GO:0043231;GO:0044424;GO:0044444;GO:0044464;GO:0070161	GO:0006139;GO:0006807;GO:0007155;GO:0007165;GO:0008152;GO:0009058;GO:0009653;GO:0009987;GO:0016070;GO:0022610;GO:0030154;GO:0032502;GO:0034641;GO:0043170;GO:0044237;GO:0044238;GO:0050896;GO:0065007	GO:0005634;GO:0005737;GO:0005829;GO:0005886;GO:0016020;GO:0030496;GO:0042995;GO:0043226;GO:0043229;GO:0043231;GO:0044464			9.2359e-38	706170000	-0.153887	0.473848	-0.180432	E9Q986;D3Z7H6;E9Q907;E9Q905;E9Q8Z4;E9Q8Z9;D3Z2H2;E9Q901;E9Q904;G3X9V2;P30999;E9Q8Z6;E9Q8Z8;E9Q906;E9Q903;E9Q8Z5;D3Z2H7	E9Q986;D3Z7H6;E9Q907;E9Q905;E9Q8Z4;E9Q8Z9;D3Z2H2;E9Q901;E9Q904;G3X9V2;P30999;E9Q8Z6;E9Q8Z8;E9Q906;E9Q903;E9Q8Z5;D3Z2H7	Catenin delta-1	Ctnnd1
31.3423	30.8815	30.917	31.5658	31.6622	31.2605	31.4554	31.3465	31.9827	31.7903	31.28	32.1671				actin filament-based movement;actin filament-based process;actin-mediated cell contraction;actin-myosin filament sliding;anatomical structure development;biological regulation;brain development;cell projection organization;cellular component movement;cellular component organization;cellular component organization at cellular level;cellular component organization or biogenesis;cellular component o…		actin filament bundle;actomyosin;cell cortex part;cell part;cell projection part;cortical cytoskeleton;cytoplasmic part;cytoskeletal part;cytoskeleton;growth cone;intracellular non-membrane-bounded organelle;intracellular organelle;intracellular organelle part;intracellular part;macromolecular complex;non-membrane-bounded organelle;organelle;organelle part;podosome;protein complex;site of polariz…	anatomical structure development;biological regulation;cellular component movement;cellular component organization;cellular process;developmental process;regulation of organelle organization;response to stimulus;response to stress	cell part;cytoskeleton;intracellular non-membrane-bounded organelle;intracellular organelle;macromolecular complex;organelle;protein complex;site of polarized growth	Cardiac muscle contraction;Dilated cardiomyopathy;Hypertrophic cardiomyopathy (HCM);Pathways in cancer;Thyroid cancer	Tropomyosin	AACATTC,MIR-409-3P;AACTTT_UNKNOWN;AATGTGA,MIR-23A,MIR-23B;ACATTCC,MIR-1,MIR-206;ACTIN_CYTOSKELETON;BENPORATH_SOX2_TARGETS;BOYLAN_MULTIPLE_MYELOMA_C_CLUSTER_UP;BOYLAN_MULTIPLE_MYELOMA_C_D_UP;CAGCTG_V$AP4_Q5;CAGCTTT,MIR-320;CAGGTG_V$E12_Q6;CATTGTYY_V$SOX9_B1;CHANG_CORE_SERUM_RESPONSE_UP;CHEN_METABOLIC_SYNDROM_NETWORK;chr1q21;CONTRACTILE_FIBER;CONTRACTILE_FIBER_PART;CREIGHTON_ENDOCRINE_THERAPY_RESIS…	Acetylation;Actin-binding;Alternativesplicing;Coiledcoil;Completeproteome;Cytoplasm;Cytoskeleton;Muscleprotein;Phosphoprotein;Referenceproteome	AQP2-binding multiprotein force generator complex	GO:0006140;GO:0006928;GO:0006950;GO:0007420;GO:0009611;GO:0009894;GO:0009987;GO:0010638;GO:0016043;GO:0019219;GO:0019222;GO:0030029;GO:0030030;GO:0030048;GO:0030049;GO:0030155;GO:0030334;GO:0030336;GO:0030811;GO:0031323;GO:0031329;GO:0031529;GO:0032231;GO:0032233;GO:0032502;GO:0032781;GO:0032879;GO:0032956;GO:0032970;GO:0033043;GO:0033121;GO:0033275;GO:0040012;GO:0040013;GO:0042060;GO:0043085;GO:…		GO:0001725;GO:0002102;GO:0005856;GO:0030426;GO:0030427;GO:0030863;GO:0032432;GO:0032991;GO:0042641;GO:0043226;GO:0043228;GO:0043229;GO:0043232;GO:0043234;GO:0044422;GO:0044424;GO:0044430;GO:0044444;GO:0044446;GO:0044448;GO:0044463;GO:0044464	GO:0006928;GO:0006950;GO:0009987;GO:0016043;GO:0032502;GO:0033043;GO:0048856;GO:0050896;GO:0065007	GO:0005856;GO:0030427;GO:0032991;GO:0043226;GO:0043229;GO:0043232;GO:0043234;GO:0044464			6.1129e-179	19801000000	-0.309001	0.902405	-0.373865	D3Z2H9;Q8K0Z5;E9Q5J9;P21107;D3YVR0	D3Z2H9;Q8K0Z5;E9Q5J9;P21107	Tropomyosin alpha-3 chain	Tpm3-rs7;Tpm3
28.5727	28.9938	29.9962	28.8959	28.5558	28.4474	28.2059	28.7256	29.9097	29.8456	30.5478	29.3701				catabolic process;cellular catabolic process;cellular component assembly;cellular component organization;cellular component organization or biogenesis;cellular metabolic process;cellular process;cellular response to chemical stimulus;cellular response to hydrogen peroxide;cellular response to oxidative stress;cellular response to reactive oxygen species;cellular response to stimulus;cellular resp…	antioxidant activity;binding;catalytic activity;glutathione peroxidase activity;oxidoreductase activity;oxidoreductase activity, acting on peroxide as acceptor;peroxidase activity;selenium binding	extracellular region;extracellular region part;extracellular space	catabolic process;cellular component assembly;cellular component organization;cellular metabolic process;cellular process;macromolecular complex assembly;metabolic process;protein complex assembly;response to chemical stimulus;response to oxidative stress;response to stimulus;response to stress	extracellular region;extracellular space	Arachidonic acid metabolism;Glutathione metabolism	GSHPx	ABBUD_LIF_SIGNALING_1_UP;ACEVEDO_FGFR1_TARGETS_IN_PROSTATE_CANCER_MODEL_DN;ANTIOXIDANT_ACTIVITY;ATF2_UP.V1_UP;AZARE_NEOPLASTIC_TRANSFORMATION_BY_STAT3_DN;BLALOCK_ALZHEIMERS_DISEASE_UP;BMI1_DN.V1_DN;BMI1_DN_MEL18_DN.V1_DN;BOQUEST_STEM_CELL_CULTURED_VS_FRESH_UP;BROWNE_HCMV_INFECTION_16HR_UP;BROWNE_HCMV_INFECTION_30MIN_UP;BROWNE_HCMV_INFECTION_8HR_UP;BRUINS_UVC_RESPONSE_EARLY_LATE;CATABOLIC_PROCESS;…	Completeproteome;Oxidoreductase;Peroxidase;Referenceproteome;Secreted;Selenocysteine;Signal		GO:0000302;GO:0006461;GO:0006950;GO:0006979;GO:0008152;GO:0009056;GO:0009987;GO:0010035;GO:0016043;GO:0022607;GO:0033554;GO:0034599;GO:0034614;GO:0042221;GO:0042542;GO:0042743;GO:0042744;GO:0043933;GO:0044237;GO:0044248;GO:0050896;GO:0051259;GO:0051260;GO:0051262;GO:0051289;GO:0051716;GO:0065003;GO:0070301;GO:0070887;GO:0071822;GO:0071840;GO:0072593	GO:0003824;GO:0004601;GO:0004602;GO:0005488;GO:0008430;GO:0016209;GO:0016491;GO:0016684	GO:0005576;GO:0005615;GO:0044421	GO:0006461;GO:0006950;GO:0006979;GO:0008152;GO:0009056;GO:0009987;GO:0016043;GO:0022607;GO:0042221;GO:0044237;GO:0050896;GO:0065003	GO:0005576;GO:0005615	+	+	1.6386e-27	4254800000	-1.13388	2.78228	-1.43466	D3Z2Y7;P46412;D3Z7Y0;P21765;F2Z3Y2	D3Z2Y7;P46412;D3Z7Y0	Glutathione peroxidase;Glutathione peroxidase 3	Gpx3
25.5714	26.5252	25.6388	26.6469	26.2108	24.4127	26.3334	25.7978	25.8031	26.0826	25.6879	25.9791				cellular process;establishment of localization;establishment of localization in cell;establishment of protein localization;Golgi vesicle transport;intracellular transport;protein transport;retrograde vesicle-mediated transport, Golgi to ER;transport;vesicle-mediated transport	structural molecule activity	cell part;coated vesicle;COPI vesicle coat;COPI-coated vesicle;cytoplasmic membrane-bounded vesicle;cytoplasmic part;cytoplasmic vesicle;cytoplasmic vesicle part;Golgi apparatus part;Golgi-associated vesicle;intracellular membrane-bounded organelle;intracellular organelle;intracellular organelle part;intracellular part;macromolecular complex;membrane coat;membrane part;membrane-bounded organelle;…	cellular process;establishment of localization;Golgi vesicle transport;protein transport;transport;vesicle-mediated transport	cell part;cytoplasmic membrane-bounded vesicle;intracellular membrane-bounded organelle;intracellular organelle;macromolecular complex;organelle;protein complex;vesicle		Coatomer_E	ACEVEDO_LIVER_TUMOR_VS_NORMAL_ADJACENT_TISSUE_UP;BENPORATH_NANOG_TARGETS;CAMP_UP.V1_UP;CELLULAR_LOCALIZATION;CHAUHAN_RESPONSE_TO_METHOXYESTRADIOL_DN;chr19p13;COATED_MEMBRANE;COATED_VESICLE;COATED_VESICLE_MEMBRANE;CYTOPLASM;CYTOPLASMIC_MEMBRANE_BOUND_VESICLE;CYTOPLASMIC_PART;CYTOPLASMIC_VESICLE;CYTOPLASMIC_VESICLE_MEMBRANE;CYTOPLASMIC_VESICLE_PART;ENDOMEMBRANE_SYSTEM;ENK_UV_RESPONSE_KERATINOCYTE_U…	Completeproteome;Cytoplasm;Cytoplasmicvesicle;ER-Golgitransport;Golgiapparatus;Membrane;Phosphoprotein;Proteintransport;Referenceproteome;Transport;Ublconjugation	Coatomer complex;Coatomer-Arf1 complex	GO:0006810;GO:0006890;GO:0009987;GO:0015031;GO:0016192;GO:0045184;GO:0046907;GO:0048193;GO:0051234;GO:0051649	GO:0005198	GO:0005798;GO:0016023;GO:0030117;GO:0030120;GO:0030126;GO:0030135;GO:0030137;GO:0031410;GO:0031982;GO:0031988;GO:0032991;GO:0043226;GO:0043227;GO:0043229;GO:0043231;GO:0043234;GO:0044422;GO:0044424;GO:0044425;GO:0044431;GO:0044433;GO:0044444;GO:0044446;GO:0044464	GO:0006810;GO:0009987;GO:0015031;GO:0016192;GO:0048193;GO:0051234	GO:0016023;GO:0031982;GO:0032991;GO:0043226;GO:0043229;GO:0043231;GO:0043234;GO:0044464			4.7312e-24	506070000	-0.137662	0.172287	-0.199502	D3Z315;O89079;E9Q6I5;F6YFR7;F6XIG5	D3Z315;O89079	Coatomer subunit epsilon	Cope
28.3386	27.7713	28.3043	28.2526	28.3181	27.6518	28.2602	28.4032	28.2153	27.7836	28.0316	28.3585				actin cytoskeleton organization;actin filament organization;actin filament-based process;activation of protein kinase activity;adaptive immune response;adaptive immune response based on somatic recombination of immune receptors built from immunoglobulin superfamily domains;amyloid precursor protein metabolic process;anatomical structure development;anatomical structure morphogenesis;biological ad…	binding;enzyme binding;kinase binding;phosphatase binding;protein binding;protein complex scaffold;protein kinase binding;structural molecule activity	adherens junction;anchoring junction;axon part;basolateral plasma membrane;cell junction;cell part;cell projection membrane;cell projection part;cell-cell adherens junction;cell-cell junction;cytoplasmic part;cytoskeletal part;endoplasmic reticulum membrane;endoplasmic reticulum part;Golgi apparatus;immunological synapse;internal side of plasma membrane;intracellular membrane-bounded organelle;in…	anatomical structure development;anatomical structure morphogenesis;biological adhesion;biological regulation;cell activation;cell adhesion;cell junction organization;cell proliferation;cell recognition;cellular component assembly;cellular component organization;cellular homeostasis;cellular ion homeostasis;cellular localization;cellular membrane organization;cellular metabolic process;cellular p…	cell part;Golgi apparatus;intracellular membrane-bounded organelle;intracellular organelle;macromolecular complex;membrane;nucleus;organelle;protein complex;synapse	T cell receptor signaling pathway	Guanylate_kin;L27_1;MAGUK_N_PEST;PDZ;PDZ_assoc;SH3_2	ACTIN_CYTOSKELETON_ORGANIZATION_AND_BIOGENESIS;ACTIN_FILAMENT_BASED_PROCESS;ACTIN_FILAMENT_ORGANIZATION;ANATOMICAL_STRUCTURE_DEVELOPMENT;ANATOMICAL_STRUCTURE_MORPHOGENESIS;APRELIKOVA_BRCA1_TARGETS;BASOLATERAL_PLASMA_MEMBRANE;BOHN_PRIMARY_IMMUNODEFICIENCY_SYNDROM_UP;BROWNE_HCMV_INFECTION_12HR_UP;BROWNE_HCMV_INFECTION_16HR_UP;BROWNE_HCMV_INFECTION_8HR_UP;CAGGTG_V$E12_Q6;CCTNTMAGA_UNKNOWN;CELL_CELL_…	Alternativesplicing;Celljunction;Cellmembrane;Completeproteome;Endoplasmicreticulum;Membrane;Phosphoprotein;Postsynapticcellmembrane;Referenceproteome;Repeat;SH3domain;Synapse	Cask-Dlg1 complex;Dlg3-Lin7-SAP97 complex;Lin2/CASK-SAP97 complex;SAP97-Cav-3-Kv1.5 complex	GO:0001658;GO:0001763;GO:0001771;GO:0001775;GO:0001816;GO:0001932;GO:0001935;GO:0002009;GO:0002088;GO:0002250;GO:0002252;GO:0002367;GO:0002369;GO:0002376;GO:0002440;GO:0002443;GO:0002449;GO:0002456;GO:0002460;GO:0002682;GO:0002683;GO:0002694;GO:0002695;GO:0003006;GO:0003008;GO:0003012;GO:0006873;GO:0006936;GO:0006939;GO:0006955;GO:0006996;GO:0007009;GO:0007010;GO:0007015;GO:0007043;GO:0007155;GO:…	GO:0005198;GO:0005488;GO:0005515;GO:0019899;GO:0019900;GO:0019901;GO:0019902;GO:0032947	GO:0001772;GO:0005634;GO:0005789;GO:0005794;GO:0005874;GO:0005911;GO:0005912;GO:0005913;GO:0005923;GO:0009898;GO:0014069;GO:0016020;GO:0016323;GO:0016328;GO:0030054;GO:0031090;GO:0031253;GO:0031594;GO:0032991;GO:0033267;GO:0033268;GO:0035748;GO:0043219;GO:0043226;GO:0043227;GO:0043229;GO:0043231;GO:0043234;GO:0044422;GO:0044424;GO:0044425;GO:0044430;GO:0044432;GO:0044444;GO:0044446;GO:0044456;GO:…	GO:0001775;GO:0001816;GO:0002376;GO:0006873;GO:0006936;GO:0006996;GO:0007009;GO:0007010;GO:0007155;GO:0007346;GO:0008037;GO:0008152;GO:0008283;GO:0009653;GO:0009987;GO:0016043;GO:0016044;GO:0019725;GO:0022607;GO:0022610;GO:0031399;GO:0032501;GO:0032502;GO:0033043;GO:0034330;GO:0042592;GO:0043170;GO:0044237;GO:0048856;GO:0050896;GO:0051049;GO:0051179;GO:0051641;GO:0051726;GO:0061024;GO:0065007	GO:0005634;GO:0005794;GO:0016020;GO:0032991;GO:0043226;GO:0043229;GO:0043231;GO:0043234;GO:0044464;GO:0045202			1.4102e-15	2163600000	0.0503912	0.106433	0.0610542	D3Z3B8;H7BWY4;Q811D0;E9Q9H0;F6UDT8;S4R2T8	D3Z3B8;H7BWY4;Q811D0;E9Q9H0	Disks large homolog 1	Dlg1
28.333	28.1777	28.6834	28.436	28.3951	28.5901	28.4568	28.4023	28.2903	28.5809	28.3487	28.0213				biosynthetic process;cellular biosynthetic process;cellular localization;cellular macromolecule biosynthetic process;cellular macromolecule localization;cellular macromolecule metabolic process;cellular metabolic process;cellular process;cellular protein localization;cellular protein metabolic process;localization;macromolecule biosynthetic process;macromolecule localization;macromolecule metabol…	binding;nucleic acid binding;RNA binding;rRNA binding;structural constituent of ribosome;structural molecule activity	cell part;cytoplasmic part;intracellular non-membrane-bounded organelle;intracellular organelle;intracellular organelle part;intracellular part;macromolecular complex;non-membrane-bounded organelle;nuclear part;nucleolus;organelle;organelle part;ribonucleoprotein complex;ribosome	biosynthetic process;cellular localization;cellular metabolic process;cellular process;localization;macromolecule metabolic process;metabolic process;primary metabolic process;protein metabolic process;translation	cell part;intracellular non-membrane-bounded organelle;intracellular organelle;macromolecular complex;nucleolus;organelle;ribonucleoprotein complex;ribosome	Ribosome	Ribosomal_L5;Ribosomal_L5_C	BILANGES_RAPAMYCIN_SENSITIVE_GENES;BIOSYNTHETIC_PROCESS;BOGNI_TREATMENT_RELATED_MYELOID_LEUKEMIA_UP;CAIRO_HEPATOBLASTOMA_CLASSES_UP;CELLULAR_BIOSYNTHETIC_PROCESS;CELLULAR_LOCALIZATION;CELLULAR_MACROMOLECULE_METABOLIC_PROCESS;CELLULAR_PROTEIN_METABOLIC_PROCESS;chr1p36;ESTABLISHMENT_OF_CELLULAR_LOCALIZATION;ESTABLISHMENT_OF_LOCALIZATION;ESTABLISHMENT_OF_PROTEIN_LOCALIZATION;FLECHNER_PBL_KIDNEY_TRAN…	Acetylation;Completeproteome;Nucleus;Phosphoprotein;Referenceproteome;Ribonucleoprotein;Ribosomalprotein;RNA-binding;rRNA-binding	Mdm2-P53 complex	GO:0006412;GO:0008104;GO:0008152;GO:0009058;GO:0009059;GO:0009987;GO:0019538;GO:0033036;GO:0033365;GO:0034504;GO:0034613;GO:0034645;GO:0043170;GO:0044237;GO:0044238;GO:0044249;GO:0044260;GO:0044267;GO:0051179;GO:0051641;GO:0070727	GO:0003676;GO:0003723;GO:0003735;GO:0005198;GO:0005488;GO:0019843	GO:0005730;GO:0005840;GO:0030529;GO:0032991;GO:0043226;GO:0043228;GO:0043229;GO:0043232;GO:0044422;GO:0044424;GO:0044428;GO:0044444;GO:0044446;GO:0044464	GO:0006412;GO:0008152;GO:0009058;GO:0009987;GO:0019538;GO:0043170;GO:0044237;GO:0044238;GO:0051179;GO:0051641	GO:0005730;GO:0005840;GO:0030529;GO:0032991;GO:0043226;GO:0043229;GO:0043232;GO:0044464			1.2809e-25	2420100000	0.134236	0.572017	0.150818	Q9CXW4;E9PYL9;D3Z3K1;E9PZB3;A2BH06;D3YW69	Q9CXW4;E9PYL9;D3Z3K1;E9PZB3;A2BH06;D3YW69	60S ribosomal protein L11	Rpl11;Gm10036;Gm10288;Gm5093;Gm7589
23.8918	25.5459	24.6051	24.8814	24.3554	25.4661	24.6076	24.3047	24.6217	23.2851	23.5404	24.6579				actin cytoskeleton organization;actin filament bundle assembly;actin filament organization;actin filament-based process;biological regulation;carbohydrate transport;cell junction assembly;cell junction organization;cell surface receptor linked signaling pathway;cell-substrate junction assembly;cellular component assembly;cellular component assembly at cellular level;cellular component organizatio…	binding;enzyme binding;insulin receptor binding;kinase binding;protein binding;protein complex binding;protein kinase binding;receptor binding	actin filament bundle;actomyosin;adherens junction;anchoring junction;cell junction;cell part;cell-cell adherens junction;cell-cell junction;cell-substrate adherens junction;cell-substrate junction;centrosome;cytoplasm;cytoplasmic part;cytoskeletal part;cytosol;focal adhesion;insulin receptor complex;intracellular membrane-bounded organelle;intracellular non-membrane-bounded organelle;intracellul…	biological regulation;carbohydrate transport;cell junction organization;cellular component assembly;cellular component organization;cellular process;cytoskeleton organization;establishment of localization;organelle organization;regulation of transport;response to chemical stimulus;response to endogenous stimulus;response to stimulus;signal transduction;transport	cell part;centrosome;cytoplasm;cytosol;intracellular membrane-bounded organelle;intracellular non-membrane-bounded organelle;intracellular organelle;macromolecular complex;membrane;microtubule organizing center;nucleus;organelle;plasma membrane;protein complex;receptor complex	Adherens junction;Insulin signaling pathway;PPAR signaling pathway	SH3_1;SH3_2;Sorb	AACTTT_UNKNOWN;ACEVEDO_FGFR1_TARGETS_IN_PROSTATE_CANCER_MODEL_DN;ACTIN_BINDING;ACTIN_CYTOSKELETON;ACTIN_CYTOSKELETON_ORGANIZATION_AND_BIOGENESIS;ACTIN_FILAMENT_BASED_PROCESS;ACTIN_FILAMENT_BUNDLE_FORMATION;ACTIN_FILAMENT_ORGANIZATION;ACTTTAT,MIR-142-5P;ADHERENS_JUNCTION;APICAL_JUNCTION_COMPLEX;APICOLATERAL_PLASMA_MEMBRANE;ATF2_S_UP.V1_DN;ATGAAGG,MIR-205;BASOLATERAL_PLASMA_MEMBRANE;BENPORATH_NANOG…	Alternativesplicing;Celljunction;Cellmembrane;Completeproteome;Cytoplasm;Cytoskeleton;Glycoprotein;Membrane;Nucleus;Phosphoprotein;Referenceproteome;Repeat;SH3domain;Transport		GO:0005979;GO:0006109;GO:0006810;GO:0006996;GO:0007010;GO:0007015;GO:0007044;GO:0007165;GO:0007166;GO:0007167;GO:0007169;GO:0008286;GO:0008643;GO:0008645;GO:0009719;GO:0009725;GO:0009889;GO:0009891;GO:0009893;GO:0009987;GO:0010033;GO:0010556;GO:0010557;GO:0010604;GO:0010675;GO:0010676;GO:0010827;GO:0010828;GO:0010906;GO:0010907;GO:0010962;GO:0015749;GO:0015758;GO:0016043;GO:0019216;GO:0019222;GO:…	GO:0005102;GO:0005158;GO:0005488;GO:0005515;GO:0019899;GO:0019900;GO:0019901;GO:0032403	GO:0001725;GO:0005634;GO:0005737;GO:0005813;GO:0005815;GO:0005829;GO:0005886;GO:0005899;GO:0005911;GO:0005912;GO:0005913;GO:0005924;GO:0005925;GO:0016020;GO:0016363;GO:0030054;GO:0030055;GO:0032432;GO:0032991;GO:0042641;GO:0043226;GO:0043227;GO:0043228;GO:0043229;GO:0043231;GO:0043232;GO:0043234;GO:0043235;GO:0044422;GO:0044424;GO:0044425;GO:0044428;GO:0044430;GO:0044444;GO:0044446;GO:0044459;GO:…	GO:0006810;GO:0006996;GO:0007010;GO:0007165;GO:0008643;GO:0009719;GO:0009987;GO:0016043;GO:0022607;GO:0034330;GO:0042221;GO:0050896;GO:0051049;GO:0051234;GO:0065007	GO:0005634;GO:0005737;GO:0005813;GO:0005815;GO:0005829;GO:0005886;GO:0016020;GO:0032991;GO:0043226;GO:0043229;GO:0043231;GO:0043232;GO:0043234;GO:0043235;GO:0044464			3.6743e-14	189960000	0.453846	0.715005	0.657154	E9Q6A3;E9PYX6;E9QNA7;D3Z5J3;Q62417	E9Q6A3;E9PYX6;E9QNA7;D3Z5J3;Q62417	Sorbin and SH3 domain-containing protein 1	Sorbs1
28.7727	28.3245	28.891	28.7456	28.5262	28.8045	28.7617	28.544	28.0956	28.8257	27.863	27.982				biological regulation;biosynthetic process;cell differentiation;cellular biosynthetic process;cellular developmental process;cellular macromolecule biosynthetic process;cellular macromolecule metabolic process;cellular metabolic process;cellular process;cellular protein metabolic process;developmental process;induction of apoptosis;induction of programmed cell death;macromolecule biosynthetic pro…	structural constituent of ribosome;structural molecule activity	cell part;cytoplasmic part;cytosol;intracellular membrane-bounded organelle;intracellular non-membrane-bounded organelle;intracellular organelle;intracellular part;macromolecular complex;membrane-bounded organelle;non-membrane-bounded organelle;nucleus;organelle;ribonucleoprotein complex;ribosome	biological regulation;biosynthetic process;cell differentiation;cellular metabolic process;cellular process;developmental process;macromolecule metabolic process;metabolic process;primary metabolic process;protein metabolic process;translation	cell part;cytosol;intracellular membrane-bounded organelle;intracellular non-membrane-bounded organelle;intracellular organelle;macromolecular complex;nucleus;organelle;ribonucleoprotein complex;ribosome	Ribosome	Ribosomal_S3Ae	ACEVEDO_NORMAL_TISSUE_ADJACENT_TO_LIVER_TUMOR_UP;APOPTOSIS_GO;BENPORATH_NANOG_TARGETS;BENPORATH_NOS_TARGETS;BENPORATH_OCT4_TARGETS;BENPORATH_SOX2_TARGETS;BILANGES_SERUM_AND_RAPAMYCIN_SENSITIVE_GENES;BIOSYNTHETIC_PROCESS;CELL_DEVELOPMENT;CELLULAR_BIOSYNTHETIC_PROCESS;CELLULAR_COMPONENT_ASSEMBLY;CELLULAR_MACROMOLECULE_METABOLIC_PROCESS;CELLULAR_PROTEIN_METABOLIC_PROCESS;chr4q31;CYTOPLASM;CYTOPLASMI…	Acetylation;Completeproteome;Cytoplasm;Differentiation;Nucleus;Phosphoprotein;Referenceproteome;Ribonucleoprotein;Ribosomalprotein	Parvulin-associated pre-rRNP complex	GO:0006412;GO:0006917;GO:0008152;GO:0009058;GO:0009059;GO:0009987;GO:0010941;GO:0010942;GO:0012502;GO:0019538;GO:0030154;GO:0032502;GO:0034645;GO:0042981;GO:0043065;GO:0043067;GO:0043068;GO:0043170;GO:0044237;GO:0044238;GO:0044249;GO:0044260;GO:0044267;GO:0048518;GO:0048522;GO:0048869;GO:0050789;GO:0050794;GO:0065007	GO:0003735;GO:0005198	GO:0005634;GO:0005829;GO:0005840;GO:0030529;GO:0032991;GO:0043226;GO:0043227;GO:0043228;GO:0043229;GO:0043231;GO:0043232;GO:0044424;GO:0044444;GO:0044464	GO:0006412;GO:0008152;GO:0009058;GO:0009987;GO:0019538;GO:0030154;GO:0032502;GO:0043170;GO:0044237;GO:0044238;GO:0065007	GO:0005634;GO:0005829;GO:0005840;GO:0030529;GO:0032991;GO:0043226;GO:0043229;GO:0043231;GO:0043232;GO:0044464			4.6568e-64	2985300000	0.380604	1.06267	0.467517	P97351;D3Z6C3;D3Z7W7	P97351;D3Z6C3;D3Z7W7	40S ribosomal protein S3a	Rps3a;Rps3a2;Rps3a3
27.9159	26.9408	26.7525	28.0065	27.9146	27.8441	28.1027	27.9068	27.9555	27.6876	27.7113	28.1703						actin filament bundle;actomyosin;cell cortex part;cell part;cell projection part;cortical cytoskeleton;cytoplasmic part;cytoskeletal part;cytoskeleton;growth cone;intracellular non-membrane-bounded organelle;intracellular organelle;intracellular organelle part;intracellular part;macromolecular complex;non-membrane-bounded organelle;organelle;organelle part;podosome;protein complex;site of polariz…		cell part;cytoskeleton;intracellular non-membrane-bounded organelle;intracellular organelle;macromolecular complex;organelle;protein complex;site of polarized growth		Tropomyosin	AACATTC,MIR-409-3P;AACTTT_UNKNOWN;AATGTGA,MIR-23A,MIR-23B;ACATTCC,MIR-1,MIR-206;ACTIN_CYTOSKELETON;BENPORATH_SOX2_TARGETS;BOYLAN_MULTIPLE_MYELOMA_C_CLUSTER_UP;BOYLAN_MULTIPLE_MYELOMA_C_D_UP;CAGCTG_V$AP4_Q5;CAGCTTT,MIR-320;CAGGTG_V$E12_Q6;CATTGTYY_V$SOX9_B1;CHANG_CORE_SERUM_RESPONSE_UP;CHEN_METABOLIC_SYNDROM_NETWORK;chr1q21;CONTRACTILE_FIBER;CONTRACTILE_FIBER_PART;CREIGHTON_ENDOCRINE_THERAPY_RESIS…	Coiledcoil;Completeproteome;Referenceproteome				GO:0001725;GO:0002102;GO:0005856;GO:0030426;GO:0030427;GO:0030863;GO:0032432;GO:0032991;GO:0042641;GO:0043226;GO:0043228;GO:0043229;GO:0043232;GO:0043234;GO:0044422;GO:0044424;GO:0044430;GO:0044444;GO:0044446;GO:0044448;GO:0044463;GO:0044464		GO:0005856;GO:0030427;GO:0032991;GO:0043226;GO:0043229;GO:0043232;GO:0043234;GO:0044464			8.1496e-168	1602000000	0.0540528	0.188475	0.060905	D3Z6I8;E9Q7Q3	D3Z6I8;E9Q7Q3		Tpm3
27.8923	28.3494	28.2369	28.5077	28.316	28.0705	28.3055	28.4834	27.9522	28.0928	28.5208	28.2816				cell communication;cellular process;establishment of localization;establishment of protein localization;protein transport;transport	binding;lipid binding;phosphatidylinositol binding;phosphatidylinositol-3-phosphate binding;phospholipid binding	cell part;cytoplasmic part;early endosome;endosomal part;endosome;endosome membrane;intracellular membrane-bounded organelle;intracellular organelle;intracellular organelle part;intracellular part;membrane;membrane-bounded organelle;organelle;organelle membrane;organelle part	cell communication;cellular process;establishment of localization;protein transport;transport	cell part;endosome;intracellular membrane-bounded organelle;intracellular organelle;membrane;organelle		PX	AGUIRRE_PANCREATIC_CANCER_COPY_NUMBER_DN;ATGTCAC,MIR-489;BENPORATH_MYC_MAX_TARGETS;BLALOCK_ALZHEIMERS_DISEASE_DN;BONOME_OVARIAN_CANCER_SURVIVAL_SUBOPTIMAL_DEBULKING;BYSTRYKH_HEMATOPOIESIS_STEM_CELL_QTL_TRANS;CCTGCTG,MIR-214;chr6q21;chrxq13;CYTOPLASM;DANG_BOUND_BY_MYC;DAZARD_RESPONSE_TO_UV_SCC_UP;DE_YY1_TARGETS_DN;DIAZ_CHRONIC_MEYLOGENOUS_LEUKEMIA_UP;ESTABLISHMENT_OF_LOCALIZATION;FORTSCHEGGER_PHF8…	Acetylation;Completeproteome;Endosome;Lipid-binding;Membrane;Phosphoprotein;Proteintransport;Referenceproteome;Transport;Ublconjugation		GO:0006810;GO:0007154;GO:0009987;GO:0015031;GO:0045184;GO:0051234	GO:0005488;GO:0005543;GO:0008289;GO:0032266;GO:0035091	GO:0005768;GO:0005769;GO:0010008;GO:0016020;GO:0031090;GO:0043226;GO:0043227;GO:0043229;GO:0043231;GO:0044422;GO:0044424;GO:0044440;GO:0044444;GO:0044446;GO:0044464	GO:0006810;GO:0007154;GO:0009987;GO:0015031;GO:0051234	GO:0005768;GO:0016020;GO:0043226;GO:0043229;GO:0043231;GO:0044464			2.2823e-25	2427000000	0.0713585	0.219592	0.0820298	D3Z789;D3Z6Z0;Q78ZM0;O70492;O70493	D3Z789;D3Z6Z0;Q78ZM0;O70492	Sorting nexin-3	Snx3
26.0026	26.0003	25.7995	25.6929	25.6107	25.28	25.8401	25.5649	25.8794	25.8549	25.1717	25.8719				biological regulation;cellular macromolecule metabolic process;cellular metabolic process;cellular process;cellular protein metabolic process;macromolecule metabolic process;macromolecule modification;metabolic process;positive regulation of biological process;positive regulation of biosynthetic process;positive regulation of cellular biosynthetic process;positive regulation of cellular metabolic…	acid-amino acid ligase activity;binding;catalytic activity;enzyme binding;ligase activity;ligase activity, forming carbon-nitrogen bonds;protein binding;small conjugating protein ligase activity;SUMO ligase activity;ubiquitin protein ligase binding	cell part;intracellular organelle part;intracellular part;nuclear body;nuclear part;nucleoplasm part;organelle part;PML body	biological regulation;cellular metabolic process;cellular process;macromolecule metabolic process;macromolecule modification;metabolic process;primary metabolic process;protein metabolic process;protein modification by small protein conjugation or removal;protein modification process	cell part	RNA transport	Rad60-SLD	AAAGGGA,MIR-204,MIR-211;AACTTT_UNKNOWN;ACCTGTTG_UNKNOWN;ACEVEDO_LIVER_CANCER_UP;ACEVEDO_NORMAL_TISSUE_ADJACENT_TO_LIVER_TUMOR_UP;BLALOCK_ALZHEIMERS_DISEASE_DN;BROWNE_HCMV_INFECTION_1HR_DN;BROWNE_HCMV_INFECTION_48HR_DN;BROWNE_HCMV_INFECTION_4HR_DN;BRUINS_UVC_RESPONSE_LATE;CAGCTG_V$AP4_Q5;chr17q25;CTGTTAC,MIR-194;DANG_REGULATED_BY_MYC_UP;DODD_NASOPHARYNGEAL_CARCINOMA_DN;GCCATNTTG_V$YY1_Q6;GCM_ACTG1…	Completeproteome;Isopeptidebond;Nucleus;Referenceproteome;Ublconjugation;Ublconjugationpathway		GO:0006355;GO:0006357;GO:0006464;GO:0008152;GO:0009889;GO:0009891;GO:0009893;GO:0009987;GO:0010468;GO:0010556;GO:0010557;GO:0010604;GO:0010628;GO:0016925;GO:0019219;GO:0019222;GO:0019538;GO:0031323;GO:0031325;GO:0031326;GO:0031328;GO:0032446;GO:0043170;GO:0043412;GO:0044237;GO:0044238;GO:0044260;GO:0044267;GO:0045893;GO:0045935;GO:0045944;GO:0048518;GO:0048522;GO:0050789;GO:0050794;GO:0051171;GO:…	GO:0003824;GO:0005488;GO:0005515;GO:0016874;GO:0016879;GO:0016881;GO:0019787;GO:0019789;GO:0019899;GO:0031625	GO:0016604;GO:0016605;GO:0044422;GO:0044424;GO:0044428;GO:0044446;GO:0044451;GO:0044464	GO:0006464;GO:0008152;GO:0009987;GO:0019538;GO:0043170;GO:0043412;GO:0044237;GO:0044238;GO:0065007;GO:0070647	GO:0044464			6.5691e-08	419700000	-0.0996983	0.232945	-0.120519	H7BWX9;D3Z794;P61957	H7BWX9;D3Z794;P61957	Small ubiquitin-related modifier 2	Sumo2
26.4698	23.4287	26.7214	26.7398	25.6295	23.9876	25.5845	23.31	26.7017	27.2161	26.8866	27.1356				biosynthetic process;carboxylic acid biosynthetic process;carboxylic acid metabolic process;cellular biosynthetic process;cellular ketone metabolic process;cellular lipid metabolic process;cellular macromolecule metabolic process;cellular metabolic process;cellular process;cellular protein metabolic process;chaperone cofactor-dependent protein refolding;chaperone-mediated protein folding;fatty ac…	binding;catalytic activity;DNA polymerase activity;intramolecular oxidoreductase activity;isomerase activity;nucleotidyltransferase activity;prostaglandin-E synthase activity;protein binding;RNA-directed DNA polymerase activity;telomerase activity;transferase activity;transferase activity, transferring phosphorus-containing groups;unfolded protein binding	cell part;cytoplasm;intracellular organelle part;intracellular part;macromolecular complex;nuclear part;organelle part;ribonucleoprotein complex;telomerase holoenzyme complex	biosynthetic process;cellular ketone metabolic process;cellular lipid metabolic process;cellular metabolic process;cellular process;lipid metabolic process;macromolecule metabolic process;metabolic process;organic acid metabolic process;primary metabolic process;protein folding;protein metabolic process;small molecule metabolic process	cell part;cytoplasm;macromolecular complex;ribonucleoprotein complex;telomerase holoenzyme complex		CS	ACEVEDO_LIVER_CANCER_UP;ACEVEDO_NORMAL_TISSUE_ADJACENT_TO_LIVER_TUMOR_UP;AGTCAGC,MIR-345;ATTCTTT,MIR-186;BENPORATH_MYC_MAX_TARGETS;BERENJENO_TRANSFORMED_BY_RHOA_UP;BIDUS_METASTASIS_UP;BIOPOLYMER_METABOLIC_PROCESS;BIOSYNTHETIC_PROCESS;BLALOCK_ALZHEIMERS_DISEASE_DN;BORCZUK_MALIGNANT_MESOTHELIOMA_UP;BOYAULT_LIVER_CANCER_SUBCLASS_G3_UP;CAGTGTT,MIR-141,MIR-200A;CARBOXYLIC_ACID_METABOLIC_PROCESS;CELLUL…	Acetylation;Completeproteome;Cytoplasm;Directproteinsequencing;Fattyacidbiosynthesis;Fattyacidmetabolism;Isomerase;Lipidbiosynthesis;Lipidmetabolism;Phosphoprotein;Prostaglandinbiosynthesis;Prostaglandinmetabolism;Referenceproteome		GO:0001516;GO:0006082;GO:0006457;GO:0006629;GO:0006631;GO:0006633;GO:0006636;GO:0006690;GO:0006692;GO:0006693;GO:0008152;GO:0008610;GO:0009058;GO:0009987;GO:0016053;GO:0019538;GO:0019752;GO:0032787;GO:0033559;GO:0042026;GO:0042180;GO:0043170;GO:0043436;GO:0044237;GO:0044238;GO:0044249;GO:0044255;GO:0044260;GO:0044267;GO:0044281;GO:0044283;GO:0046394;GO:0046456;GO:0046457;GO:0061077;GO:0070389	GO:0003720;GO:0003824;GO:0003964;GO:0005488;GO:0005515;GO:0016740;GO:0016772;GO:0016779;GO:0016853;GO:0016860;GO:0034061;GO:0050220;GO:0051082	GO:0005697;GO:0005737;GO:0030529;GO:0032991;GO:0044422;GO:0044424;GO:0044428;GO:0044446;GO:0044464	GO:0006082;GO:0006457;GO:0006629;GO:0008152;GO:0009058;GO:0009987;GO:0019538;GO:0042180;GO:0043170;GO:0044237;GO:0044238;GO:0044255;GO:0044281	GO:0005697;GO:0005737;GO:0030529;GO:0032991;GO:0044464	+	+	2.7444e-13	728370000	-1.47894	2.13252	-2.35712	D3Z7C6;Q9R0Q7	D3Z7C6;Q9R0Q7	Prostaglandin E synthase 3	Ptges3
25.618	25.643	26.2532	25.7995	27.3235	26.0118	25.8122	26.9877	27.0595	25.3908	27.4368	26.0195				amine biosynthetic process;amine catabolic process;amine metabolic process;behavior;biological regulation;biosynthetic process;carboxylic acid biosynthetic process;carboxylic acid catabolic process;carboxylic acid metabolic process;catabolic process;cell communication;cell-cell signaling;cellular amine metabolic process;cellular amino acid biosynthetic process;cellular amino acid catabolic proces…	catalytic activity;glutaminase activity;hydrolase activity;hydrolase activity, acting on carbon-nitrogen (but not peptide) bonds;hydrolase activity, acting on carbon-nitrogen (but not peptide) bonds, in linear amides	cell part;cytoplasmic part;cytosol;intracellular membrane-bounded organelle;intracellular organelle;intracellular part;membrane-bounded organelle;mitochondrion;organelle	amine metabolic process;behavior;biological regulation;biosynthetic process;catabolic process;cell communication;cell-cell signaling;cellular amino acid metabolic process;cellular component assembly;cellular component organization;cellular ketone metabolic process;cellular metabolic process;cellular nitrogen compound metabolic process;cellular process;macromolecular complex assembly;metabolic pro…	cell part;cytosol;intracellular membrane-bounded organelle;intracellular organelle;mitochondrion;organelle	Alanine, aspartate and glutamate metabolism;Arginine and proline metabolism;D-Glutamine and D-glutamate metabolism;Nitrogen metabolism;Proximal tubule bicarbonate reclamation	Ank_2;Glutaminase	AACTTT_UNKNOWN;AATGTGA,MIR-23A,MIR-23B;ACOSTA_PROLIFERATION_INDEPENDENT_MYC_TARGETS_UP;BASAKI_YBX1_TARGETS_UP;BLALOCK_ALZHEIMERS_DISEASE_DN;BONOME_OVARIAN_CANCER_SURVIVAL_SUBOPTIMAL_DEBULKING;BOQUEST_STEM_CELL_CULTURED_VS_FRESH_UP;BOYLAN_MULTIPLE_MYELOMA_C_D_UP;BRUECKNER_TARGETS_OF_MIRLET7A3_DN;CAMP_UP.V1_DN;CHANG_CORE_SERUM_RESPONSE_DN;CHARAFE_BREAST_CANCER_LUMINAL_VS_MESENCHYMAL_DN;chr2q32;CONC…	3D-structure;Acetylation;Alternativesplicing;ANKrepeat;Completeproteome;Cytoplasm;Hydrolase;Mitochondrion;Referenceproteome;Repeat;Transitpeptide		GO:0002087;GO:0003008;GO:0006082;GO:0006461;GO:0006520;GO:0006536;GO:0006537;GO:0006541;GO:0006543;GO:0006807;GO:0007154;GO:0007267;GO:0007268;GO:0007610;GO:0008152;GO:0008652;GO:0009056;GO:0009058;GO:0009063;GO:0009064;GO:0009065;GO:0009084;GO:0009308;GO:0009309;GO:0009310;GO:0009987;GO:0016043;GO:0016053;GO:0016054;GO:0019752;GO:0022607;GO:0023052;GO:0032501;GO:0034641;GO:0042180;GO:0043436;GO:…	GO:0003824;GO:0004359;GO:0016787;GO:0016810;GO:0016811	GO:0005739;GO:0005829;GO:0043226;GO:0043227;GO:0043229;GO:0043231;GO:0044424;GO:0044444;GO:0044464	GO:0006082;GO:0006461;GO:0006520;GO:0006807;GO:0007154;GO:0007267;GO:0007610;GO:0008152;GO:0009056;GO:0009058;GO:0009308;GO:0009987;GO:0016043;GO:0022607;GO:0023052;GO:0032501;GO:0034641;GO:0042180;GO:0044237;GO:0044238;GO:0044281;GO:0050877;GO:0050896;GO:0065003;GO:0065007	GO:0005739;GO:0005829;GO:0043226;GO:0043229;GO:0043231;GO:0044464			4.5583e-32	628850000	0.0357608	0.0329761	0.0570989	D3Z7P3;D3Z7P4;F6U529;F7B327;D3Z7P5;F6RDM4	D3Z7P3;D3Z7P4	Glutaminase kidney isoform, mitochondrial	Gls
24.883	25.5951	25.5116	25.3201	25.5931	26.112	28.4005	26.2207	24.8991	24.5269	25.8484	24.6718						cell part;cytoplasmic part;integral to membrane;intracellular membrane-bounded organelle;intracellular organelle;intracellular organelle part;intracellular part;intrinsic to membrane;macromolecular complex;membrane;membrane part;membrane-bounded organelle;microbody;microbody membrane;microbody part;mitochondrion;organelle;organelle membrane;organelle part;peroxisomal membrane;peroxisomal part;pro…		cell part;intracellular membrane-bounded organelle;intracellular organelle;macromolecular complex;membrane;microbody;mitochondrion;organelle;protein complex	Peroxisome	Mpv17_PMP22	ALCALAY_AML_BY_NPM1_LOCALIZATION_DN;BENPORATH_EED_TARGETS;BENPORATH_ES_WITH_H3K27ME3;BENPORATH_PRC2_TARGETS;BENPORATH_SUZ12_TARGETS;BILD_E2F3_ONCOGENIC_SIGNATURE;BLUM_RESPONSE_TO_SALIRASIB_DN;BURTON_ADIPOGENESIS_6;BUYTAERT_PHOTODYNAMIC_THERAPY_STRESS_DN;BYSTRYKH_HEMATOPOIESIS_STEM_CELL_AND_BRAIN_QTL_TRANS;CAIRO_HEPATOBLASTOMA_DN;CHEN_METABOLIC_SYNDROM_NETWORK;chr12q24;CHYLA_CBFA2T3_TARGETS_DN;DOD…	Completeproteome;Membrane;Peroxisome;Referenceproteome;Transmembrane;Transmembranehelix				GO:0005739;GO:0005778;GO:0016020;GO:0016021;GO:0031090;GO:0031224;GO:0031903;GO:0032991;GO:0042579;GO:0043226;GO:0043227;GO:0043229;GO:0043231;GO:0043234;GO:0044422;GO:0044424;GO:0044425;GO:0044438;GO:0044439;GO:0044444;GO:0044446;GO:0044464		GO:0005739;GO:0016020;GO:0032991;GO:0042579;GO:0043226;GO:0043229;GO:0043231;GO:0043234;GO:0044464	+		4.4741e-12	409850000	0.944362	1.22285	1.59505	D6REH1;Q5D073;P42925	D6REH1;Q5D073;P42925	Peroxisomal membrane protein 2	Pxmp2
24.8243	25.2517	24.659	24.0162	25.0268	25.4164	25.0438	24.5552	24.8229	25.1274	24.2796	23.6739					carbon-carbon lyase activity;carboxy-lyase activity;catalytic activity;lyase activity;methylmalonyl-CoA decarboxylase activity	cell part;cytoplasmic part;cytosol;intracellular part		cell part;cytosol		ECH	BRUINS_UVC_RESPONSE_LATE;CASORELLI_ACUTE_PROMYELOCYTIC_LEUKEMIA_DN;CHANDRAN_METASTASIS_DN;CHARAFE_BREAST_CANCER_LUMINAL_VS_MESENCHYMAL_DN;chr6q22;FARMER_BREAST_CANCER_APOCRINE_VS_BASAL;FARMER_BREAST_CANCER_APOCRINE_VS_LUMINAL;FULCHER_INFLAMMATORY_RESPONSE_LECTIN_VS_LPS_DN;GINESTIER_BREAST_CANCER_20Q13_AMPLIFICATION_DN;GSE11864_CSF1_IFNG_VS_CSF1_PAM3CYS_IN_MAC_UP;GSE13485_DAY1_VS_DAY21_YF17D_VACCI…	Alternativesplicing;Completeproteome;Cytoplasm;Lyase;Referenceproteome			GO:0003824;GO:0004492;GO:0016829;GO:0016830;GO:0016831	GO:0005829;GO:0044424;GO:0044444;GO:0044464		GO:0005829;GO:0044464			4.3712e-09	190010000	0.391597	0.713262	0.53459	E0CXS3;Q9D9V3	E0CXS3;Q9D9V3	Ethylmalonyl-CoA decarboxylase	Echdc1
24.6422	28.8467	23.8859	28.1617	28.4358	24.6505	28.3047	28.1575	28.4423	28.4012	28.2153	23.5658				amine metabolic process;carboxylic acid metabolic process;cellular amine metabolic process;cellular amino acid metabolic process;cellular ketone metabolic process;cellular metabolic process;cellular modified amino acid metabolic process;cellular nitrogen compound metabolic process;cellular process;coenzyme metabolic process;cofactor metabolic process;heterocycle metabolic process;metabolic proces…	carboxyl-O-methyltransferase activity;catalytic activity;methyltransferase activity;O-methyltransferase activity;protein carboxyl O-methyltransferase activity;protein methyltransferase activity;protein-L-isoaspartate (D-aspartate) O-methyltransferase activity;S-adenosylmethionine-dependent methyltransferase activity;transferase activity;transferase activity, transferring one-carbon groups	cell part;cytoplasm;intracellular part	amine metabolic process;cellular amino acid metabolic process;cellular ketone metabolic process;cellular metabolic process;cellular nitrogen compound metabolic process;cellular process;cofactor metabolic process;heterocycle metabolic process;metabolic process;nitrogen compound metabolic process;nucleobase-containing compound metabolic process;nucleobase-containing small molecule metabolic process…	cell part;cytoplasm		PCMT	ACEVEDO_LIVER_CANCER_DN;ACEVEDO_LIVER_TUMOR_VS_NORMAL_ADJACENT_TISSUE_DN;BAELDE_DIABETIC_NEPHROPATHY_DN;BENPORATH_MYC_MAX_TARGETS;BHATI_G2M_ARREST_BY_2METHOXYESTRADIOL_UP;BIOPOLYMER_METABOLIC_PROCESS;BIOPOLYMER_MODIFICATION;BLALOCK_ALZHEIMERS_DISEASE_DN;BORCZUK_MALIGNANT_MESOTHELIOMA_UP;BRUINS_UVC_RESPONSE_LATE;CCACACA,MIR-147;CELLULAR_MACROMOLECULE_METABOLIC_PROCESS;CELLULAR_PROTEIN_METABOLIC_PR…	Acetylation;Alternativesplicing;Completeproteome;Cytoplasm;Directproteinsequencing;Methyltransferase;Referenceproteome;S-adenosyl-L-methionine;Transferase		GO:0006082;GO:0006139;GO:0006520;GO:0006575;GO:0006732;GO:0006790;GO:0006807;GO:0008152;GO:0009116;GO:0009119;GO:0009308;GO:0009987;GO:0019752;GO:0034641;GO:0042180;GO:0042278;GO:0043436;GO:0044106;GO:0044237;GO:0044238;GO:0044281;GO:0046128;GO:0046483;GO:0046498;GO:0046500;GO:0051186;GO:0055086;GO:0072521	GO:0003824;GO:0004719;GO:0008168;GO:0008171;GO:0008276;GO:0008757;GO:0010340;GO:0016740;GO:0016741;GO:0051998	GO:0005737;GO:0044424;GO:0044464	GO:0006082;GO:0006139;GO:0006520;GO:0006790;GO:0006807;GO:0008152;GO:0009116;GO:0009308;GO:0009987;GO:0034641;GO:0042180;GO:0044237;GO:0044238;GO:0044281;GO:0046483;GO:0051186;GO:0055086	GO:0005737;GO:0044464			2.8805e-05	1948300000	0.0921469	0.0539494	0.230981	P23506;F7D432;E9PWE0;E0CYV0;F6TXE3;F6V9F1	P23506;F7D432;E9PWE0;E0CYV0;F6TXE3;F6V9F1	Protein-L-isoaspartate(D-aspartate) O-methyltransferase;Protein-L-isoaspartate O-methyltransferase	Pcmt1
29.4062	31.4737	30.9436	30.2949	30.8276	29.7647	31.3	30.2645	30.878	31.4879	30.4896	30.3414				biological regulation;cellular component assembly;cellular component assembly at cellular level;cellular component organization;cellular component organization at cellular level;cellular component organization or biogenesis;cellular component organization or biogenesis at cellular level;cellular macromolecular complex assembly;cellular macromolecular complex subunit organization;cellular process;…	binding;DNA binding;nucleic acid binding	cell part;chromosomal part;intracellular membrane-bounded organelle;intracellular organelle;intracellular organelle part;intracellular part;macromolecular complex;membrane-bounded organelle;nuclear part;nucleoplasm;nucleosome;nucleus;organelle;organelle part;protein-DNA complex	biological regulation;cellular component assembly;cellular component organization;cellular macromolecular complex assembly;cellular process;chromatin organization;chromosome organization;macromolecular complex assembly;organelle organization	cell part;intracellular membrane-bounded organelle;intracellular organelle;macromolecular complex;nucleoplasm;nucleosome;nucleus;organelle	Systemic lupus erythematosus	Histone	AAAYRNCTG_UNKNOWN;AACTTT_UNKNOWN;ACAGGGT,MIR-10A,MIR-10B;ACEVEDO_LIVER_CANCER_UP;ACEVEDO_LIVER_TUMOR_VS_NORMAL_ADJACENT_TISSUE_UP;ACEVEDO_METHYLATED_IN_LIVER_CANCER_DN;ACTGTGA,MIR-27A,MIR-27B;ACTTTAT,MIR-142-5P;AGCATTA,MIR-155;AGGAGTG,MIR-483;AMIT_EGF_RESPONSE_60_HELA;ATGTTAA,MIR-302C;ATGTTTC,MIR-494;BENPORATH_EED_TARGETS;BERENJENO_TRANSFORMED_BY_RHOA_DN;CACGTG_V$MYC_Q2;CACTGTG,MIR-128A,MIR-128B;…	3D-structure;Acetylation;Chromosome;Citrullination;Completeproteome;Directproteinsequencing;DNA-binding;Methylation;Nucleosomecore;Nucleus;Phosphoprotein;Referenceproteome;Ublconjugation		GO:0006325;GO:0006334;GO:0006996;GO:0009987;GO:0016043;GO:0022607;GO:0034621;GO:0034622;GO:0034728;GO:0043933;GO:0050789;GO:0050794;GO:0051276;GO:0060968;GO:0065003;GO:0065004;GO:0065007;GO:0071824;GO:0071840;GO:0071841;GO:0071842;GO:0071844	GO:0003676;GO:0003677;GO:0005488	GO:0000786;GO:0005634;GO:0005654;GO:0032991;GO:0032993;GO:0043226;GO:0043227;GO:0043229;GO:0043231;GO:0044422;GO:0044424;GO:0044427;GO:0044428;GO:0044446;GO:0044464	GO:0006325;GO:0006996;GO:0009987;GO:0016043;GO:0022607;GO:0034622;GO:0051276;GO:0065003;GO:0065007	GO:0000786;GO:0005634;GO:0005654;GO:0032991;GO:0043226;GO:0043229;GO:0043231;GO:0044464			1.086e-158	11985000000	-0.183017	0.252419	-0.260002	E0CZ27;P84244;P02301;F8WI35;P68433	E0CZ27;P84244;P02301;F8WI35;P68433	Histone H3;Histone H3.3;Histone H3.3C;Histone H3.1	H3f3a;H3f3c;Hist1h3a
27.1217	26.9322	27.1119	27.4554	27.5321	27.6312	27.2449	27.6167	26.9655	27.639	27.6612	27.5912				anatomical structure morphogenesis;apoptotic mitochondrial changes;biological regulation;catabolic process;cell part morphogenesis;cellular catabolic process;cellular component assembly;cellular component assembly at cellular level;cellular component morphogenesis;cellular component organization;cellular component organization at cellular level;cellular component organization or biogenesis;cellul…	binding;catalytic activity;GTP binding;GTPase activity;guanyl nucleotide binding;guanyl ribonucleotide binding;hydrolase activity;hydrolase activity, acting on acid anhydrides;hydrolase activity, acting on acid anhydrides, in phosphorus-containing anhydrides;nucleoside-triphosphatase activity;nucleotide binding;purine nucleotide binding;purine ribonucleoside triphosphate binding;purine ribonucleo…	cell part;cytoplasmic part;cytoskeletal part;cytosol;endomembrane system;Golgi apparatus;intracellular membrane-bounded organelle;intracellular organelle;intracellular organelle part;intracellular part;macromolecular complex;membrane;membrane-bounded organelle;microbody;microtubule;mitochondrial membrane;mitochondrial outer membrane;mitochondrial part;organelle;organelle membrane;organelle outer …	anatomical structure morphogenesis;biological regulation;catabolic process;cellular component assembly;cellular component morphogenesis;cellular component organization;cellular macromolecular complex assembly;cellular membrane organization;cellular metabolic process;cellular nitrogen compound metabolic process;cellular process;developmental process;heterocycle metabolic process;macromolecular com…	cell part;cytosol;endomembrane system;Golgi apparatus;intracellular membrane-bounded organelle;intracellular organelle;macromolecular complex;membrane;microbody;organelle;peroxisome;protein complex	Bacterial invasion of epithelial cells;Endocrine and other factor-regulated calcium reabsorption;Endocytosis;Fc gamma R-mediated phagocytosis	Dynamin_M;Dynamin_N;GED	ACTAYRNNNCCCR_UNKNOWN;APOPTOSIS_GO;APOPTOTIC_MITOCHONDRIAL_CHANGES;APOPTOTIC_PROGRAM;BAELDE_DIABETIC_NEPHROPATHY_DN;BLALOCK_ALZHEIMERS_DISEASE_DN;BOYLAN_MULTIPLE_MYELOMA_PCA3_DN;BRUINS_UVC_RESPONSE_VIA_TP53_GROUP_D;CASORELLI_ACUTE_PROMYELOCYTIC_LEUKEMIA_DN;CELL_DEVELOPMENT;chr12p;CYCLIN_D1_KE_.V1_DN;CYTOPLASM;CYTOPLASMIC_PART;DIAZ_CHRONIC_MEYLOGENOUS_LEUKEMIA_UP;DODD_NASOPHARYNGEAL_CARCINOMA_DN;E…	Alternativesplicing;Completeproteome;Cytoplasm;Directproteinsequencing;Glycoprotein;Golgiapparatus;GTP-binding;Hydrolase;Isopeptidebond;Membrane;Mitochondrion;Mitochondrionoutermembrane;Necrosis;Nucleotide-binding;Phosphoprotein;Referenceproteome;S-nitrosylation;Ublconjugation		GO:0000266;GO:0003373;GO:0003374;GO:0006139;GO:0006163;GO:0006184;GO:0006195;GO:0006461;GO:0006753;GO:0006807;GO:0006996;GO:0007005;GO:0008152;GO:0008637;GO:0009056;GO:0009117;GO:0009141;GO:0009143;GO:0009144;GO:0009146;GO:0009150;GO:0009154;GO:0009166;GO:0009199;GO:0009203;GO:0009205;GO:0009207;GO:0009259;GO:0009261;GO:0009653;GO:0009987;GO:0010638;GO:0010821;GO:0010822;GO:0010941;GO:0016043;GO:…	GO:0000166;GO:0003824;GO:0003924;GO:0005488;GO:0005525;GO:0016462;GO:0016787;GO:0016817;GO:0016818;GO:0017076;GO:0017111;GO:0019001;GO:0032553;GO:0032555;GO:0032561;GO:0035639	GO:0005741;GO:0005777;GO:0005794;GO:0005829;GO:0005874;GO:0012505;GO:0016020;GO:0019867;GO:0031090;GO:0031966;GO:0031968;GO:0032991;GO:0042579;GO:0043226;GO:0043227;GO:0043229;GO:0043231;GO:0043234;GO:0044422;GO:0044424;GO:0044429;GO:0044430;GO:0044444;GO:0044446;GO:0044464;GO:0048471	GO:0006139;GO:0006461;GO:0006807;GO:0006996;GO:0007005;GO:0008152;GO:0009056;GO:0009117;GO:0009653;GO:0009987;GO:0016043;GO:0016044;GO:0022607;GO:0032502;GO:0032989;GO:0033043;GO:0034622;GO:0034641;GO:0034655;GO:0044237;GO:0044238;GO:0044281;GO:0046483;GO:0048285;GO:0051049;GO:0051258;GO:0055086;GO:0061024;GO:0065003;GO:0065007	GO:0005777;GO:0005794;GO:0005829;GO:0012505;GO:0016020;GO:0032991;GO:0042579;GO:0043226;GO:0043229;GO:0043231;GO:0043234;GO:0044464			7.2927e-32	1206400000	0.0353003	0.079882	0.0419898	E9PUD2;Q8K1M6	E9PUD2;Q8K1M6	Dynamin-1-like protein	Dnm1l
25.4453	23.7917	26.9666	22.6497	25.425	26.6241	24.5194	23.5267	23.5441	23.5013	24.3779	24.2961				anatomical structure morphogenesis;biological regulation;developmental process;embryonic morphogenesis;gastrulation;gastrulation with mouth forming second;negative regulation of biological process;negative regulation of cell adhesion;negative regulation of cellular process;regulation of biological process;regulation of cell adhesion;regulation of cellular process	acetyltransferase activity;catalytic activity;N-acetyltransferase activity;N-acyltransferase activity;transferase activity;transferase activity, transferring acyl groups;transferase activity, transferring acyl groups other than amino-acyl groups	cell part;cytoplasmic part;endoplasmic reticulum;Golgi apparatus;integral to membrane;intracellular membrane-bounded organelle;intracellular organelle;intracellular organelle part;intracellular part;intrinsic to membrane;membrane;membrane part;membrane-bounded organelle;mitochondrial inner membrane;mitochondrial membrane;mitochondrial part;organelle;organelle inner membrane;organelle membrane;org…	anatomical structure morphogenesis;biological regulation;developmental process	cell part;endoplasmic reticulum;Golgi apparatus;intracellular membrane-bounded organelle;intracellular organelle;membrane;organelle		Acetyltransf_1		Acyltransferase;Completeproteome;Developmentalprotein;Gastrulation;Membrane;Phosphoprotein;Referenceproteome;Transferase;Transmembrane;Transmembranehelix		GO:0001702;GO:0007162;GO:0007369;GO:0009653;GO:0030155;GO:0032502;GO:0048519;GO:0048523;GO:0048598;GO:0050789;GO:0050794;GO:0065007	GO:0003824;GO:0008080;GO:0016407;GO:0016410;GO:0016740;GO:0016746;GO:0016747	GO:0005743;GO:0005783;GO:0005794;GO:0016020;GO:0016021;GO:0019866;GO:0031090;GO:0031224;GO:0031966;GO:0043226;GO:0043227;GO:0043229;GO:0043231;GO:0044422;GO:0044424;GO:0044425;GO:0044429;GO:0044444;GO:0044446;GO:0044464	GO:0009653;GO:0032502;GO:0065007	GO:0005783;GO:0005794;GO:0016020;GO:0043226;GO:0043229;GO:0043231;GO:0044464			2.7363e-06	414350000	0.643396	0.771396	1.09396	G3UWY7;Q9JIZ0;E9PUL7	G3UWY7;Q9JIZ0;E9PUL7	Probable N-acetyltransferase CML1	Cml1
23.8595	24.507	23.855	23.8766	23.624	22.9018	23.589	23.9423	24.6202	23.6663	23.9431	24.1933				biological adhesion;biological regulation;cell adhesion;cellular component organization;cellular component organization at cellular level;cellular component organization or biogenesis;cellular component organization or biogenesis at cellular level;cellular process;cytoskeletal anchoring at plasma membrane;cytoskeleton organization;maintenance of location;maintenance of location in cell;maintenanc…	structural constituent of cytoskeleton;structural molecule activity	actin cytoskeleton;adherens junction;anchoring junction;cell junction;cell part;cell projection;cell-cell adherens junction;cell-cell junction;cell-substrate adherens junction;cell-substrate junction;cytoplasm;cytoskeleton;fascia adherens;focal adhesion;intracellular non-membrane-bounded organelle;intracellular organelle;intracellular part;membrane;non-membrane-bounded organelle;organelle;plasma …	biological adhesion;biological regulation;cell adhesion;cellular component organization;cellular process;cytoskeleton organization;organelle organization	cell part;cell projection;cytoplasm;cytoskeleton;intracellular non-membrane-bounded organelle;intracellular organelle;membrane;organelle;plasma membrane;synapse	Focal adhesion	FERM_M;FERM_N;I_LWEQ;IRS;Talin_middle;VBS	ACEVEDO_FGFR1_TARGETS_IN_PROSTATE_CANCER_MODEL_DN;AGCTCCT,MIR-28;AGGGCAG,MIR-18A;BACOLOD_RESISTANCE_TO_ALKYLATING_AGENTS_DN;BCAT.100_UP.V1_DN;BERTUCCI_MEDULLARY_VS_DUCTAL_BREAST_CANCER_DN;BOYLAN_MULTIPLE_MYELOMA_D_UP;BOYLAN_MULTIPLE_MYELOMA_PCA3_UP;BRUINS_UVC_RESPONSE_LATE;CAGTATT,MIR-200B,MIR-200C,MIR-429;CAMP_UP.V1_DN;CELLULAR_COMPONENT_ASSEMBLY;chr15q15;CTGTTAC,MIR-194;CTTGTAT,MIR-381;CYTOPLAS…	3D-structure;Celljunction;Cellmembrane;Completeproteome;Cytoplasm;Cytoskeleton;Membrane;Phosphoprotein;Referenceproteome;Synapse		GO:0006996;GO:0007010;GO:0007016;GO:0007155;GO:0009987;GO:0016043;GO:0022610;GO:0032507;GO:0045185;GO:0051235;GO:0051651;GO:0065007;GO:0065008;GO:0071840;GO:0071841;GO:0071842	GO:0005198;GO:0005200	GO:0001726;GO:0005737;GO:0005856;GO:0005886;GO:0005911;GO:0005912;GO:0005913;GO:0005916;GO:0005924;GO:0005925;GO:0015629;GO:0016020;GO:0030054;GO:0030055;GO:0042995;GO:0043226;GO:0043228;GO:0043229;GO:0043232;GO:0044424;GO:0044464;GO:0045202;GO:0070161	GO:0006996;GO:0007010;GO:0007155;GO:0009987;GO:0016043;GO:0022610;GO:0065007	GO:0005737;GO:0005856;GO:0005886;GO:0016020;GO:0042995;GO:0043226;GO:0043229;GO:0043232;GO:0044464;GO:0045202			5.6648e-27	92387000	-0.455579	1.02385	-0.591481	E9PUM4;Q71LX4	E9PUM4;Q71LX4	Talin-2	Tln2
28.4719	28.072	26.6557	27.6438	26.6551	26.6263	27.7546	25.9832	28.0117	27.5975	25.2003	27.4956				biological regulation;biosynthetic process;cell differentiation;cellular biosynthetic process;cellular component assembly;cellular component organization;cellular component organization or biogenesis;cellular developmental process;cellular metabolic process;cellular nitrogen compound biosynthetic process;cellular nitrogen compound metabolic process;cellular process;cofactor biosynthetic process;c…	angiostatin binding;ATPase binding;ATPase inhibitor activity;ATPase regulator activity;binding;calmodulin binding;enzyme binding;enzyme inhibitor activity;enzyme regulator activity;identical protein binding;nucleoside-triphosphatase regulator activity;protein binding;protein dimerization activity;protein homodimerization activity	cell part;cell surface;cytoplasmic part;intracellular membrane-bounded organelle;intracellular organelle;intracellular organelle part;intracellular part;macromolecular complex;membrane part;membrane-bounded organelle;mitochondrial membrane part;mitochondrial part;mitochondrial proton-transporting ATP synthase complex;mitochondrion;organelle;organelle part;protein complex;proton-transporting ATP s…	biological regulation;biosynthetic process;cell differentiation;cellular component assembly;cellular component organization;cellular metabolic process;cellular nitrogen compound metabolic process;cellular process;cofactor metabolic process;developmental process;heterocycle metabolic process;macromolecular complex assembly;metabolic process;nitrogen compound metabolic process;pigment metabolic pro…	cell part;cell surface;intracellular membrane-bounded organelle;intracellular organelle;macromolecular complex;mitochondrion;organelle;protein complex;proton-transporting two-sector ATPase complex		IATP	AAAYRNCTG_UNKNOWN;ANATOMICAL_STRUCTURE_DEVELOPMENT;ANATOMICAL_STRUCTURE_FORMATION;ANATOMICAL_STRUCTURE_MORPHOGENESIS;ANGIOGENESIS;AUNG_GASTRIC_CANCER;BENPORATH_NANOG_TARGETS;BLALOCK_ALZHEIMERS_DISEASE_DN;CALMODULIN_BINDING;CASORELLI_ACUTE_PROMYELOCYTIC_LEUKEMIA_DN;CELL_PROLIFERATION_GO_0008283;CELL_SURFACE;CELLULAR_COMPONENT_ASSEMBLY;chr1p35;COLDREN_GEFITINIB_RESISTANCE_DN;CYTOPLASM;CYTOPLASMIC_P…	Coiledcoil;Completeproteome;Mitochondrion;Referenceproteome;Transitpeptide		GO:0001936;GO:0001937;GO:0006140;GO:0006461;GO:0006778;GO:0006779;GO:0006783;GO:0006807;GO:0008152;GO:0008285;GO:0009058;GO:0009892;GO:0009987;GO:0010941;GO:0016043;GO:0018130;GO:0019219;GO:0019222;GO:0022607;GO:0030099;GO:0030154;GO:0030218;GO:0031323;GO:0031324;GO:0032502;GO:0033013;GO:0033014;GO:0034641;GO:0042127;GO:0042168;GO:0042440;GO:0042981;GO:0043067;GO:0043086;GO:0043933;GO:0044092;GO:…	GO:0004857;GO:0005488;GO:0005515;GO:0005516;GO:0019899;GO:0030234;GO:0042030;GO:0042802;GO:0042803;GO:0043532;GO:0046983;GO:0051117;GO:0060589;GO:0060590	GO:0005739;GO:0005753;GO:0009986;GO:0016469;GO:0032991;GO:0043226;GO:0043227;GO:0043229;GO:0043231;GO:0043234;GO:0044422;GO:0044424;GO:0044425;GO:0044429;GO:0044444;GO:0044446;GO:0044455;GO:0044464;GO:0045259	GO:0006461;GO:0006807;GO:0008152;GO:0009058;GO:0009987;GO:0016043;GO:0022607;GO:0030154;GO:0032502;GO:0034641;GO:0042440;GO:0044237;GO:0046483;GO:0051186;GO:0065003;GO:0065007	GO:0005739;GO:0009986;GO:0016469;GO:0032991;GO:0043226;GO:0043229;GO:0043231;GO:0043234;GO:0044464			1.1428e-46	1542000000	-0.185413	0.169617	-0.321488	E9PV44;O35143	E9PV44;O35143	ATPase inhibitor, mitochondrial	Atpif1
23.859	23.7194	22.492	24.4246	24.713	23.0774	24.3735	23.4153	24.1035	23.3902	23.8773	25.3663				biological regulation;cellular macromolecule metabolic process;cellular metabolic process;cellular nitrogen compound metabolic process;cellular process;macromolecule metabolic process;metabolic process;nitrogen compound metabolic process;nucleic acid metabolic process;nucleobase-containing compound metabolic process;posttranscriptional regulation of gene expression;primary metabolic process;regul…	binding;DNA binding;nucleic acid binding;RNA binding;translation factor activity, nucleic acid binding;translation initiation factor activity	cell part;cytoplasm;intracellular part	biological regulation;cellular metabolic process;cellular nitrogen compound metabolic process;cellular process;macromolecule metabolic process;metabolic process;nitrogen compound metabolic process;nucleobase-containing compound metabolic process;primary metabolic process;regulation of translation;RNA metabolic process	cell part;cytoplasm	RNA transport;Viral myocarditis	MA3;MIF4G;W2	AAAYWAACM_V$HFH4_01;AACTTT_UNKNOWN;ACTGCAG,MIR-17-3P;BASSO_B_LYMPHOCYTE_NETWORK;BIOCARTA_EIF_PATHWAY;BIOCARTA_EIF4_PATHWAY;BIOCARTA_MTOR_PATHWAY;BYSTROEM_CORRELATED_WITH_IL5_DN;BYSTRYKH_HEMATOPOIESIS_STEM_CELL_AND_BRAIN_QTL_TRANS;CACGTG_V$MYC_Q2;CAGGTA_V$AREB6_01;CCTGCTG,MIR-214;CGCTGCT,MIR-503;CHANG_CORE_SERUM_RESPONSE_UP;CTTTGA_V$LEF1_Q2;CTTTGT_V$LEF1_Q2;CYCLIN_D1_UP.V1_DN;CYTOPLASM;CYTOPLASMIC…	Acetylation;Alternativesplicing;Completeproteome;Initiationfactor;Phosphoprotein;Proteinbiosynthesis;Referenceproteome;RNA-binding;Translationregulation		GO:0006139;GO:0006417;GO:0006807;GO:0008152;GO:0009889;GO:0009987;GO:0010468;GO:0010556;GO:0010608;GO:0016070;GO:0019222;GO:0031323;GO:0031326;GO:0032268;GO:0034641;GO:0043170;GO:0044237;GO:0044238;GO:0044260;GO:0050789;GO:0050794;GO:0051246;GO:0060255;GO:0065007;GO:0080090;GO:0090304;GO:2000112	GO:0003676;GO:0003677;GO:0003723;GO:0003743;GO:0005488;GO:0008135	GO:0005737;GO:0044424;GO:0044464	GO:0006139;GO:0006417;GO:0006807;GO:0008152;GO:0009987;GO:0016070;GO:0034641;GO:0043170;GO:0044237;GO:0044238;GO:0065007	GO:0005737;GO:0044464			1.9283e-11	120150000	-0.184183	0.200137	-0.289523	E9PVC6;E9Q9E1;E9PVC5;Q6NZJ6;E9Q770;D3YWY7;D3YWM1;D3Z439	E9PVC6;E9Q9E1;E9PVC5;Q6NZJ6;E9Q770	Eukaryotic translation initiation factor 4 gamma 1	Eif4g1
28.5676	28.4616	28.2524	28.2999	27.8474	28.4632	28.033	28.0185	28.6395	28.7648	28.7747	28.4989				amine metabolic process;carboxylic acid metabolic process;cellular amine metabolic process;cellular amino acid metabolic process;cellular ketone metabolic process;cellular metabolic process;cellular modified amino acid metabolic process;cellular nitrogen compound metabolic process;cellular process;glutathione metabolic process;metabolic process;nitrogen compound metabolic process;organic acid met…	binding;catalytic activity;glutathione transferase activity;identical protein binding;protein binding;protein dimerization activity;protein homodimerization activity;transferase activity;transferase activity, transferring alkyl or aryl (other than methyl) groups	cell part;cytoplasm;intracellular part	amine metabolic process;cellular amino acid metabolic process;cellular ketone metabolic process;cellular metabolic process;cellular nitrogen compound metabolic process;cellular process;metabolic process;nitrogen compound metabolic process;organic acid metabolic process;peptide metabolic process;primary metabolic process;response to chemical stimulus;response to endogenous stimulus;response to sti…	cell part;cytoplasm	Drug metabolism - cytochrome P450;Glutathione metabolism;Metabolism of xenobiotics by cytochrome P450	GST_C;GST_N	BLALOCK_ALZHEIMERS_DISEASE_UP;BONOME_OVARIAN_CANCER_SURVIVAL_SUBOPTIMAL_DEBULKING;BOQUEST_STEM_CELL_UP;CHANDRAN_METASTASIS_DN;chr1p13;GLUTATHIONE_TRANSFERASE_ACTIVITY;GSE13411_PLASMA_CELL_VS_MEMORY_BCELL_UP;GSE1448_ANTI_VALPHA2_VS_VBETA5_DP_THYMOCYTE_DN;GSE17721_0.5H_VS_24H_CPG_BMDM_DN;GSE17721_4_VS_24H_CPG_BMDM_DN;GSE17721_LPS_VS_CPG_1H_BMDM_DN;GSE17721_LPS_VS_CPG_8H_BMDM_DN;GSE17721_LPS_VS_GARD…	Completeproteome;Cytoplasm;Directproteinsequencing;Referenceproteome;Transferase		GO:0006082;GO:0006518;GO:0006520;GO:0006575;GO:0006749;GO:0006790;GO:0006807;GO:0008152;GO:0009308;GO:0009719;GO:0009725;GO:0009987;GO:0010033;GO:0019752;GO:0034641;GO:0042180;GO:0042221;GO:0043436;GO:0043627;GO:0044106;GO:0044237;GO:0044238;GO:0044281;GO:0048545;GO:0050896	GO:0003824;GO:0004364;GO:0005488;GO:0005515;GO:0016740;GO:0016765;GO:0042802;GO:0042803;GO:0046983	GO:0005737;GO:0044424;GO:0044464	GO:0006082;GO:0006518;GO:0006520;GO:0006790;GO:0006807;GO:0008152;GO:0009308;GO:0009719;GO:0009987;GO:0034641;GO:0042180;GO:0042221;GO:0044237;GO:0044238;GO:0044281;GO:0050896	GO:0005737;GO:0044464		+	1.5105e-81	2503500000	-0.505082	2.12708	-0.57895	E9PVM7;P48774;E9PV63;E9Q024;E9Q5L9	E9PVM7;P48774;E9PV63	Glutathione S-transferase Mu 5	Gstm5
28.1554	27.9487	27.9136	28.1997	27.7574	28.2344	28.1865	28.2415	28.0091	27.9319	27.8075	28.3784				anatomical structure development;anatomical structure morphogenesis;auditory receptor cell differentiation;behavior;biological regulation;cell communication;cell differentiation;cell projection organization;cell-cell signaling;cellular component assembly;cellular component assembly at cellular level;cellular component organization;cellular component organization at cellular level;cellular compone…	actin binding;actin filament binding;adenyl nucleotide binding;adenyl ribonucleotide binding;ATP binding;binding;catalytic activity;cytoskeletal protein binding;hydrolase activity;hydrolase activity, acting on acid anhydrides;hydrolase activity, acting on acid anhydrides, in phosphorus-containing anhydrides;motor activity;nucleoside-triphosphatase activity;nucleotide binding;protein binding;purin…	axon;cell body;cell part;cell projection;clathrin-coated endocytic vesicle;clathrin-coated vesicle;coated pit;coated vesicle;cytoplasmic membrane-bounded vesicle;cytoplasmic part;cytoplasmic vesicle;cytoskeletal part;DNA-directed RNA polymerase II, holoenzyme;endocytic vesicle;Golgi apparatus;intracellular membrane-bounded organelle;intracellular organelle;intracellular organelle part;intracellul…	anatomical structure development;anatomical structure morphogenesis;behavior;biological regulation;cell communication;cell differentiation;cell-cell signaling;cellular component assembly;cellular component organization;cellular membrane organization;cellular process;developmental process;endocytosis;establishment of localization;membrane invagination;membrane organization;multicellular organismal…	cell body;cell part;cell projection;cytoplasmic membrane-bounded vesicle;DNA-directed RNA polymerase II, holoenzyme;Golgi apparatus;intracellular membrane-bounded organelle;intracellular organelle;macromolecular complex;membrane;neuron projection;neuronal cell body;nucleus;organelle;plasma membrane;protein complex;synapse;vesicle		Myosin_head	ACTIN_BINDING;ACTIN_CYTOSKELETON;ACTIN_FILAMENT;ACTIN_FILAMENT_BASED_MOVEMENT;ACTIN_FILAMENT_BASED_PROCESS;ACTIN_FILAMENT_BINDING;ADENYL_NUCLEOTIDE_BINDING;ADENYL_RIBONUCLEOTIDE_BINDING;ADP_BINDING;BIOPOLYMER_METABOLIC_PROCESS;BLALOCK_ALZHEIMERS_DISEASE_UP;BRUINS_UVC_RESPONSE_VIA_TP53_GROUP_B;BYSTRYKH_HEMATOPOIESIS_STEM_CELL_QTL_TRANS;CALMODULIN_BINDING;CELL_CORTEX;CELL_PROJECTION;CELLULAR_LOCALI…	3D-structure;Actin-binding;ATP-binding;Calmodulin-binding;Cellprojection;Coatedpit;Coiledcoil;Completeproteome;Cytoplasm;Cytoplasmicvesicle;Deafness;Diseasemutation;Endocytosis;Golgiapparatus;Hearing;Membrane;Motorprotein;Myosin;Nucleotide-binding;Nucleus;Phosphoprotein;Proteintransport;Referenceproteome;Transport		GO:0003008;GO:0006355;GO:0006357;GO:0006605;GO:0006810;GO:0006886;GO:0006897;GO:0006950;GO:0006974;GO:0007154;GO:0007165;GO:0007267;GO:0007268;GO:0007416;GO:0007600;GO:0007605;GO:0007610;GO:0007626;GO:0009628;GO:0009653;GO:0009889;GO:0009891;GO:0009893;GO:0009987;GO:0010324;GO:0010468;GO:0010556;GO:0010557;GO:0010604;GO:0010628;GO:0010646;GO:0014047;GO:0015031;GO:0016043;GO:0016044;GO:0016192;GO:…	GO:0000166;GO:0003774;GO:0003779;GO:0003824;GO:0005488;GO:0005515;GO:0005524;GO:0008092;GO:0016462;GO:0016787;GO:0016817;GO:0016818;GO:0017076;GO:0017111;GO:0030554;GO:0032553;GO:0032555;GO:0032559;GO:0035639;GO:0051015	GO:0001726;GO:0005634;GO:0005794;GO:0005886;GO:0005905;GO:0012506;GO:0016020;GO:0016023;GO:0016459;GO:0016591;GO:0030135;GO:0030136;GO:0030139;GO:0030424;GO:0031090;GO:0031410;GO:0031965;GO:0031982;GO:0031988;GO:0032991;GO:0042995;GO:0043005;GO:0043025;GO:0043226;GO:0043227;GO:0043229;GO:0043231;GO:0043234;GO:0044297;GO:0044422;GO:0044424;GO:0044425;GO:0044428;GO:0044430;GO:0044444;GO:0044446;GO:…	GO:0006605;GO:0006810;GO:0006897;GO:0006950;GO:0006974;GO:0007154;GO:0007165;GO:0007267;GO:0007610;GO:0009628;GO:0009653;GO:0009987;GO:0010324;GO:0015031;GO:0016043;GO:0016044;GO:0016192;GO:0022607;GO:0023052;GO:0030154;GO:0032501;GO:0032502;GO:0046903;GO:0048856;GO:0050877;GO:0050896;GO:0051049;GO:0051234;GO:0061024;GO:0065007	GO:0005634;GO:0005794;GO:0005886;GO:0016020;GO:0016023;GO:0016591;GO:0031982;GO:0032991;GO:0042995;GO:0043005;GO:0043025;GO:0043226;GO:0043229;GO:0043231;GO:0043234;GO:0044297;GO:0044464;GO:0045202			2.8123e-184	1968700000	0.0626271	0.167236	0.0732274	E9Q175;E9PVU0;E9Q3L1;E9Q174;Q64331	E9Q175;E9PVU0;E9Q3L1;E9Q174;Q64331	Unconventional myosin-VI	Myo6
26.5752	27.5744	26.0647	27.0389	26.3867	23.9758	23.495	24.168	26.277	25.4036	23.5989	24.3932				cellular component assembly;cellular component assembly at cellular level;cellular component organization;cellular component organization at cellular level;cellular component organization or biogenesis;cellular component organization or biogenesis at cellular level;cellular macromolecular complex assembly;cellular macromolecular complex subunit organization;cellular process;chromatin organization…		cell part;cytoplasmic membrane-bounded vesicle;cytoplasmic part;cytoplasmic vesicle;intracellular membrane-bounded organelle;intracellular organelle;intracellular part;melanosome;membrane-bounded organelle;membrane-bounded vesicle;nucleus;organelle;pigment granule;vesicle	cellular component assembly;cellular component organization;cellular macromolecular complex assembly;cellular process;chromatin organization;chromosome organization;macromolecular complex assembly;organelle organization	cell part;cytoplasmic membrane-bounded vesicle;intracellular membrane-bounded organelle;intracellular organelle;nucleus;organelle;vesicle		NAP	AACTGGA,MIR-145;AATGTGA,MIR-23A,MIR-23B;ACCAAAG,MIR-9;ACTACCT,MIR-196A,MIR-196B;ATACCTC,MIR-202;BIDUS_METASTASIS_UP;BILANGES_RAPAMYCIN_SENSITIVE_VIA_TSC1_AND_TSC2;BILANGES_SERUM_SENSITIVE_GENES;BIOPOLYMER_METABOLIC_PROCESS;BLALOCK_ALZHEIMERS_DISEASE_INCIPIENT_UP;BLALOCK_ALZHEIMERS_DISEASE_UP;BORCZUK_MALIGNANT_MESOTHELIOMA_UP;BOYAULT_LIVER_CANCER_SUBCLASS_G1_UP;BOYERINAS_ONCOFETAL_TARGETS_OF_LET7A…	Acetylation;Completeproteome;Directproteinsequencing;Lipoprotein;Methylation;Nucleus;Phosphoprotein;Prenylation;Referenceproteome		GO:0006325;GO:0006334;GO:0006996;GO:0009987;GO:0016043;GO:0022607;GO:0034621;GO:0034622;GO:0034728;GO:0043933;GO:0051276;GO:0065003;GO:0065004;GO:0071824;GO:0071840;GO:0071841;GO:0071842;GO:0071844		GO:0005634;GO:0016023;GO:0031410;GO:0031982;GO:0031988;GO:0042470;GO:0043226;GO:0043227;GO:0043229;GO:0043231;GO:0044424;GO:0044444;GO:0044464;GO:0048770	GO:0006325;GO:0006996;GO:0009987;GO:0016043;GO:0022607;GO:0034622;GO:0051276;GO:0065003	GO:0005634;GO:0016023;GO:0031982;GO:0043226;GO:0043229;GO:0043231;GO:0044464			1.6967e-25	669920000	-0.220378	0.18563	-0.41179	J3QP68;P28656;E9PW66	J3QP68;P28656;E9PW66	Nucleosome assembly protein 1-like 1	Gm4204;Nap1l1
22.447	22.2995	27.1984	24.439	23.9496	27.1461	23.3841	26.6756	23.66	24.1408	27.214	26.7077				catabolic process;cellular catabolic process;cellular macromolecule catabolic process;cellular macromolecule metabolic process;cellular metabolic process;cellular process;macromolecule catabolic process;macromolecule metabolic process;metabolic process;modification-dependent macromolecule catabolic process;modification-dependent protein catabolic process;primary metabolic process;protein metaboli…	catalytic activity;endopeptidase activity;hydrolase activity;peptidase activity;peptidase activity, acting on L-amino acid peptides;threonine-type endopeptidase activity;threonine-type peptidase activity	cell part;cytoplasm;cytoplasmic mRNA processing body;cytoplasmic part;cytosol;intracellular membrane-bounded organelle;intracellular non-membrane-bounded organelle;intracellular organelle;intracellular part;macromolecular complex;membrane-bounded organelle;non-membrane-bounded organelle;nucleus;organelle;proteasome core complex;proteasome core complex, alpha-subunit complex;protein complex;ribonu…	catabolic process;cellular metabolic process;cellular process;macromolecule metabolic process;metabolic process;primary metabolic process;protein metabolic process;proteolysis;proteolysis involved in cellular protein catabolic process	cell part;cytoplasm;cytosol;intracellular membrane-bounded organelle;intracellular non-membrane-bounded organelle;intracellular organelle;macromolecular complex;nucleus;organelle;protein complex;ribonucleoprotein complex	Proteasome	Proteasome;Proteasome_A_N	BIOCARTA_PROTEASOME_PATHWAY;BRUINS_UVC_RESPONSE_LATE;chr15q24;DIAZ_CHRONIC_MEYLOGENOUS_LEUKEMIA_UP;DODD_NASOPHARYNGEAL_CARCINOMA_DN;FLECHNER_BIOPSY_KIDNEY_TRANSPLANT_OK_VS_DONOR_UP;FLECHNER_PBL_KIDNEY_TRANSPLANT_OK_VS_DONOR_UP;GGGCGGR_V$SP1_Q6;GNF2_NS;GNF2_PA2G4;GNF2_RAN;GNF2_XRCC5;GSE10856_CTRL_VS_TNFRSF6B_IN_MACROPHAGE_DN;GSE12366_GC_VS_MEMORY_BCELL_UP;GSE12845_IGD_NEG_BLOOD_VS_NAIVE_TONSIL_BCE…	3D-structure;Acetylation;Completeproteome;Cytoplasm;Directproteinsequencing;Hydrolase;Nucleus;Phosphoprotein;Protease;Proteasome;Referenceproteome;Threonineprotease	20S proteasome;immunoproteasome	GO:0006508;GO:0006511;GO:0008152;GO:0009056;GO:0009057;GO:0009987;GO:0019538;GO:0019941;GO:0043170;GO:0043632;GO:0044237;GO:0044238;GO:0044248;GO:0044260;GO:0044265;GO:0051603	GO:0003824;GO:0004175;GO:0004298;GO:0008233;GO:0016787;GO:0070003;GO:0070011	GO:0000932;GO:0005634;GO:0005737;GO:0005829;GO:0005839;GO:0019773;GO:0030529;GO:0032991;GO:0035770;GO:0043226;GO:0043227;GO:0043228;GO:0043229;GO:0043231;GO:0043232;GO:0043234;GO:0044424;GO:0044444;GO:0044464	GO:0006508;GO:0008152;GO:0009056;GO:0009987;GO:0019538;GO:0043170;GO:0044237;GO:0044238;GO:0051603	GO:0005634;GO:0005737;GO:0005829;GO:0030529;GO:0032991;GO:0043226;GO:0043229;GO:0043231;GO:0043232;GO:0043234;GO:0044464			3.9175e-16	357490000	-0.06154	0.0376501	-0.141787	E9PW69;Q9R1P0;E9Q0X0	E9PW69;Q9R1P0;E9Q0X0	Proteasome subunit alpha type;Proteasome subunit alpha type-4	Psma4
24.2958	27.8359	27.6579	28.5808	28.259	27.2524	27.8228	27.6291	28.2083	27.9319	27.2742	27.9059				anatomical structure development;anatomical structure morphogenesis;biological regulation;cardiac muscle contraction;cardiac muscle tissue morphogenesis;developmental process;multicellular organismal process;muscle contraction;muscle system process;muscle tissue development;muscle tissue morphogenesis;regulation of biological process;regulation of biological quality;regulation of heart contractio…	binding;calcium ion binding;catalytic activity;cation binding;hydrolase activity;hydrolase activity, acting on acid anhydrides;hydrolase activity, acting on acid anhydrides, in phosphorus-containing anhydrides;ion binding;metal ion binding;motor activity;nucleoside-triphosphatase activity;pyrophosphatase activity	A band;cell part;contractile fiber;contractile fiber part;cytoplasmic part;cytoskeletal part;I band;intracellular non-membrane-bounded organelle;intracellular organelle;intracellular organelle part;intracellular part;macromolecular complex;myofibril;myosin complex;non-membrane-bounded organelle;organelle;organelle part;protein complex	anatomical structure development;anatomical structure morphogenesis;biological regulation;developmental process;multicellular organismal process;muscle contraction	cell part;intracellular non-membrane-bounded organelle;intracellular organelle;macromolecular complex;organelle;protein complex	Cardiac muscle contraction;Dilated cardiomyopathy;Hypertrophic cardiomyopathy (HCM)	EF_hand_4	AAAYWAACM_V$HFH4_01;AACTTT_UNKNOWN;ACTIN_CYTOSKELETON;AFFAR_YY1_TARGETS_UP;BILANGES_SERUM_RESPONSE_TRANSLATION;BILANGES_SERUM_SENSITIVE_GENES;BORCZUK_MALIGNANT_MESOTHELIOMA_DN;BRUINS_UVC_RESPONSE_VIA_TP53_GROUP_A;CAGCTG_V$AP4_Q5;CAGGTG_V$E12_Q6;CATTGTYY_V$SOX9_B1;CHEMELLO_SOLEUS_VS_EDL_MYOFIBERS_UP;CHEMNITZ_RESPONSE_TO_PROSTAGLANDIN_E2_DN;chr2q33;chr3p;CONTRACTILE_FIBER;CONTRACTILE_FIBER_PART;CRO…	Acetylation;Alternativesplicing;Completeproteome;Methylation;Motorprotein;Muscleprotein;Myosin;Referenceproteome;Repeat		GO:0002026;GO:0003008;GO:0003012;GO:0006936;GO:0006937;GO:0006941;GO:0006942;GO:0007519;GO:0008016;GO:0009653;GO:0009888;GO:0014706;GO:0032501;GO:0032502;GO:0044057;GO:0048729;GO:0048856;GO:0050789;GO:0051239;GO:0055008;GO:0055010;GO:0060048;GO:0060415;GO:0060537;GO:0065007;GO:0065008;GO:0090257	GO:0003774;GO:0003824;GO:0005488;GO:0005509;GO:0016462;GO:0016787;GO:0016817;GO:0016818;GO:0017111;GO:0043167;GO:0043169;GO:0046872	GO:0016459;GO:0030016;GO:0031672;GO:0031674;GO:0032991;GO:0043226;GO:0043228;GO:0043229;GO:0043232;GO:0043234;GO:0043292;GO:0044422;GO:0044424;GO:0044430;GO:0044444;GO:0044446;GO:0044449;GO:0044464	GO:0006936;GO:0009653;GO:0032501;GO:0032502;GO:0048856;GO:0065007	GO:0032991;GO:0043226;GO:0043229;GO:0043232;GO:0043234;GO:0044464			1.371e-28	1566300000	-0.0692823	0.115162	-0.0892262	E9PWG4;P05977;P09542	E9PWG4;P05977;P09542	Myosin light chain 1/3, skeletal muscle isoform;Myosin light chain 3	Myl1;Myl3
26.7201	27.0419	26.0521	25.9612	26.3279	25.851	25.8354	24.2681	26.3934	25.7734	25.9226	23.8987				amine catabolic process;amine metabolic process;aspartate family amino acid catabolic process;aspartate family amino acid metabolic process;biosynthetic process;carboxylic acid catabolic process;carboxylic acid metabolic process;catabolic process;cellular amine metabolic process;cellular amino acid catabolic process;cellular amino acid metabolic process;cellular catabolic process;cellular ketone …	acetyltransferase activity;binding;C-acetyltransferase activity;C-acyltransferase activity;catalytic activity;cofactor binding;glycine C-acetyltransferase activity;pyridoxal phosphate binding;transferase activity;transferase activity, transferring acyl groups;transferase activity, transferring acyl groups other than amino-acyl groups;vitamin B6 binding;vitamin binding	cell part;cytoplasmic part;intracellular membrane-bounded organelle;intracellular organelle;intracellular part;membrane-bounded organelle;mitochondrion;nucleus;organelle	amine metabolic process;biosynthetic process;catabolic process;cellular amino acid metabolic process;cellular ketone metabolic process;cellular metabolic process;cellular nitrogen compound metabolic process;cellular process;metabolic process;nitrogen compound metabolic process;organic acid metabolic process;primary metabolic process;small molecule metabolic process	cell part;intracellular membrane-bounded organelle;intracellular organelle;mitochondrion;nucleus;organelle	Glycine, serine and threonine metabolism	Aminotran_1_2	AACTTT_UNKNOWN;AGUIRRE_PANCREATIC_CANCER_COPY_NUMBER_DN;BOCHKIS_FOXA2_TARGETS;CAGCTG_V$AP4_Q5;CAIRO_LIVER_DEVELOPMENT_DN;chr22q12;CTTTAAR_UNKNOWN;DACOSTA_UV_RESPONSE_VIA_ERCC3_UP;DELYS_THYROID_CANCER_DN;DEURIG_T_CELL_PROLYMPHOCYTIC_LEUKEMIA_UP;ENK_UV_RESPONSE_KERATINOCYTE_DN;FOSTER_KDM1A_TARGETS_DN;GOLDRATH_ANTIGEN_RESPONSE;GOLDRATH_NAIVE_VS_EFF_CD8_TCELL_DN;GOLDRATH_NAIVE_VS_MEMORY_CD8_TCELL_DN;…	Acyltransferase;Completeproteome;Mitochondrion;Nucleus;Pyridoxalphosphate;Referenceproteome;Transferase;Transitpeptide		GO:0006082;GO:0006520;GO:0006566;GO:0006567;GO:0006807;GO:0008152;GO:0009056;GO:0009058;GO:0009063;GO:0009066;GO:0009068;GO:0009308;GO:0009310;GO:0009987;GO:0016054;GO:0019518;GO:0019752;GO:0034641;GO:0042180;GO:0043436;GO:0044106;GO:0044237;GO:0044238;GO:0044248;GO:0044281;GO:0044282;GO:0046395	GO:0003824;GO:0005488;GO:0008890;GO:0016407;GO:0016408;GO:0016453;GO:0016740;GO:0016746;GO:0016747;GO:0019842;GO:0030170;GO:0048037;GO:0070279	GO:0005634;GO:0005739;GO:0043226;GO:0043227;GO:0043229;GO:0043231;GO:0044424;GO:0044444;GO:0044464	GO:0006082;GO:0006520;GO:0006807;GO:0008152;GO:0009056;GO:0009058;GO:0009308;GO:0009987;GO:0034641;GO:0042180;GO:0044237;GO:0044238;GO:0044281	GO:0005634;GO:0005739;GO:0043226;GO:0043229;GO:0043231;GO:0044464			4.2655e-42	502240000	0.0430327	0.0358465	0.0735488	E9PWY6;O88986	E9PWY6;O88986	2-amino-3-ketobutyrate coenzyme A ligase, mitochondrial	Gcat
25.4216	26.3972	26.5945	27.0534	27.0714	26.5281	26.5157	27.6407	26.8706	27.2196	27.7542	27.0859				amine metabolic process;amino acid activation;carboxylic acid metabolic process;cellular amine metabolic process;cellular amino acid metabolic process;cellular ketone metabolic process;cellular macromolecule metabolic process;cellular metabolic process;cellular nitrogen compound metabolic process;cellular process;macromolecule metabolic process;metabolic process;ncRNA metabolic process;nitrogen c…	adenyl nucleotide binding;adenyl ribonucleotide binding;aminoacyl-tRNA ligase activity;ATP binding;binding;catalytic activity;ligase activity;ligase activity, forming aminoacyl-tRNA and related compounds;ligase activity, forming carbon-oxygen bonds;nucleic acid binding;nucleotide binding;phenylalanine-tRNA ligase activity;purine nucleotide binding;purine ribonucleoside triphosphate binding;purine…	cell part;cytoplasm;intracellular part	amine metabolic process;cellular amino acid metabolic process;cellular ketone metabolic process;cellular metabolic process;cellular nitrogen compound metabolic process;cellular process;macromolecule metabolic process;metabolic process;nitrogen compound metabolic process;nucleobase-containing compound metabolic process;organic acid metabolic process;primary metabolic process;RNA metabolic process;…	cell part;cytoplasm	Aminoacyl-tRNA biosynthesis	HTH_11;tRNA-synt_2d	ALFANO_MYC_TARGETS;AMIT_EGF_RESPONSE_240_HELA;BENPORATH_EED_TARGETS;BENPORATH_NANOG_TARGETS;BENPORATH_SOX2_TARGETS;BILD_MYC_ONCOGENIC_SIGNATURE;BONOME_OVARIAN_CANCER_SURVIVAL_SUBOPTIMAL_DEBULKING;BUYTAERT_PHOTODYNAMIC_THERAPY_STRESS_DN;CAIRO_HEPATOBLASTOMA_CLASSES_UP;CELL_FRACTION;CHANG_CORE_SERUM_RESPONSE_UP;CHIANG_LIVER_CANCER_SUBCLASS_UNANNOTATED_DN;chr19p13;CSR_LATE_UP.V1_UP;CYTOPLASM;DAIRKEE…	Acetylation;Aminoacyl-tRNAsynthetase;ATP-binding;Completeproteome;Cytoplasm;Ligase;Nucleotide-binding;Phosphoprotein;Proteinbiosynthesis;Referenceproteome		GO:0006082;GO:0006139;GO:0006399;GO:0006418;GO:0006432;GO:0006520;GO:0006807;GO:0008152;GO:0009308;GO:0009987;GO:0016070;GO:0019752;GO:0034641;GO:0034660;GO:0042180;GO:0043038;GO:0043039;GO:0043170;GO:0043436;GO:0044106;GO:0044237;GO:0044238;GO:0044260;GO:0044281;GO:0090304	GO:0000049;GO:0000166;GO:0003676;GO:0003723;GO:0003824;GO:0004812;GO:0004826;GO:0005488;GO:0005524;GO:0016874;GO:0016875;GO:0016876;GO:0017076;GO:0030554;GO:0032553;GO:0032555;GO:0032559;GO:0035639	GO:0005737;GO:0044424;GO:0044464	GO:0006082;GO:0006139;GO:0006399;GO:0006418;GO:0006520;GO:0006807;GO:0008152;GO:0009308;GO:0009987;GO:0016070;GO:0034641;GO:0042180;GO:0043170;GO:0044237;GO:0044238;GO:0044281	GO:0005737;GO:0044464			4.1742e-19	739180000	-0.221227	0.393779	-0.293559	E9PWY9;Q8C0C7;D6RIJ2	E9PWY9;Q8C0C7	Phenylalanine--tRNA ligase alpha subunit	Farsa
30.0692	30.0005	29.6745	30.04	29.6324	29.8862	29.928	29.4966	30.1066	29.8502	29.8403	30.3465				activation of JUN kinase activity;activation of MAPK activity;anatomical structure development;anatomical structure morphogenesis;apoptosis;biological regulation;cell death;cell differentiation;cell morphogenesis;cell morphogenesis involved in differentiation;cell surface receptor linked signaling pathway;cellular component assembly;cellular component assembly at cellular level;cellular component…	AP-2 adaptor complex binding;binding;binding, bridging;cargo receptor activity;clathrin adaptor activity;clathrin binding;integrin binding;lipid binding;phosphatidylinositol binding;phosphatidylinositol-4,5-bisphosphate binding;phospholipid binding;protein binding;protein binding, bridging;protein complex binding;receptor activity;receptor binding	apical plasma membrane;cell part;clathrin coat;clathrin coat of coated pit;clathrin coated vesicle membrane;coated pit;coated vesicle membrane;cytoplasm;cytoplasmic part;cytoplasmic vesicle membrane;cytoplasmic vesicle part;intracellular membrane-bounded organelle;intracellular organelle;intracellular organelle part;intracellular part;macromolecular complex;membrane;membrane coat;membrane part;me…	anatomical structure development;anatomical structure morphogenesis;biological regulation;cell death;cell differentiation;cell morphogenesis;cellular component assembly;cellular component morphogenesis;cellular component organization;cellular macromolecular complex assembly;cellular membrane organization;cellular metabolic process;cellular process;death;developmental process;embryo development;en…	cell part;cytoplasm;intracellular membrane-bounded organelle;intracellular organelle;macromolecular complex;membrane;nucleus;organelle;protein complex;receptor complex	Endocytosis	PID	ALFANO_MYC_TARGETS;BIDUS_METASTASIS_DN;BILD_MYC_ONCOGENIC_SIGNATURE;BOYAULT_LIVER_CANCER_SUBCLASS_G5_DN;BROWN_MYELOID_CELL_DEVELOPMENT_UP;BROWNE_HCMV_INFECTION_12HR_DN;BRUINS_UVC_RESPONSE_VIA_TP53_GROUP_A;BURTON_ADIPOGENESIS_PEAK_AT_0HR;CAGCTTT,MIR-320;CELL_PROLIFERATION_GO_0008283;CHANG_CORE_SERUM_RESPONSE_DN;CHARAFE_BREAST_CANCER_LUMINAL_VS_MESENCHYMAL_DN;CHIARADONNA_NEOPLASTIC_TRANSFORMATION_C…	3D-structure;Alternativesplicing;Apoptosis;Coatedpit;Completeproteome;Cytoplasm;Cytoplasmicvesicle;Developmentalprotein;Differentiation;Endocytosis;Membrane;Nucleus;Phosphoprotein;Proteintransport;Referenceproteome;Transport;Wntsignalingpathway		GO:0000187;GO:0000902;GO:0000904;GO:0001701;GO:0001919;GO:0001921;GO:0001932;GO:0001934;GO:0003008;GO:0006355;GO:0006357;GO:0006461;GO:0006464;GO:0006468;GO:0006793;GO:0006796;GO:0006810;GO:0006897;GO:0006901;GO:0006907;GO:0006915;GO:0006996;GO:0007165;GO:0007166;GO:0007257;GO:0007492;GO:0007588;GO:0008152;GO:0008219;GO:0009653;GO:0009719;GO:0009790;GO:0009792;GO:0009888;GO:0009889;GO:0009890;GO:…	GO:0004872;GO:0005102;GO:0005178;GO:0005488;GO:0005515;GO:0005543;GO:0005546;GO:0008289;GO:0030276;GO:0030674;GO:0032403;GO:0035091;GO:0035612;GO:0035615;GO:0038024;GO:0060090	GO:0005634;GO:0005737;GO:0005905;GO:0012506;GO:0016020;GO:0016324;GO:0030117;GO:0030118;GO:0030132;GO:0030659;GO:0030662;GO:0030665;GO:0031090;GO:0032991;GO:0043226;GO:0043227;GO:0043229;GO:0043231;GO:0043234;GO:0043235;GO:0044422;GO:0044424;GO:0044425;GO:0044433;GO:0044444;GO:0044446;GO:0044459;GO:0044464;GO:0070022	GO:0000902;GO:0006461;GO:0006464;GO:0006468;GO:0006793;GO:0006810;GO:0006897;GO:0006996;GO:0007165;GO:0007588;GO:0008152;GO:0008219;GO:0009653;GO:0009719;GO:0009790;GO:0009987;GO:0010324;GO:0015031;GO:0016043;GO:0016044;GO:0016050;GO:0016192;GO:0016265;GO:0019538;GO:0022607;GO:0030154;GO:0031399;GO:0032501;GO:0032502;GO:0032989;GO:0034622;GO:0042221;GO:0043170;GO:0043412;GO:0044237;GO:0044238;GO:…	GO:0005634;GO:0005737;GO:0016020;GO:0032991;GO:0043226;GO:0043229;GO:0043231;GO:0043234;GO:0043235;GO:0044464			6.5326e-86	7696500000	-0.25902	0.96964	-0.300086	E9PX84;Q3TRE6;E9QL31;P98078;F6TQN9;Q9DCE6;E0CXT5;E0CZ53;E0CYJ2	E9PX84;Q3TRE6;E9QL31;P98078;F6TQN9;Q9DCE6;E0CXT5	Disabled homolog 2	Dab2
25.9662	26.2545	26.2034	26.0886	25.36	23.4062	25.5517	25.8364	25.8065	26.6815	25.6012	25.7694				biological regulation;cell redox homeostasis;cellular homeostasis;cellular process;glycerol ether metabolic process;homeostatic process;metabolic process;organic ether metabolic process;regulation of biological process;regulation of biological quality;regulation of cellular process;small molecule metabolic process	catalytic activity;disulfide oxidoreductase activity;electron carrier activity;isomerase activity;oxidoreductase activity;oxidoreductase activity, acting on a sulfur group of donors;protein disulfide oxidoreductase activity	cell part;cytoplasmic part;endoplasmic reticulum lumen;endoplasmic reticulum part;intracellular organelle lumen;intracellular organelle part;intracellular part;membrane-enclosed lumen;organelle lumen;organelle part	biological regulation;cellular homeostasis;cellular process;glycerol ether metabolic process;homeostatic process;metabolic process;small molecule metabolic process	cell part	Protein processing in endoplasmic reticulum	Thioredoxin	ACCAAAG,MIR-9;ANTI_APOPTOSIS;APOPTOSIS_GO;BENPORATH_NANOG_TARGETS;CELL_DEVELOPMENT;chr6p24;CYTOPLASM;CYTOPLASMIC_PART;ENDOPLASMIC_RETICULUM;FIGUEROA_AML_METHYLATION_CLUSTER_5_DN;GOLDRATH_NAIVE_VS_MEMORY_CD8_TCELL_DN;GSE17721_12H_VS_24H_POLYIC_BMDM_UP;GSE17721_CPG_VS_GARDIQUIMOD_4H_BMDM_DN;GSE17721_CTRL_VS_CPG_4H_BMDM_UP;GSE17721_CTRL_VS_GARDIQUIMOD_24H_BMDM_DN;GSE17721_CTRL_VS_GARDIQUIMOD_6H_BMDM…	Completeproteome;Directproteinsequencing;Disulfidebond;Endoplasmicreticulum;Redox-activecenter;Referenceproteome;Repeat;Signal		GO:0006662;GO:0008152;GO:0009987;GO:0018904;GO:0019725;GO:0042592;GO:0044281;GO:0045454;GO:0050789;GO:0050794;GO:0065007;GO:0065008	GO:0003824;GO:0009055;GO:0015035;GO:0015036;GO:0016491;GO:0016667;GO:0016853	GO:0005788;GO:0031974;GO:0043233;GO:0044422;GO:0044424;GO:0044432;GO:0044444;GO:0044446;GO:0044464;GO:0070013	GO:0006662;GO:0008152;GO:0009987;GO:0019725;GO:0042592;GO:0044281;GO:0065007	GO:0044464			3.806e-25	449620000	-0.577358	0.754274	-0.926052	E9PXX7;Q91W90	E9PXX7;Q91W90	Thioredoxin domain-containing protein 5	Txndc5
28.3018	27.8823	27.8646	28.4227	28.2045	27.8459	28.4715	27.6591	28.1851	28.2135	27.212	28.182				amine biosynthetic process;amine metabolic process;biosynthetic process;carboxylic acid biosynthetic process;carboxylic acid metabolic process;cellular amine metabolic process;cellular amino acid biosynthetic process;cellular amino acid metabolic process;cellular biosynthetic process;cellular ketone metabolic process;cellular metabolic process;cellular modified amino acid biosynthetic process;cel…	binding;catalytic activity;cation binding;hydrolase activity;hydrolase activity, acting on ester bonds;hydroxyacylglutathione hydrolase activity;ion binding;metal ion binding;thiolester hydrolase activity;transition metal ion binding;zinc ion binding	cell part;cytoplasmic part;intracellular membrane-bounded organelle;intracellular organelle;intracellular organelle lumen;intracellular organelle part;intracellular part;membrane-bounded organelle;membrane-enclosed lumen;mitochondrial matrix;mitochondrial part;mitochondrion;organelle;organelle lumen;organelle part	amine metabolic process;biosynthetic process;cellular amino acid metabolic process;cellular ketone metabolic process;cellular metabolic process;cellular nitrogen compound metabolic process;cellular process;metabolic process;nitrogen compound metabolic process;organic acid metabolic process;peptide metabolic process;primary metabolic process;small molecule metabolic process;sulfur compound metabol…	cell part;intracellular membrane-bounded organelle;intracellular organelle;mitochondrion;organelle	Pyruvate metabolism	Lactamase_B	ACEVEDO_NORMAL_TISSUE_ADJACENT_TO_LIVER_TUMOR_DN;BANDRES_RESPONSE_TO_CARMUSTIN_MGMT_24HR_DN;BANDRES_RESPONSE_TO_CARMUSTIN_MGMT_48HR_DN;BOCHKIS_FOXA2_TARGETS;CAIRO_HEPATOBLASTOMA_DN;CAIRO_LIVER_DEVELOPMENT_DN;CCTGCTG,MIR-214;CHEN_METABOLIC_SYNDROM_NETWORK;CHIANG_LIVER_CANCER_SUBCLASS_PROLIFERATION_DN;chr16p13;CUI_TCF21_TARGETS_2_DN;CYCLIN_D1_UP.V1_UP;FEVR_CTNNB1_TARGETS_UP;FLECHNER_BIOPSY_KIDNEY_T…	Acetylation;Alternativeinitiation;Alternativesplicing;Completeproteome;Cytoplasm;Hydrolase;Metal-binding;Mitochondrion;Referenceproteome;Transitpeptide;Zinc		GO:0006082;GO:0006518;GO:0006520;GO:0006575;GO:0006749;GO:0006750;GO:0006790;GO:0006807;GO:0008152;GO:0008652;GO:0009058;GO:0009308;GO:0009309;GO:0009987;GO:0016053;GO:0019752;GO:0034641;GO:0042180;GO:0042398;GO:0043043;GO:0043436;GO:0044106;GO:0044237;GO:0044238;GO:0044249;GO:0044271;GO:0044272;GO:0044281;GO:0044283;GO:0046394	GO:0003824;GO:0004416;GO:0005488;GO:0008270;GO:0016787;GO:0016788;GO:0016790;GO:0043167;GO:0043169;GO:0046872;GO:0046914	GO:0005739;GO:0005759;GO:0031974;GO:0043226;GO:0043227;GO:0043229;GO:0043231;GO:0043233;GO:0044422;GO:0044424;GO:0044429;GO:0044444;GO:0044446;GO:0044464;GO:0070013	GO:0006082;GO:0006518;GO:0006520;GO:0006790;GO:0006807;GO:0008152;GO:0009058;GO:0009308;GO:0009987;GO:0034641;GO:0042180;GO:0044237;GO:0044238;GO:0044281	GO:0005739;GO:0043226;GO:0043229;GO:0043231;GO:0044464			8.1493e-39	2108200000	0.0743904	0.118457	0.0971088	E9PYA3;Q99KB8;G5E8T9;E9Q2H8;D3YWI0;D3YUX8	E9PYA3;Q99KB8;G5E8T9;E9Q2H8	Hydroxyacylglutathione hydrolase, mitochondrial	Hagh
26.1682	25.5965	25.9264	26.3816	25.7158	25.9466	26.1828	26.1419	26.1596	26.4026	26.0211	26.2819				alkene biosynthetic process;biosynthetic process;carboxylic acid biosynthetic process;carboxylic acid metabolic process;cellular alkene metabolic process;cellular biosynthetic process;cellular ketone metabolic process;cellular lipid metabolic process;cellular metabolic process;cellular process;fatty acid biosynthetic process;fatty acid metabolic process;icosanoid biosynthetic process;icosanoid me…	aminopeptidase activity;binding;catalytic activity;cation binding;exopeptidase activity;hydrolase activity;ion binding;metal ion binding;metallopeptidase activity;peptidase activity;peptidase activity, acting on L-amino acid peptides;transition metal ion binding;zinc ion binding	cell part;extracellular region;extracellular region part;extracellular space;membrane;plasma membrane	biosynthetic process;cellular alkene metabolic process;cellular ketone metabolic process;cellular lipid metabolic process;cellular metabolic process;cellular process;lipid metabolic process;macromolecule metabolic process;metabolic process;organic acid metabolic process;primary metabolic process;protein metabolic process;proteolysis;small molecule metabolic process	cell part;extracellular region;extracellular space;membrane;plasma membrane		Leuk-A4-hydro_C;Peptidase_M1	ACEVEDO_NORMAL_TISSUE_ADJACENT_TO_LIVER_TUMOR_DN;CEBALLOS_TARGETS_OF_TP53_AND_MYC_DN;chr1q32;EXTRACELLULAR_REGION;GRAESSMANN_APOPTOSIS_BY_DOXORUBICIN_UP;GRAESSMANN_RESPONSE_TO_MC_AND_DOXORUBICIN_UP;GSE10325_BCELL_VS_MYELOID_DN;GSE10325_CD4_TCELL_VS_MYELOID_DN;GSE10325_LUPUS_CD4_TCELL_VS_LUPUS_MYELOID_DN;GSE13411_NAIVE_VS_IGM_MEMORY_BCELL_DN;GSE17721_0.5H_VS_8H_POLYIC_BMDM_DN;GSE17721_CTRL_VS_GARD…	Acetylation;Aminopeptidase;Completeproteome;Hydrolase;Metal-binding;Metalloprotease;Protease;Referenceproteome;Secreted;Zinc		GO:0006082;GO:0006508;GO:0006629;GO:0006631;GO:0006633;GO:0006636;GO:0006690;GO:0006691;GO:0008152;GO:0008610;GO:0009058;GO:0009987;GO:0016053;GO:0019370;GO:0019538;GO:0019752;GO:0032787;GO:0033559;GO:0042180;GO:0043170;GO:0043436;GO:0043449;GO:0043450;GO:0044237;GO:0044238;GO:0044249;GO:0044255;GO:0044281;GO:0044283;GO:0046394;GO:0046456	GO:0003824;GO:0004177;GO:0005488;GO:0008233;GO:0008237;GO:0008238;GO:0008270;GO:0016787;GO:0043167;GO:0043169;GO:0046872;GO:0046914;GO:0070011	GO:0005576;GO:0005615;GO:0005886;GO:0016020;GO:0044421;GO:0044464	GO:0006082;GO:0006508;GO:0006629;GO:0008152;GO:0009058;GO:0009987;GO:0019538;GO:0042180;GO:0043170;GO:0043449;GO:0044237;GO:0044238;GO:0044255;GO:0044281	GO:0005576;GO:0005615;GO:0005886;GO:0016020;GO:0044464			1.9125e-25	498190000	-0.193506	0.812391	-0.219556	E9PYF1;Q8VCT3	E9PYF1;Q8VCT3	Aminopeptidase B	Rnpep
24.4442	24.1586	24.3171	25.182	24.1543	24.0573	24.1338	23.7584	24.6842	24.2406	22.9673	25.179				biological regulation;catabolic process;cell communication;cell-cell signaling;cellular catabolic process;cellular macromolecule catabolic process;cellular macromolecule metabolic process;cellular metabolic process;cellular process;macromolecule catabolic process;macromolecule metabolic process;metabolic process;modification-dependent macromolecule catabolic process;modification-dependent protein…	catalytic activity;cysteine-type peptidase activity;endopeptidase inhibitor activity;endopeptidase regulator activity;enzyme inhibitor activity;enzyme regulator activity;hydrolase activity;hydrolase activity, acting on ester bonds;peptidase activity;peptidase activity, acting on L-amino acid peptides;peptidase inhibitor activity;peptidase regulator activity;thiolester hydrolase activity;ubiquitin…	cell part;cell surface;cytoplasmic membrane-bounded vesicle;cytoplasmic part;cytoplasmic vesicle;intracellular membrane-bounded organelle;intracellular organelle;intracellular part;macromolecular complex;membrane;membrane-bounded organelle;membrane-bounded vesicle;organelle;plasma membrane;proteasome complex;protein complex;synapse;vesicle	biological regulation;catabolic process;cell communication;cell-cell signaling;cellular metabolic process;cellular process;macromolecule metabolic process;metabolic process;primary metabolic process;protein metabolic process;proteolysis;proteolysis involved in cellular protein catabolic process;signaling	cell part;cell surface;cytoplasmic membrane-bounded vesicle;intracellular membrane-bounded organelle;intracellular organelle;macromolecular complex;membrane;organelle;plasma membrane;proteasome complex;protein complex;synapse;vesicle		UCH	AMUNDSON_POOR_SURVIVAL_AFTER_GAMMA_RADIATION_2G;BERENJENO_TRANSFORMED_BY_RHOA_UP;BLALOCK_ALZHEIMERS_DISEASE_DN;BOYAULT_LIVER_CANCER_SUBCLASS_G3_UP;BRUINS_UVC_RESPONSE_VIA_TP53_GROUP_C;chr18p11;CYSTEINE_TYPE_ENDOPEPTIDASE_ACTIVITY;CYSTEINE_TYPE_PEPTIDASE_ACTIVITY;DIAZ_CHRONIC_MEYLOGENOUS_LEUKEMIA_UP;DODD_NASOPHARYNGEAL_CARCINOMA_DN;ENDOPEPTIDASE_ACTIVITY;ENK_UV_RESPONSE_KERATINOCYTE_DN;FEVR_CTNNB1…	3D-structure;Acetylation;Cellmembrane;Completeproteome;Cytoplasm;Hydrolase;Membrane;Phosphoprotein;Protease;Proteasome;Referenceproteome;Thiolprotease;Ublconjugationpathway		GO:0006508;GO:0006511;GO:0007154;GO:0007267;GO:0007268;GO:0008152;GO:0009056;GO:0009057;GO:0009894;GO:0009987;GO:0019222;GO:0019538;GO:0019941;GO:0023052;GO:0030162;GO:0031323;GO:0031329;GO:0032101;GO:0032268;GO:0040012;GO:0042176;GO:0043170;GO:0043632;GO:0044237;GO:0044238;GO:0044248;GO:0044260;GO:0044265;GO:0048583;GO:0050789;GO:0050794;GO:0050795;GO:0050920;GO:0051246;GO:0051603;GO:0060255;GO:…	GO:0003824;GO:0004221;GO:0004857;GO:0004866;GO:0008233;GO:0008234;GO:0016787;GO:0016788;GO:0016790;GO:0030234;GO:0030414;GO:0061134;GO:0061135;GO:0070011	GO:0000502;GO:0005886;GO:0009986;GO:0016020;GO:0016023;GO:0031410;GO:0031982;GO:0031988;GO:0032991;GO:0043226;GO:0043227;GO:0043229;GO:0043231;GO:0043234;GO:0044424;GO:0044444;GO:0044464;GO:0045202	GO:0006508;GO:0007154;GO:0007267;GO:0008152;GO:0009056;GO:0009987;GO:0019538;GO:0023052;GO:0043170;GO:0044237;GO:0044238;GO:0051603;GO:0065007	GO:0000502;GO:0005886;GO:0009986;GO:0016020;GO:0016023;GO:0031982;GO:0032991;GO:0043226;GO:0043229;GO:0043231;GO:0043234;GO:0044464;GO:0045202			7.7093e-07	187650000	-0.163108	0.197757	-0.241846	E9PYI8;Q9JMA1	E9PYI8;Q9JMA1	Ubiquitin carboxyl-terminal hydrolase;Ubiquitin carboxyl-terminal hydrolase 14	Usp14
29.2681	29.5596	29.646	29.5961	29.6302	29.7945	29.2146	29.9654	29.8982	30.1336	29.8539	29.7825				biological regulation;cell differentiation;cellular developmental process;cellular lipid metabolic process;cellular metabolic process;cellular process;cellular process involved in reproduction;cellular response to chemical stimulus;cellular response to organic substance;cellular response to stimulus;developmental growth;developmental process;developmental process involved in reproduction;epitheli…		cell part;cytoplasmic part;extracellular region part;extracellular space;Golgi apparatus;intracellular membrane-bounded organelle;intracellular organelle;intracellular part;lysosome;lytic vacuole;membrane-bounded organelle;mitochondrion;organelle;vacuole	biological regulation;cell differentiation;cellular lipid metabolic process;cellular metabolic process;cellular process;developmental process;growth;lipid metabolic process;metabolic process;primary metabolic process;response to chemical stimulus;response to stimulus	cell part;extracellular space;Golgi apparatus;intracellular membrane-bounded organelle;intracellular organelle;lysosome;mitochondrion;organelle;vacuole	Lysosome	SapA;SapB_1;SapB_2	BERENJENO_TRANSFORMED_BY_RHOA_DN;BERTUCCI_MEDULLARY_VS_DUCTAL_BREAST_CANCER_UP;BURTON_ADIPOGENESIS_8;BYSTRYKH_HEMATOPOIESIS_STEM_CELL_QTL_TRANS;CAIRO_LIVER_DEVELOPMENT_DN;CELLULAR_LIPID_METABOLIC_PROCESS;CHEN_METABOLIC_SYNDROM_NETWORK;chr10q21;CTGAGCC,MIR-24;DANG_BOUND_BY_MYC;DIRMEIER_LMP1_RESPONSE_LATE_DN;ENZYME_ACTIVATOR_ACTIVITY;ENZYME_REGULATOR_ACTIVITY;ESTABLISHMENT_OF_LOCALIZATION;EXTRACELL…	Completeproteome;Directproteinsequencing;Disulfidebond;Glycoprotein;Referenceproteome;Repeat;Secreted;Signal		GO:0003006;GO:0006629;GO:0006643;GO:0006665;GO:0008152;GO:0009966;GO:0009987;GO:0010033;GO:0010627;GO:0019216;GO:0019222;GO:0022414;GO:0023051;GO:0030154;GO:0030855;GO:0032502;GO:0040007;GO:0042221;GO:0043408;GO:0044237;GO:0044238;GO:0044255;GO:0048583;GO:0048589;GO:0048610;GO:0048869;GO:0050789;GO:0050794;GO:0050896;GO:0051716;GO:0060736;GO:0060742;GO:0065007;GO:0070887;GO:0071310;GO:0080090		GO:0000323;GO:0005615;GO:0005739;GO:0005764;GO:0005773;GO:0005794;GO:0043226;GO:0043227;GO:0043229;GO:0043231;GO:0044421;GO:0044424;GO:0044444;GO:0044464	GO:0006629;GO:0008152;GO:0009987;GO:0030154;GO:0032502;GO:0040007;GO:0042221;GO:0044237;GO:0044238;GO:0044255;GO:0050896;GO:0065007	GO:0005615;GO:0005739;GO:0005764;GO:0005773;GO:0005794;GO:0043226;GO:0043229;GO:0043231;GO:0044464			5.4641e-91	5753700000	-0.225712	0.731336	-0.265862	E9PZ00;Q8BFQ1;K3W4L3;Q61207;J3QPG5	E9PZ00;Q8BFQ1;K3W4L3;Q61207;J3QPG5	Sulfated glycoprotein 1	Psap
25.3312	24.1416	25.3392	24.4319	24.3547	24.3247	24.2334	24.4563	25.9465	25.5872	24.2405	24.8707				biological regulation;cation homeostasis;cation transport;cellular cation homeostasis;cellular chemical homeostasis;cellular homeostasis;cellular ion homeostasis;cellular iron ion homeostasis;cellular metal ion homeostasis;cellular process;chemical homeostasis;copper ion transport;establishment of localization;homeostatic process;ion homeostasis;ion transport;iron ion homeostasis;metal ion homeos…	binding;catalytic activity;cation binding;copper ion binding;ferroxidase activity;ion binding;metal ion binding;oxidoreductase activity;oxidoreductase activity, oxidizing metal ions;oxidoreductase activity, oxidizing metal ions, oxygen as acceptor;transition metal ion binding	extracellular region part;extracellular space	biological regulation;cellular homeostasis;cellular ion homeostasis;cellular process;establishment of localization;homeostatic process;ion transport;transport	extracellular space	Porphyrin and chlorophyll metabolism	Cu-oxidase;Cu-oxidase_2;Cu-oxidase_3	AACTTT_UNKNOWN;ACEVEDO_FGFR1_TARGETS_IN_PROSTATE_CANCER_MODEL_UP;BERENJENO_ROCK_SIGNALING_NOT_VIA_RHOA_UP;BLALOCK_ALZHEIMERS_DISEASE_UP;BONOME_OVARIAN_CANCER_SURVIVAL_OPTIMAL_DEBULKING;BOYLAN_MULTIPLE_MYELOMA_C_D_DN;BOYLAN_MULTIPLE_MYELOMA_PCA1_UP;BYSTRYKH_HEMATOPOIESIS_STEM_CELL_QTL_TRANS;CAHOY_ASTROGLIAL;CAIRO_HEPATOBLASTOMA_DN;CATION_HOMEOSTASIS;CELLULAR_CATION_HOMEOSTASIS;CELLULAR_HOMEOSTASIS…	Completeproteome;Copper;Coppertransport;Disulfidebond;Glycoprotein;Iontransport;Metal-binding;Oxidoreductase;Referenceproteome;Repeat;Secreted;Signal;Transport		GO:0000041;GO:0006810;GO:0006811;GO:0006812;GO:0006825;GO:0006873;GO:0006875;GO:0006879;GO:0009987;GO:0019725;GO:0030001;GO:0030003;GO:0042592;GO:0048878;GO:0050801;GO:0051234;GO:0055065;GO:0055072;GO:0055080;GO:0055082;GO:0065007;GO:0065008	GO:0003824;GO:0004322;GO:0005488;GO:0005507;GO:0016491;GO:0016722;GO:0016724;GO:0043167;GO:0043169;GO:0046872;GO:0046914	GO:0005615;GO:0044421	GO:0006810;GO:0006811;GO:0006873;GO:0009987;GO:0019725;GO:0042592;GO:0051234;GO:0065007	GO:0005615			5.5545e-11	169830000	-0.592357	1.11894	-0.818933	G3X9T8;Q61147;G3X8Q5;E9PZD8;G3UXG1	G3X9T8;Q61147;G3X8Q5;E9PZD8	Ceruloplasmin	Cp
32.4476	32.7672	32.8209	32.279	32.5247	32.863	32.309	31.8029	32.2641	32.4601	31.9707	31.9715				biosynthetic process;cellular biosynthetic process;cellular metabolic process;cellular nitrogen compound biosynthetic process;cellular nitrogen compound metabolic process;cellular process;CTP biosynthetic process;CTP metabolic process;GTP biosynthetic process;GTP metabolic process;heterocycle biosynthetic process;heterocycle metabolic process;metabolic process;nitrogen compound metabolic process;…	adenyl nucleotide binding;adenyl ribonucleotide binding;ATP binding;binding;catalytic activity;cation binding;ion binding;kinase activity;metal ion binding;nucleobase-containing compound kinase activity;nucleoside diphosphate kinase activity;nucleotide binding;phosphotransferase activity, alcohol group as acceptor;phosphotransferase activity, nitrogenous group as acceptor;phosphotransferase activ…	cell part;cytoplasmic part;intracellular membrane-bounded organelle;intracellular organelle;intracellular part;membrane;membrane-bounded organelle;mitochondrion;organelle;plasma membrane	biosynthetic process;cellular metabolic process;cellular nitrogen compound metabolic process;cellular process;heterocycle metabolic process;metabolic process;nitrogen compound metabolic process;nucleobase-containing compound metabolic process;nucleobase-containing small molecule metabolic process;nucleoside metabolic process;nucleotide metabolic process;primary metabolic process;small molecule me…	cell part;intracellular membrane-bounded organelle;intracellular organelle;membrane;mitochondrion;organelle;plasma membrane	Purine metabolism;Pyrimidine metabolism	NDK	ALONSO_METASTASIS_UP;ANATOMICAL_STRUCTURE_DEVELOPMENT;APOPTOSIS_GO;BHATTACHARYA_EMBRYONIC_STEM_CELL;BILANGES_RAPAMYCIN_SENSITIVE_VIA_TSC1_AND_TSC2;BIOCARTA_NDKDYNAMIN_PATHWAY;BIOPOLYMER_METABOLIC_PROCESS;CELL_DEVELOPMENT;CELL_PROJECTION;CELL_PROLIFERATION_GO_0008283;chr17q21;DANG_BOUND_BY_MYC;DANG_MYC_TARGETS_UP;DNA_BINDING;ECTODERM_DEVELOPMENT;EPIDERMIS_DEVELOPMENT;FRIDMAN_SENESCENCE_UP;GSE17721…	Acetylation;ATP-binding;Cellmembrane;Completeproteome;Cytoplasm;Directproteinsequencing;Kinase;Magnesium;Membrane;Metal-binding;Nucleotide-binding;Nucleotidemetabolism;Phosphoprotein;Referenceproteome;Transferase		GO:0006139;GO:0006163;GO:0006164;GO:0006183;GO:0006213;GO:0006220;GO:0006221;GO:0006228;GO:0006241;GO:0006753;GO:0006807;GO:0008152;GO:0009058;GO:0009116;GO:0009117;GO:0009119;GO:0009141;GO:0009142;GO:0009144;GO:0009145;GO:0009147;GO:0009148;GO:0009150;GO:0009152;GO:0009165;GO:0009199;GO:0009201;GO:0009205;GO:0009206;GO:0009208;GO:0009209;GO:0009218;GO:0009220;GO:0009259;GO:0009260;GO:0009987;GO:…	GO:0000166;GO:0003824;GO:0004550;GO:0004672;GO:0004673;GO:0005488;GO:0005524;GO:0016301;GO:0016740;GO:0016772;GO:0016773;GO:0016775;GO:0016776;GO:0017076;GO:0019205;GO:0030554;GO:0032553;GO:0032555;GO:0032559;GO:0035639;GO:0043167;GO:0043169;GO:0046872	GO:0005739;GO:0005886;GO:0016020;GO:0043226;GO:0043227;GO:0043229;GO:0043231;GO:0044424;GO:0044444;GO:0044464	GO:0006139;GO:0006807;GO:0008152;GO:0009058;GO:0009116;GO:0009117;GO:0009987;GO:0034641;GO:0044237;GO:0044238;GO:0044281;GO:0046483;GO:0055086	GO:0005739;GO:0005886;GO:0016020;GO:0043226;GO:0043229;GO:0043231;GO:0044464			1.5245e-168	43076000000	0.166303	0.355772	0.208273	E9PZF0;Q01768	E9PZF0;Q01768	Nucleoside diphosphate kinase;Nucleoside diphosphate kinase B	Gm20390;Nme2
23.8778	24.7549	23.9045	25.9749	22.5732	24.4674	23.7257	25.6703	25.2547	25.413	25.8667	25.4522					enzyme inhibitor activity;enzyme regulator activity;phosphatase inhibitor activity;phosphatase regulator activity	cell part;cytoplasmic membrane-bounded vesicle;cytoplasmic part;cytoplasmic vesicle;intracellular membrane-bounded organelle;intracellular organelle;intracellular part;membrane-bounded organelle;membrane-bounded vesicle;nucleus;organelle;vesicle		cell part;cytoplasmic membrane-bounded vesicle;intracellular membrane-bounded organelle;intracellular organelle;nucleus;organelle;vesicle		LRR_4	AFFAR_YY1_TARGETS_DN;ATAGGAA,MIR-202;BENPORATH_CYCLING_GENES;BOYAULT_LIVER_CANCER_SUBCLASS_G3_UP;BRACHAT_RESPONSE_TO_CAMPTOTHECIN_DN;BROWNE_HCMV_INFECTION_10HR_UP;BROWNE_HCMV_INFECTION_14HR_UP;CAGTGTT,MIR-141,MIR-200A;CATTTCA,MIR-203;CCAWWNAAGG_V$SRF_Q4;CHANG_CYCLING_GENES;CHIARADONNA_NEOPLASTIC_TRANSFORMATION_CDC25_UP;CHIARADONNA_NEOPLASTIC_TRANSFORMATION_KRAS_UP;CHICAS_RB1_TARGETS_GROWING;chr1q…	Alternativesplicing;Completeproteome;Cytoplasm;Leucine-richrepeat;Nucleus;Phosphoprotein;Referenceproteome;Repeat			GO:0004857;GO:0019208;GO:0019212;GO:0030234	GO:0005634;GO:0016023;GO:0031410;GO:0031982;GO:0031988;GO:0043226;GO:0043227;GO:0043229;GO:0043231;GO:0044424;GO:0044444;GO:0044464		GO:0005634;GO:0016023;GO:0031982;GO:0043226;GO:0043229;GO:0043231;GO:0044464	+		1.7529e-06	210650000	-0.834297	1.08983	-1.3875	E9Q5H2;E9PZF5;P97822	E9Q5H2;E9PZF5;P97822	Acidic leucine-rich nuclear phosphoprotein 32 family member E	Anp32e
25.3831	25.2284	24.7301	25.6907	24.8564	23.7714	24.4656	24.7193	26.182	25.4111	25.3337	25.1896				actin cytoskeleton organization;actin filament organization;actin filament-based process;activation of JUN kinase activity;activation of MAPK activity;biological regulation;cation homeostasis;cation transport;cell differentiation;cellular cation homeostasis;cellular chemical homeostasis;cellular component organization;cellular component organization at cellular level;cellular component organizati…	binding;cation binding;ferric iron binding;GTP binding;guanyl nucleotide binding;guanyl ribonucleotide binding;ion binding;iron ion binding;metal ion binding;nucleotide binding;purine nucleotide binding;purine ribonucleoside triphosphate binding;purine ribonucleotide binding;ribonucleotide binding;transition metal ion binding	cell part;coated pit;cytoplasmic membrane-bounded vesicle;cytoplasmic part;cytoplasmic vesicle;endocytic vesicle;endoplasmic reticulum part;endosome;extracellular region;intracellular;intracellular membrane-bounded organelle;intracellular organelle;intracellular organelle part;intracellular part;membrane part;membrane-bounded organelle;membrane-bounded vesicle;organelle;organelle part;recycling e…	biological regulation;cell differentiation;cellular component organization;cellular homeostasis;cellular ion homeostasis;cellular metabolic process;cellular process;cytoskeleton organization;developmental process;establishment of localization;homeostatic process;ion transport;macromolecule metabolic process;macromolecule modification;metabolic process;organelle organization;phosphorus metabolic p…	cell part;cytoplasmic membrane-bounded vesicle;endosome;extracellular region;intracellular;intracellular membrane-bounded organelle;intracellular organelle;organelle;vesicle	Mineral absorption	SRPRB;Transferrin	ASTON_MAJOR_DEPRESSIVE_DISORDER_DN;BERTUCCI_INVASIVE_CARCINOMA_DUCTAL_VS_LOBULAR_DN;BLALOCK_ALZHEIMERS_DISEASE_UP;BOYAULT_LIVER_CANCER_SUBCLASS_G3_DN;BREDEMEYER_RAG_SIGNALING_NOT_VIA_ATM_DN;BROWN_MYELOID_CELL_DEVELOPMENT_DN;CADWELL_ATG16L1_TARGETS_UP;CERVERA_SDHB_TARGETS_2;CHENG_RESPONSE_TO_NICKEL_ACETATE;chr3q21;CHYLA_CBFA2T3_TARGETS_UP;COLIN_PILOCYTIC_ASTROCYTOMA_VS_GLIOBLASTOMA_UP;CTTTGA_V$LEF…	Completeproteome;Directproteinsequencing;Disulfidebond;Glycoprotein;GTP-binding;Iontransport;Iron;Irontransport;Metal-binding;Methylation;Nucleotide-binding;Referenceproteome;Repeat;Secreted;Signal;Transport		GO:0000041;GO:0000165;GO:0000187;GO:0001932;GO:0002521;GO:0002573;GO:0006355;GO:0006464;GO:0006468;GO:0006793;GO:0006796;GO:0006810;GO:0006811;GO:0006812;GO:0006826;GO:0006873;GO:0006875;GO:0006879;GO:0006996;GO:0007010;GO:0007015;GO:0007165;GO:0007243;GO:0007257;GO:0007264;GO:0008152;GO:0009889;GO:0009891;GO:0009893;GO:0009966;GO:0009987;GO:0010468;GO:0010556;GO:0010557;GO:0010604;GO:0010627;GO:…	GO:0000166;GO:0005488;GO:0005506;GO:0005525;GO:0008199;GO:0017076;GO:0019001;GO:0032553;GO:0032555;GO:0032561;GO:0035639;GO:0043167;GO:0043169;GO:0046872;GO:0046914	GO:0005576;GO:0005622;GO:0005768;GO:0005905;GO:0016023;GO:0030139;GO:0031410;GO:0031982;GO:0031988;GO:0043226;GO:0043227;GO:0043229;GO:0043231;GO:0044422;GO:0044424;GO:0044425;GO:0044432;GO:0044444;GO:0044446;GO:0044464;GO:0055037	GO:0006464;GO:0006468;GO:0006793;GO:0006810;GO:0006811;GO:0006873;GO:0006996;GO:0007010;GO:0007165;GO:0008152;GO:0009987;GO:0016043;GO:0019538;GO:0019725;GO:0030154;GO:0031399;GO:0032502;GO:0042592;GO:0043170;GO:0043412;GO:0044237;GO:0044238;GO:0050896;GO:0051234;GO:0065007	GO:0005576;GO:0005622;GO:0005768;GO:0016023;GO:0031982;GO:0043226;GO:0043229;GO:0043231;GO:0044464	+	+	4.0503e-33	278990000	-0.810082	1.77347	-1.0759	Q921I1;E9Q035;F7BAE9;E9Q2Q7;D3YYR8;F7CJN9	Q921I1;E9Q035	Serotransferrin	Tf;Gm20425
27.2499	26.5224	26.8733	27.2512	27.1356	27.127	26.9711	26.9775	27.6928	27.5862	27.2708	28.0075				ameboidal cell migration;biological regulation;cell junction assembly;cell junction organization;cell migration;cell motility;cell-substrate junction assembly;cellular component assembly;cellular component assembly at cellular level;cellular component movement;cellular component organization;cellular component organization at cellular level;cellular component organization or biogenesis;cellular c…	actin binding;binding;cation binding;cytoskeletal protein binding;ion binding;metal ion binding;protein binding	adherens junction;anchoring junction;cell junction;cell-substrate adherens junction;cell-substrate junction;focal adhesion	biological regulation;cell junction organization;cell motility;cellular component assembly;cellular component movement;cellular component organization;cellular process;locomotion;response to stimulus;signal transduction			PTB;PTEN_C2;SH2	AAAYRNCTG_UNKNOWN;ARGGGTTAA_UNKNOWN;BIOCARTA_INTEGRIN_PATHWAY;BOYAULT_LIVER_CANCER_SUBCLASS_G6_DN;CAGCTG_V$AP4_Q5;CAGGTG_V$E12_Q6;CHANDRAN_METASTASIS_DN;CHO_NR4A1_TARGETS;chr2q35;CHYLA_CBFA2T3_TARGETS_DN;CORDENONSI_YAP_CONSERVED_SIGNATURE;DODD_NASOPHARYNGEAL_CARCINOMA_UP;EBAUER_TARGETS_OF_PAX3_FOXO1_FUSION_UP;GAL_LEUKEMIC_STEM_CELL_DN;GGATTA_V$PITX2_Q2;GGGAGGRR_V$MAZ_Q6;GGGTGGRR_V$PAX4_03;GOBERT_…	Completeproteome;Metal-binding;Referenceproteome;Zinc;Zinc-finger		GO:0001667;GO:0006928;GO:0007044;GO:0007165;GO:0009987;GO:0010761;GO:0016043;GO:0016477;GO:0022607;GO:0034329;GO:0034330;GO:0035556;GO:0040011;GO:0048870;GO:0050789;GO:0050794;GO:0050896;GO:0051716;GO:0065007;GO:0071840;GO:0071841;GO:0071842;GO:0071844	GO:0003779;GO:0005488;GO:0005515;GO:0008092;GO:0043167;GO:0043169;GO:0046872	GO:0005912;GO:0005924;GO:0005925;GO:0030054;GO:0030055;GO:0070161	GO:0006928;GO:0007165;GO:0009987;GO:0016043;GO:0022607;GO:0034330;GO:0040011;GO:0048870;GO:0050896;GO:0065007			+	1.6777e-62	1153600000	-0.506241	1.99558	-0.586514	E9Q0S6	E9Q0S6		Tns1
[truncated: 1,188 more rows]
