# Supplementary material for: Altered lipid metabolism in the aging kidney identified by three layered omic analysis
Source: Aging (Albany NY). 2016 Feb 16;8(3):441–54. doi: 10.18632/aging.100900 (PMC4833139; doi:10.18632/aging.100900)
Supplement: Supplementary file 3 [file aging-08-441-s003.xlsx]

## Sheet: Phosphatidylcholines
Supplemental Table 2 - List of all lipid subspecies - PC
Sample Identification	heart 6w1	heart 6w2	heart 6w3	heart 6w4	heart 14w1	heart 14w2	heart 14w3	heart 14w4	heart 96w1	heart 96w2	heart 96w3	heart 96w4	kidney 6w1	kidney 6w2	kidney 6w3	kidney 6w4	kidney 14w1	kidney 14w2	kidney 14w3	kidney 14w4	kidney 96w1	kidney 96w2	kidney 96w3	kidney 96w4	liver 6w1	liver 6w2	liver 6w3	liver 6w4	liver 14w1	liver 14w2	liver 14w3	liver 14w4	liver 96w1	liver 96w2	liver 96w3	liver 96w4	muscle 6w1	muscle 6w2	muscle 6w3	muscle 6w4	muscle 14w1	muscle 14w2	muscle 14w3	muscle 14w4	muscle 96w1	muscle 96w2	muscle 96w3	muscle 96w4
Species	mouse	mouse	mouse	mouse	mouse	mouse	mouse	mouse	mouse	mouse	mouse	mouse	mouse	mouse	mouse	mouse	mouse	mouse	mouse	mouse	mouse	mouse	mouse	mouse	mouse	mouse	mouse	mouse	mouse	mouse	mouse	mouse	mouse	mouse	mouse	mouse	mouse	mouse	mouse	mouse	mouse	mouse	mouse	mouse	mouse	mouse	mouse	mouse
Material	heart tissue	heart tissue	heart tissue	heart tissue	heart tissue	heart tissue	heart tissue	heart tissue	heart tissue	heart tissue	heart tissue	heart tissue	kidney tissue	kidney tissue	kidney tissue	kidney tissue	kidney tissue	kidney tissue	kidney tissue	kidney tissue	kidney tissue	kidney tissue	kidney tissue	kidney tissue	liver tissue	liver tissue	liver tissue	liver tissue	liver tissue	liver tissue	liver tissue	liver tissue	liver tissue	liver tissue	liver tissue	liver tissue	muscle tissue	muscle tissue	muscle tissue	muscle tissue	muscle tissue	muscle tissue	muscle tissue	muscle tissue	muscle tissue	muscle tissue	muscle tissue	muscle tissue
weight [mg]	114.5	115.6	113.5	117.1	144.3	109.9	157.6	140.6	153.4	65.9	162.5	64.3	65.5	80.4	71.7	67.1	89.1	100.1	112.5	97.2	132.9	115.3	92.9	136.7	165.8	114.4	91.3	133.3	104.8	95.1	82.5	87.9	123.8	85.2	94.6	119.4	68.5	77.7	84.7	69.5	158.2	119.6	137.8	157.4	128.6	139.4	84.2	135
LPC a C16:0	100.562	90.2313	96.6706	95.1836	84.6923	83.1211	89.1247	96.4037	80.5835	69.1512	92.706	101.578	173.938	170.501	170.294	167.945	152.08	157.823	148.879	144.503	154.804	137.206	170.587	141.784	237.592	207.14	171.588	174.048	157.421	169.221	173.375	168.561	202.207	154.563	179.637	157.779	48.9862	62.6069	60.9986	50.4796	46.4891	45.1315	36.0624	47.2454	46.7089	41.0023	46.9407	41.2313
LPC a C18:0	98.1289	91.5839	90.4777	92.8392	69.6461	68.1644	77.7312	83.5474	65.8291	59.2304	78.1306	66.0965	147.406	150.922	144.304	151.716	130.354	122.653	115.437	121.926	138.165	113.111	140.654	128.377	161.49	156.2	122.625	132.744	112.22	91.2718	109.93	105.293	144.606	109.936	117.114	121.062	37.2557	46.9691	46.2064	38.4095	30.5993	30.709	26.4364	28.8106	37.7681	33.6663	32.7183	33.0231
LPC a C18:1	43.3245	38.9522	45.0992	46.6507	38.7584	39.6343	45.4712	41.4027	26.4968	23.9188	39.2017	45.1548	44.2623	43.4764	39.1011	46.3526	35.0406	35.1894	37.1282	36.9465	33.1285	31.7194	45.5484	40.3419	70.4632	63.7965	48.6503	58.577	49.3813	45.1713	47.724	53.5601	59.8087	51.6861	70.453	59.5666	0	17.6922	17.0581	0	0	0	0	0	0	0	17.8115	0
LPC a C18:2	41.0929	36.5	42.6462	42.5872	45.1609	45.3582	47.6376	43.5993	28.907	25.7982	37.2854	48.0043	27.5679	28.0479	27.1164	27.7696	29.0233	27.6265	28.9484	28.5948	27.9283	24.123	34.6677	28.8546	56.9351	48.9226	42.5023	45.0712	48.9015	41.165	49.1681	53.0336	49.7282	41.5558	49.4317	47.7516	0	16.5254	16.8938	0	0	0	0	0	0	0	19.6994	0
LPC a C20:4	31.3407	30.3766	34.6236	34.9925	27.1094	25.1841	26.7977	23.8152	18.531	0	24.1687	29.3839	0	16.4502	0	15.8642	0	0	0	0	0	0	18.055	15.7852	35.9047	33.7497	27.6834	33.0443	24.8174	22.1191	22.4897	26.5008	34.1025	26.2376	30.4873	31.7696	0	0	0	0	0	0	0	0	0	0	0	0
LPC e C18:0	0	0	0	0	0	0	0	0	0	0	0	0	0	0	0	0	0	0	0	0	0	0	0	0	0	0	0	0	0	0	0	0	0	0	0	0	0	0	0	0	0	0	0	0	0	0	0	0
PC aa C30:0	0	0	0	0	0	0	0	0	0	0	0	0	0	0	0	23.7186	0	0	0	0	0	0	0	0	0	0	0	0	0	0	0	0	0	0	0	0	35.1092	41.2822	35.6306	38.2805	35.4908	33.6016	30.2428	33.5346	33.4268	37.7203	32.2015	36.3884
PC aa C30:1	0	0	0	0	0	0	0	0	0	0	0	0	0	0	0	0	0	0	0	0	0	0	0	0	0	0	0	0	0	0	0	0	0	0	0	0	5.30091	6.51903	0	5.84379	7.59039	6.96845	7.53257	7.45837	5.97847	7.73686	6.61937	6.00854
PC aa C30:2	0	0	0	5.03293	0	0	0	0	0	0	0	0	0	0	0	0	0	0	0	0	0	0	0	0	0	0	0	0	0	0	0	0	0	0	0	0	5.11365	5.13425	5.12025	5.09027	5.33653	5.19564	5.22115	5.13262	5.21123	5.13669	5.24039	5.23923
PC aa C32:0	88.5958	86.0501	73.7148	86.1871	65.6154	64.9175	73.6913	79.6683	57.5982	61.9936	73.4171	24.0139	404.091	369.654	423.824	435.533	428.433	495.237	471.822	463.523	350.034	343.771	343.396	385.196	55.2043	62.6744	64.0121	59.7846	55.0192	59.2053	55.9088	71.3279	154.558	76.8154	117.468	87.0883	97.2558	123.762	91.1459	113.802	92.7835	96.6945	81.925	104.428	77.025	93.1881	78.0124	94.9514
PC aa C32:1	28.0169	24.6703	23.8269	30.5852	21.8719	21.3814	25.1713	22.1458	19.9996	21.4799	24.0153	0	62.1723	63.0038	62.6336	75.4499	59.9944	66.5331	82.2359	57.3124	48.0494	45.0092	52.8458	53.4129	149.133	130.697	156.58	156.332	146.429	188.427	200.696	133.611	141.83	130.118	132.918	128.805	184.031	217.037	184.508	213.453	215.818	228.092	232.168	207.591	212.378	239.566	207.633	225.001
PC aa C32:2	0	0	0	0	0	0	0	0	0	0	0	0	0	0	0	0	0	0	0	0	0	0	0	0	24.7482	23.8905	28.1085	24.9491	28.4421	27.7153	25.8941	24.8257	27.6133	29.5221	29.3877	27.4609	30.346	38.1389	29.5106	32.258	34.2539	34.4903	35.5811	35.2331	33.8928	31.9593	29.1693	31.9543
PC aa C34:0	10.4199	8.33055	7.91826	9.36693	5.42331	6.88148	6.94722	6.2794	0	5.50882	5.85652	0	17.471	16.9284	18.5771	17.9433	21.9902	23.6292	21.8179	21.5081	21.5089	19.9591	18.5293	19.2304	9.67034	10.3368	9.09276	10.4853	9.40704	8.93953	0	12.0636	11.5024	9.70866	11.4767	10.8607	8.13976	9.71011	0	11.0547	9.30878	5.88907	6.15553	8.25851	0	5.78708	0	5.96104
PC aa C34:1	245.009	213.614	195.194	245.12	184.129	191.377	220.163	208.47	151.452	168.716	198.785	43.3583	313.243	324.897	327.24	362.432	271.314	326.396	334.578	308.196	230.145	198.393	244.742	258.793	622.227	677.808	727.447	760.581	600.904	798.906	776.495	646.545	626.038	563.613	604.348	594.836	405.534	515.279	457.509	463.971	376.833	431.127	372.535	417.918	406.623	454.063	416.23	471.366
PC aa C34:2	386.196	338.554	313.111	360.115	387.472	436.906	435.656	407.664	269.703	214.97	321.464	72.29	418.607	431.58	453.699	440.196	553.837	637.254	652.208	567.643	476.67	373.334	481.836	491.967	1526.43	1667.8	1748.08	1681.76	1629.48	1980.09	2012.98	1966.49	1667.1	1623.15	1556.49	1652.19	980.634	1324.67	957.111	1041.79	927.469	929.16	923.025	949.049	669.578	666.087	536.361	636.792
PC aa C34:3	23.5839	21.4446	20.8947	23.5037	23.6194	24.868	24.6526	23.5445	19.5321	16.5118	22.5767	0	29.137	32.0813	31.3125	33.181	34.8603	36.3006	40.6828	35.1291	27.7256	24.8541	31.0733	31.1321	176.984	190.46	205.159	190.274	202.386	205.126	194.685	231.333	182.791	221.005	193.888	200.834	71.9035	98.5346	74.6619	80.6969	94.9375	92.9943	92.3935	89.2947	74.1646	71.6149	63.001	70.993
PC aa C36:0	6.58093	6.94736	5.79887	6.57823	6.72798	7.16823	7.49496	8.10777	6.08378	5.51225	7.24233	0	5.01869	4.88535	5.3402	5.30777	6.24217	6.14838	8.15007	6.6245	6.96015	6.11257	5.99046	6.1427	0	0	0	0	0	0	0	0	0	0	0	0	0	0	0	0	5.12761	4.45358	0	4.64476	5.0183	5.41648	4.81644	5.47371
PC aa C36:1	51.6824	42.721	40.3045	45.0385	32.3606	32.1166	42.8742	33.6854	30.5634	37.7582	32.2652	0	40.3522	40.0243	41.1483	48.5844	36.526	42.8473	44.6093	40.4865	31.5633	26.4703	32.871	34.7617	35.8053	46.4915	42.0214	57.6973	37.1754	39.0603	40.5604	40.5653	33.4105	39.227	40.4617	41.5791	25.7836	31.7167	29.3932	27.2314	22.8583	25.487	23.5035	24.2621	24.5151	26.9951	23.4009	28.7977
PC aa C36:2	141.863	114.872	100.712	122.71	110.722	126.571	134.935	116.792	79.9589	73.9245	88.8408	20.0279	128.99	128.901	136.89	140.587	144.692	167.613	167.625	158.77	125.172	99.9621	120.526	134.546	257.492	329.378	311.829	361.382	338.623	303.554	296.451	326.478	322.264	344.498	336.043	390.165	112.585	165.125	148.414	137.304	96.1467	117.196	100.405	93.8203	99.6536	101.01	80.7352	112.131
PC aa C36:3	116.182	97.5397	88.6066	109.05	92.8344	109.641	112.678	106.956	71.5415	61.7802	89.3746	20.0554	115.585	120.732	120.807	124.062	128.729	162.054	143.109	141.718	117.362	89.1741	120.254	123.386	240.527	298.775	270.405	298.928	309.646	275.894	215.506	339.322	347.55	369.337	412.406	428.48	158.592	225.516	167.165	185.653	138.245	174.834	149.012	148.608	130.352	141.628	121.027	138.868
PC aa C36:4	370.034	337.854	288.175	357.167	248.904	273.848	291.159	280.755	230.657	197.758	267.402	56.8774	435.204	439.958	433.312	475.052	389.534	449.258	387.905	463.986	400.211	298.834	411.169	419.222	668.406	768.734	753.181	773.468	639.226	647.43	614.072	718.07	832.428	806.994	836.236	880.861	702.754	933.635	787.671	833.638	716.605	749.216	696.299	757.7	470.73	519.539	452.181	512.799
PC aa C36:5	11.4663	10.6465	9.4751	11.5646	10.0992	10.762	10.3836	9.99149	8.64355	7.28991	9.91824	0	18.6266	20.1843	17.9912	20.7144	24.8324	24.527	23.96	21.9651	23.9095	17.0926	23.1249	21.2864	57.8793	65.3651	67.1607	68.1554	89.7534	61.8193	61.4901	78.6525	84.5136	84.7614	90.7224	87.014	41.9013	57.2445	43.6903	50.9926	51.3692	51.4328	53.7895	47.0843	33.3588	35.3385	30.4811	32.4542
PC aa C38:1	0	0	0	0	0	0	0	0	0	0	0	0	24.8382	22.485	28.3733	23.512	27.6303	31.3244	35.7984	35.2991	35.4868	31.9693	31.0374	33.4077	0	0	0	0	0	0	0	0	0	0	0	0	0	0	0	0	0	0	0	0	0	0	0	0
PC aa C38:2	9.13024	7.68371	7.99234	8.52703	7.74293	7.87709	7.90564	8.59492	6.91275	6.96819	7.6273	5.64353	8.69066	8.50316	9.31941	8.57978	10.7246	10.424	11.8165	13.9451	12.017	9.95214	12.111	13.3247	6.99556	6.31623	6.59097	6.93891	11.928	11.2465	10.9305	9.92805	8.50756	11.1497	11.8384	12.2875	6.66574	7.09873	6.41988	6.93698	7.07728	7.48465	6.80619	7.71785	7.18789	7.77202	6.68148	7.30936
PC aa C38:3	15.0079	11.0583	12.1206	15.1457	11.0712	15.1676	14.1353	13.9401	7.47902	9.93704	10.1093	6.10128	15.9176	17.6781	16.4313	17.8508	19.15	24.1718	22.3507	22.8664	18.6702	15.5895	16.2388	19.685	34.6691	44.2964	37.6674	48.4728	45.0762	36.6668	30.4561	44.4355	39.8242	43.2916	50.4388	53.7354	11.4794	18.0525	15.2386	15.7103	11.4046	13.3769	11.353	11.8277	11.4117	10.4613	10.4926	12.5818
PC aa C38:4	354.749	318.826	259.929	328.966	194.299	199.301	228.15	209.863	194.876	186.311	210.742	38.5177	201.416	195.993	205.568	217.252	182.86	213.002	178.459	221.347	198.674	147.727	188.856	217.66	256.429	338.428	310.257	350.104	254.318	221.182	202.006	259.352	302.272	308.399	305.193	370.231	159.391	197.416	179.063	165.335	110.973	130.53	116.966	113.772	104.743	114.564	81.5902	117.649
PC aa C38:5	139.828	134.409	110.451	140.299	89.909	103.467	103.701	103.205	85.1457	80.6417	111.092	22.8986	165.487	160.736	170.678	177.237	147.503	150.554	152.863	175.459	134.036	101.099	146.875	151.989	174.193	212.944	202.864	224.718	186.439	161.087	134.752	222.091	284.376	265.687	319.165	328.594	203.029	266.725	228.48	233.142	249.637	280.871	243.23	233.586	264	310.691	272.453	314.084
PC aa C38:6	528.565	537.088	460.328	500.216	514.917	529.797	499.607	585.518	483.467	421.369	654.567	147.695	747.416	743.683	830.145	805.004	918.952	969.134	792.422	936.409	694.187	590.315	708.407	759.268	584.058	687.29	708.114	672.729	655.425	644.25	584.865	615.252	666.53	662.162	694.992	736.591	444.559	513.395	476.804	440.534	867.002	809.421	691.384	777.518	926.284	1119.06	998.108	1227.45
PC aa C40:4	5.96724	5.64985	4.21695	5.57496	3.31729	0	0	4.18632	3.44914	0	0	0	3.70433	3.84152	4.68339	3.94559	3.86083	3.97903	4.10311	4.11657	3.94988	0	3.81263	3.9003	4.07549	4.86503	5.16659	4.20736	6.23278	6.08034	4.85562	5.6906	5.58373	5.52632	6.66761	6.97774	4.44352	4.99805	4.91033	4.14724	3.253	3.68692	0	3.68485	3.81666	3.67578	0	3.84113
PC aa C40:5	27.1677	28.8021	22.3098	26.6826	14.9082	17.4077	16.9729	17.2601	12.2604	13.5957	16.3086	0	11.2952	11.1792	14.1091	12.6148	15.1509	14.5516	31.1192	19.5329	21.1906	15.6327	13.1872	13.7344	7.62418	10.5778	11.3924	10.5025	10.2659	9.76835	9.38655	11.5514	13.7808	13.4243	15.5923	16.1801	11.6175	12.9441	11.6441	11.2601	11.6621	14.2156	10.5662	11.7496	14.2991	14.7038	11.9872	15.9376
PC aa C40:6	213.563	210.126	181.474	195.649	203.045	201.351	207.996	236.773	208.823	181.557	258.736	49.9358	72.0284	70.5237	78.9787	78.1375	94.2802	110.486	88.8395	103.214	77.7446	66.3667	70.8243	80.9064	75.7179	95.3089	89.7609	100.928	88.1111	80.2541	74.5311	70.6888	78.775	71.3957	72.9717	84.7059	52.1371	48.2323	44.8605	41.5027	86.5222	81.4095	60.7648	73.6979	79.242	93.5173	61.8938	103.384
PC aa C40:7	41.6624	44.4184	33.5003	43.7134	38.6481	41.16	40.13	46.1388	40.6843	36.2603	57.5416	13.4414	34.9395	34.8597	37.1429	38.1964	40.8047	46.016	35.548	44.5596	40.2332	31.9702	42.8084	42.3966	56.1928	69.5231	69.2673	70.1688	76.3122	59.0642	46.9739	71.2614	87.8701	82.7506	101.48	101.534	23.8119	28.4564	24.5425	24.0364	43.4276	43.1828	37.4722	43.8597	72.0295	82.2558	76.0854	94.8199
PC aa C40:8	91.0741	105.567	81.5391	97.2601	121.465	126.764	121.481	135.196	107.274	80.3441	137.684	31.847	29.428	32.8285	30.0837	30.9295	35.8919	38.1936	32.5103	37.6445	32.7577	25.9767	34.7575	33.9645	18.6131	24.3286	24.0864	23.4006	30.5256	20.7748	18.4865	29.9907	27.5581	34.2521	36.6912	37.6063	24.9689	28.2084	24.8792	24.2076	51.6792	47.0187	40.1246	51.2412	63.9532	65.2995	55.9417	79.9752
PC ae C32:0	0	0	0	0	0	0	0	0	0	0	0	0	30.5088	27.3442	33.1681	30.6253	34.1067	39.0776	58.1413	40.0125	29.7818	31.0462	29.2849	33.6284	0	0	0	0	0	0	0	0	0	0	0	0	0	0	0	0	0	0	0	0	0	0	0	0
PC ae C32:1	0	0	0	0	0	0	0	0	0	0	0	0	0	0	0	0	0	0	17.4041	0	0	0	0	0	0	0	0	0	0	0	0	0	0	0	0	0	0	0	0	0	0	0	0	0	0	0	0	0
PC ae C32:6	0	0	0	0	0	0	0	0	0	0	0	0	0	0	0	0	0	0	0	0	0	0	0	0	0	0	0	0	0	0	0	0	0	0	0	0	0	0	0	0	0	0	0	0	0	0	0	0
PC ae C34:0	0	0	0	0	0	0	0	0	0	0	0	0	5.98934	6.06031	6.55961	6.74558	6.49877	7.69029	6.90057	7.50145	6.0896	6.40661	6.40117	6.54604	0	0	0	0	0	0	0	0	0	0	0	0	0	0	0	0	0	0	0	0	0	0	0	0
PC ae C34:1	0	0	0	0	0	0	0	0	0	0	0	0	31.3213	28.2617	35.1342	30.7051	29.8098	37.01	58.4748	34.4909	28.2393	31.3205	28.6503	33.4789	19.1024	19.0055	20.6018	20.5637	19.0243	23.3088	22.0405	21.2736	27.5327	22.0579	23.2533	23.8937	21.7848	25.8213	24.0387	23.6815	22.3425	26.9132	23.953	26.0546	24.8608	26.1505	26.6691	29.0183
PC ae C34:2	0	0	0	0	0	0	0	0	0	0	0	0	21.0533	20.6827	23.9543	21.2194	24.131	28.697	43.7605	28.4277	23.491	21.3687	21.6086	24.7449	0	0	16.0684	0	0	17.3288	16.0491	18.2604	19.4072	16.841	17.5555	16.9899	0	16.0376	0	0	15.9535	16.9004	16.1716	17.873	16.8963	16.09	15.3106	16.2306
PC ae C34:3	0	0	0	0	0	0	0	0	0	0	0	0	0	0	0	0	0	0	0	0	0	0	0	0	0	0	0	0	0	0	0	0	0	0	0	0	0	0	0	0	0	0	0	0	0	0	0	0
PC ae C34:6	0	0	0	0	0	0	0	0	0	0	0	0	0	0	0	0	0	0	0	0	0	0	0	0	0	0	0	0	0	0	0	0	0	0	0	0	0	0	0	0	0	0	0	0	0	0	0	0
PC ae C36:1	0	0	0	0	0	0	0	0	0	0	0	0	0	0	0	0	0	0	0	0	0	0	0	0	0	0	0	0	0	0	0	0	0	0	0	0	0	0	0	0	0	0	0	0	0	0	0	0
PC ae C36:2	0	0	0	0	0	0	0	0	0	0	0	0	0	0	0	0	0	0	0	0	0	0	0	0	16.5888	18.8398	19.2325	19.4976	22.0159	20.9455	20.2822	23.7459	25.0158	25.0846	28.7765	26.6325	0	16.7751	0	0	15.6414	16.6451	15.5927	17.3541	0	15.2903	0	16.0328
PC ae C36:3	0	0	0	0	0	0	0	0	0	0	0	0	0	0	0	0	0	0	0	0	0	0	0	0	0	0	0	0	0	0	0	0	15.3166	0	16.5525	15.3169	0	0	0	0	0	0	0	0	0	0	0	0
PC ae C36:4	7.46455	7.4378	6.15692	7.6788	5.32207	5.34577	5.83038	5.81428	0	0	5.69648	0	34.3275	32.6923	36.7598	36.9293	31.566	36.9761	43.1055	41.7732	48.9482	35.799	39.4827	41.256	7.09653	7.5369	8.33593	6.74811	6.25709	7.09895	6.73574	7.95919	11.8124	9.02466	8.81681	9.44204	7.55274	9.33333	8.07831	8.07074	7.44062	8.23634	7.64405	8.96698	6.58856	6.51831	6.24784	7.21784
PC ae C36:5	22.6143	22.288	17.4743	21.1579	12.5799	15.2026	16.7133	15.6914	10.6966	10.1209	12.4828	0	30.8966	30.9246	33.7057	34.1324	31.0192	35.5915	40.7583	34.987	35.6235	24.8259	33.6251	36.1982	0	0	0	0	0	0	0	0	5.69126	0	0	0	6.17944	8.64886	6.57221	6.77058	9.22424	9.00554	8.50994	9.07493	9.94468	9.65199	8.64471	9.43572
PC ae C38:1	0	0	0	0	0	0	0	0	0	0	0	0	0	0	0	0	0	0	0	0	0	0	0	0	0	0	0	0	0	0	0	0	0	0	0	0	0	0	0	0	0	0	0	0	0	0	0	0
PC ae C38:2	0	0	0	0	0	0	0	0	0	0	0	0	0	0	0	0	0	0	0	0	0	0	0	0	0	0	0	0	0	0	0	0	0	0	0	0	0	0	0	0	0	0	0	0	0	0	0	0
PC ae C38:3	0	0	0	0	0	0	0	0	0	0	0	0	0	0	0	0	0	0	0	0	0	0	0	0	0	0	0	0	0	0	0	0	0	0	0	0	0	0	0	0	0	0	0	0	0	0	0	0
PC ae C38:4	10.2683	9.645	8.11173	9.71152	7.08354	7.69434	8.36351	9.21611	7.44795	6.28055	10.0325	0	11.4394	11.3737	12.8279	12.7824	12.8954	13.1129	16.4039	15.2031	13.6868	11.5066	12.8102	13.9978	10.04	12.7335	12.1592	12.5987	12.301	10.8574	9.79373	13.3072	17.052	16.944	19.0874	19.4162	9.68774	11.8186	10.5214	10.9324	10.801	12.9498	11.1312	13.7992	9.48862	10.1652	9.22156	11.1953
PC ae C38:5	12.2388	11.6363	9.49738	12.6403	7.35456	8.0744	8.27663	8.50148	6.56497	6.67281	7.70421	0	27.4592	24.2554	29.7586	27.8619	32.3153	35.1264	79.9763	39.5345	39.9456	29.9977	26.018	29.1857	7.65043	10.2423	9.75233	9.6147	7.68069	8.56998	7.01585	10.2741	17.3311	12.426	13.3944	14.3413	9.15163	10.6912	10.0917	9.82507	9.76176	11.1216	10.4873	9.90172	9.95335	10.7882	9.61641	10.6157
PC ae C38:6	32.6208	33.2943	27.827	32.1383	22.6452	25.8416	25.1197	29.0926	20.5061	18.4141	28.3064	6.57221	498.788	462.137	645.505	501.895	665.349	712.663	1091.95	726.03	741.67	611.063	440.472	506.868	5.17811	5.61366	5.90423	5.14129	5.20532	5.86915	5.01889	5.98504	7.83642	6.24385	6.56212	7.08905	11.5878	11.9291	11.606	10.9036	19.7196	19.8715	17.5409	18.4409	24.0444	23.6876	23.5849	26.3067
PC ae C40:5	3.86337	3.74169	0	3.63611	3.4091	3.55609	3.52421	3.87324	0	0	3.96534	0	4.56444	4.38642	5.87433	4.91753	5.65272	6.01133	7.86674	6.93721	6.69492	5.60018	5.20704	5.39711	3.57696	4.27877	3.65001	3.96644	4.0638	3.73653	3.70345	4.06634	4.69669	4.59445	5.1836	5.37392	0	0	3.27037	0	4.2575	4.30999	3.96938	4.47079	5.10163	5.48275	5.83843	6.03683

## Sheet: Phosphatidylethanolamines
Supplemental Table 2 - List of all lipid subspecies - PE
Sample Identification	H1	H2	H3	H4	H5	H6	H7	H8	H9	H10	H11	H12	K1	K2	K3	K4	K5	K6	K7	K8	K9	K10	K11	K12	L1	L2	L3	L4	L5	L6	L7	L8	L9	L10	L11	L12	M1	M2	M3	M4	M5	M6	M7	M8	M9	M10	M11	M12
Species	mouse	mouse	mouse	mouse	mouse	mouse	mouse	mouse	mouse	mouse	mouse	mouse	mouse	mouse	mouse	mouse	mouse	mouse	mouse	mouse	mouse	mouse	mouse	mouse	mouse	mouse	mouse	mouse	mouse	mouse	mouse	mouse	mouse	mouse	mouse	mouse	mouse	mouse	mouse	mouse	mouse	mouse	mouse	mouse	mouse	mouse	mouse	mouse
Material	heart tissue	heart tissue	heart tissue	heart tissue	heart tissue	heart tissue	heart tissue	heart tissue	heart tissue	heart tissue	heart tissue	heart tissue	kidney tissue	kidney tissue	kidney tissue	kidney tissue	kidney tissue	kidney tissue	kidney tissue	kidney tissue	kidney tissue	kidney tissue	kidney tissue	kidney tissue	liver tissue	liver tissue	liver tissue	liver tissue	liver tissue	liver tissue	liver tissue	liver tissue	liver tissue	liver tissue	liver tissue	liver tissue	muscle tissue	muscle tissue	muscle tissue	muscle tissue	muscle tissue	muscle tissue	muscle tissue	muscle tissue	muscle tissue	muscle tissue	muscle tissue	muscle tissue
weight [mg]	114.5	115.6	113.5	117.1	144.3	109.9	157.6	140.6	153.4	65.9	162.5	64.3	65.5	80.4	71.7	67.1	89.1	100.1	112.5	97.2	132.9	115.3	92.9	136.7	165.8	114.4	91.3	133.3	104.8	95.1	82.5	87.9	123.8	85.2	94.6	119.4	68.5	77.7	84.7	69.5	158.2	119.6	137.8	157.4	128.6	139.4	84.2	135
LPE a C16:0	0.899883	0.746733	0.881749	0.842703	0.704451	0.768638	0.940923	0.95951	0.641583	0.553599	0.822161	0.612834	2.30556	2.16809	2.17516	1.67466	2.03626	2.19374	1.93056	1.9371	1.67352	1.59987	1.94505	1.7173	5.13403	4.86417	4.28044	4.03972	3.84569	5.09689	5.39921	4.30958	3.76948	3.34846	4.0044	3.25864	0.604481	0.672814	0.626689	0.587845	0	0	0	0.517078	0	0	0	0
LPE a C18:0	2.58313	1.83278	2.25407	2.27947	1.57904	1.69585	2.5792	2.91529	1.16151	0.901433	2.05579	1.06436	5.0317	4.8177	4.69007	3.55972	4.47491	4.92144	4.2793	4.66282	3.50179	3.69416	4.42915	3.90498	7.41963	6.56593	4.97076	5.93458	4.13919	5.39403	6.42429	4.59309	4.07156	3.35407	3.79541	3.25798	0.964877	1.14517	0.970968	0.96278	0.637693	0.685867	0.557358	0.632298	0.637971	0.538893	0	0.526033
LPE a C18:1	1.17431	0.888353	1.0795	1.18481	0.779855	0.882054	1.25264	1.40142	0.600605	0	1.03281	0.708374	2.62344	2.51698	2.43006	2.01791	2.32218	2.27543	2.21234	2.20835	1.84608	1.93887	2.55772	2.35624	3.43726	3.07819	2.44891	2.89598	2.5196	2.80549	2.72703	3.11179	2.76435	2.43048	3.24093	2.63367	0	0.586344	0	0	0	0	0	0	0	0	0	0
LPE a C18:2	1.03502	0.840301	1.0864	1.14555	1.09412	1.22688	1.33151	1.18516	0.627547	0	0.814767	0.705507	0.887051	0.830053	0.842589	0.665338	0.869888	0.919911	0.984254	0.851711	0.706654	0.725081	0.857721	0.778555	1.72751	1.41194	1.50695	1.34235	1.67049	1.75255	2.07592	2.017	1.79905	1.22069	1.47519	1.37398	0	0	0	0	0	0	0	0	0	0	0	0
LPE a C20:4	1.46578	1.27777	1.50518	1.68079	1.17787	1.26905	1.38572	1.21818	0	0	1.18914	0.988388	2.60298	2.49834	2.51901	1.97664	2.18502	2.27448	2.14731	2.48958	1.77088	3.14194	2.3829	2.21329	4.02456	3.22072	2.92576	3.24692	2.55453	2.69774	2.98348	3.21095	3.05347	2.12197	2.67481	2.37049	0	0	0	0	0	0	0	0	0	0	0	0
LPE a C22:4	0	0	0	0	0	0	0	0	0	0	0	0	0	0	0	0	0	0	0	0	0	0	0	0	0	0	0	0	0	0	0	0	0	0	0	0	0	0	0	0	0	0	0	0	0	0	0	0
LPE a C22:5	1.124	1.05422	1.25396	1.27662	0.914346	0.917982	1.04266	0.931836	0	0	0.807859	0	0	0	0	0	0	0	0	0	0	0	0	0	0	0	0	0	0	0	0	0	0	0	0	0	0	0	0	0	0	0	0	0	0	0	0	0
LPE a C22:6	6.28963	5.75972	7.08569	7.07246	7.40305	7.03958	7.73714	7.62846	3.77531	2.3063	6.96838	5.84283	3.9709	3.76079	4.50121	3.03276	4.98541	3.98686	4.37921	5.2	3.45416	4.88807	3.68836	3.85729	3.42836	2.97859	3.098	2.75164	3.17178	2.98099	3.40284	3.11929	3.32573	2.10549	2.52302	2.41464	0	0.814294	0	0	0	0	0	0	0	0	0	0
LPE e C18:0	0	0	0	0	0	0	0	0	0	0	0	0	0	0	0	0	0	0	0	0	0	0	0	0	0	0	0	0	0	0	0	0	0	0	0	0	0	0	0	0	0	0	0	0	0	0	0	0
PE aa C20:0	0	0	0	0	0	0	0	0	0	0	0	0	0	0	0	0	0	0	0	0	0	0	0	0	0	0	0	0	0	0	0	0	0	0	0	0	0	0	0	0	0	0	0	0	0	0	0	0
PE aa C22:2	0	0	0	0	0	0	0	0	0	0	0	0	0	0	0	0	0	0	0	0	0	0	0	0	0	0	0	0	0	0	0	0	0	0	0	0	0	0	0	0	0	0	0	0	0	0	0	0
PE aa C26:4	0	0	0	0	0	0	0	0	0	0	0	0	0	0	0	0	0	0	0	0	0	0	0	0	0	0	0	0	0	0	0	0	0	0	0	0	0	0	0	0	0	0	0	0	0	0	0	0
PE aa C28:4	0	0	0	0	0	0	0	0	0	0	0	0	0	0	0	0	0	0	0	0	0	0	0	0	0	0	0	0	0	0	0	0	0	0	0	0	0	0	0	0	0	0	0	0	0	0	0	0
PE aa C28:5	0	0	0	0	0	0	0	0	0	0	0	0	0	0	0	0	0	0	0	0	0	0	0	0	0	0	0	0	0	0	0	0	0	0	0	0	0	0	0	0	0	0	0	0	0	0	0	0
PE aa C34:0	0	0	0	0	0	0	0	0	0	0	0	0	0	0	0	0	0	0.57884	0.516597	0.544125	0	0	0	0	0	0.530446	0.576317	0.538372	0.534547	0.665394	0.642648	0.589141	0.661336	0	0.676573	0.57382	0	0	0	0	0	0	0	0	0	0	0	0
PE aa C34:1	2.42146	1.93259	1.80999	2.24459	1.4621	1.47724	1.99538	1.57911	1.30625	1.5322	1.48828	0	6.1708	5.90261	6.74087	5.64639	5.74425	6.84144	6.86885	6.18899	4.85462	4.78493	4.87084	5.65025	7.29888	8.28749	10.4144	8.79912	8.2489	11.9437	13.3689	9.85415	12.1342	7.65518	10.7823	11.4067	6.27433	6.80567	5.71735	6.13917	3.28694	3.85852	3.63541	3.96794	3.80459	3.9753	3.53906	4.34425
PE aa C34:2	7.93641	6.43848	5.79589	7.20149	6.76128	8.27074	9.09511	7.46758	5.18929	4.16265	5.66508	1.19888	11.6207	11.3358	13.4293	9.75799	15.1001	19.2108	19.8264	14.5451	11.8384	10.1534	10.924	12.236	49.1353	57.5541	69.4666	57.4268	65.2386	100.656	98.9903	81.3293	62.8153	54.165	55.196	64.5743	15.636	21.7798	16.8984	17.8507	10.1155	12.7474	10.6852	10.6771	9.16723	8.69577	6.47257	8.90027
PE aa C34:3	0.917079	0.699264	0	0.859771	0	0.808016	0.954445	0	0	0	0	0	2.04168	2.10445	2.54213	1.98282	2.52892	3.29348	3.80532	2.17444	1.81356	1.59997	1.88284	2.1032	7.184	7.99413	9.59843	8.43534	10.2395	12.6899	13.8106	12.6025	9.26062	8.7595	8.9575	10.1015	2.3907	4.27505	2.95155	3.00109	2.042	2.57518	1.98196	1.84907	1.81137	1.73902	1.33245	1.83379
PE aa C36:0	5.86746	5.44318	4.44046	5.55504	4.36671	4.36073	5.0097	5.08224	3.68404	3.65215	3.99858	1.0766	3.90325	3.71241	4.27012	3.32524	4.6697	4.88658	5.30115	4.6757	3.79893	3.79371	3.2913	4.00319	0	0	0	0	0	0	0	0	1.1595	0	0	0	4.28457	4.75119	3.79177	4.69381	5.8576	5.28295	4.92279	5.59845	4.14783	4.70352	4.70987	4.974
PE aa C36:1	2.00469	1.76758	1.57614	1.89576	1.20447	1.20737	1.5816	1.34189	1.2102	1.54691	1.236	0	3.27631	3.04889	3.34254	2.92274	2.89751	3.33754	3.32862	3.3382	2.71717	2.71194	2.60443	3.02416	2.28201	2.38061	2.77418	2.75686	2.41008	2.85431	2.979	2.8129	2.83034	2.23451	2.69179	2.63847	3.15068	3.12185	2.89768	2.70884	1.58098	1.96343	1.83143	2.08993	2.18021	2.11266	1.99275	2.43738
PE aa C36:2	13.3065	11.0674	9.02596	12.1692	9.85285	12.2035	13.4534	11.1173	7.53069	6.32035	7.869	1.6407	17.1799	16.195	18.8631	14.3975	20.7368	24.3685	24.4269	21.139	16.5891	15.3807	15.6592	17.9521	23.1852	28.4995	31.6641	30.6327	31.9462	37.7925	39.0551	33.6197	27.1374	22.142	22.4479	25.4011	20.648	25.9068	20.8108	24.0259	13.9669	17.0632	15.7635	14.9123	13.0775	12.2431	9.0237	12.581
PE aa C36:3	9.87997	7.74253	6.86704	9.22563	6.98238	8.79274	9.78156	8.37584	5.61145	4.92682	6.36418	1.28279	16.5603	16.176	18.3127	13.7077	20.1095	24.0152	26.1444	20.1498	17.7142	15.959	17.8458	20.4192	27.2915	34.3741	35.9094	33.8511	40.87	45.7492	37.74	53.472	41.2703	39.1304	43.1863	46.1077	16.8619	23.4762	17.394	18.6712	8.77071	11.5237	8.98655	9.87743	9.74865	8.86963	6.58154	10.8104
PE aa C36:4	20.7276	16.9137	14.8966	19.529	13.0414	16.2066	17.6956	14.7572	12.2673	10.6364	13.4926	2.52835	106.59	99.974	111.409	90.3058	105.209	114.997	109.467	105.368	87.5546	79.5341	82.204	93.0094	125.445	146.718	155.254	151.97	145.326	174.248	160.896	166.066	149.996	142.153	146.271	159.59	39.1052	49.9511	40.7846	48.0384	23.2715	26.7263	25.076	25.2228	15.6025	15.4963	12.2623	15.3199
PE aa C36:5	2.42997	1.9461	1.79401	2.39688	1.59257	1.66624	2.0627	1.52186	1.37863	1.4008	1.47946	0	7.85906	7.74886	8.06613	7.58278	9.69717	9.78505	10.4927	8.24958	7.20351	6.13325	7.07037	7.14324	16.4148	18.5265	19.3182	20.147	23.6682	22.9516	23.8048	25.6809	18.9868	19.9722	20.2238	21.6674	5.37018	6.62173	5.27362	6.15341	2.80952	2.94755	2.71473	2.63268	1.74795	1.68238	1.43637	1.73388
PE aa C38:0	3.22794	2.99537	2.50261	3.19048	3.33708	3.4612	3.78543	4.02069	3.10963	3.12298	4.09988	0	2.75243	2.71686	3.15605	2.43574	3.46351	3.66557	3.50985	3.70089	3.11907	3.4413	2.78932	3.34129	0	1.21	1.36954	1.24131	1.51753	1.54548	1.25055	1.59034	1.7574	1.54492	1.75141	1.70518	3.1414	3.23222	2.7669	3.25296	3.83649	3.67344	3.25729	3.93095	3.66003	4.0621	4.247	4.47057
PE aa C38:1	2.75799	2.58124	2.21512	2.70173	2.45499	2.32096	2.59611	2.9864	2.25616	2.20307	2.85786	0	3.54134	3.55833	3.91152	3.16266	4.26915	4.9345	4.86094	4.94153	4.25879	4.95515	4.03905	4.82848	0	0	0	0	0	0	0	0	0	0	0	0	1.91587	2.03449	1.73395	1.99262	2.29045	1.96628	1.90968	2.28405	2.2061	2.31797	2.46165	2.47451
PE aa C38:2	1.44687	1.34219	1.24211	1.41132	1.27602	1.37533	1.45923	1.53073	1.15048	1.08628	1.3072	0	2.18985	2.21946	2.6626	1.86279	2.85309	3.21457	3.14318	3.4233	2.62097	2.78837	2.63344	3.10722	1.27183	1.5222	1.61391	1.49429	1.70207	2.13888	2.06989	2.0016	1.71308	1.57745	1.8816	2.00196	1.31662	1.41764	1.31383	1.44648	1.25501	1.25222	1.15456	1.31807	1.18629	1.19355	1.12489	1.26777
PE aa C38:3	0	n.d	0	0	0	0	0	0	0	0	0	0	0	0	0	0	0	1.6524	0.0868592	0.220819	0	0	0	0	1.87998	4.86668	4.49487	5.2872	3.60988	6.60285	3.90124	6.70789	2.17011	0.614977	2.36626	2.57987	0	0	0	0	0	0	0	0	0	0	0	0
PE aa C38:4	124.572	102.951	84.8753	116.122	62.2894	76.0603	88.5139	77.3898	60.1967	58.0485	73.0697	3.95651	322.405	298.86	351.704	270.72	340.198	382.689	364.348	371.237	286.517	283.383	265.036	320.056	280.059	340.171	344.174	360.674	276.056	321.293	306.34	310.349	260.95	251.435	246.569	268.613	134.585	164.588	142.999	177.663	53.989	77.8601	68.2505	59.9162	36.1117	36.1392	20.8524	35.9409
PE aa C38:5	47.2898	37.413	31.1085	46.1238	17.8547	25.8477	29.7597	25.1963	18.403	18.6807	24.7309	0	128.126	121.118	132.862	109.243	129.523	134.795	132.068	137.681	109.94	94.0103	109.767	126.565	105.717	134.43	133.119	139.876	131.942	136.05	119.169	166.344	155.839	146.647	166.831	174.357	78.9369	89.0405	73.6762	89.116	31.2173	37.2116	31.876	34.1884	24.0011	27.5765	20.3478	27.0314
PE aa C38:6	134.275	122.905	105.756	123.145	113.967	126.218	131.259	134.235	103.536	92.7457	130.589	16.8013	98.8694	99.2604	110.111	85.4886	126.287	126.329	108.989	115.123	88.2213	81.6923	80.8817	90.4482	291.171	350.537	387.121	353.546	363.692	424.332	377.271	357.588	330.764	295.708	306.345	335.601	160.89	166.981	157.587	169.606	175.364	175.197	152.828	175.772	170.466	210.402	185.405	212.605
PE aa C38:7	0	0	0	0	0	0	0	0	0	0	0	0	0	0	0	0	3.07355	1.89599	4.77991	1.19881	0	0	0	0	8.35742	10.543	13.2134	12.0546	17.0161	17.4132	16.7291	16.3578	12.3989	12.5841	12.6319	13.9933	6.66163	6.26251	4.3021	6.61778	5.74877	2.94584	3.2917	3.83672	2.14789	4.57877	2.68918	3.68076
PE aa C40:2	0	0	0	0	0	0	0	0	0	0	0	0	0	0	0	0	0	0	0	0	0	0	0	0	0	0	0	0	0	0	0	0	0	0	0	0	0	0	0	0	0	0	0	0	0	0	0	0
PE aa C40:3	0	0	0	0	0	0	0	0	0	0	0	0	0	0	0	0	0	0	0	0	0	0	0	0	0	0	0	0	0	0	0	0	0	0	0	0	0	0	0	0	0	0	0	0	0	0	0	0
PE aa C40:4	0	0	0	0	0	0	0	0	0	0	0	0	0	0	0	0	0	0	0	0	0	0	0	0	0	0	0	0	0	0	0	0	0	0	0	0	3.69543	4.74052	3.34866	5.48021	0	0	0	0	0	0	0	0
PE aa C40:5	22.3997	20.5729	14.609	22.2384	7.56984	10.1621	13.7163	12.2917	4.52218	3.9023	8.29167	0	0.102673	0	1.30969	0	0.122745	0.960273	1.20306	1.50421	0	0	0	0	0	2.14766	3.15293	1.95025	2.66967	5.26329	4.65642	3.82378	4.67343	1.37498	3.71455	3.77264	38.7713	41.4435	34.8666	46.9234	23.4417	30.5142	27.7358	23.241	19.4644	21.2304	14.2722	19.9514
PE aa C40:6	218.236	203.257	166.808	200.548	178.424	190.391	210.019	212.454	147.207	130.101	186.206	25.6673	44.7214	44.7443	53.5004	37.1567	60.3603	63.7896	56.1912	61.3831	36.7027	39.4502	32.3363	39.4719	51.2026	64.8732	69.9773	70.1306	64.8405	76.2303	76.7424	54.2218	47.3601	33.2725	34.6797	38.2547	220.034	217.316	198.405	231.265	234.018	246.02	214.953	222.289	185.11	210.428	160.157	209.753
PE aa C40:7	123.874	113.763	93.0636	120.562	97.1119	108.718	119.119	121.91	91.3651	87.5748	124.713	14.6966	67.1808	64.3194	76.5896	54.5077	86.4549	87.1318	92.3514	85.0663	68.2451	72.7949	66.4603	79.6846	55.6625	72.175	75.2879	73.1286	83.9209	87.0673	69.6761	88.8844	78.1764	68.3157	81.7177	81.2739	133.835	120.641	113.882	123.375	93.9419	86.2322	76.5248	99.2106	93.1958	111.829	96.1897	126.521
PE aa C48:1	0.365531	0.369787	0.365262	0.367257	0.365566	0.364782	0.36728	0.359559	0.367001	0.367713	0.367861	0.357773	0.361821	0.362997	0.364064	0.363818	0.360586	0.366369	0.364484	0.361242	0.369153	0.362292	0.365579	0.364341	0.365626	0.370192	0.368901	0.367913	0.363527	0.363847	0.361462	0.358114	0.367937	0.36796	0.371582	0.369059	0.360691	0.364658	0.362258	0.361882	0.362879	0.360405	0.363032	0.361377	0.361378	0.360871	0.358258	0.360826
PE ae C34:1	0	0	0	0	0	0	0	0	0	0	0	0	0	0	0	0	0.582574	0.600345	0.661864	0.592393	0.57571	0.632412	0.574334	0.693111	0	0.436153	0.534421	0	0	0.609389	0.610664	0.598626	0.949562	0.559969	0.602146	0.662541	1.10071	1.05387	0.883107	1.07854	0	0.657922	0.614241	0.686476	0.518423	0.534652	0	0.569832
PE ae C34:2	0	0	0	0	0	0	0	0	0	0	0	0	0.628834	0.583551	0.65082	0.534455	0.74821	0.810013	0.941766	0.809542	0.781676	0.808804	0.720076	0.847843	0	0.393326	0	0	0	0.603675	0.55567	0.573324	0.606038	0.530319	0.562753	0.636936	0.861574	0.86215	0.757958	0.747512	0.60111	0.635085	0.61425	0.703157	0.579804	0.581251	0.546208	0.663153
PE ae C34:3	0	0	0	0	0	0	0	0	0	0	0	0	0	0	0	0	0	0	0	0	0	0	0	0	0	0.313557	0	0	0	0	0	0	0	0	0	0	0	0	0	0	0	0	0	0	0	0	0	0
PE ae C36:1	0	0	0	0	0	0	0	0	0	0	0	0	0	0	0	0	0	0	0	0	0	0	0	0	0	0.700671	0	0	0	0	0	0	0	0	0	0	0	0	0	0	0	0	0	0	0	0	0	0
PE ae C36:2	0	0	0	0	0	0	0	0	0	0	0	0	0	0	0	0	0	1.1129	1.11719	0	0	0	0	0	1.18006	1.39746	1.60459	1.37151	1.81369	2.14284	1.98602	2.04285	1.76331	1.66272	1.89191	2.05869	1.16144	1.20485	1.11735	1.15228	0	1.13248	1.08296	1.09485	0	0	0	1.18881
PE ae C36:3	0	0	0	0	0	0	0	0	0	0	0	0	0	0	0	0	0	0.805185	0.835253	0	0	0	0	0.802256	0	0	0.883306	0	0.989902	1.11884	1.00525	1.23459	1.07032	1.08095	1.15967	1.22018	1.19237	1.07057	1.05023	0.875428	0	0.931711	0.977729	1.01606	1.19059	1.09514	1.14307	1.38462
PE ae C36:4	0	0	0	0	0	0	0	0	0	0	0	0	1.72762	1.68982	1.87894	1.48672	2.10361	2.02331	2.42831	2.26098	2.28453	1.98188	2.18403	2.30555	0	0	0	0	0	0	0	1.01923	1.10819	0	0	0.859732	0	0	0	0	0	0	0	0	0	0	0	0
PE ae C36:5	1.5402	1.39043	1.14739	1.47072	0.829966	0.849871	1.07949	0.967372	0.832399	0.935806	0	0	4.31051	4.29583	4.48405	3.82658	4.01134	4.3824	4.48596	4.26431	4.17846	3.45905	3.76517	4.40186	0	0.827839	0.856187	0.827326	0	0.879559	0.83455	0.949525	1.92576	0.921474	1.40515	0.970655	1.65156	1.98973	1.69733	1.7747	0.912375	1.04073	0.967053	1.00822	0.913909	0.894083	0	0.981548
PE ae C38:1	0	0	0	0	0	0	0	0	0	0	0	0	0	0	0	0	0	0	0	0	0	0	0	0	0	0	0	0	0	0	0	0	0	0	0	0	0	0	0	0	0	0	0	0	0	0	0	0
PE ae C38:2	0	0	0	0	0	0	0	0	0	0	0	0	0	0	0	0	0	0	0	0	0	0	0	0	0	0	0	0	0	0	0	0	0	0	0	0	0	0	0	0	0	0	0	0	0	0	0	0
PE ae C38:3	0	0	0	0	0	0	0	0	0	0	0	0	0	0	0	0	0	0	0	0	0	0	0	0	0	0	0	0	0	0	0	0	0	0	0	0	0	0	0	0	0	0	0	0	0	0	0	0
PE ae C38:4	0	0	0	0	0	0	0	0	0	0	0	0	0	0	0	0	0	0	0	0.0356426	0	0	0	0	0	0	0	0	0	0	0	0	0	0	0	0	0	0	0	0	0	0	0	0	0	0	0	0
PE ae C38:5	0	0	0	0	0	0	0	0	0	0	0	0	0	0	0	0	0	0	0	0	0	0	0	0	0	0	0	0	0	0	0	0	0	0	0	0	0	0	0	0	0	0	0	0	0	0	0	0
PE ae C38:6	0	0	0	0	0	0	0	0	0	0	0	0	0	0	0	0	0	0	0	0	0	0	0	0	0	0	0	0	0	0	0	0	0	0	0	0	0	0	0	0	0	0	0	0	0	0	0	0
PE ae C40:1	18.845	18.6307	15.0269	18.6035	19.3795	21.7554	20.7566	20.2253	16.6053	14.3857	19.8698	3.78146	7.25863	7.19985	7.89829	5.98445	10.0592	10.098	9.25078	10.0603	7.89481	7.08933	7.31206	8.19135	3.75005	4.91794	5.12596	4.44122	6.10699	5.57019	5.14141	6.59782	5.54211	5.63152	5.86074	5.63831	28.9982	30.4871	30.2858	31.3971	33.2235	32.8003	31.3427	35.7807	32.965	35.6087	30.7248	39.5052
PE ae C40:2	1.77557	1.77494	1.65537	1.77363	1.90441	1.99967	1.8892	1.86108	1.82354	1.61502	2.02331	0	1.37377	1.42992	1.46816	1.20191	1.66802	1.76638	1.5643	1.61113	1.34515	1.29116	1.37755	1.41311	2.29944	2.89033	3.05046	2.65911	3.19677	3.23889	3.04257	3.1328	2.65679	2.58828	2.73194	2.68221	4.12536	4.15867	4.62895	4.47601	4.28688	3.98529	3.78153	4.56685	3.86726	4.15984	3.5239	4.63635
PE ae C40:3	0	0	0	0	0	0	0	0	0	0	0	0	0	0	0	0	0	0	0	0	0	0	0	0	0	0	0	0	0	0	0	0	0	0	0	0	0	0	0	0	0	0	0	0	0	0	0	0
PE ae C40:4	0	0	0	0	0	0	0	0	0	0	0	0	0	0	0	0	0	0	0	0	0	0	0	0	0	0	0	0	0	0	0	0	0	0	0	0	0	0	0	0	0	0	0	0	0	0	0	0
PE ae C40:5	0	0	0	0	0	0	0	0	0	0	0	0	0	0	0	0	0	0	0	0	0	0	0	0	0	0	0	0	0	0	0	0	0	0	0	0	0	0	0	0	0	0	0	0	0	0	0	0
PE ae C40:6	0	0	0	0	0	0	0	0	0	0	0	0	0	0	0	0	0	0	0	0	0	0	0	0	0	0	0	0	0	0	0	0	0	0	0	0	0	0	0	0	0	0	0	0	0	0.23323	0	0.983658
PE ae C42:1	1.40974	1.30135	1.11177	1.32768	0	1.15378	1.12535	1.33062	0	0	1.39579	0	0	0	0	0	0	0	0	0	0	0	0	0	0	0	0	0	0	0	0	1.07146	1.10804	0	1.06935	0	3.3871	3.75929	4.09819	4.52197	1.49674	1.85414	1.69377	1.6949	1.54639	1.80468	1.43094	1.92134
PE ae C42:2	1.94574	1.95378	1.71731	1.93366	1.84363	1.99393	1.88912	1.90346	1.6596	1.64045	2.01584	0	0	0	0	0	1.08695	1.20683	0	1.15023	0	0	0	0	0	0	1.08387	0	1.15243	1.15155	0	1.0986	0	0	0	0	3.856	3.70684	4.25321	4.44629	3.21167	3.52987	3.13202	3.42048	3.0133	3.70735	3.10186	4.25828
PE ae C46:5	0	0	0	0	0	0	0	0	0	0	0	0	0	0	0	0	0	0	0	0	0	0	0	0	0	0	0	0	0	0	0	0	0	0	0	0	0	0	0	0	0	0	0	0	0	0	0	0
PE ae C46:6	0	0	0	0	0	0	0	0	0	0	0	0	0	0	0	0	0	0	0	0	0	0	0	0	0	0	0	0	0	0	0	0	0	0	0	0	0	0	0	0	0	0	0	0	0	0	0	0

## Sheet: Phosohatidylglycerols
Supplemental Table 2 - List of all lipid subspecies - PG
Sample Identification	H1	H2	H3	H4	H5	H6	H7	H8	H9	H10	H11	H12	K1	K2	K3	K4	K5	K6	K7	K8	K9	K10	K11	K12	L1	L2	L3	L4	L5	L6	L7	L8	L9	L10	L11	L12	M1	M2	M3	M4	M5	M6	M7	M8	M9	M10	M11	M12
Species	mouse	mouse	mouse	mouse	mouse	mouse	mouse	mouse	mouse	mouse	mouse	mouse	mouse	mouse	mouse	mouse	mouse	mouse	mouse	mouse	mouse	mouse	mouse	mouse	mouse	mouse	mouse	mouse	mouse	mouse	mouse	mouse	mouse	mouse	mouse	mouse	mouse	mouse	mouse	mouse	mouse	mouse	mouse	mouse	mouse	mouse	mouse	mouse
Material	heart tissue	heart tissue	heart tissue	heart tissue	heart tissue	heart tissue	heart tissue	heart tissue	heart tissue	heart tissue	heart tissue	heart tissue	kidney tissue	kidney tissue	kidney tissue	kidney tissue	kidney tissue	kidney tissue	kidney tissue	kidney tissue	kidney tissue	kidney tissue	kidney tissue	kidney tissue	liver tissue	liver tissue	liver tissue	liver tissue	liver tissue	liver tissue	liver tissue	liver tissue	liver tissue	liver tissue	liver tissue	liver tissue	muscle tissue	muscle tissue	muscle tissue	muscle tissue	muscle tissue	muscle tissue	muscle tissue	muscle tissue	muscle tissue	muscle tissue	muscle tissue	muscle tissue
weight [mg]	114.5	115.6	113.5	117.1	144.3	109.9	157.6	140.6	153.4	65.9	162.5	64.3	65.5	80.4	71.7	67.1	89.1	100.1	112.5	97.2	132.9	115.3	92.9	136.7	165.8	114.4	91.3	133.3	104.8	95.1	82.5	87.9	123.8	85.2	94.6	119.4	68.5	77.7	84.7	69.5	158.2	119.6	137.8	157.4	128.6	139.4	84.2	135
LPG e C14:2	0.259747	0.0854426	0.590837	0.346684	0.387077	0.297037	0.658579	0.344231	0.337565	0.103561	0.36669	0.394857	1.21942	1.23408	1.01274	0.668094	1.63758	1.08904	1.40591	0.955652	0.910564	0.934567	1.43634	1.04081	1.97237	1.59116	1.16647	1.83332	1.45767	1.23723	1.30091	0.590874	0.895314	1.09774	0.41335	1.06673	0	0.0621143	0.0114371	0.0218862	0.210135	0.14446	0	0	0	0	0	0
PG aa C30:0	0	0	0	0	0	0	0	0	0	0	0	0	0	0	0	0	0.0637555	0.056204	0.0444534	0	0	0.0498754	0	0.00153075	0	0	0	0	0	0	0	0	0	0	0	0	0.206369	0.243226	0.14823	0.202861	0.0198117	0	0	0.0502883	0	0	0	0
PG aa C32:0	0.391858	0.221225	0.179447	0.230361	0.215267	0.140056	0.192339	0.241211	0.063184	0.0654583	0.197477	0.00529896	1.97555	1.71235	1.87373	1.59413	3.04348	3.55236	3.72213	3.18691	2.86068	3.48004	3.02494	3.67418	0	0	0	0	0	0	0	0	0.0397678	0	0	0	1.69077	1.72326	0.90283	1.77356	0.712724	0.944531	0.527821	1.33436	0.360172	0.447049	0.327164	0.603088
PG aa C32:1	2.3794	2.01351	2.07636	2.44837	1.62298	0.957425	1.61174	1.16502	1.30147	1.40109	1.60537	0.670228	2.37842	2.73575	1.90244	2.75051	3.32889	3.97231	5.59683	2.93365	2.89966	2.50725	3.68501	4.13591	3.55496	2.29392	3.49422	2.6206	3.56879	4.34433	3.91637	3.48592	4.26167	3.1327	3.18222	4.58805	11.2224	10.9806	6.92239	8.80685	5.40721	6.07849	6.11493	8.50759	3.84632	4.63046	5.07047	6.94737
PG aa C33:6	0	0	0	0	0	0	0	0	0	0	0	0	0	0	0	0	0	0	0	0	0	0	0	0	0	0	0	0	0	0	0	0	0	0	0	0	0	0	0	0	0	0	0	0	0	0	0	0
PG aa C34:0	0	0	0	0	0	0.00767552	0	0.0833825	0	0	0	0	0.158035	0.1149	0.413631	0.160892	0.0723195	0.292303	0.0994372	0.192104	0.0578499	0.136149	0.0894253	0.0789381	0	0	0	0	0	0	0	0	0	0	0	0	0.22838	0.200349	0.204466	0.108498	0	0	0	0.290855	0.00661671	0	0	0.107641
PG aa C34:1	362.363	343.314	338.353	373.578	236.717	223.133	245.941	258.506	206.061	221.942	249.626	112.246	252.445	230.32	267.763	208.014	216.103	236.55	227.353	223.695	199.023	199.028	225.171	244.437	123.997	133.051	155.124	142.395	101.958	133.284	131.124	109.226	109.993	103.824	114.577	93.6615	256.648	223.098	214.086	239.139	161.231	208.036	201.152	191.836	139.008	146.639	122.093	157.304
PG aa C34:2	114.776	107.041	99.9063	119.436	128.721	129.619	128.441	118.202	76.4904	62.3664	99.783	46.6437	23.4389	23.6282	27.6072	19.3033	34.3107	42.2211	40.487	34.0367	28.4878	27.9249	31.693	34.4449	38.7213	39.662	52.5049	33.0139	43.6569	45.0926	39.0475	37.5933	55.5099	46.65	44.8378	39.9858	46.2311	47.6917	40.7138	46.2903	43.1525	49.6858	48.8276	50.1558	31.6314	30.9588	25.8484	37.8098
PG aa C34:3	0	0	0	0	0	0	0	0	0	0	0	0	0	0	0	0	0	0	0	0	0	0	0	0	0	0	0	0	0	0	0	0	0	0	0	0	0	0	0	0	0	0	0	0	0	0	0	0
PG aa C36:0	0	0	0	0	0	0	0	0	0	0	0	0	0	0	0	0	0	0	0	0	0	0	0	0	0	0	0	0	0	0	0	0	0	0	0	0	0	0	0	0	0	0	0	0	0	0	0	0
PG aa C36:1	12.3156	11.6235	9.83014	11.1951	7.96662	7.59252	7.47078	10.2398	6.1714	6.24811	7.27499	2.79778	7.74534	6.93543	8.34499	6.77092	5.72113	7.40721	8.18583	7.6091	5.82734	6.28741	6.92771	7.05355	2.89963	3.63993	4.35223	3.27142	2.37974	3.2714	3.27598	2.5731	2.44255	1.40211	2.08242	2.02412	9.45297	10.2367	8.93306	9.54224	7.6263	9.50701	10.4997	8.32149	7.34137	6.78686	5.74839	6.13262
PG aa C36:2	54.7468	52.9719	50.3761	56.315	45.9637	43.1599	42.6421	45.2299	30.6441	27.9218	36.7413	15.2691	47.7448	44.5253	53.1172	35.7224	46.3014	48.295	41.3319	44.1901	35.5292	32.9595	35.1979	42.0433	20.0305	24.9298	24.0231	22.0746	18.0245	21.3686	19.8546	18.6251	21.859	16.5194	17.4489	16.5384	38.7169	35.7474	34.1539	37.2478	25.5552	31.3631	28.1763	29.9827	19.8643	17.9992	15.4787	22.7799
PG aa C36:3	0	0	0	0	0	0	0	0	0	0	0	0	0	0	0	0	0	0	0	0	0	0	0	0	0	0	0	0	0	0	0	0	0	0	0	0	0	0	0	0	0	0	0	0	0	0	0	0
PG aa C36:4	0	0	0	0	0	0	0	0	0	0	0	0	0	0	0	0	0	0	0	0	0	0	0	0	0	0	0	0	0	0	0	0	0	0	0	0	0	0	0	0	0	0	0	0	0	0	0	0
PG aa C38:5	0	0	0	0	0	0	0	0	0	0	0	0	0	0	0	0	0	0	0	0	0	0	0	0	0	0	0	0	0	0	0	0	0	0	0	0	0	0	0	0	0	0	0	0	0	0	0	0
PG ae C32:0	0	0	0	0	0	0	0	0	0	0	0	0	0	0	0	0	0	0	0	0	0	0	0	0	0	0	0	0	0	0	0	0	0	0	0	0	0	0	0	0	0	0	0	0	0	0	0	0
PG ae C34:0	0	0	0	0	0	0	0	0	0	0	0	0	0	0	0	0	0	0	0	0	0	0	0	0	0	0	0	0	0	0	0	0	0	0	0	0	0	0	0	0	0	0	0	0	0	0	0	0
PG ae C34:1	1.31957	1.58754	1.41848	1.57464	0.91675	1.11151	0.81744	0.959826	0.397809	0.968581	1.27358	0.517244	0.595335	0.586303	0.218361	0.227112	0.543199	0.630335	1.03414	0.821551	0.579048	0.288643	1.32248	0.798056	0.42208	0.0538627	0.284746	0.294557	0.385361	0.0979626	0.234085	0.691864	0.492815	0.511397	0.41335	0.195473	1.9252	1.82219	1.59864	1.8836	0.99511	1.38955	1.15621	2.55151	1.135	1.02119	1.30869	1.2659
PG ae C36:1	5.69711	5.6006	4.53808	5.65994	3.49891	3.15872	3.26844	4.2202	2.78749	2.83025	4.45875	1.54224	2.85392	3.14797	3.80894	2.77501	2.30084	4.13613	2.75782	4.44229	3.41201	3.46209	4.19736	4.10556	0.841951	1.06408	1.6955	1.1534	0.820989	1.13366	1.30091	1.12949	1.44418	1.16672	0.999073	1.46605	3.21801	2.53816	2.12771	3.5126	2.24024	3.00551	2.85194	2.74364	2.02188	1.65812	1.45816	2.44138

## Sheet: Phosphatidylserines
Supplemental Table 2 - List of all lipid subspecies - PS
Sample Identification	H1	H2	H3	H4	H5	H6	H7	H8	H9	H10	H11	H12	K1	K2	K3	K4	K5	K6	K7	K8	K9	K10	K11	K12	L1	L2	L3	L4	L5	L6	L7	L8	L9	L10	L11	L12	M1	M2	M3	M4	M5	M6	M7	M8	M9	M10	M11	M12
Species	mouse	mouse	mouse	mouse	mouse	mouse	mouse	mouse	mouse	mouse	mouse	mouse	mouse	mouse	mouse	mouse	mouse	mouse	mouse	mouse	mouse	mouse	mouse	mouse	mouse	mouse	mouse	mouse	mouse	mouse	mouse	mouse	mouse	mouse	mouse	mouse	mouse	mouse	mouse	mouse	mouse	mouse	mouse	mouse	mouse	mouse	mouse	mouse
Material	heart tissue	heart tissue	heart tissue	heart tissue	heart tissue	heart tissue	heart tissue	heart tissue	heart tissue	heart tissue	heart tissue	heart tissue	kidney tissue	kidney tissue	kidney tissue	kidney tissue	kidney tissue	kidney tissue	kidney tissue	kidney tissue	kidney tissue	kidney tissue	kidney tissue	kidney tissue	liver tissue	liver tissue	liver tissue	liver tissue	liver tissue	liver tissue	liver tissue	liver tissue	liver tissue	liver tissue	liver tissue	liver tissue	muscle tissue	muscle tissue	muscle tissue	muscle tissue	muscle tissue	muscle tissue	muscle tissue	muscle tissue	muscle tissue	muscle tissue	muscle tissue	muscle tissue
weight [mg]	114.5	115.6	113.5	117.1	144.3	109.9	157.6	140.6	153.4	65.9	162.5	64.3	65.5	80.4	71.7	67.1	89.1	100.1	112.5	97.2	132.9	115.3	92.9	136.7	165.8	114.4	91.3	133.3	104.8	95.1	82.5	87.9	123.8	85.2	94.6	119.4	68.5	77.7	84.7	69.5	158.2	119.6	137.8	157.4	128.6	139.4	84.2	135
PS aa C34:1	0	0	0	0	0	0	0	0	0	0	0	0	0	0	0	6.75375	0	0	0	0	0	0	0	0	0	0	0	0	0	0	0	0	0	0	0	0	0	0	0	0	0	0	0	0	0	0	0	0
PS aa C34:2	0	0	0	0	0	0	0	0	0	0	0	0	0	0	0	0	0	0	0	0	0	0	0	0	0	0	0	0	0	0	0	0	0	0	0	0	0	0	0	0	0	0	0	0	0	0	0	0
PS aa C36:0	0	0	0	0	0	0	0	0	0	0	0	0	0	0	0	0	0	0	0	0	0	0	0	0	0	0	0	0	0	0	0	0	0	0	0	0	0	0	0	0	0	0	0	0	0	0	0	0
PS aa C36:1	0	0	0	0	0	0	0	0	0	0	0	0	0	0	0	0	0	0	0	0	0	0	0	0	0	0	0	0	0	0	0	0	0	0	0	0	0	0	0	0	0	0	0	0	0	0	0	0
PS aa C36:2	0	0	0	0	0	0	0	0	0	0	0	0	0	0	0	0	0	0	0	0	0	0	0	0	0	0	0	0	0	0	0	0	0	0	0	0	0	0	0	0	0	0	0	0	0	0	0	0
PS aa C36:3	0	0	0	0	0	0	0	0	0	0	0	0	0	0	0	0	0	0	0	0	0	0	0	0	0	0	0	0	0	0	0	0	0	0	0	0	0	0	0	0	0	0	0	0	0	0	0	0
PS aa C36:4	0	0	0	0	0	0	0	0	0	0	0	0	0	0	0	0	0	0	0	0	0	0	0	0	0	0	0	0	0	0	0	0	0	0	0	0	0	0	0	0	0	0	0	0	0	0	0	0
PS aa C38:1	16.1483	16.1296	16.1494	16.1379	16.1091	16.194	16.1289	16.2246	16.1212	16.1524	16.1257	16.0607	16.2024	16.1644	16.3746	16.3952	16.3048	16.2913	16.3687	16.2924	16.2014	16.2675	16.281	16.3554	16.0482	16.0956	16.1863	16.1391	16.1246	16.0971	16.0619	16.1313	16.0702	16.2032	16.1861	16.1301	16.5199	16.4849	16.4421	16.4578	16.4186	16.4282	16.544	16.54	16.4048	16.48	16.4904	16.4424
PS aa C38:2	0	0	0	0	0	0	0	0	0	0	0	0	0	0	0	0	0	0	0	0	0	0	0	0	0	0	0	0	0	0	0	0	0	0	0	0	0	0	0	0	0	0	0	0	0	0	0	0
PS aa C38:3	18.1438	17.5449	17.4413	17.8365	17.4847	17.3315	17.5496	17.5859	17.1445	17.5418	17.3938	16.3675	20.4116	20.1151	21.7042	21.1621	21.4319	22.55	22.5037	21.6564	20.9693	21.6308	20.3686	21.5652	18.9557	18.481	18.4459	18.8332	18.8512	18.6948	18.9153	18.8368	20.4165	18.8211	19.7201	19.6656	19.574	19.8481	19.4132	19.5199	18.1702	19.0575	18.3431	18.4049	18.1238	18.0541	17.7192	18.26
PS aa C38:4	0	0	0	0	0	0	0	0	0	0	21.638	17.369	131.18	113.671	141.274	141.334	134.321	141.576	133.665	141.208	129.036	139.849	114.482	135.563	58.9106	68.0469	64.8732	68.3152	58.439	65.7128	61.4747	70.5879	86.8451	76.1097	77.8444	80.9637	0	0	0	0	0	0	0	0	0	0	0	0
PS aa C38:5	16.5825	16.4522	16.455	16.7162	16.4313	16.4783	16.5051	16.4234	16.4815	16.4951	16.5204	16.1514	23.2282	22.8898	24.3935	25.0875	25.7361	24.3244	24.4839	24.3039	24.2908	24.2602	23.4457	24.356	21.147	21.8811	21.9937	22.2788	23.2475	23.5049	22.7439	24.496	27.7342	25.5301	28.4493	26.8381	18.0916	17.7458	18.1352	18.1273	18.5096	19.6707	19.0193	18.6118	20.0399	20.6557	20.4731	20.4301
PS aa C40:1	16.0719	16.0566	16.0565	16.1006	16.0714	16.0664	16.06	16.1169	16.0432	16.0688	16.041	0	16.1284	16.1112	16.1407	16.1439	16.1149	16.1388	16.1324	16.1862	16.1119	16.1123	16.1401	16.1689	16.0681	16.0746	16.1202	16.0619	0	16.0656	16.0376	16.0887	16.0695	16.0809	16.0715	16.0447	16.4804	16.2679	16.267	16.2762	16.1252	16.371	16.3076	16.445	16.3096	16.4927	16.5058	16.5765
PS aa C40:2	16.1432	16.1133	16.1002	16.1426	16.1078	16.1038	16.147	16.1447	16.1111	16.1584	16.154	16.0685	16.219	16.1946	16.2199	16.2166	16.2344	16.2124	16.2069	16.2316	16.1535	16.2784	16.1687	16.2121	16.0891	16.1477	16.1551	16.1441	16.1563	16.1662	16.1292	16.1942	16.1975	16.1671	16.1456	16.1242	16.4731	16.3817	16.4129	16.393	16.1646	16.3129	16.368	16.3885	16.3826	16.2851	16.3427	16.4052
PS aa C40:3	16.0496	16.1579	16.0518	16.0601	16.0825	16.1215	16.0585	16.0933	16.0874	16.0428	16.0356	16.049	16.2739	16.112	16.2228	16.2141	0	16.1213	16.2052	0	0	16.0537	16.1323	16.0349	16.0548	16.0758	16.1676	16.1159	16.1168	16.1489	0	16.1319	16.134	16.139	16.1489	16.1254	16.3696	16.2737	16.1334	16.2109	0	16.1608	16.0875	16.1273	16.035	16.1335	16.1778	16.1301
PS aa C40:4	18.3621	17.8133	17.6537	18.1073	16.9295	17.0118	17.4553	17.4133	17.3128	17.5263	17.3328	16.3888	19.8034	19.6021	20.6752	20.382	19.7498	19.9832	19.7833	20.4738	20.6099	21.4373	19.3167	20.5205	17.7775	17.9124	18.1044	17.7971	17.8331	17.8507	18.2862	18.3775	20.3281	18.379	18.886	18.5571	23.4321	24.0078	21.909	23.4894	19.8232	20.3218	20.2326	20.4946	19.5056	19.0071	18.472	19.1742
PS aa C40:5	0	0	0	0	0	0	0	0	0	0	0	0	0	0	0	0	0	0	0	0	0	0	0	0	0	0	0	0	0	0	0	0	0	0	0	0	0	0	0	0	0	0	0	0	0	0	0	0
PS aa C40:6	0	0	0	0	0	0	0	0	0	0	0	0	0	0	0	0	50.9323	0	0	0	0	0	0	0	0	0	52.1257	0	53.8895	50.874	52.4633	48.2877	54.8196	44.3855	49.4301	50.0272	64.0077	70.6683	57.0473	69.5535	78.6116	70.8279	62.0032	80.1941	58.5997	63.2525	58.7302	66.6798
PS aa C40:7	16.9103	16.8995	16.707	17.0055	16.6944	16.7291	16.7532	16.7644	16.6396	16.8203	16.857	16.2167	18.1382	18.1771	18.2765	18.1514	18.86	18.3816	18.5097	18.3504	18.2786	18.3121	18.3101	18.5858	17.5815	17.8818	18.098	17.8515	18.8979	18.531	18.1528	18.9628	20.1778	19.6307	20.9922	19.9794	19.4659	19.8325	19.4056	20.0384	18.9403	18.8203	18.509	19.5178	19.2164	19.7759	19.3712	20.262
PS aa C42:1	16.0707	16.0497	16.0678	16.066	16.0447	16.0637	16.0486	16.056	16.0436	16.0562	16.0587	16.0416	16.0591	16.0575	16.0932	16.0494	16.065	16.0584	16.051	16.049	16.0446	16.0597	16.0502	16.0675	0	16.0429	16.0473	0	16.0571	16.035	16.0409	16.0435	16.052	16.036	16.0394	16.0551	16.2488	16.1582	16.2686	16.1352	16.1142	16.2064	16.2202	16.2306	16.4446	16.4252	16.503	16.5111
PS aa C42:2	16.0636	16.0481	16.0435	16.0719	0	16.0364	16.056	16.0698	16.054	16.0525	16.0534	16.0478	16.0638	16.0901	16.0743	16.0807	16.0599	16.063	16.0737	16.0732	16.0909	16.0542	16.0719	16.0514	16.0433	0	16.0376	0	16.0487	16.0464	16.037	16.0509	16.0554	16.0427	16.0523	16.0473	16.2866	16.2753	16.2116	16.149	16.1134	16.1595	16.16	16.1666	16.214	16.2354	16.2264	16.205
PS aa C42:4	16.1167	16.0856	16.0737	16.1362	16.0755	16.0917	16.0791	16.0817	16.0763	16.0462	16.1094	16.0395	16.1473	16.1167	16.2013	16.1974	16.1195	16.1825	16.1295	16.1859	16.1752	16.1999	16.1456	16.1688	16.0817	16.1107	16.114	16.1284	16.0721	16.0695	16.0664	16.0936	16.1106	16.0652	16.1062	16.1075	16.1797	16.1392	16.1271	16.1388	16.1041	16.1139	16.096	16.1093	16.115	16.1504	16.1206	16.0893
PS aa C42:5	16.1221	16.1501	16.1288	16.1902	16.1023	16.116	16.1427	16.1489	16.1725	16.143	16.1376	16.0362	16.2363	16.2103	16.2208	16.2214	16.1885	16.1983	16.1852	16.2497	16.2245	16.3468	16.1745	16.2314	16.1031	16.1799	16.1527	16.1779	16.1299	16.2242	16.2076	16.1801	16.2482	16.228	16.1714	16.2315	16.3469	16.2528	16.3072	16.2444	16.1816	16.2516	16.2568	16.2211	16.2731	16.2354	16.1892	16.3232
PS ae C34:2	2.21171	2.19509	2.20755	2.19922	2.20928	2.19853	2.19846	2.21303	2.19787	2.20032	2.19892	2.19502	2.27535	2.22865	2.331	2.26719	2.28178	2.34443	2.31851	2.29986	2.29144	2.29231	2.27591	2.28871	2.19638	2.20073	2.20066	2.19652	2.20098	0	0	2.21142	2.20349	2.2093	2.21291	2.20448	2.24685	2.26078	2.25967	2.23392	2.24629	2.28521	2.25927	2.29548	2.28178	2.30718	2.30086	2.30411
PS ae C36:1	16.1143	16.0947	16.0814	16.0874	16.1113	16.0978	16.0927	16.0947	16.0938	16.0905	16.1262	16.0465	16.3692	16.4128	16.325	16.389	16.4238	16.4449	16.4169	16.4801	16.417	16.3632	16.437	16.4392	16.1084	16.1261	16.1387	16.115	16.1039	16.1211	16.1075	16.1731	16.3749	16.1363	16.2047	16.1134	16.3779	16.3328	16.3094	16.2452	16.1847	16.3437	16.2365	16.343	16.4993	16.5154	16.5043	16.612
PS ae C36:2	16.0675	16.0716	16.0584	16.0499	16.0982	16.0881	16.0915	16.0698	16.0612	16.0525	16.0955	16.0439	16.2442	16.2825	16.4427	16.3983	16.3859	16.3992	16.4288	16.4761	16.2495	16.3119	16.3285	16.3309	16.0813	16.0429	16.0638	16.094	16.0703	16.1166	16.1016	16.1755	16.1701	16.1148	16.1764	16.1519	16.2909	16.2393	16.2236	16.1808	16.1561	16.2253	16.3271	16.3637	16.4209	16.3243	16.4204	16.4504
PS ae C38:4	16.1378	16.103	16.0806	16.1201	16.1229	16.1081	16.1427	16.178	16.1079	16.1363	16.1376	16.0593	17.5971	17.4222	17.7406	17.6448	17.6436	17.958	17.8986	18.278	17.8569	17.8317	17.8364	18.0363	16.5651	16.7964	16.707	16.8216	16.8016	16.7951	16.6639	16.9692	17.3408	17.1598	17.4374	17.1871	16.2004	16.2078	16.1997	16.1949	16.139	16.1639	16.1468	16.1624	16.2055	16.1085	16.1067	16.1687

## Sheet: Spingomyelines
Supplemental Table 2 - List of all lipid subspecies - SM
Sample Identification	H1	H2	H3	H4	H5	H6	H7	H8	H9	H10	H11	H12	K1	K2	K3	K4	K5	K6	K7	K8	K9	K10	K11	K12	L1	L2	L3	L4	L5	L6	L7	L8	L9	L10	L11	L12	M1	M2	M3	M4	M5	M6	M7	M8	M9	M10	M11	M12
Species	mouse	mouse	mouse	mouse	mouse	mouse	mouse	mouse	mouse	mouse	mouse	mouse	mouse	mouse	mouse	mouse	mouse	mouse	mouse	mouse	mouse	mouse	mouse	mouse	mouse	mouse	mouse	mouse	mouse	mouse	mouse	mouse	mouse	mouse	mouse	mouse	mouse	mouse	mouse	mouse	mouse	mouse	mouse	mouse	mouse	mouse	mouse	mouse
Material	heart tissue	heart tissue	heart tissue	heart tissue	heart tissue	heart tissue	heart tissue	heart tissue	heart tissue	heart tissue	heart tissue	heart tissue	kidney tissue	kidney tissue	kidney tissue	kidney tissue	kidney tissue	kidney tissue	kidney tissue	kidney tissue	kidney tissue	kidney tissue	kidney tissue	kidney tissue	liver tissue	liver tissue	liver tissue	liver tissue	liver tissue	liver tissue	liver tissue	liver tissue	liver tissue	liver tissue	liver tissue	liver tissue	muscle tissue	muscle tissue	muscle tissue	muscle tissue	muscle tissue	muscle tissue	muscle tissue	muscle tissue	muscle tissue	muscle tissue	muscle tissue	muscle tissue
weight [mg]	114.5	115.6	113.5	117.1	144.3	109.9	157.6	140.6	153.4	65.9	162.5	64.3	65.5	80.4	71.7	67.1	89.1	100.1	112.5	97.2	132.9	115.3	92.9	136.7	165.8	114.4	91.3	133.3	104.8	95.1	82.5	87.9	123.8	85.2	94.6	119.4	68.5	77.7	84.7	69.5	158.2	119.6	137.8	157.4	128.6	139.4	84.2	135
SM C14:0	0	0	0	0	0	0	0	0	0	0	0	0	0	0	0	0	0	0	0	0	0	0	0	0	0	0	0	0	0	0	0	0	0	0	0	0	0	0	0	0	0	0	0	0	0	0	0	0
SM C15:0	0	0	0	0	0	0	0	0	0	0	0	0	0	0	0	0	0	0	0	0	0	0	0	0	0	0	0	0	0	0	0	0	0	0	0	0	0	0	0	0	0	0	0	0	0	0	0	0
SM C16:0	20.7092	18.5287	17.1854	17.8195	13.2767	12.9626	14.8016	13.7105	16.5074	16.8446	14.9382	6.82217	104.902	97.5961	110.662	111.166	123.153	135.338	130.126	127.889	111.459	90.3317	109.698	115.19	15.1746	16.7159	16.6225	17.7217	14.7616	14.9693	15.4279	17.1065	30.308	17.5198	20.841	19.1881	13.2829	16.1595	17.2946	13.5939	9.10749	12.0948	10.365	9.87471	14.1727	12.3354	9.89544	13.6652
SM C16:1	0	0	0	0	0	0	0	0	0	0	0	0	30.2576	29.3488	33.6699	30.363	31.6918	33.2686	34.8414	32.8223	30.1207	24.7871	28.5156	29.9935	0	0	0	0	0	0	0	0	0	0	0	0	0	0	0	0	0	0	0	0	0	0	0	0
SM C17:0	0	0	0	0	0	0	0	0	0	0	0	0	0	0	0	0	0	0	0	0	0	0	0	0	0	0	0	0	0	0	0	0	0	0	0	0	0	0	0	0	0	0	0	0	0	0	0	0
SM C18:0	10.5728	9.51077	8.2557	9.98754	6.59552	6.17805	7.36995	6.66142	6.4545	7.44488	6.57136	0	0	5.95594	0	0	0	6.06172	0	6.07313	0	0	0	0	0	0	0	0	0	0	0	0	0	0	0	0	20.5492	29.3394	18.3097	24.655	27.805	27.8668	25.259	28.9596	21.1715	23.9054	20.4619	20.71
SM C18:1	0	0	0	0	0	0	0	0	0	0	0	0	0	0	0	0	0	0	0	0	0	0	0	0	0	0	0	0	0	0	0	0	0	0	0	0	0	0	0	0	0	0	0	0	0	0	0	0
SM C19:0	0	0	0	0	0	0	0	0	0	0	0	0	0	0	0	0	0	0	0	0	0	0	0	0	0	0	0	0	0	0	0	0	0	0	0	0	0	0	0	0	0	0	0	0	0	0	0	0
SM C19:1	0	0	0	0	0	0	0	0	0	0	0	0	0	0	0	0	0	0	0	0	0	0	0	0	0	0	0	0	0	0	0	0	0	0	0	0	0	0	0	0	0	0	0	0	0	0	0	0
SM C19:2	0	0	0	0	0	0	0	0	0	0	0	0	0	0	0	0	0	0	0	0	0	0	0	0	0	0	0	0	0	0	0	0	0	0	0	0	0	0	0	0	0	0	0	0	0	0	0	0
SM C20:0	0	0	0	0	0	0	0	0	0	0	0	0	0	0	0	0	0	0	0	0	0	0	0	0	0	0	0	0	0	0	0	0	0	0	0	0	0	0	0	0	0	0	0	0	0	0	0	0
SM C20:1	0	0	0	0	0	0	0	0	0	0	0	0	0	0	0	0	0	0	0	0	0	0	0	0	0	0	0	0	0	0	0	0	0	0	0	0	0	0	0	0	0	0	0	0	0	0	0	0
SM C20:2	0	0	0	0	0	0	0	0	0	0	0	0	0	0	0	0	0	0	0	0	0	0	0	0	0	0	0	0	0	0	0	0	0	0	0	0	0	0	0	0	0	0	0	0	0	0	0	0
SM C21:0	0	0	0	0	0	0	0	0	0	0	0	0	0	0	0	0	0	0	0	0	0	0	0	0	0	0	0	0	0	0	0	0	0	0	0	0	0	0	0	0	0	0	0	0	0	0	0	0
SM C21:1	0	0	0	0	0	0	0	0	0	0	0	0	0	0	0	0	0	0	0	0	0	0	0	0	0	0	0	0	0	0	0	0	0	0	0	0	0	0	0	0	0	0	0	0	0	0	0	0
SM C21:2	0	0	0	0	0	0	0	0	0	0	0	0	0	0	0	0	0	0	0	0	0	0	0	0	0	0	0	0	0	0	0	0	0	0	0	0	0	0	0	0	0	0	0	0	0	0	0	0
SM C21:3	0	0	0	0	1.97512	0	0	0	0	0	0	2.00151	0	0	0	0	0	0	0	0	0	0	0	0	1.98431	0	0	0	0	0	0	1.97777	0	0	0	0	1.98255	0	0	0	0	0	0	1.99004	0	0	0	0
SM C22:0	0	0	0	0	0	0	0	0	0	0	0	0	8.45456	8.56478	8.39335	9.61514	9.40935	10.9023	10.0815	10.2997	8.61462	8.90002	8.44415	8.7326	10.1712	10.2951	10.8178	10.1579	13.3546	13.5439	11.9085	12.6518	11.8351	10.814	10.259	12.6862	0	0	0	0	0	0	0	0	0	0	0	0
SM C22:1	0	0	0	0	0	0	0	0	0	0	0	0	8.59579	8.00927	8.24815	8.70669	8.49557	9.40138	9.20691	9.08553	8.24008	7.05407	8.80442	7.87197	6.19511	6.26543	5.56634	6.66627	7.53738	5.82219	8.02421	8.12449	9.17105	9.40192	11.927	8.45256	0	0	0	0	0	0	0	0	0	0	0	0
SM C22:2	0	0	0	0	0	0	0	0	0	0	0	0	0	0	0	0	0	0	0	0	0	0	0	0	0	0	0	0	0	0	0	0	0	0	0	0	0	0	0	0	6.89445	0	0	0	0	0	0	5.96485
SM C22:3	2.04024	1.98552	1.97586	2.04532	0	0	1.97147	2.03224	0	1.98474	1.97349	0	0	0	0	0	2.04239	2.01272	0	0	0	0	0	0	0	2.2086	0	0	2.26678	0	0	2.15085	0	0	0	2.02319	0	0	0	2.00078	0	0	0	1.99045	1.98194	0	0	0
SM C23:0	0	0	0	0	0	0	0	0	0	0	0	0	0	0	0	0	0	0	0	0	0	0	0	0	0	0	0	0	0	0	0	0	0	0	0	0	0	0	0	0	0	0	0	0	0	0	0	0
SM C23:1	0	0	0	0	0	0	0	0	0	0	0	0	0	0	0	0	0	0	0	0	0	0	0	0	0	0	0	0	0	0	0	0	0	0	0	0	0	0	0	0	0	0	0	0	0	0	0	0
SM C23:2	1.98076	2.01055	0	2.1049	2.06443	2.01111	2.07397	2.01549	0	2.08846	0	0	0	0	0	0	0	0	0	0	0	0	2.04353	0	2.06539	2.07253	1.98807	2.07922	1.99948	0	1.98226	2.08058	2.0373	0	1.99837	2.05191	1.98832	2.00751	2.08047	2.00833	2.0623	0	2.05202	0	1.97843	2.0706	2.03588	0
SM C23:3	0	0	0	0	1.98675	0	0	0	0	0	0	0	0	0	2.10235	2.01534	0	0	0	0	0	0	0	0	1.99593	0	0	0	0	0	0	0	0	0	0	0	0	0	0	0	0	0	0	0	0	0	0	0
SM C24:0	0	0	0	0	0	0	0	0	0	0	0	0	6.2116	5.83076	6.65919	7.12048	6.93512	7.34994	6.30478	6.69171	6.01092	6.01749	0	5.9707	0	0	0	0	0	0	0	0	0	0	0	0	0	0	0	0	0	0	0	0	0	0	0	0
SM C24:1	0	0	0	0	0	0	0	0	0	0	0	0	14.0906	12.9128	15.2023	14.9427	14.3248	16.7181	14.5822	14.3205	12.9074	13.2706	13.0999	13.8565	8.0199	10.3112	9.78964	9.80798	7.64288	8.60305	7.39438	9.72996	12.3641	9.41239	10.3785	11.1258	6.07105	6.09064	7.03491	0	0	0	0	0	0	0	0	0
SM C24:2	6.37374	0	0	0	0	0	0	0	0	0	0	0	9.19039	8.23237	9.13039	10.4517	9.11037	10.2313	9.44639	9.81905	8.771	8.53666	9.68874	9.14309	0	0	0	0	0	0	0	0	7.30208	0	6.13233	6.61687	0	0	0	0	0	0	0	0	0	0	0	0
SM C24:3	0	0	0	0	0	0	0	0	0	0	0	0	0	0	0	0	0	0	0	0	0	0	0	0	0	0	0	0	0	0	0	0	0	0	0	0	0	0	0	0	0	0	0	0	0	0	0	0
SM C24:4	0	0	0	0	0	0	0	0	0	0	0	0	0	0	0	0	0	6.75657	0	0	0	0	0	0	0	0	0	0	0	0	0	0	0	0	0	0	0	0	0	0	0	0	0	0	0	0	0	0
SM C26:3	3.26576	3.22245	3.19142	3.23701	2.95524	2.98755	3.16182	2.9659	3.07233	2.78405	3.41789	2.27118	2.46984	2.32929	2.32125	2.51378	2.64797	2.70963	2.63026	2.54865	2.63128	2.51759	2.44404	2.64063	2.30687	2.49182	2.37724	2.58785	2.42317	2.28585	2.45013	2.40782	2.46393	2.25819	2.40195	2.55021	2.39384	2.28066	2.46298	2.37219	2.56794	2.42614	2.51677	2.17193	2.34322	2.60692	2.20736	2.64188
SM C26:4	0	0	0	0	0	0	0	0	0	0	0	0	0	0	0	0	0	0	0	0	0	0	0	0	0	0	0	0	0	0	0	0	0	0	0	0	0	0	0	0	0	0	0	0	0	0	0	0
SM C3:0	0	0	0	0	0	0	0	0	0	0	0	0	0	0	0	0	0	0	0	0	0	0	0	0	0	0	0	0	0	0	0	0	0	0	0	0	0	0	0	0	0	0	0	0	0	0	0	0

## Sheet: Ceramides
Data Set 2 - List of all lipid subspecies - C
Sample Identification	H1	H2	H3	H4	H5	H6	H7	H8	H9	H10	H11	H12	K1	K2	K3	K4	K5	K6	K7	K8	K9	K10	K11	K12	L1	L2	L3	L4	L5	L6	L7	L8	L9	L10	L11	L12	M1	M2	M3	M4	M5	M6	M7	M8	M9	M10	M11	M12
Species	mouse	mouse	mouse	mouse	mouse	mouse	mouse	mouse	mouse	mouse	mouse	mouse	mouse	mouse	mouse	mouse	mouse	mouse	mouse	mouse	mouse	mouse	mouse	mouse	mouse	mouse	mouse	mouse	mouse	mouse	mouse	mouse	mouse	mouse	mouse	mouse	mouse	mouse	mouse	mouse	mouse	mouse	mouse	mouse	mouse	mouse	mouse	mouse
Material	heart tissue	heart tissue	heart tissue	heart tissue	heart tissue	heart tissue	heart tissue	heart tissue	heart tissue	heart tissue	heart tissue	heart tissue	kidney tissue	kidney tissue	kidney tissue	kidney tissue	kidney tissue	kidney tissue	kidney tissue	kidney tissue	kidney tissue	kidney tissue	kidney tissue	kidney tissue	liver tissue	liver tissue	liver tissue	liver tissue	liver tissue	liver tissue	liver tissue	liver tissue	liver tissue	liver tissue	liver tissue	liver tissue	muscle tissue	muscle tissue	muscle tissue	muscle tissue	muscle tissue	muscle tissue	muscle tissue	muscle tissue	muscle tissue	muscle tissue	muscle tissue	muscle tissue
weight [mg]	114.5	115.6	113.5	117.1	144.3	109.9	157.6	140.6	153.4	65.9	162.5	64.3	65.5	80.4	71.7	67.1	89.1	100.1	112.5	97.2	132.9	115.3	92.9	136.7	165.8	114.4	91.3	133.3	104.8	95.1	82.5	87.9	123.8	85.2	94.6	119.4	68.5	77.7	84.7	69.5	158.2	119.6	137.8	157.4	128.6	139.4	84.2	135
N-C10:0(OH)-Cer	0	0	0	0	0	0	0	0	0	0	0	0	0	0	0	0	0	0	0	0	0	0	0	0	0	0	0	0	0	0	0	0	0	0	0	0	0	0	0	0	0	0	0	0	0	0	0	0
N-C10:0(OH)-Cer(2H)	0	0	0	0	0	0	0	0	0	0	0	0	0	0	0	0	0	0	0	0	0	0	0	0	0	0	0	0	0	0	0	0	0	0	0	0	0	0	0	0	0	0	0	0	0	0	0	0
N-C10:0-Cer	0.141764	0.113311	0.140164	0.140039	0.116728	0.138461	0.159266	0.154701	0.0888529	0.0611723	0.118562	0.106953	0.434066	0.408249	0.389546	0.401743	0.370115	0.38099	0.38762	0.352888	0.313703	0.320886	0.383401	0.300309	0.966146	0.90309	0.75546	0.858506	0.668968	0.928646	0.947943	0.819511	0.670319	0.539172	0.718005	0.572192	0.0657022	0.0852265	0.0687617	0.0654295	0.0609786	0.0572134	0.0496079	0.0577252	0.0583553	0.0453188	0.0514788	0.0407511
N-C10:0-Cer(2H)	0	0	0	0	0	0	0	0	0	0	0	0	0	0	0	0	0	0	0	0	0	0	0	0	0	0	0	0	0	0	0	0	0	0	0	0	0	0	0.000537332	0	0	0	0	0	0	0	0	0
N-C10:1-Cer	0	0	0	0	0	0	0	0	0	0	0	0	0	0	0	0	0	0	0	0	0	0	0	0	0	0	0	0	0	0	0	0	0	0	0	0	0	0	0	0	0	0	0	0	0	0	0	0
N-C10:1-Cer(2H)	0	0	0	0.000765182	0	0	0	0	0	0	0	0	0	0	0	8.7366e-05	0	0	0	0	0	0	0	0	0.000337957	0	0	4.694e-05	0.000234649	0	0	0	0	0	0	0	0	0.000339616	0	0	0.000674622	0	0	0	0.000249689	0	0	0
N-C11:0(OH)-Cer	0	0	0	0	0	0	0	0	0	0	0	0	0	0.00187295	0	0	0	0	0	0.00543763	0	0	0	0	0.00544227	0	0	0	0	0	0	0	0	0	0	0	0	0	0	0	0	0	0	0	0	0	0	0
N-C11:0(OH)-Cer(2H)	0	0	0	0	0	0	0	0	0	0	0	0	0	0.00505021	0	0	0	0	0	0	0	0	0	0	0	0	0	0	0	0	0	0	0	0	0	0	0	0	0	0	0	0	0	0	0	0	0.00091936	0
N-C11:0-Cer	0	0	0	0	0	0	0	0	0	0	0	0	0	0.00505021	0	0	0	0	0	0	0	0	0	0	0	0	0	0	0	0	0	0	0	0	0	0	0	0	0	0	0	0	0	0	0	0	0	0
N-C11:0-Cer(2H)	0	0	0	0	0	0	0	0	0.000467848	0	0	0	0.000309854	0	0	0	0	0	0	0	0.000166348	0.000924687	0	0	0	0	0	0	0	0	0	0	0	0	0	0	0	0	0	0	0	0	0	0	0	0	0	0
N-C11:1-Cer	0	0	0	0	0	0	0	0	0	0	0	0	0	0	0	0	0	0	0	0	0	0	0	0	0	0	0	0	0	0	0	0	0	0	0	0	0	0	0	0	0	0	0	0	0	0	0	0
N-C11:1-Cer(2H)	0	0	0	0	0	0	0	0	0	0	0	0	0	0	0	0	0	0	0	0	0	0	0	0	0	0	0	0	0	0	0	0	0	0	0	0	0	0	0	0	0	0	0	0	0	0	0	0
N-C12:0(OH)-Cer	0	0	0	0	0	0	0	0	0	0	0	0	0	0	0	0	0	0	0	0	0	0	0	0	0	0	0	0	0	0	0	0	0	0	0	0	0	0	0	0	0	0	0	0	0	0	0	0
N-C12:0-Cer	0.356944	0.343435	0.392499	0.369385	0.360039	0.358434	0.372167	0.40738	0.319173	0.278056	0.376276	0.655272	0.690861	0.676446	0.652089	0.712491	0.582912	0.532069	0.616903	0.584572	0.590938	0.574727	0.653373	0.516038	1.00057	0.719186	0.669099	0.67508	0.594529	0.618744	0.637158	0.629857	0.71477	0.634147	0.669694	0.596499	0.196623	0.191895	0.205811	0.187591	0.177953	0.152401	0.130399	0.162453	0.167042	0.141566	0.157867	0.154941
N-C12:0-Cer(2H)	0	0	0	0.000245637	0	0	0.00247243	0.00163848	0	0	0	0	0	0	0.00537112	0	0	0.00276184	0	0.000878423	0.00156487	0	0.0017266	0.000854892	0.00556102	0	0	0	0.00104552	0	0	0.00458486	0	0.00328177	0	0	0	0.00116321	0	0	0.00102366	0	0	0	0	0	0	0
N-C12:1-Cer	0	0	0	0	0	0	0	0	0	0	0	0	0	0	0	0	0	0	0	0	0	0	0	0	0	0	0	0	0	0	0	0	0	0	0	0	0	0	0	0	0	0	0	0	0	0	0	0
N-C12:1-Cer(2H)	0	0	0.000122512	0	0	0	0	0	0	0	0	0	0	0	0	0	0.000891954	0.000372904	0	0	0	0	0	0	0	0.00116211	0	0	0	0	0	0	0	0	0	0	0.000658375	0	0	0	0	0	0	0	0	0	2.93932e-05	0
N-C13:0(OH)-Cer	0	0	0	0	0	0	0	0	0	0	0	0	0	0	0	0	0	0	0	0	0	0	0	0	0	0	0	0	0	0	0	0	0	0	0	0	0	0	0	0	0	0	0	0	0	0	0	0
N-C13:0(OH)-Cer(2H)	0	0	0	0	0	0	0	0	0	0	0	0	0	0	0	0	0	0	0	0	0	0	0	0	0	0	0	0	0	0	0	0	0	0	0	0	0	0	0	0	0	0	0	0	0	0	0	0
N-C13:0-Cer	0	0	0	0	0	0	0	0	0	0	0	0	0	0	0	0	0	0	0	0	0	0	0	0	0	0	0	0	0	0	0	0	0	0	0	0	0	0	0	0	0	0	0	0	0	0	0	0
N-C13:0-Cer(2H)	0	0	0	0	0	0	0	0	0	0	0	0	0	0	0	0	0	0	0	0	0	0	0	0	0	0	0	0	0	0	0	0	0	0	0	0	0	0	0	0	0	0	0	0	0	0	0	0
N-C13:1-Cer	0	0	0	0	0	0	0	0	0	0	0	0	0	0	0	0	0	0	0	0	0	0	0	0	0	0	0	0	0	0	0	0	0	0	0	0	0	0	0	0	0	0	0	0	0	0	0	0
N-C13:1-Cer(2H)	0	0	0	0	0	0	0	0	0	0	0	0	0	0	0	0	0	0	0	0	0	0	0	0	0	0	0	0	0	0	0	0	0	0	0	0	0	0	0	0	0	0	0	0	0	0	0	0
N-C14:0(OH)-Cer	0	0	0	0	0	0	0	0	0	0	0	0	0	0	0	0	0	0	0	0	0	0	0	0	0	0	0	0	0	0	0	0	0	0	0	0	0	0	0	0	0	0	0	0	0	0	0	0.0012246
N-C14:0(OH)-Cer(2H)	0	0	0	0	0	0	0	0	0	0	0	0	0	0	0	0	0	0	0	0	0	0	0	0	0	0	0	0	0	0	0	0	0	0	0	0	0	0	0	0	0	0	0	0	0	0	0	0
N-C14:0-Cer	0.00781018	0.0125773	0.00426614	0.0250021	0.00593626	0.0081065	0.00803876	0.0171071	0.00658578	0.00339112	0.0146853	0.00100548	0.0521359	0.0405575	0.0549235	0.0590446	0.0545131	0.0467247	0.08856	0.0533415	0.0354635	0.0551527	0.0350518	0.0412764	0.0543783	0.061335	0.0384136	0.0902282	0.0305611	0.0220756	0.024695	0.0355235	0.0535589	0.0514307	0.0393145	0.0312164	0.0190452	0.0159992	0.0104117	0.0152151	0.0131058	0.0105459	0.00459418	0.0158687	0.0117797	0.00866046	0.0117189	0.0109981
N-C14:0-Cer(2H)	0	0	0	0	0	0	0	0	0	0	0	0	0	0	0	0	0	0	0	0	0	0	0	0	0	0	0	0	0	0	0	0	0	0	0	0	0	0	0	0	0	0	0	0	0	0	0	0
N-C14:1-Cer	0	0	0	0	0	0	0	0	0	0	0	0	0	0	0	0	0	0	0	0	0	0	0	0	0	0	0	0	0	0	0	0	0	0	0	0	0	0	0	0	0	0	0	0	0	0	0	0
N-C14:1-Cer(2H)	0	0	0	0	0	0	0	0	0	0	0	0	0	0	0	0	0	0	0	0	0	0	0	0	0	0	0	0	0	0	0	0	0	0	0	0	0	0	0	0	0	0	0	0	0	0	0	0
N-C15:0(OH)-Cer	0	0	0	0	0	0	0	0	0	0	0	0	0	0	0	0	0	0	0	0	0	0	0	0	0	0	0	0	0	0	0	0	0	0	0	0	0	0	0	0	0	0	0	0	0	0	0	0
N-C15:0(OH)-Cer(2H)	0	0	0	0	0	0	0	0	0	0	0	0	0	0	0	0	0	0	0	0	0	0	0	0	0	0	0	0	0	0	0	0	0	0	0	0	0	0	0	0	0	0	0	0	0	0	0	0
N-C15:0-Cer	0.000692494	0.0021058	0.00404619	0.00236839	0	7.8474e-05	0.0036593	0.00388223	0.000964506	0	0.00237694	0	0.00643496	0.00690167	0.0109599	0.00433658	0.00900623	0.0134892	0.00522046	0.00904387	0.00956147	0.0177124	0.00947354	0.0158483	0.00794261	0.00387888	0	0.00260898	0.00214225	0.00259991	0.00449285	0.00778779	0.00579606	0.00276423	0.00786637	0.00773428	0.00237468	0.00162264	0	0	0.00382317	4.83524e-05	0	0.000707953	0	0	0.000624107	0
N-C15:0-Cer(2H)	0	0	0	0	0	0	0	0	0	0	0	0	0	0	0	0	0	0	0	0	0	0	0	0	0	0	0	0	0	0	0	0	0	0	0	0	0	0	0	0	0	0	0	0	0	0	0	0
N-C15:1-Cer	0	0	0	0	0	0	0	0	0	0	0	0	0	0	0	0	0	0	0	0	0	0	0	0	0	0	0	0	0	0	0	0	0	0	0	0	0	0	0	0	0	0	0	0	0	0	0	0
N-C15:1-Cer(2H)	0	0	0	0	0	0	0	0	0	0	0	0	0	0	0	0	0	0	0	0	0	0	0	0	0	0	0	0	0	0	0	0	0	0	0	0	0	0	0	0	0	0	0	0	0	0	0	0
N-C16:0(OH)-Cer	0	0	0	0	0	0	0	0	0	0	0	0	0	0	0	0	0	0	0.0137756	0	0.106551	0.0507467	0	0	0	0	0	0	0	0	0	0	0	0	0	0	0	0	0	0	0	0	0	0	0.00105607	0	0.00397064	0
N-C16:0(OH)-Cer(2H)	0	0	0	0	0	0	0	0	0	0	0	0	0	0	0	0	0	0	0	0.00893434	0.0150361	0	0	0	0	0	0	0	0	0	0	0	0.000677505	0	0	0	0	0	0	0	0	0	0	0	0	0	0	0
N-C16:0-Cer	1.2051	1.1646	1.00763	1.16971	0.783787	0.644099	1.01813	0.82524	0.488365	0.441981	0.739971	0.149466	6.88091	5.65727	7.56035	7.21889	7.99204	7.98361	10.7646	10.6377	6.83217	9.80139	6.19944	7.7789	2.56034	2.71616	2.18855	3.20634	2.1457	2.09707	2.48084	2.90439	4.25757	2.23497	2.69906	2.58484	0.628059	0.853746	0.47764	0.735519	0.203996	0.301065	0.264928	0.300784	0.234106	0.169006	0.133614	0.181643
N-C16:0-Cer(2H)	0	0	0	0	0	0	0	0	0	0	0	0	0.020532	0	0.0104126	0.00576526	0.000370256	0.0133826	0.03075	0.0105151	0.0175772	0.00632969	0	0.00220925	0.0190099	0.00321568	0	0.0330719	0.00833821	0.00707463	0.0134185	0.0104547	0.0214838	0.00523691	0.0011439	0	0	0	0	0	0	0	0	0	0	0	0	0
N-C16:1-Cer	0	0	0	0	0	0	0	0	0	0	0	0	0	0	0	0	0	0	0	0	0	0	0	0	0	0	0	0	0	0	0	0	0	0	0	0	0	0	0	0	0	0	0	0	0	0	0	0
N-C16:1-Cer(2H)	0	0	0	0	0	0	0	0	0	0	0	0	0	0	0	0	0	0	0	0	0	0	0	0	0	0	0	0	0	0	0	0	0	0	0	0	0	0	0	0	0	0	0	0	0	0	0	0
N-C17:0(OH)-Cer	0	0	0	0	0	0	0	0	0	0	0	0	0	0	0	0	0	0	0	0	0	0	0	0	0	0	0	0	0	0	0	0	0	0	0	0	0.0817301	0	0.00705797	0.00453312	0	0.00245998	0	0	0.135362	0	0	0.0312187
N-C17:0(OH)-Cer(2H)	0	0	0	0	0	0	0	0	0	0	0	0	0	0	0	0	0	0	0	0	0	0	0	0	0	0	0	0	0	0	0	0	0	0	0	0	0	0	0	0	0	0	0	0	0	0	0	0
N-C17:0-Cer	0	0.023139	0	0.0205108	0	0	0	0	0	0	0	0	0	0	0	0.0258512	0	0.0207047	0.0258512	0.0260549	0.0219723	0.0258695	0	0.029839	0	0.0209057	0	0	0	0	0	0.021123	0.025285	0	0.0209578	0	0	0	0	0	0	0	0.0205693	0	0	0.0139092	0.0122991	0.0117956
N-C17:0-Cer(2H)	0	0	0	0	0	0	0	0	0	0	0	0	0	0	0	0	0	0	0	0	0	0	0	0	0	0	0	0	0	0	0	0	0	0	0	0	0	0	0	0	0	0	0	0	0	0	0	0
N-C17:1-Cer	0	0	0	0	0	0	0	0	0	0	0	0	0	0	0	0	0	0	0	0	0	0	0	0	0	0	0	0	0	0	0	0	0	0	0	0	0	0	0	0	0	0	0	0	0	0	0	0
N-C17:1-Cer(2H)	0	0	0	0	0	0	0	0	0	0	0	0	0	0	0	0	0	0	0	0	0	0	0	0	0	0	0	0	0	0	0	0	0	0	0	0	0	0	0	0	0	0	0	0	0	0	0	0
N-C18:0(OH)-Cer	0	0	0	0	0	0	0	0	0	0	0	0	0	0	0	0	0	0	0	0	0	0	0	0	0	0	0	0	0	0	0	0	0	0	0	0	0	0	0	0	0	0	0	0	0	0	0	0
N-C18:0(OH)-Cer(2H)	0	0	0	0	0	0	0	0	0	0	0	0	0	0	0	0	0	0	0	0	0	0	0	0	0	0	0	0	0	0	0	0	0	0	0	0	0	0	0	0	0	0	0	0	0.022835	0	0	0
N-C18:0-Cer	0	0	0	0	0	0	0	0	0	0	0	0	0	0	0	0	0	0	0	0	0	0	0	0	0	0	0	0	0	0	0	0	0	0	0	0	2.65444	5.57383	0	4.53878	5.55884	3.07467	2.67613	5.49629	0	0.55346	0.222826	0
N-C18:0-Cer(2H)	0	0	0	0.000469839	0	0	0	0	0	0	0	0	0	0	0	0	0	0	0	0	0	0	0	0	0	0.00197604	0	0.00831217	0	0	0.00825484	0	0	0	0	0	0.134789	0.0328666	0.0546051	0.0424368	0.020975	0.0714421	0.0324683	0.0185695	0.136757	0.0300194	0.024373	0.0580444
N-C18:1-Cer	0	0	0	0	0	0	0	0	0	0	0	0	0	0	0	0	0	0	0	0	0	0	0	0	0	0	0	0	0	0	0	0	0	0	0	0	0	0	0	0.0136366	0.0716396	0.079698	0.114646	0.0599707	0.303521	0.323939	0.366493	0.355572
N-C18:1-Cer(2H)	0	0	0	0	0	0	0	0	0	0	0	0	0	0	0	0	0	0	0	0	0	0	0	0	0	0	0	0	0	0	0	0	0	0	0	0	0	0	0	0	0	0	0	0	0	0	0	0
N-C19:0(OH)-Cer	0	0	0	0	0	0	0	0	0	0	0	0	0	0	0	0	0	0	0	0	0	0	0	0	0	0	0	0	0	0	0	0	0	0	0	0	0.0380616	0	0.00811974	0	0	0	0	0	0.0346966	0	0	0
N-C19:0(OH)-Cer(2H)	0	0	0	0	0	0	0	0	0	0	0	0	0	0	0	0	0	0	0	0	0	0	0	0	0	0	0	0	0	0	0	0	0	0	0	0	0	0	0	0	0	0	0	0	0	0	0	0
N-C19:0-Cer	0.0539659	0.0507832	0.0228651	0.058263	0.0571343	0.0353511	0.0683566	0.0752655	0.0117916	0.00403378	0.0681941	0	0	0	0	0	0	0	0	0	0	0	0	0	0	0	0	0	0	0	0	0	0	0	0	0	0.0606143	0.094743	0.0181588	0.0824801	0.296036	0.210872	0.21795	0.275784	0.107005	0.155379	0.168903	0.141019
N-C19:0-Cer(2H)	0	0	0	0	0	0	0	0	0	0	0	0	0	0	0	0	0	0	0	0	0	0	0	0	0	0	0	0	0	0	0	0	0	0	0	0	0	0	0	0	0	0	0	0	0	0	0	0
N-C19:1-Cer	0	0	0	0	0	0	0	0	0	0	0	0	0	0	0	0	0	0	0	0	0	0	0	0	0	0	0	0	0	0	0	0	0	0	0	0	0	0	0	0	0	0	0	0	0	0	0	0
N-C19:1-Cer(2H)	0	0	0	0	0	0	0	0	0	0	0	0	0	0	0	0	0	0	0	0	0	0	0	0	0	0	0	0	0	0	0	0	0	0	0	0	0	0	0	0	0	0	0	0	0	0	0	0
N-C20:0(OH)-Cer	0	0	0	0	0	0	0	0.00696067	0	0	0	0.082723	0.0125942	0.0214619	0	0	0	0	0	0	0	0.0179679	0.0341351	0	0.0865235	0.00659163	0	0.0157648	0	0	0	0	0	0	0	0	0	0	0	0	0	0	0	0	0	0	0	0
N-C20:0(OH)-Cer(2H)	0	0	0	0	0	0	0	0	0	0	0	0.00812888	0	0	0	0	0	0	0	0	0	0	0	0	0	0	0	0	0	0	0	0	0	0	0	0	0	0	0	0	0	0	0	0	0	0	0	0
N-C20:0-Cer	0.399603	0.349431	0.312315	0.364477	0.367594	0.35632	0.512839	0.411487	0.159064	0.193285	0.423963	0.0683693	0.0735434	0.0562484	0.0737158	0.0652839	0.0681569	0.0586058	0.0860074	0.0950436	0.0673397	0.0598324	0.0632922	0.0804547	0.180124	0.202721	0.14648	0.245419	0.159084	0.164269	0.258934	0.243796	0.12447	0.140871	0.141178	0.161036	0.0485679	0.0345577	0.021603	0.0398515	0.0563002	0.0506347	0.0448446	0.0474174	0.0355685	0.0263536	0.0226694	0.0299889
N-C20:0-Cer(2H)	0	0	0	0	0	0	0	0	0	0	0	0	0	0	0	0	0	0	0	0	0	0	0	0	0	0	0	0	0	0	0	0	0	0	0	0	0	0	0	0	0	0	0	0	0	0	0	0
N-C20:1-Cer	0	0.00378895	0	0	0	0	0	0	0	0	0	0	0	0	0	0	0	0	0	0	0	0	0	0	0	0.0024051	0	0.00432474	0	0	0	0.00187123	0	0.000521167	0	0.00290776	0	0	0	0	0	0	0	0	0	0	0	0
N-C20:1-Cer(2H)	0	0	0	0	0	0	0	0	0	0	0	0	0	0	0	0	0	0	0	0	0	0	0	0	0	0	0	0	0	0	0	0	0	0	0	0	0	0	0	0	0	0	0	0	0	0	0	0
N-C21:0(OH)-Cer	0	0	0	0	0	0	0	0	0	0	0	0	0	0	0	0	0	0	0	0	0	0	0	0	0	0	0	0	0	0	0	0	0	0	0	0	0	0	0	0	0	0	0	0	0	0	0	0
N-C21:0(OH)-Cer(2H)	0	0	0	0	0	0	0	0	0	0	0	0	0	0	0	0	0	0	0	0	0	0	0	0	0	0	0	0	0	0	0	0	0	0	0	0	0	0	0	0	0	0	0	0	0	0	0	0
N-C21:0-Cer	0.0688926	0.0532726	0.0387696	0.0673307	0.0512169	0.0478639	0.0877151	0.0662614	0.0148591	0.0164219	0.0446848	0.0023687	0	0	0	0	0.00482864	0.00672942	0.00958046	0.0148931	0.0045783	0.0102762	0.0123231	0.0106644	0.0114038	0.0114769	0.00618224	0.0154825	0.033618	0.0309857	0.0319819	0.0328842	0.0268688	0.0319085	0.0312968	0.0406235	0	0.000705834	0	0	0	0	0	0	0	0	0	0
N-C21:0-Cer(2H)	0	0	0	0	0	0	0	0	0	0	0	0	0	0	0	0	0	0	0	0	0	0	0	0	0	0	0	0	0	0	0	0	0	0	0	0	0	0	0	0	0	0	0	0	0	0	0	0
N-C21:1-Cer	0	0	0	0	0	0	0	0	0	0	0	0	0	0	0	0	0	0	0	0	0	0	0	0	0	0	0	0	0	0	0	0	0	0	0	0	0	0	0	0	0	0	0	0	0	0	0	0
N-C21:1-Cer(2H)	0	0	0	0	0	0	0	0	0	0	0	0	0	0	0	0	0	0	0	0	0	0	0	0	0	0	0	0	0	0	0	0	0	0	0	0	0	0	0	0	0	0	0	0	0	0	0	0
N-C22:0(OH)-Cer	0	0	0	0	0	0	0	0	0	0	0	0	0	0	0	0	0	0	0	0	0	0	0	0	0	0	0	0	0	0	0	0	0	0	0	0	0	0	0	0	0	0	0	0	0	0	0	0
N-C22:0(OH)-Cer(2H)	0	0	0	0	0	0	0	0	0	0	0	0	0	0	0	0	0	0	0	0	0	0	0	0	0	0	0	0	0	0	0	0	0	0	0	0	0	0	0	0	0	0	0	0	0	0	0	0
N-C22:0-Cer	0.288177	0.265826	0.173841	0.264959	0.201129	0.233203	0.285788	0.259955	0.107365	0.107236	0.237951	0.0457029	0.256175	0.207982	0.281672	0.266066	0.266005	0.289321	0.357292	0.320866	0.234081	0.252308	0.213129	0.259904	1.08986	1.26398	1.22171	1.34073	1.42067	1.67366	1.9637	1.59539	0.979888	0.951644	0.884677	1.19578	0.0696456	0.0980414	0.0631897	0.0979804	0.0657872	0.0896183	0.0710489	0.0716682	0.0478586	0.0403702	0.0359401	0.0412845
N-C22:0-Cer(2H)	0	0	0	0	0	0	0	0	0	0	0	0	0	5.7252e-05	0.00317886	0.013759	0	0.0065147	0	4.6298e-05	0	0	0	0.00274413	0.0408402	0.0461721	0.0132437	0.0345238	0.0192862	0.045515	0.00409583	0.0303379	0.0467089	0.0202284	0.015832	0.0326737	0.000838859	0.000597758	0	0	0	0	0	0	0	0	0	0
N-C22:1-Cer	0.00511361	0.00165895	0.00792778	0.00660412	0.0195087	0.0148663	0.0141463	0.00850915	0.00216855	0.00815554	0.0226883	0	0.0138033	0.00785731	0.0110817	0.0102378	0.0125372	0.0107703	0.0267763	0.0208993	0.00728667	0.0213566	0.0152107	0.0130933	0.228579	0.3201	0.272917	0.286186	0.381527	0.471491	0.403485	0.463507	0.349957	0.456637	0.535977	0.590673	0.000386814	0.00355527	0.00233146	0.00453429	0.0038042	0.00676964	0.00356476	0.000402169	0.00031499	0.00163552	0	0.00922904
N-C22:1-Cer(2H)	0.0211424	0.0205925	0.0203868	0.0241876	0.0202003	0.0195949	0.0250408	0.0240384	0.0203853	0.0207334	0.0222729	0.0208985	0.0233385	0.0208151	0.0233284	0.0213495	0.0227145	0.0204733	0.0255694	0.021008	0.0211563	0.0226246	0.0239703	0.0235572	0.0308229	0.0341051	0.0377869	0.0374217	0.0296081	0.0290706	0.0311915	0.0405211	0.0419803	0.0286976	0.032959	0.0468468	0.0234381	0.0213426	0.0212699	0.0215615	0.020591	0.0204873	0.0219487	0.0199405	0.0213472	0.0211778	0	0.0204847
N-C23:0(OH)-Cer	0	0	0	0	0	0	0	0	0	0	0	0	0	0	0	0	0	0	0	0	0	0	0	0	0	0	0	0	0	0	0	0	0	0	0	0	0	0	0	0	0	0	0	0	0	0	0	0
N-C23:0(OH)-Cer(2H)	0	0	0	0	0	0	0	0	0	0	0	0	0	0	0	0	0	0	0	0	0	0	0	0	0	0	0	0	0	0	0	0	0	0	0	0	0	0	0	0	0	0	0	0	0	0	0	0
N-C23:0-Cer	0.204665	0.236432	0.11454	0.214417	0.131366	0.122556	0.230331	0.158364	0.0447728	0.0690034	0.105364	0.00104798	0.141507	0.118994	0.237995	0.172596	0.232829	0.282093	0.312731	0.314584	0.165327	0.203315	0.172139	0.20568	0.67607	0.794553	0.746646	0.965998	0.782993	0.778388	0.962426	1.09208	0.771434	0.544716	0.653271	0.800284	0.147042	0.214391	0.121641	0.204822	0.154648	0.115244	0.0998735	0.0987503	0.0358304	0.106703	0.0628551	0.0555377
N-C23:0-Cer(2H)	0	0	0	0	0	0	0	0	0	0	0	0	0	0	0	0	0	0	0	0	0	0	0	0	0.00351079	0.00606664	0	0.00464732	0.00107364	0	0.00139854	0	0.00348916	0.00201052	0.00297084	0	0	0	0	0	0	0	0	0	0	0	0	0
N-C23:1-Cer	0.178173	0.178414	0.181341	0.178224	0.179073	0.175066	0.176176	0.186632	0.173356	0.172965	0.181741	0.169284	0.175844	0.183917	0.181934	0.177829	0.174777	0.187251	0.191359	0.17611	0.179853	0.180583	0.178229	0.179053	0.232612	0.251838	0.231077	0.251594	0.235868	0.258953	0.241904	0.270259	0.256444	0.231102	0.277653	0.29547	0.176421	0.178045	0.175001	0.184133	0.176527	0.177479	0.167906	0.17586	0.169116	0.171049	0.169801	0.1668
N-C23:1-Cer(2H)	0.0207215	0	0.0200125	0.0201227	0.020093	0	0.0201016	0	0.0200305	0.0211111	0.0200707	0	0	0	0.0207965	0	0	0.0207528	0.0207945	0.0216742	0	0	0	0.0201562	0.0231111	0.022652	0.0230312	0.0279692	0.0212391	0.0222256	0.025795	0.0230576	0.0230121	0.0250245	0.0221559	0.0274205	0.0201128	0.0222589	0.0214757	0.0211212	0.0201176	0	0	0.0214091	0	0.0207682	0.0201252	0
N-C24:0(OH)-Cer	0	0	0	0	0	0	0	0	0	0	0	0	0	0	0	0	0	0	0	0	0	0	0	0	0	0	0	0	0	0	0	0	0	0	0	0	0	0	0	0	0	0	0	0	0	0	0	0
N-C24:0(OH)-Cer(2H)	0	0	0	0	0	0	0	0	0	0	0	0	0	0	0	0	0	0	0	0	0	0	0	0	0	0	0	0	0	0	0	0	0	0	0	0	0	0	0	0	0	0	0	0	0	0	0	0
N-C24:0-Cer	0	0	0	0	0	0	0	0	0	0	0	0	1.151	1.03053	1.27829	1.23618	1.29064	1.43688	1.22067	1.31775	1.13296	0.99651	0.983318	1.10583	1.85165	2.11424	2.30651	2.11822	1.94375	2.27202	2.55262	2.36859	2.25204	1.48027	1.37031	1.73385	0	0	0	0	0	0	0	0	0	0	0	0
N-C24:0-Cer(2H)	0	0	0	0	0	0	0	0	0	0	0	0	0	0	0.0383092	0	0	0	0	0.0308992	0	0	0	0	0.0348226	0.0446642	0	0.0475069	0	0	0	0.0409971	0.0502726	0	0.0327226	0.038339	0	0	0	0	0	0	0	0	0	0	0	0
N-C24:1-Cer	0.519189	0.457296	0.40127	0.480288	0.277097	0.354414	0.456176	0.419411	0.298441	0.326022	0.402735	0.0383841	1.68583	1.4273	1.91869	1.88702	1.62451	2.39928	2.12178	2.2262	1.46066	2.2542	1.61049	2.13138	6.99734	8.72064	7.55295	9.46018	4.8578	6.98106	5.97981	8.02686	7.31819	5.48526	6.49182	7.1712	1.1602	1.44947	1.002	1.45818	0.77812	0.813862	0.640999	0.792797	0.607682	0.645263	0.509057	0.622975
N-C24:1-Cer(2H)	0	0	0	0	0	0	0	0	0	0	0	0	0	0	0	0	0	0	0	0	0	0	0	0	0.0973491	0.0907052	0.0923512	0.112016	0.0650819	0.0640285	0.0800836	0	0.0949013	0.0609735	0	0.0829107	0	0	0	0	0	0	0	0	0	0	0	0
N-C25:0(OH)-Cer	0	0	0	0	0	0	0	0	0	0	0	0	0	0	0	0	0	0	0	0	0	0	0	0	0	0	0	0	0	0	0	0	0	0	0	0	0	0	0	0	0	0	0	0	0	0	0	0
N-C25:0(OH)-Cer(2H)	0	0	0	0	0	0	0	0	0	0	0	0	0	0	0	0	0	0	0	0	0	0	0	0	0	0	0	0	0	0	0	0	0	0	0	0	0	0	0	0	0	0	0	0	0	0	0	0
N-C25:0-Cer	0	0	0	0	0	0	0	0	0	0	0	0	0	0	0	0	0	0	0	0	0	0	0	0	0	0	0	0	0	0	0	0	0	0	0	0	0	0	0	0	0	0	0	0	0	0	0	0
N-C25:0-Cer(2H)	0	0	0	0	0	0	0	0	0	0	0	0	0.0210592	0.0220842	0.0281818	0.0270663	0.0168024	0.0190829	0.0209066	0.0405705	0.0117902	0.0134541	0.0136798	0.00140414	0	0.00299308	0	0.0137971	0	0.00154186	0.00965311	0	0.00668332	0.00535721	0.0105233	0.0288953	0	0	0	0	0	0	0	0	0	0	0	0
N-C25:1-Cer	0	0	0	0	0	0	0	0	0	0	0	0	0	0	0	0	0	0	0.00395612	0	0	0	0	0	0.0193354	0.0415597	0.0237532	0.0479872	0.00119214	0.00300466	0.0064864	0.0335206	0.01773	0	0.000885706	0.0202969	0	0	0	0	0	0	0	0	0	0	0	0
N-C25:1-Cer(2H)	0	0	0	0	0	0	0	0	0	0	0	0	0	0	0	0	0	0	0	0	0	0	0	0	0	0	0	0	0	0	0	0	0	0	0	0	0	0	0	0	0	0	0	0	0	0	0	0
N-C26:0(OH)-Cer	0	0	0	0	0	0	0	0	0	0	0	0	0	0	0	0	0	0	0	0	0	0	0	0	0	0	0	0	0	0	0	0	0	0	0	0	0	0	0	0	0	0	0	0	0	0	0	0
N-C26:0(OH)-Cer(2H)	0	0	0	0	0	0	0	0	0	0	0	0	0	0	0	0	0	0	0	0	0	0	0	0	0	0	0	0	0	0	0	0	0	0	0	0	0	0	0	0	0	0	0	0	0	0	0	0
N-C26:0-Cer	0	0	0	0	0	0	0	0	0	0	0	0	0	0	0	0	0	0	0	0	0	0	0	0	0	0	0	0	0	0	0	0	0	0	0	0	0	0	0	0	0	0	0	0	0	0	0	0
N-C26:0-Cer(2H)	0	0	0	0	0	0	0	0	0	0	0	0	0	0	0	0	0	0	0	0	0	0	0	0	0	0	0	0	0	0	0	0	0	0	0	0	0	0	0	0	0	0	0	0	0	0	0	0
N-C26:1-Cer	0	0	0	0	0	0	0	0	0	0	0	0	0	0	0	0	0	0	0	0	0	0	0	0	0	0	0	0	0	0	0	0	0	0	0	0	0	0	0	0	0	0	0	0	0	0	0	0
N-C26:1-Cer(2H)	0	0.0209046	0	0	0	0.0202298	0	0	0	0	0	0	0	0.0203702	0	0	0.0202782	0	0	0	0	0.0210956	0	0.0202027	0	0	0	0	0	0	0	0.0203305	0.0202211	0	0.0218706	0.0202742	0.0209177	0.0202741	0	0	0.0202305	0	0	0	0	0	0	0
N-C27:0(OH)-Cer	0	0	0	0	0	0	0	0	0	0	0	0	0	0	0	0	0	0	0	0	0	0	0	0	0	0	0	0	0	0	0	0	0	0	0	0	0	0	0	0	0	0	0	0	0	0	0	0
N-C27:0(OH)-Cer(2H)	0	0	0	0	0	0	0	0	0	0	0	0	0	0	0	0	0	0	0	0	0	0	0	0	0	0	0	0	0	0	0	0	0	0	0	0	0	0	0	0	0	0	0	0	0	0	0	0
N-C27:0-Cer	0	0	0	0	0	0	0	0	0	0	0	0	0	0	0	0	0	0	0	0	0	0	0	0	0	0	0	0	0	0	0	0	0	0	0	0	0	0	0	0	0	0	0	0	0	0	0	0
N-C27:0-Cer(2H)	0	0	0	0	0	0	0	0	0	0	0	0	0	0	0	0	0	0	0	0	0	0	0	0	0	0	0	0	0	0	0	0	0	0	0	0	0	0	0	0	0	0	0	0	0	0	0	0
N-C27:1-Cer	0	0	0	0	0	0	0	0	0	0	0	0	0	0	0	0	0	0	0	0	0	0	0	0	0	0	0	0	0	0	0	0	0	0	0	0	0	0	0	0	0	0	0	0	0	0	0	0
N-C27:1-Cer(2H)	0.0221502	0	0	0	0	0	0.0202113	0.0202547	0	0	0	0	0	0.0203527	0	0	0	0.0201709	0.0202707	0	0.0201747	0.0202728	0	0	0.0203925	0	0	0	0.0203947	0	0	0	0	0	0	0	0	0	0	0	0.0202164	0	0	0	0	0.0201769	0	0
N-C28:0(OH)-Cer	0	0	0	0	0	0	0	0	0	0	0	0	0	0	0	0	0	0	0	0	0	0	0	0	0	0	0	0	0	0	0	0	0	0	0	0	0	0	0	0	0	0	0	0	0	0	0	0
N-C28:0(OH)-Cer(2H)	0	0	0	0	0	0	0	0	0	0	0	0	0	0	0	0	0	0	0	0	0	0	0	0	0	0	0	0	0	0	0	0	0	0	0	0	0	0	0	0	0	0	0	0	0	0	0	0
N-C28:0-Cer	0	0	0	0	0	0	0	0	0	0	0	0	0	0	0	0	0	0	0	0	0	0	0	0	0	0	0	0	0	0	0	0	0	0	0	0	0	0	0	0	0	0	0	0	0	0	0	0
N-C28:0-Cer(2H)	0	0	0	0	0	0	0	0	0	0	0	0	0	0	0	0	0	0	0	0	0	0	0	0	0	0	0	0	0	0	0	0	0	0	0	0	0	0	0	0	0	0	0	0	0	0	0	0
N-C28:1-Cer	0	0	0	0	0	0	0	0	0	0	0	0	0	0	0	0	0	0	0	0	0	0	0	0	0	0	0	0	0	0	0	0	0	0	0	0	0	0	0	0	0	0	0	0	0	0	0	0
N-C28:1-Cer(2H)	0	0	0	0.0202688	0	0.0202436	0	0.0202117	0	0.0206273	0	0	0	0	0	0	0	0	0	0	0	0	0	0	0	0	0	0	0	0	0	0.0219199	0	0.0202919	0	0	0.0201408	0.020202	0	0.0200119	0.0202305	0	0.0208513	0	0	0.0201509	0.020176	0.0201592
N-C7:0(OH)-Cer	0	0	0	0	0	0	0	0	0	0	0	0	0	0	0	0	0	0	0	0	0	0.00259938	0	0	0	0	0	0	0	0	0	0	0	0	0	0	0	0	0	0	0	0	0	0	0	0	0	0
N-C7:0(OH)-Cer(2H)	0	0	0	0	0	0	0	0	0	0	0	0	0	0	0	0	0	0	0	0	0	0	0	0	0	0	0	0	0	0	0	0	0	0	0	0	0	0	0	0	0	0	0	0	0	0	0	0
N-C7:0-Cer	0.00072157	0.00103125	0.00130099	0.0013907	0.00105838	0.00134755	0.000880981	0.000739546	0.00146223	0.000796164	0.000744789	0.00219286	0.00407105	0.00217381	0.00140052	0.00251521	0.00211343	0.00190361	0.00269319	0.00194822	0.0011966	0.00270411	0.00123517	0.000937454	0.00317149	0.00171493	0.00176365	0.0014882	0.00230968	0.00211968	0.0022145	0.00148806	0.00263582	0.00112525	0.00201175	0.00138693	0.000889134	0.00138882	0.00149464	0.000962736	0.00137058	0.00104136	0.000887914	0	0.000575618	0.00100239	0.00112857	0.000739465
N-C7:0-Cer(2H)	0	0	0	0	0	0	0	0	0	0	0	0	0	0.000265106	0	0.000441512	0	0	0	0	0	0	0	0	0	0	0	0	0.000170318	0	0	0	0.00122666	0	0	0	0	0	0	0	0	0.000200904	0	0	0	0	0	0
N-C7:1-Cer	0	0	0.000863436	0.00222458	0.000581636	0.000886808	0.000729752	0.000904052	0.000682805	0	0	0.000906246	0.0009204	0.00120357	0	0.00147303	0.000930873	0.000917405	0.00112278	0.000761998	0	0.000597924	0.00124184	0.00111671	0.000618776	0.001351	0.000806428	0	0.000800383	0.000932752	0.000601657	0.000778511	0.000592668	0.000775204	0.000599056	0	0.000892963	0.00090753	0.00103792	0	0.000580553	0.000577372	0.00057792	0	0.000734018	0.000713525	0.00113437	0.00123169
N-C7:1-Cer(2H)	0	0	0	0	0	0	0	0	0	0	0	0	0	0	0	0	7.6828e-06	0	0	0	0.000638263	0	0	0	0	0	0	0	0	0	0	0	0	0	0	0	0	0	0	0	0	0	0	0	0	0	0	0
N-C8:0(OH)-Cer	0	0	0	0	0	0	0	0	0	0	0	0	0	0	0	0	0	0	0	0	0	0	0	0	0	0	0	0	0	0	0	0	0	0	0	0	0	0	0	0	0	0	0	0	0	0	0	0
N-C8:0(OH)-Cer(2H)	0	0	0	0	0	0	0	0	0	0	0	0	0	0	0	0	0	0	0	0	0	0	0	0	0	0	0	0	0	0	0	0	0	0	0	0	0	0	0	0	0	0	0	0	0	0	0	0
N-C8:0-Cer	0.000568136	0.00087901	0.00100924	0.000748594	0	0.00073066	0.000725854	0	0.000549245	0.000545862	0.000579452	0.000738112	0.00108644	0.00100495	0.00107444	0	0.000929441	0	0.000771055	0.000930418	0.000575844	0.00059644	0.000583429	0.000594427	0.00140472	0.00134943	0.00118894	0.000848656	0.000986234	0.000762598	0.00149849	0.00113473	0.00127274	0.00130309	0	0.0013853	0.00073342	0.00057857	0.000728805	0.000826483	0.000894404	0.00134886	0.00073092	0	0.000732701	0.000712294	0.000563501	0.000744681
N-C8:0-Cer(2H)	0	0	0	0	0	0	0	0	0	0	0	0	0	0	0	0	0	0	0	0	0	0	0	0	0.00032782	0	0	0	0	0	0	0	0	0	0	0	0	0	0	0	0	0	0	0.000155625	0	0	0	0
N-C8:1-Cer	0.00087121	0	0.000569338	0.000586134	0.000740982	0.000577129	0.000883482	0.000904052	0.000813063	0.000546914	0.000906039	0.00122888	0	0.000812928	0	0.000772535	0.000591818	0.000587328	0.000597412	0.000592144	0.000577152	0.000597924	0.000750108	0.000595894	0	0.000608032	0.000614359	0	0.000800383	0	0	0	0.000592668	0.000598747	0.00165965	0.000615217	0.000736072	0.00106928	0.000576198	0.000557401	0.000738816	0.000887538	0.00073355	0	0.000578154	0.000567907	0.000564705	0.000584169
N-C8:1-Cer(2H)	0	0	0	0	0	0	0	0	0	0	0	0	0	0	0	0	0	0	0	0	0	0	0	0	0	0	0	0	0	0	0	0	0	0	0	0	0	0	0	0	0	0	0.000238081	0	0	0	0	0
N-C9:0(OH)-Cer	0	0	0	0	0	0	0	0	0	0	0	0	0	0	0	0	0	0	0	0	0	0	0	0	0	0	0	0	0	0	0	0	0	0	0	0	0	0	0	0	0	0	0	0	0	0	0	0
N-C9:0(OH)-Cer(2H)	0	0	0	0	0	0	0	0	0	0	0	0	0	0	0	0	0	0	0	0	0	0	0	0	0	0	0	0	0	0	0	0	0	0	0	0	0	0	0	0	0	0	0	0	0	0	0	0
N-C9:0-Cer	0	0	0	0	0	0	0	0	0	0	0	0	0	0	0	0	0	0	0	0	0	0	0	0	0	0	0	0	0	0	0	0	0	0	0	0	0	0	0	0	0	0	0	0	0	0	0	0
N-C9:0-Cer(2H)	0	0	0	0	0	0	0	0	0	0	0	0	0	0	0	0	0	0	6.02624e-05	0	0	0	0	0	0	0	0	0	0	0	0.00012779	0	0	0	0	0	0	0	0	0	0	0	0	0	0	0	0	0
N-C9:1-Cer	0	0	0	0	0	0	0	0	0	0	0	0	0	0	0	0	0	0	0	0	0	0	0	0	0	0	0	0	0	0	0	0	0	0	0	0	0	0	0	0	0	0	0	0	0	0	0	0
N-C9:1-Cer(2H)	0	0	0	0	0	0	0	0	0	0	0	0	0	0	0	0	0	0	0	0	0	0	0	0	0	0.000183681	0	0	0	0	0	0	0	0	0	0	0	0	0	0	0	0	0	0	0	0	0	0
