# Supplementary material for: Altered lipid metabolism in the aging kidney identified by three layered omic analysis
Source: Aging (Albany NY). 2016 Feb 16;8(3):441–54. doi: 10.18632/aging.100900 (PMC4833139; doi:10.18632/aging.100900)
Supplement: Supplementary file 4 [file aging-08-441-s004.xlsx]

## Sheet: Kidney
Data set 3 - Correlation of differentially detectedlipids to enzyme pathways
Organ	Lipid	potential Lipids	HMDB ID	KEGG reaction	UniProt IDs	KEGG enzyme	KO	GN
kidney	N-C18:0-Cer	Ceramide (d18:1/18:0)	HMDB04950	R01493	Q8VD53	3.5.1.23		230379
					Q9JHE3	3.5.1.23		54447
					A2BDY7	3.5.1.23		230379
					Q78P93	3.5.1.23		11886
					Q8R4X1	3.5.1.23		171168
					Q9WV54	3.5.1.23		11886
					A1L3S2	3.5.1.23		171168
				R01494	Q8R4X1	3.5.1.23	K01441	171168
					A1L3S2	3.5.1.23	K01441	171168
					A2BDY7	3.5.1.23	K01441	230379
					Q8VD53	3.5.1.23	K01441	230379
					Q9WV54	3.5.1.23		11886
					Q9JHE3	3.5.1.23		54447
					Q78P93	3.5.1.23		11886
				R01495	Q52KP2	2.7.1.138	K04715	223753
				R01496	n/a
				R01497	O88693	2.4.1.80	K00720	22234
					A2AN90	2.4.1.80	K00720	22234
				R01498	P17439	3.2.1.45	K01201	14466
				R01500	Q64676	2.4.1.47	K04628	22239
				R01501	n/a
				R01503	n/a
				R01891	Q9D4B1	2.7.8.3	K04714	74442
					Q8VCQ6	2.7.8.3	K04714	208449
				R02541	Q9JJY3	3.1.4.12		58994
					Q6ZPR5	3.1.4.12		77626
					O70572	3.1.4.12		20598
					Q04519	3.1.4.12		20597
				R03617	Q3U3H7	3.2.1.46	K01202	14420
					P54818	3.2.1.46	K01202	14420
				R04118	n/a
				R04921	n/a
				R06157	n/a
				R06275	O88693	2.4.1.80		22234
					A2AN90	2.4.1.80		22234
				R06277	Q64676	2.4.1.47		22239
				R06283	n/a
				R06519	Q3TS87		K04712	619326
					O09005		K04712	13244
					Q8R2F2		K04712	70059
				R06522	Q6GT30	3.1.3.4	K01080	19012
					B1ASM1	3.1.3.4	K01080	67916
					Q99JY8	3.1.3.4	K01080	67916
					Q9DAX2	3.1.3.4	K01080	50784
				R08969	n/a
	PC aa C34:1	PC(P-16:0/18:1(9Z))	HMDB11210	R01309	P97823	3.1.1.5		18777
		PC(P-16:0/18:1(11Z))	HMDB11209		Q8VEB4	3.1.1.5		192654
		PC(20:1(11Z)/14:0)	HMDB08295		B1AV56	3.1.1.5		26394
		PC(18:1(9Z)/P-16:0)	HMDB08126		P47713	3.1.1.5		18783
		PC(18:0/16:1(9Z))	HMDB08035		Q3UMQ1	3.1.1.5		18783
		PC(16:0/18:1(11Z))	HMDB07971		Q9WTL7	3.1.1.5		26394
		PC(dm18:1(11Z)/dm16:0)	HMDB11298	R01310	Q5SXG5	3.1.4.4	K01115	18806
		PC(P-18:1(11Z)/16:0)	HMDB11272		Q6NVF2	3.1.4.4	K01115	18805
		PC(P-18:0/16:1(9Z))	HMDB11240		P97813	3.1.4.4	K01115	18806
		PC(dm16:0/dm18:1(9Z))	HMDB11235	R01312	n/a
		PC(dm16:0/dm18:1(11Z))	HMDB11234	R01313	Q6GTW1	3.1.1.4		18784
		PC(P-18:1(9Z)/16:0)	HMDB11305		Q8CE14	3.1.1.4		26971
		PC(18:1(11Z)/16:0)	HMDB08067		P31482	3.1.1.4		18780
		PC(16:1(9Z)/18:0)	HMDB08003		Q9WVF6	3.1.1.4		18782
		PC(16:0/P-18:1(9Z))	HMDB07997		Q3UG05	3.1.1.4		26970
		PC(14:1(9Z)/20:0)	HMDB07911		Q9Z0Y2	3.1.1.4		18778
		PC(dm18:1(9Z)/dm16:0)	HMDB11331		A2AQJ0	3.1.1.4		329502
		PC(18:1(11Z)/P-16:0)	HMDB08093		A6H6K5	3.1.1.4		18778
		PC(16:1(9Z)/P-18:0)	HMDB08028		Q8VC81	3.1.1.4		69836
		PC(14:0/20:1(11Z))	HMDB07879		P97819	3.1.1.4		53357
		PC(20:0/14:1(9Z))	HMDB08263		P48076	3.1.1.4		18781
		PC(18:1(9Z)/16:0)	HMDB08100		P47713	3.1.1.4		18783
		PC(16:0/P-18:1(11Z))	HMDB07996		Q3TYT9	3.1.1.4		18782
		PC(16:0/18:1(9Z))	HMDB07972		Q9QUL3	3.1.1.4		26970
	PC aa C34:2	PC(14:0/20:2(11Z,14Z))	HMDB07880		Q6AXH0	3.1.1.4		237625
		PC(P-18:1(9Z)/16:1(9Z))	HMDB11306		Q3UN31	3.1.1.4		53357
		PC(20:1(11Z)/14:1(9Z))	HMDB08296		Q9QXX3	3.1.1.4		26565
		PC(18:2(9Z,12Z)/16:0)	HMDB08133		Q9EPR2	3.1.1.4		66350
		PC(18:1(9Z)/16:1(9Z))	HMDB08101		Q8BZT7	3.1.1.4		237625
		PC(16:1(9Z)/18:1(9Z))	HMDB08005		Q50L42	3.1.1.4		329502
		PC(16:1(9Z)/18:1(11Z))	HMDB08004		Q3UMQ1	3.1.1.4		18783
		PC(18:2(9Z,12Z)/P-16:0)	HMDB08159	R01314	n/a
		PC(18:1(11Z)/16:1(9Z))	HMDB08068	R01315	Q9QXX3	3.1.1.4	K01047	26565
		PC(P-16:0/18:2(9Z,12Z))	HMDB11211		Q8BZT7	3.1.1.4	K01047	237625
		PC(16:1(9Z)/P-18:1(9Z))	HMDB08030		Q9Z0Y2	3.1.1.4	K01047	18778
		PC(P-18:1(11Z)/16:1(9Z))	HMDB11273		Q9WVF6	3.1.1.4	K01047	18782
		PC(20:2(11Z,14Z)/14:0)	HMDB08328		Q3UN31	3.1.1.4	K01047	53357
		PC(16:1(9Z)/P-18:1(11Z))	HMDB08029		Q3UG05	3.1.1.4	K01047	26970
		PC(16:0/18:2(9Z,12Z))	HMDB07973		P48076	3.1.1.4	K01047	18781
		PC(14:1(9Z)/20:1(11Z))	HMDB07912		Q3UMQ1	3.1.1.4	K01047	18783
	PC aa C38:6	PC(P-16:0/22:6(4Z,7Z,10Z,13Z,16Z,19Z))	HMDB11229		P47713	3.1.1.4	K01047	18783
		PC(16:1(9Z)/22:5(7Z,10Z,13Z,16Z,19Z))	HMDB08024		Q50L42	3.1.1.4	K01047	329502
		PC(22:6(4Z,7Z,10Z,13Z,16Z,19Z)/P-16:0)	HMDB08751		Q3TYT9	3.1.1.4	K01047	18782
		PC(22:6(4Z,7Z,10Z,13Z,16Z,19Z)/16:0)	HMDB08725		Q6GTW1	3.1.1.4	K01047	18784
		PC(20:5(5Z,8Z,11Z,14Z,17Z)/18:1(11Z))	HMDB08498		Q9QUL3	3.1.1.4	K01047	26970
		PC(20:4(8Z,11Z,14Z,17Z)/18:2(9Z,12Z))	HMDB08467		A6H6K5	3.1.1.4	K01047	18778
		PC(20:3(5Z,8Z,11Z)/18:3(9Z,12Z,15Z))	HMDB08371		Q9EPR2	3.1.1.4	K01047	66350
		PC(18:4(6Z,9Z,12Z,15Z)/20:2(11Z,14Z))	HMDB08243		P97819	3.1.1.4	K01047	53357
		PC(18:3(6Z,9Z,12Z)/20:3(8Z,11Z,14Z))	HMDB08179		Q8CE14	3.1.1.4	K01047	26971
		PC(18:1(11Z)/20:5(5Z,8Z,11Z,14Z,17Z))	HMDB08083		Q6AXH0	3.1.1.4	K01047	237625
		PC(22:5(4Z,7Z,10Z,13Z,16Z)/16:1(9Z))	HMDB08660		P31482	3.1.1.4	K01047	18780
		PC(20:4(5Z,8Z,11Z,14Z)/18:2(9Z,12Z))	HMDB08434		Q8VC81	3.1.1.4	K01047	69836
		PC(18:3(6Z,9Z,12Z)/20:3(5Z,8Z,11Z))	HMDB08178		A2AQJ0	3.1.1.4	K01047	329502
		PC(16:1(9Z)/22:5(4Z,7Z,10Z,13Z,16Z))	HMDB08022	R01316	n/a
		PC(P-18:1(9Z)/20:5(5Z,8Z,11Z,14Z,17Z))	HMDB11321	R01317	Q8CE14	3.1.1.4	K01047	26971
		PC(22:5(7Z,10Z,13Z,16Z,19Z)/16:1(9Z))	HMDB08693		P31482	3.1.1.4	K01047	18780
		PC(20:5(5Z,8Z,11Z,14Z,17Z)/P-18:1(11Z))	HMDB08523		Q6GTW1	3.1.1.4	K01047	18784
		PC(20:5(5Z,8Z,11Z,14Z,17Z)/18:1(9Z))	HMDB08499		Q8VC81	3.1.1.4	K01047	69836
		PC(20:3(8Z,11Z,14Z)/18:3(9Z,12Z,15Z))	HMDB08404		Q3UN31	3.1.1.4	K01047	53357
		PC(18:3(9Z,12Z,15Z)/20:3(8Z,11Z,14Z))	HMDB08212		Q9QXX3	3.1.1.4	K01047	26565
		PC(P-18:1(11Z)/20:5(5Z,8Z,11Z,14Z,17Z))	HMDB11288		Q3TYT9	3.1.1.4	K01047	18782
		PC(20:5(5Z,8Z,11Z,14Z,17Z)/P-18:1(9Z))	HMDB08524		Q3UG05	3.1.1.4	K01047	26970
		PC(20:3(8Z,11Z,14Z)/18:3(6Z,9Z,12Z))	HMDB08403		P97819	3.1.1.4	K01047	53357
		PC(20:3(5Z,8Z,11Z)/18:3(6Z,9Z,12Z))	HMDB08370		Q50L42	3.1.1.4	K01047	329502
		PC(20:2(11Z,14Z)/18:4(6Z,9Z,12Z,15Z))	HMDB08339		Q9WVF6	3.1.1.4	K01047	18782
		PC(18:3(9Z,12Z,15Z)/20:3(5Z,8Z,11Z))	HMDB08211		A2AQJ0	3.1.1.4	K01047	329502
		PC(18:2(9Z,12Z)/20:4(8Z,11Z,14Z,17Z))	HMDB08148		Q9Z0Y2	3.1.1.4	K01047	18778
		PC(18:2(9Z,12Z)/20:4(5Z,8Z,11Z,14Z))	HMDB08147		Q9QUL3	3.1.1.4	K01047	26970
		PC(18:1(9Z)/20:5(5Z,8Z,11Z,14Z,17Z))	HMDB08116		Q6AXH0	3.1.1.4	K01047	237625
		PC(16:0/22:6(4Z,7Z,10Z,13Z,16Z,19Z))	HMDB07991		P48076	3.1.1.4	K01047	18781
	PC ae C36:6	not annotated	not annotated		Q8BZT7	3.1.1.4	K01047	237625
					A6H6K5	3.1.1.4	K01047	18778
					P47713	3.1.1.4	K01047	18783
					Q3UMQ1	3.1.1.4	K01047	18783
					Q9EPR2	3.1.1.4	K01047	66350
				R01318	n/a
				R01319	n/a
				R01320	n/a
				R01321	n/a
				R02114	P16301	2.3.1.43	K00650	16816
					Q791M3	2.3.1.43	K00650	16816
				R04227	n/a
				R04514	Q9JI60	2.3.1.135		79235
					B2RUR5	2.3.1.135		79235
				R05794	n/a
				R07064	Q8VC81	3.1.1.4	K01047	69836
					Q9Z0Y2	3.1.1.4	K01047	18778
					P47713	3.1.1.4	K01047	18783
					Q6GTW1	3.1.1.4	K01047	18784
					Q9QXX3	3.1.1.4	K01047	26565
					Q9QUL3	3.1.1.4	K01047	26970
					A2AQJ0	3.1.1.4	K01047	329502
					Q3UN31	3.1.1.4	K01047	53357
					Q9WVF6	3.1.1.4	K01047	18782
					Q3UMQ1	3.1.1.4	K01047	18783
					Q9EPR2	3.1.1.4	K01047	66350
					Q3TYT9	3.1.1.4	K01047	18782
					Q8BZT7	3.1.1.4	K01047	237625
					Q50L42	3.1.1.4	K01047	329502
					P31482	3.1.1.4	K01047	18780
					Q8CE14	3.1.1.4	K01047	26971
					P97819	3.1.1.4	K01047	53357
					A6H6K5	3.1.1.4	K01047	18778
					Q6AXH0	3.1.1.4	K01047	237625
					Q3UG05	3.1.1.4	K01047	26970
					P48076	3.1.1.4	K01047	18781
				R07377	Q99LH2		K08729	19210
				R07859	Q8BZT7	3.1.1.4	K01047	237625
					Q6AXH0	3.1.1.4	K01047	237625
					P48076	3.1.1.4	K01047	18781
					Q3UMQ1	3.1.1.4	K01047	18783
					Q9QUL3	3.1.1.4	K01047	26970
					P97819	3.1.1.4	K01047	53357
					P47713	3.1.1.4	K01047	18783
					Q8CE14	3.1.1.4	K01047	26971
					A2AQJ0	3.1.1.4	K01047	329502
					Q9WVF6	3.1.1.4	K01047	18782
					A6H6K5	3.1.1.4	K01047	18778
					Q3TYT9	3.1.1.4	K01047	18782
					Q9Z0Y2	3.1.1.4	K01047	18778
					Q50L42	3.1.1.4	K01047	329502
					Q9EPR2	3.1.1.4	K01047	66350
					Q3UN31	3.1.1.4	K01047	53357
					Q8VC81	3.1.1.4	K01047	69836
					Q6GTW1	3.1.1.4	K01047	18784
					Q3UG05	3.1.1.4	K01047	26970
					P31482	3.1.1.4	K01047	18780
					Q9QXX3	3.1.1.4	K01047	26565
				R07860	n/a
				R08387	B2RUR5	2.3.1.135	K00678	79235
					Q9JI60	2.3.1.135	K00678	79235
				R08969	n/a
	PE aa C36:4	PE(18:4(6Z,9Z,12Z,15Z)/P-18:0)	HMDB09214	R02051	Q5SXG5	3.1.4.4	K01115	18806
		PE(20:3(5Z,8Z,11Z)/16:1(9Z))	HMDB09320		P97813	3.1.4.4	K01115	18806
		PE(18:2(9Z,12Z)/18:2(9Z,12Z))	HMDB09093		Q6NVF2	3.1.4.4	K01115	18805
		PE(18:0/18:4(6Z,9Z,12Z,15Z))	HMDB08997	R02052	n/a
		PE(16:0/20:4(5Z,8Z,11Z,14Z))	HMDB08937	R02053	P47713	3.1.1.4	K01047	18783
		PE(16:1(9Z)/20:3(5Z,8Z,11Z))	HMDB08968		Q9WVF6	3.1.1.4	K01047	18782
		PE(14:0/22:4(7Z,10Z,13Z,16Z))	HMDB08844		Q50L42	3.1.1.4	K01047	329502
		PE(P-16:0/20:4(5Z,8Z,11Z,14Z))	HMDB11352		Q3UN31	3.1.1.4	K01047	53357
		PE(20:4(5Z,8Z,11Z,14Z)/P-16:0)	HMDB09411		P97819	3.1.1.4	K01047	53357
		PE(18:4(6Z,9Z,12Z,15Z)/18:0)	HMDB09189		P48076	3.1.1.4	K01047	18781
		PE(P-18:0/18:4(6Z,9Z,12Z,15Z))	HMDB11379		Q3TYT9	3.1.1.4	K01047	18782
		PE(22:4(7Z,10Z,13Z,16Z)/14:0)	HMDB09580		Q9EPR2	3.1.1.4	K01047	66350
		PE(20:4(5Z,8Z,11Z,14Z)/16:0)	HMDB09385		Q8VC81	3.1.1.4	K01047	69836
		PE(P-18:1(9Z)/18:3(6Z,9Z,12Z))	HMDB11443		Q9Z0Y2	3.1.1.4	K01047	18778
		PE(18:3(6Z,9Z,12Z)/P-18:1(9Z))	HMDB09150		Q3UG05	3.1.1.4	K01047	26970
		PE(18:1(9Z)/18:3(9Z,12Z,15Z))	HMDB09062		Q6AXH0	3.1.1.4	K01047	237625
		PE(16:0/20:4(8Z,11Z,14Z,17Z))	HMDB08938		Q9QUL3	3.1.1.4	K01047	26970
		PE(P-18:1(11Z)/18:3(6Z,9Z,12Z))	HMDB11410		Q3UMQ1	3.1.1.4	K01047	18783
		PE(20:4(8Z,11Z,14Z,17Z)/P-16:0)	HMDB09444		Q6GTW1	3.1.1.4	K01047	18784
		PE(18:1(11Z)/18:3(6Z,9Z,12Z))	HMDB09028		A6H6K5	3.1.1.4	K01047	18778
		PE(20:4(8Z,11Z,14Z,17Z)/16:0)	HMDB09418		Q8BZT7	3.1.1.4	K01047	237625
		PE(18:3(9Z,12Z,15Z)/P-18:1(9Z))	HMDB09183		P31482	3.1.1.4	K01047	18780
		PE(P-18:1(11Z)/18:3(9Z,12Z,15Z))	HMDB11411		Q9QXX3	3.1.1.4	K01047	26565
		PE(P-16:0/20:4(8Z,11Z,14Z,17Z))	HMDB11353		A2AQJ0	3.1.1.4	K01047	329502
		PE(20:3(8Z,11Z,14Z)/16:1(9Z))	HMDB09353		Q8CE14	3.1.1.4	K01047	26971
		PE(18:3(9Z,12Z,15Z)/18:1(9Z))	HMDB09158	R02054	n/a
		PE(18:3(9Z,12Z,15Z)/18:1(11Z))	HMDB09157	R02055	Q505E1	4.1.1.65	K01613	320951
		PE(18:3(6Z,9Z,12Z)/18:1(9Z))	HMDB09125		Q8BSF4	4.1.1.65	K01613	320951
		PE(18:1(9Z)/18:3(6Z,9Z,12Z))	HMDB09061	R02056	Q8R0I1	2.1.1.17	K00551	18618
		PE(P-18:1(9Z)/18:3(9Z,12Z,15Z))	HMDB11444	R02057	n/a
		PE(18:3(9Z,12Z,15Z)/P-18:1(11Z))	HMDB09182	R04480	n/a
		PE(18:3(6Z,9Z,12Z)/P-18:1(11Z))	HMDB09149	R04864	n/a
		PE(18:3(6Z,9Z,12Z)/18:1(11Z))	HMDB09124	R05920	n/a
		PE(18:1(11Z)/18:3(9Z,12Z,15Z))	HMDB09029	R05923	Q9JJI6		K05288	56703
		PE(16:1(9Z)/20:3(8Z,11Z,14Z))	HMDB08969		O09101		K05287	18701
	PE aa C38:4	PE(22:4(7Z,10Z,13Z,16Z)/P-16:0)	HMDB09609	R05924	O09101		K05287	18701
		PE(22:4(7Z,10Z,13Z,16Z)/16:0)	HMDB09583	R07376	Q9Z1X2		K08730	27388
		PE(18:1(9Z)/20:3(5Z,8Z,11Z))	HMDB09067	R08107	O09101		K05287	18701
		PE(P-18:1(9Z)/20:3(5Z,8Z,11Z))	HMDB11449		Q9JJI6		K05288	56703
		PE(20:3(5Z,8Z,11Z)/18:1(11Z))	HMDB09322
		PE(P-18:1(11Z)/20:3(5Z,8Z,11Z))	HMDB11416
		PE(20:4(5Z,8Z,11Z,14Z)/P-18:0)	HMDB09412
		PE(20:4(5Z,8Z,11Z,14Z)/18:0)	HMDB09387
		PE(20:3(5Z,8Z,11Z)/P-18:1(11Z))	HMDB09347
		PE(20:3(5Z,8Z,11Z)/18:1(9Z))	HMDB09323
		PE(20:0/18:4(6Z,9Z,12Z,15Z))	HMDB09228
		PE(18:4(6Z,9Z,12Z,15Z)/20:0)	HMDB09196
		PE(18:2(9Z,12Z)/20:2(11Z,14Z))	HMDB09099
		PE(P-16:0/22:4(7Z,10Z,13Z,16Z))	HMDB11358
		PE(20:3(5Z,8Z,11Z)/P-18:1(9Z))	HMDB09348
		PE(18:0/20:4(5Z,8Z,11Z,14Z))	HMDB09003
		PE(16:0/22:4(7Z,10Z,13Z,16Z))	HMDB08943
		PE(20:2(11Z,14Z)/18:2(9Z,12Z))	HMDB09291
		PE(18:1(11Z)/20:3(5Z,8Z,11Z))	HMDB09034
		PE(P-18:0/20:4(8Z,11Z,14Z,17Z))	HMDB11386
		PE(20:1(11Z)/18:3(6Z,9Z,12Z))	HMDB09259
		PE(18:3(9Z,12Z,15Z)/20:1(11Z))	HMDB09164
		PE(18:1(9Z)/20:3(8Z,11Z,14Z))	HMDB09068
		PE(P-18:1(9Z)/20:3(8Z,11Z,14Z))	HMDB11450
		PE(20:3(8Z,11Z,14Z)/P-18:1(11Z))	HMDB09380
		PE(20:3(8Z,11Z,14Z)/18:1(9Z))	HMDB09356
		PE(20:1(11Z)/18:3(9Z,12Z,15Z))	HMDB09260
		PE(18:0/20:4(8Z,11Z,14Z,17Z))	HMDB09004
		PE(P-18:1(11Z)/20:3(8Z,11Z,14Z))	HMDB11417
		PE(20:4(8Z,11Z,14Z,17Z)/P-18:0)	HMDB09445
		PE(20:4(8Z,11Z,14Z,17Z)/18:0)	HMDB09420
		PE(20:3(8Z,11Z,14Z)/P-18:1(9Z))	HMDB09381
		PE(20:3(8Z,11Z,14Z)/18:1(11Z))	HMDB09355
		PE(18:3(6Z,9Z,12Z)/20:1(11Z))	HMDB09131
		PE(18:1(11Z)/20:3(8Z,11Z,14Z))	HMDB09035
		PE(O-18:1(1Z)/20:4(5Z,8Z,11Z,14Z))	HMDB05779
	PE aa C38:5	PE(20:5(5Z,8Z,11Z,14Z,17Z)/P-18:0)	HMDB09478
		PE(20:1(11Z)/18:4(6Z,9Z,12Z,15Z))	HMDB09261
		PE(18:2(9Z,12Z)/20:3(5Z,8Z,11Z))	HMDB09100
		PE(18:1(9Z)/20:4(5Z,8Z,11Z,14Z))	HMDB09069
		PE(P-18:1(9Z)/20:4(5Z,8Z,11Z,14Z))	HMDB11451
		PE(22:5(7Z,10Z,13Z,16Z,19Z)/16:0)	HMDB09649
		PE(18:0/20:5(5Z,8Z,11Z,14Z,17Z))	HMDB09005
		PE(22:5(7Z,10Z,13Z,16Z,19Z)/P-16:0)	HMDB09675
		PE(20:5(5Z,8Z,11Z,14Z,17Z)/18:0)	HMDB09453
		PE(20:4(5Z,8Z,11Z,14Z)/P-18:1(9Z))	HMDB09414
		PE(20:4(5Z,8Z,11Z,14Z)/18:1(9Z))	HMDB09389
		PE(20:4(5Z,8Z,11Z,14Z)/18:1(11Z))	HMDB09388
		PE(P-18:1(11Z)/20:4(5Z,8Z,11Z,14Z))	HMDB11418
		PE(P-16:0/22:5(7Z,10Z,13Z,16Z,19Z))	HMDB11360
		PE(20:4(5Z,8Z,11Z,14Z)/P-18:1(11Z))	HMDB09413
		PE(18:4(6Z,9Z,12Z,15Z)/20:1(11Z))	HMDB09197
		PE(16:0/22:5(7Z,10Z,13Z,16Z,19Z))	HMDB08945
		PE(P-18:0/20:5(5Z,8Z,11Z,14Z,17Z))	HMDB11387
		PE(22:4(7Z,10Z,13Z,16Z)/16:1(9Z))	HMDB09584
		PE(20:3(5Z,8Z,11Z)/18:2(9Z,12Z))	HMDB09324
		PE(18:1(11Z)/20:4(5Z,8Z,11Z,14Z))	HMDB09036
		PE(16:1(9Z)/22:4(7Z,10Z,13Z,16Z))	HMDB08976
		PE(22:5(4Z,7Z,10Z,13Z,16Z)/P-16:0)	HMDB09642
		PE(20:4(8Z,11Z,14Z,17Z)/P-18:1(11Z))	HMDB09446
		PE(20:3(8Z,11Z,14Z)/18:2(9Z,12Z))	HMDB09357
		PE(18:1(11Z)/20:4(8Z,11Z,14Z,17Z))	HMDB09037
		PE(P-18:1(9Z)/20:4(8Z,11Z,14Z,17Z))	HMDB11452
		PE(20:4(8Z,11Z,14Z,17Z)/P-18:1(9Z))	HMDB09447
		PE(20:4(8Z,11Z,14Z,17Z)/18:1(11Z))	HMDB09421
		PE(20:2(11Z,14Z)/18:3(9Z,12Z,15Z))	HMDB09293
		PE(16:0/22:5(4Z,7Z,10Z,13Z,16Z))	HMDB08944
		PE(P-18:1(11Z)/20:4(8Z,11Z,14Z,17Z))	HMDB11419
		PE(20:4(8Z,11Z,14Z,17Z)/18:1(9Z))	HMDB09422
		PE(18:3(9Z,12Z,15Z)/20:2(11Z,14Z))	HMDB09165
		PE(18:3(6Z,9Z,12Z)/20:2(11Z,14Z))	HMDB09132
		PE(22:5(4Z,7Z,10Z,13Z,16Z)/16:0)	HMDB09616
		PE(18:2(9Z,12Z)/20:3(8Z,11Z,14Z))	HMDB09101
		PE(P-16:0/22:5(4Z,7Z,10Z,13Z,16Z))	HMDB11359
		PE(20:2(11Z,14Z)/18:3(6Z,9Z,12Z))	HMDB09292
		PE(18:1(9Z)/20:4(8Z,11Z,14Z,17Z))	HMDB09070
	PE aa C38:6	PE(16:1(9Z)/22:5(7Z,10Z,13Z,16Z,19Z))	HMDB08978
		PE(22:6(4Z,7Z,10Z,13Z,16Z,19Z)/16:0)	HMDB09682
		PE(20:5(5Z,8Z,11Z,14Z,17Z)/P-18:1(9Z))	HMDB09480
		PE(P-18:1(9Z)/20:5(5Z,8Z,11Z,14Z,17Z))	HMDB11453
		PE(22:5(7Z,10Z,13Z,16Z,19Z)/16:1(9Z))	HMDB09650
		PE(20:5(5Z,8Z,11Z,14Z,17Z)/18:1(9Z))	HMDB09455
		PE(20:5(5Z,8Z,11Z,14Z,17Z)/18:1(11Z))	HMDB09454
		PE(20:4(5Z,8Z,11Z,14Z)/18:2(9Z,12Z))	HMDB09390
		PE(18:4(6Z,9Z,12Z,15Z)/20:2(11Z,14Z))	HMDB09198
		PE(18:1(11Z)/20:5(5Z,8Z,11Z,14Z,17Z))	HMDB09038
		PE(16:0/22:6(4Z,7Z,10Z,13Z,16Z,19Z))	HMDB08946
		PE(22:6(4Z,7Z,10Z,13Z,16Z,19Z)/P-16:0)	HMDB09708
		PE(20:5(5Z,8Z,11Z,14Z,17Z)/P-18:1(11Z))	HMDB09479
		PE(20:2(11Z,14Z)/18:4(6Z,9Z,12Z,15Z))	HMDB09294
		PE(18:2(9Z,12Z)/20:4(5Z,8Z,11Z,14Z))	HMDB09102
		PE(18:1(9Z)/20:5(5Z,8Z,11Z,14Z,17Z))	HMDB09071
		PE(22:5(4Z,7Z,10Z,13Z,16Z)/16:1(9Z))	HMDB09617
		PE(20:4(8Z,11Z,14Z,17Z)/18:2(9Z,12Z))	HMDB09423
		PE(20:3(8Z,11Z,14Z)/18:3(6Z,9Z,12Z))	HMDB09358
		PE(18:3(9Z,12Z,15Z)/20:3(5Z,8Z,11Z))	HMDB09166
		PE(18:2(9Z,12Z)/20:4(8Z,11Z,14Z,17Z))	HMDB09103
		PE(16:1(9Z)/22:5(4Z,7Z,10Z,13Z,16Z))	HMDB08977
		PE(20:3(5Z,8Z,11Z)/18:3(9Z,12Z,15Z))	HMDB09326
		PE(18:3(6Z,9Z,12Z)/20:3(5Z,8Z,11Z))	HMDB09133
		PE(20:3(8Z,11Z,14Z)/18:3(9Z,12Z,15Z))	HMDB09359
		PE(18:3(6Z,9Z,12Z)/20:3(8Z,11Z,14Z))	HMDB09134
		PE(20:3(5Z,8Z,11Z)/18:3(6Z,9Z,12Z))	HMDB09325
		PE(18:3(9Z,12Z,15Z)/20:3(8Z,11Z,14Z))	HMDB09167
		PE(O-16:1(1Z)/22:6(4Z,7Z,10Z,13Z,16Z,19Z))	HMDB05780
	PE aa C40:6	PE(P-18:1(11Z)/22:5(7Z,10Z,13Z,16Z,19Z))	HMDB11426
		PE(22:6(4Z,7Z,10Z,13Z,16Z,19Z)/P-18:0)	HMDB09709
		PE(22:5(7Z,10Z,13Z,16Z,19Z)/dm18:1(9Z))	HMDB09678
		PE(20:5(5Z,8Z,11Z,14Z,17Z)/20:1(11Z))	HMDB09461
		PE(20:2(11Z,14Z)/20:4(5Z,8Z,11Z,14Z))	HMDB09300
		PE(22:6(4Z,7Z,10Z,13Z,16Z,19Z)/18:0)	HMDB09684
		PE(22:5(7Z,10Z,13Z,16Z,19Z)/18:1(9Z))	HMDB09653
		PE(22:4(7Z,10Z,13Z,16Z)/18:2(9Z,12Z))	HMDB09588
		PE(20:4(5Z,8Z,11Z,14Z)/20:2(11Z,14Z))	HMDB09396
		PE(18:4(6Z,9Z,12Z,15Z)/22:2(13Z,16Z))	HMDB09206
		PE(18:0/22:6(4Z,7Z,10Z,13Z,16Z,19Z))	HMDB09012
		PE(22:5(7Z,10Z,13Z,16Z,19Z)/P-18:1(11Z))	HMDB09677
		PE(22:5(7Z,10Z,13Z,16Z,19Z)/18:1(11Z))	HMDB09652
		PE(20:1(11Z)/20:5(5Z,8Z,11Z,14Z,17Z))	HMDB09269
		PE(P-18:1(9Z)/22:5(7Z,10Z,13Z,16Z,19Z))	HMDB11459
		PE(P-18:0/22:6(4Z,7Z,10Z,13Z,16Z,19Z))	HMDB11394
		PE(20:3(5Z,8Z,11Z)/20:3(5Z,8Z,11Z))	HMDB09331
		PE(18:2(9Z,12Z)/22:4(7Z,10Z,13Z,16Z))	HMDB09108
		PE(18:1(9Z)/22:5(7Z,10Z,13Z,16Z,19Z))	HMDB09077
		PE(18:1(11Z)/22:5(7Z,10Z,13Z,16Z,19Z))	HMDB09044
		PE(22:5(4Z,7Z,10Z,13Z,16Z)/P-18:1(9Z))	HMDB09645
		PE(18:1(11Z)/22:5(4Z,7Z,10Z,13Z,16Z))	HMDB09043
		PE(P-18:1(9Z)/22:5(4Z,7Z,10Z,13Z,16Z))	HMDB11458
		PE(P-18:1(11Z)/22:5(4Z,7Z,10Z,13Z,16Z))	HMDB11425
		PE(20:4(8Z,11Z,14Z,17Z)/20:2(11Z,14Z))	HMDB09429
		PE(18:1(9Z)/22:5(4Z,7Z,10Z,13Z,16Z))	HMDB09076
		PE(22:5(4Z,7Z,10Z,13Z,16Z)/18:1(9Z))	HMDB09620
		PE(20:3(8Z,11Z,14Z)/20:3(5Z,8Z,11Z))	HMDB09364
		PE(22:5(4Z,7Z,10Z,13Z,16Z)/P-18:1(11Z))	HMDB09644
		PE(22:5(4Z,7Z,10Z,13Z,16Z)/18:1(11Z))	HMDB09619
		PE(20:3(8Z,11Z,14Z)/20:3(8Z,11Z,14Z))	HMDB09365
		PE(20:3(5Z,8Z,11Z)/20:3(8Z,11Z,14Z))	HMDB09332
		PE(20:2(11Z,14Z)/20:4(8Z,11Z,14Z,17Z))	HMDB09301
	PE aa C40:7	PE(P-18:1(11Z)/22:6(4Z,7Z,10Z,13Z,16Z,19Z))	HMDB11427
		PE(22:6(4Z,7Z,10Z,13Z,16Z,19Z)/P-18:1(9Z))	HMDB09711
		PE(22:6(4Z,7Z,10Z,13Z,16Z,19Z)/P-18:1(11Z))	HMDB09710
		PE(22:6(4Z,7Z,10Z,13Z,16Z,19Z)/18:1(11Z))	HMDB09685
		PE(P-18:1(9Z)/22:6(4Z,7Z,10Z,13Z,16Z,19Z))	HMDB11460
		PE(20:4(5Z,8Z,11Z,14Z)/20:3(5Z,8Z,11Z))	HMDB09397
		PE(18:1(9Z)/22:6(4Z,7Z,10Z,13Z,16Z,19Z))	HMDB09078
		PE(20:5(5Z,8Z,11Z,14Z,17Z)/20:2(11Z,14Z))	HMDB09462
		PE(20:3(5Z,8Z,11Z)/20:4(5Z,8Z,11Z,14Z))	HMDB09333
		PE(22:6(4Z,7Z,10Z,13Z,16Z,19Z)/18:1(9Z))	HMDB09686
		PE(22:5(7Z,10Z,13Z,16Z,19Z)/18:2(9Z,12Z))	HMDB09654
		PE(20:2(11Z,14Z)/20:5(5Z,8Z,11Z,14Z,17Z))	HMDB09302
		PE(18:2(9Z,12Z)/22:5(7Z,10Z,13Z,16Z,19Z))	HMDB09110
		PE(18:1(11Z)/22:6(4Z,7Z,10Z,13Z,16Z,19Z))	HMDB09045
		PE(20:3(5Z,8Z,11Z)/20:4(8Z,11Z,14Z,17Z))	HMDB09334
		PE(22:4(7Z,10Z,13Z,16Z)/18:3(6Z,9Z,12Z))	HMDB09589
		PE(20:3(8Z,11Z,14Z)/20:4(5Z,8Z,11Z,14Z))	HMDB09366
		PE(22:4(7Z,10Z,13Z,16Z)/18:3(9Z,12Z,15Z))	HMDB09590
		PE(18:2(9Z,12Z)/22:5(4Z,7Z,10Z,13Z,16Z))	HMDB09109
		PE(22:5(4Z,7Z,10Z,13Z,16Z)/18:2(9Z,12Z))	HMDB09621
		PE(20:4(8Z,11Z,14Z,17Z)/20:3(8Z,11Z,14Z))	HMDB09431
		PE(18:3(9Z,12Z,15Z)/22:4(7Z,10Z,13Z,16Z))	HMDB09174
		PE(18:3(6Z,9Z,12Z)/22:4(7Z,10Z,13Z,16Z))	HMDB09141
		PE(20:4(8Z,11Z,14Z,17Z)/20:3(5Z,8Z,11Z))	HMDB09430
		PE(20:4(5Z,8Z,11Z,14Z)/20:3(8Z,11Z,14Z))	HMDB09398
		PE(20:3(8Z,11Z,14Z)/20:4(8Z,11Z,14Z,17Z))	HMDB09367
	PG aa C34:1	PG(18:1(11Z)/16:0)	HMDB10615	n/a
		PG(16:0/18:1(11Z))	HMDB10573
		PG(18:1(9Z)/16:0)	HMDB10630
		PG(16:1(9Z)/18:0)	HMDB10587
		PG(18:0/16:1(9Z))	HMDB10601
		PG(16:0/18:1(9Z))	HMDB10574
	PS aa C38:4	PS(18:0/20:4(5Z,8Z,11Z,14Z))	HMDB12383	R01800	n/a
		PS(20:4(5Z,8Z,11Z,14Z)/18:0)	HMDB12433	R02055	Q505E1	4.1.1.65	K01613	320951
		PS(18:0/20:4(8Z,11Z,14Z,17Z))	HMDB10165		Q8BSF4	4.1.1.65	K01613	320951
		PS(20:3(8Z,11Z,14Z)/18:1(9Z))	HMDB12423	R04034	n/a
		PS(18:1(9Z)/20:3(8Z,11Z,14Z))	HMDB12393	R07376	Q9Z1X2		K08730	27388
				R07377	Q99LH2		K08729	19210
				R09035	n/a
	SM C16:0	not annotated	not annotated	n/a	n/a
