# Supplementary material for: Altered lipid metabolism in the aging kidney identified by three layered omic analysis
Source: publisher site journal article supplement (doi:10.18632/aging.100900), 2016-02-16
Supplement: Supplementary file [file aging-v8i3-100900-supplementary-material-SD1.pdf]

SUPPLEMENTAL DATA

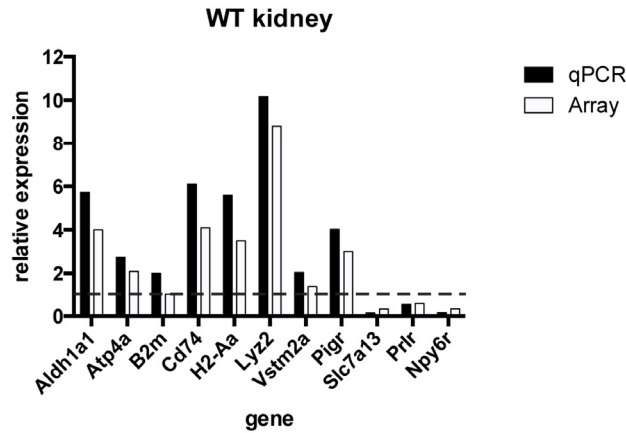

**Figure S1. qPCR validation of array data.** The regulation of 10 randomly selected genes from the microarray analysis was validated by using quantitative real-time PCR. All genes investigated were regulated in the same direction in microarray datasets and in qRT-PCR. Expression levels of housekeeping gene B2M as set to 1 (dotted line).

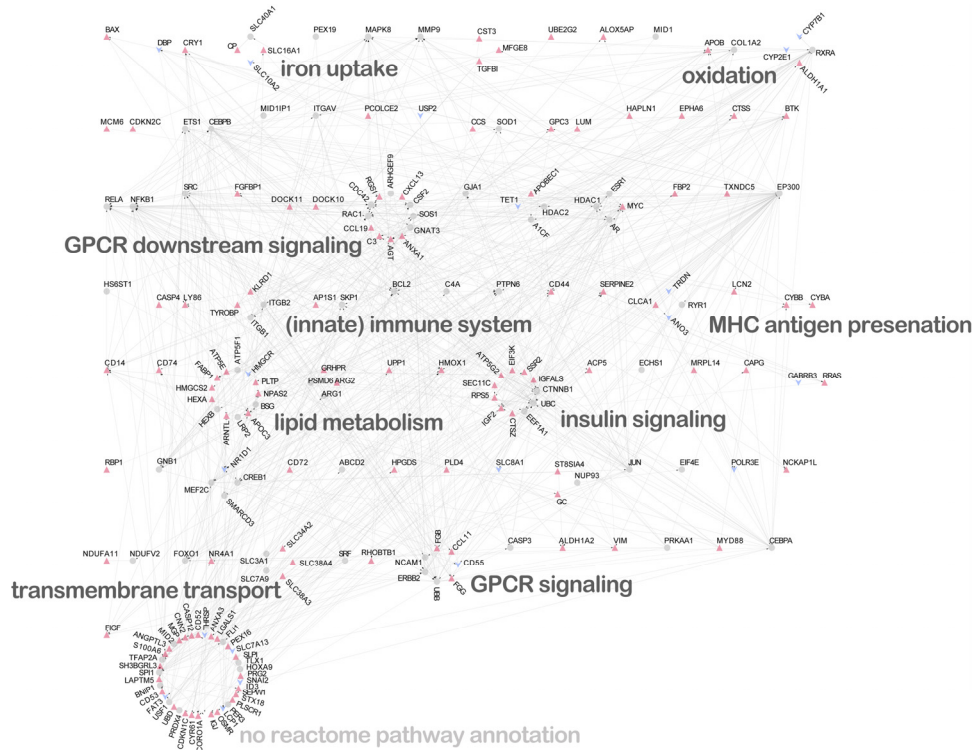

**Figure S2. Reactome pathway enrichment of differentially expressed genes.** Reactome FI was used to generate this network of enriched pathways, with one linker node allowed. Genes were annotated with and clustered based on Reactome pathways. In accordance to GO term enrichment, pathways that were enriched include lipid metabolism, G-protein-coupled receptor (GPCR) signaling, (innate) immune response, as well as iron metabolism. Up-regulated genes are represented by red triangles, down-regulation is indicated using blue down-arrows. Linker nodes are shown as grey circles.

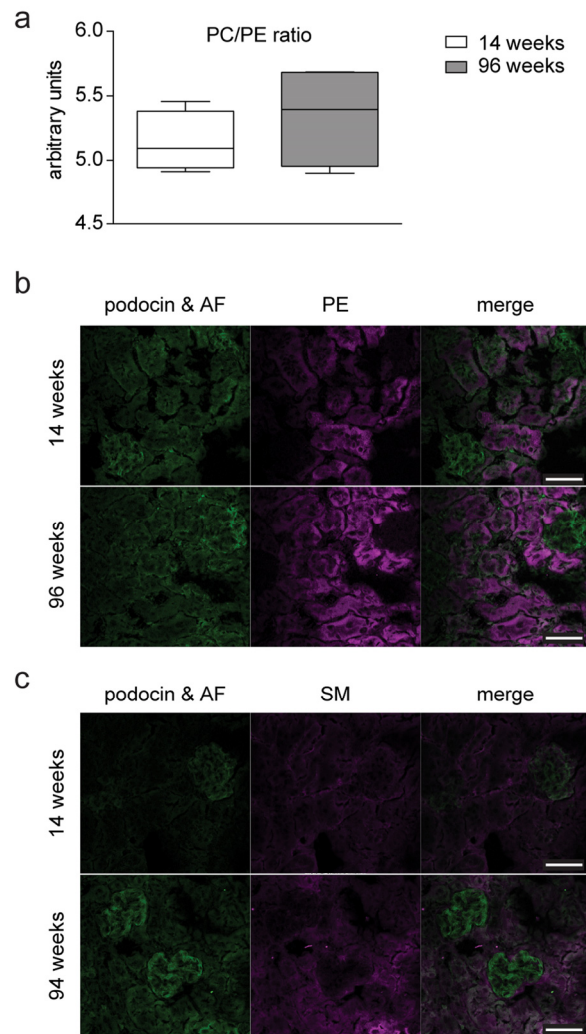

**Figure S3. PC/PE ratio and lipid stainings show no difference between age groups. (a)** Phosphatidylcholine/Phosphatidylethanolamine (PC/PE) ratio **(b)** PE staining on young and aged kidneys. Stainings show a high abundance in the tubular system without glomerular staining. **(c)** SM staining on young and aged kidneys. Little abundance can be detected in glomeruli. Tubuli show interstitial and intracellular staining. Podocin and autofluorescence (AF) were used as a control. Boxplots depict mean values with whiskers showing 5-95% percentile.

**Supplemental Table S1. qPCR primer sequences and assay numbers**

| Gene           | Primer      | Sequence (5'-3')          | Commercial | No.           |
|----------------|-------------|---------------------------|------------|---------------|
| <b>Fabp1</b>   | Forward     | CGAACTGGAGACCATGACTGG     | No         |               |
|                | Reverse     | CAATGTCATGGTATTGGTGATTGTG | No         |               |
| <b>Kim1</b>    | Forward     | AAGAAATCTAGGTCAGTACCATGAA | No         |               |
|                | Reverse     | CACCACCCCCTTTACTTCCA      | No         |               |
| <b>Lcn2</b>    | Forward     | CCCCATCTCTGCTCACTGTC      | No         |               |
|                | Reverse     | TTTTTCTGGACCGCATTG        | No         |               |
| <b>Aldh1a1</b> | probe based |                           | Yes        | Mm00657317 ml |
| <b>Atp4a</b>   | probe based |                           | Yes        | Mm00444417 ml |
| <b>B2m</b>     | probe based |                           | Yes        | Mm00437762 ml |
| <b>Cd74</b>    | probe based |                           | Yes        | Mm00658576 ml |
| <b>H2-Aa</b>   | probe based |                           | Yes        | Mm00439211 ml |
| <b>Lyz2</b>    | probe based |                           | Yes        | Mm01612741 ml |
| <b>Vstm2a</b>  | probe based |                           | Yes        | Mm00461305 ml |
| <b>Pigr</b>    | probe based |                           | Yes        | Mm00465049 ml |
| <b>Slc7a13</b> | probe based |                           | Yes        | Mm00503856 ml |
| <b>Prlr</b>    | probe based |                           | Yes        | Mm00599957 ml |
| <b>Npy6r</b>   | probe based |                           | Yes        | Mm00627550 ml |
